# Supplementary material for: Cytokinin Signaling Are Required for Multi-Main Stems Development in <em>Brassica napus</em> L.
Source: Preprints.org preprint supplement (doi:10.20944/preprints202304.0586.v1), 2023-04-19
Supplement: Supplementary file 1 [file supplementary]

## Sheet: MT VS ST 15
Supplemental Data1. The DEGs between MS mutant and WT at different DAG.
ST: Time after germination of single-stem plants (WT), MT: Time after germination of multi-stems (MS) mutants.
DEGs were selected by p values < 0.05 and absolute values of log2 (fold change) ≥1
Gene ID	Description	log2(FC)	P-value
LOC106376336	60S ribosomal protein L8-3	4.93499	3.16327e-262
LOC106453015	sodium/hydrogen exchanger 2-like	-6.69072	3.43869e-236
LOC106400726	uncharacterized protein At3g06530-like	-5.76336	1.65896e-231
LOC106401687	galactokinase-like	-7.75594	2.64357e-222
LOC106451441	uncharacterized LOC106451441	6.13566	2.66857e-202
LOC106349210	probable galacturonosyltransferase 9	5.43088	6.57735e-198
LOC106433407	40S ribosomal protein S3a	-6.25336	2.51719e-170
LOC106453049	uncharacterized LOC106453049	-4.51255	5.94025e-170
LOC106400541	60S ribosomal protein L29-1-like	-9.37158	1.01197e-167
LOC106453030	alpha-dioxygenase 1	-7.57129	3.73908e-166
LOC106365675	glyceraldehyde-3-phosphate dehydrogenase	-5.03914	5.59992e-166
LOC106400969	DEAD-box ATP-dependent RNA helicase 50-like	-4.86714	5.15571e-162
LOC106402016	aldehyde dehydrogenase 22A1-like	-6.602	7.76906e-146
LOC106349212	6-phosphogluconate dehydrogenase	4.1899	6.31497e-145
LOC106350872	S-adenosylmethionine decarboxylase proenzyme 3-like	4.56489	1.80893e-141
LOC106358502	uncharacterized LOC106358502	-6.61536	2.5468e-141
LOC106385319	uncharacterized LOC106385319	-7.59566	9.60394e-135
LOC106372613	40S ribosomal protein S23-2	6.10935	1.99817e-127
LOC106400534	serine/threonine-protein phosphatase 4 regulatory subunit 3-like	-4.25201	1.79141e-124
LOC106357764	uncharacterized LOC106357764	6.08931	9.77838e-123
LOC106400574	beta-glucosidase-like SFR2	-3.25331	2.71567e-118
LOC106364421	ultraviolet-B receptor UVR8-like	5.43591	1.29148e-117
LOC106390601	40S ribosomal protein S23-2	5.7196	1.75381e-117
LOC106453025	gibberellin receptor GID1A-like	-4.38207	8.96775e-114
LOC106453019	WD repeat-containing protein 48-like	-6.30858	2.25474e-113
LOC106453023	cingulin-like	-3.80516	1.09652e-110
LOC106397395	transcription factor bHLH148-like	-5.18678	7.00773e-110
LOC106418259	uncharacterized LOC106418259	4.60723	4.55135e-108
LOC106453021	probable polygalacturonase	-7.53744	2.80558e-106
LOC106454340	uncharacterized LOC106454340	-7.54328	3.86189e-106
LOC106365672	uncharacterized LOC106365672	-8.02262	1.16307e-103
LOC106365667	60S ribosomal protein L23	-4.77858	6.27595e-103
LOC106445308	T-complex protein 1 subunit theta-like	-3.37253	1.46663e-100
LOC106365674	40S ribosomal protein S16-3-like	-5.65428	3.70602e-98
LOC106405618	uncharacterized LOC106405618	-3.74998	4.01315e-98
LOC106447286	uncharacterized LOC106447286	6.02238	1.19959e-97
LOC106349205	uncharacterized protein At1g04910-like	3.76177	4.84898e-96
LOC106433369	40S ribosomal protein S24-1	-3.42111	5.7563e-96
LOC106366805	pentatricopeptide repeat-containing protein At3g02650	9.29808	1.98187e-91
LOC106372582	metallothionein-like protein type 2	2.3631	2.08753e-91
LOC106366833	60S ribosomal protein L32-1	-4.12696	2.41269e-90
LOC106349686	glyoxysomal fatty acid beta-oxidation multifunctional protein MFP-a-like	-4.05837	3.06685e-86
LOC106354691	alpha	-4.60525	3.1157e-85
LOC106389703	uncharacterized LOC106389703	3.92833	8.24528e-84
LOC106453014	probable serine/threonine-protein kinase At1g54610	-4.6188	1.09873e-83
LOC106389547	uncharacterized LOC106389547	4.90585	1.79298e-81
LOC106398694	thioredoxin-like protein AAED1	4.08148	1.94858e-81
LOC106386617	serine/threonine-protein kinase ULK4-like	3.03434	4.98392e-81
LOC106449541	glutathione S-transferase T3-like	7.57006	1.04821e-80
LOC106418132	probable inactive leucine-rich repeat receptor-like protein kinase At3g03770	3.20579	6.8749e-80
LOC106356911	uncharacterized LOC106356911	4.5822	1.51346e-77
LOC106365673	probable UDP-N-acetylglucosamine--peptide N-acetylglucosaminyltransferase SEC	-2.81542	8.60024e-77
LOC106397375	sodium/hydrogen exchanger 3	-3.58057	6.46469e-75
LOC106397227	60S ribosomal protein L22-2-like	-3.07655	1.58544e-74
LOC106437510	uncharacterized LOC106437510	-5.60883	7.49886e-73
LOC106446112	cingulin-like	4.12305	1.25016e-71
LOC106365662	histone deacetylase 19-like	-5.23568	1.768e-70
LOC106443096	probable histone H2A.1	2.79165	3.96689e-67
LOC106400994	putative chromatin-remodeling complex ATPase chain	-2.68214	2.44521e-66
LOC106437664	uncharacterized LOC106437664	3.77831	4.87086e-66
LOC106387746	NADH--cytochrome b5 reductase 1	2.80167	1.5095e-65
LOC106387118	uncharacterized LOC106387118	8.88247	4.12761e-65
LOC106445724	uncharacterized LOC106445724	2.75152	1.36174e-63
LOC106401438	uncharacterized LOC106401438	-3.57875	1.59148e-63
LOC106400578	3-dehydrosphinganine reductase TSC10A	-2.98677	4.55031e-63
LOC106401267	huntingtin-interacting protein K-like	-3.75888	5.2997e-63
LOC106401569	uncharacterized LOC106401569	-4.89975	5.75633e-63
LOC106453029	GDSL esterase/lipase At3g05180	-5.07179	1.65151e-62
LOC106346061	splicing factor U2af large subunit B-like	2.35026	2.68818e-62
LOC106397166	zinc finger CCCH domain-containing protein 34	-6.9872	4.04793e-62
LOC106381605	uncharacterized isomerase BH0283-like	3.29881	5.03475e-62
LOC106376331	MLP-like protein 328	-5.71064	9.55322e-62
LOC106447116	profilin-1-like	-2.34616	2.5017e-61
LOC106401265	RAF proto-oncogene serine/threonine-protein kinase-like	-5.00834	4.16954e-61
LOC106453002	uncharacterized LOC106453002	-8.60565	3.16386e-60
LOC106438835	kinesin-like protein KIF22-B	-3.9097	3.48038e-60
LOC106397336	probable histone-arginine methyltransferase 1.3	-2.77432	3.85063e-60
LOC106390156	uncharacterized LOC106390156	9.30401	7.63818e-60
LOC106390509	uncharacterized LOC106390509	-3.93989	3.25872e-59
LOC106352581	uncharacterized LOC106352581	-4.08529	3.62559e-59
LOC106361087	vacuolar protein sorting-associated protein 45 homolog	2.23839	2.74447e-58
LOC106453027	sugar transporter ERD6-like 11	-3.49574	8.93282e-57
LOC106399105	uncharacterized LOC106399105	-2.52126	2.47081e-55
LOC106447281	tropinone reductase homolog At2g29320-like	-3.85555	1.96611e-54
LOC106406593	DEAD-box ATP-dependent RNA helicase 14-like	11.4739	4.94958e-54
LOC106400945	probable acyl-CoA dehydrogenase IBR3	-2.4311	2.59714e-53
LOC106348748	probable acyl-CoA dehydrogenase IBR3	1.91696	4.47284e-52
LOC106451764	uncharacterized LOC106451764	2.33936	3.48551e-51
LOC106354803	nudix hydrolase 3-like	-6.13218	6.82949e-51
LOC106440321	uncharacterized LOC106440321	-7.56602	2.89955e-50
LOC106390436	uncharacterized LOC106390436	-3.68332	6.40648e-50
LOC106451289	26S proteasome non-ATPase regulatory subunit 1 homolog A-like	-2.01146	1.85079e-49
LOC106453218	thioredoxin F1	4.22159	4.74655e-49
LOC106418130	polyribonucleotide nucleotidyltransferase 1	2.77049	1.15699e-48
LOC106445315	putative H/ACA ribonucleoprotein complex subunit 1-like protein 1	-3.18892	1.85094e-48
LOC106362991	uncharacterized LOC106362991	8.7887	8.25223e-48
LOC106453011	uncharacterized LOC106453011	-7.39241	1.46634e-47
LOC106453198	inositol-phosphate phosphatase	2.78938	4.44559e-47
LOC106451763	sterol 3-beta-glucosyltransferase UGT80A2-like	-5.72164	5.81935e-47
LOC106433425	auxin-responsive protein IAA16-like	-3.92649	1.61943e-46
LOC106385441	gibberellin-regulated protein 5-like	3.46728	3.28876e-46
LOC106399657	glutathione S-transferase T3-like	6.51315	3.50936e-46
LOC106381973	uncharacterized GPI-anchored protein At3g06035-like	-2.16347	6.03643e-46
LOC106399120	rab proteins geranylgeranyltransferase component A 2-like	-9.74818	6.16556e-46
LOC106445690	tRNA(His) guanylyltransferase 1	3.03719	2.6489e-45
LOC106354656	histone acetyltransferase HAC1-like	-3.14425	1.03552e-44
LOC106409076	uncharacterized LOC106409076	3.33849	1.54455e-44
LOC106354597	nitrate reductase [NADH]	-7.55321	2.31226e-44
LOC106452268	uncharacterized LOC106452268	2.69378	2.48808e-43
LOC106366808	acyl-[acyl-carrier-protein] desaturase 5	2.46939	8.61222e-43
LOC106446394	nifU-like protein 4	4.29168	1.10672e-41
LOC106397329	probable histone-arginine methyltransferase 1.3	-4.52943	2.4151e-41
LOC106381440	uncharacterized LOC106381440	11.5738	2.49945e-41
LOC106400579	peroxiredoxin-2F	-1.92906	3.894e-41
LOC106371093	protein NRT1/ PTR FAMILY 5.12-like	3.85161	6.36699e-41
LOC106358424	photosystem II 5 kDa protein	3.23035	6.36961e-41
LOC106347213	uncharacterized LOC106347213	-3.00446	7.35631e-41
LOC106405982	coleoptile phototropism protein 1-like	-4.09047	7.81354e-41
LOC106349214	uncharacterized LOC106349214	3.05727	8.09235e-41
LOC106366810	delta(7)-sterol-C5(6)-desaturase 1-like	3.57284	1.33981e-40
LOC106454688	uncharacterized LOC106454688	2.84146	2.38755e-40
LOC106435447	uncharacterized LOC106435447	2.0838	4.63923e-40
LOC106386625	F-box/FBD/LRR-repeat protein At5g18770-like	3.25698	4.67102e-40
LOC106381497	wall-associated receptor kinase-like 22	-6.15795	3.41096e-39
LOC106403511	adenosine kinase 2-like	-2.06377	4.19893e-39
LOC106445693	40S ribosomal protein S3-2-like	1.79163	7.7423e-39
LOC106378422	nucleoid-associated protein PCC8801_2554-like	3.92255	8.12404e-39
LOC106453038	filament-like plant protein 3	-2.08838	4.31211e-38
LOC106454060	nitrile-specifier protein 1-like	3.50568	5.34519e-38
LOC106354685	50S ribosomal protein L13	-8.87726	6.47233e-38
LOC106453007	trafficking protein particle complex subunit 6B-like	-1.91254	1.39029e-37
LOC106451439	replication protein A 70 kDa DNA-binding subunit B-like	2.82208	1.60583e-37
LOC106396206	aquaporin NIP2-1	-8.84123	3.80618e-37
LOC106451693	probable carboxylesterase 5	2.37037	4.71274e-37
LOC106381717	uncharacterized LOC106381717	3.81869	2.46527e-36
LOC106398703	RNA-binding protein CP29B	1.51532	2.94481e-36
LOC106387748	zinc finger protein VAR3	3.76824	3.05132e-36
LOC106453004	uncharacterized LOC106453004	-9.58525	3.54308e-36
LOC106387753	microfibrillar-associated protein 1-like	2.86791	4.66359e-36
LOC106369660	60S ribosomal protein L35-1	2.14504	6.60827e-36
LOC106366807	mannose-6-phosphate isomerase 1-like	9.68894	7.69689e-36
LOC106347543	uncharacterized LOC106347543	9.76521	1.78842e-35
LOC106372581	kinesin-like protein KIF22-B	2.03015	6.15229e-35
LOC106397137	guanylate kinase 3	-3.57726	8.34882e-35
LOC106400865	phosphoglycerate mutase-like protein 1	-4.818	1.01607e-34
LOC106401486	glyoxysomal fatty acid beta-oxidation multifunctional protein MFP-a-like	-2.86336	2.78321e-34
LOC106451751	uncharacterized LOC106451751	9.00093	3.09537e-34
LOC106401717	CAS1 domain-containing protein 1-like	-2.67736	3.35856e-34
LOC106388151	putative ATP-dependent RNA helicase DHX33	3.7438	4.52223e-34
LOC106389821	uncharacterized LOC106389821	3.38767	8.39051e-34
LOC106349213	FHA domain-containing protein At4g14490-like	7.14344	9.83115e-34
LOC106371603	uncharacterized LOC106371603	-9.55366	4.76034e-33
LOC106346100	serine/threonine-protein phosphatase 4 regulatory subunit 3-like	-2.479	7.24623e-33
LOC106398710	aquaporin PIP2-2-like	-3.41856	8.22118e-33
LOC106388330	uncharacterized LOC106388330	-9.2184	1.10585e-32
LOC106368011	uncharacterized protein At5g48480-like	1.69591	1.18318e-32
LOC106433386	protein HASTY 1-like	-9.12232	1.19039e-32
LOC106387487	uncharacterized LOC106387487	9.31506	3.09507e-32
LOC106415083	uncharacterized LOC106415083	-3.58681	3.16191e-32
LOC106349745	acetyl-CoA carboxylase 1-like	-5.93153	4.72974e-32
LOC106387749	zinc finger protein VAR3	2.89478	7.72856e-32
LOC106369987	uncharacterized LOC106369987	4.06248	1.7613e-31
LOC106366802	beta-catenin-like protein 1	17.6742	2.13488e-31
LOC106435426	protein CYPRO4-like	2.42637	2.19181e-31
LOC106439137	uncharacterized LOC106439137	3.13667	2.25125e-31
LOC106347724	momilactone A synthase	-2.34385	2.52035e-31
LOC106368428	uncharacterized LOC106368428	2.75423	3.88383e-31
LOC106453071	trafficking protein particle complex subunit 6B-like	1.62149	6.18434e-31
LOC106418001	uncharacterized LOC106418001	4.09726	6.29835e-31
LOC106450288	aquaporin NIP2-1-like	-18.5174	6.62875e-31
LOC106352568	receptor-like serine/threonine-protein kinase NCRK	3.08849	6.8225e-31
LOC106349123	uncharacterized LOC106349123	3.70113	8.26743e-31
LOC106452997	beta-glucosidase-like SFR2	1.41671	8.85395e-31
LOC106445304	disease resistance protein TAO1-like	-2.35309	4.7255e-30
LOC106452346	uncharacterized LOC106452346	1.44804	6.11097e-30
LOC106362022	60S ribosomal protein L22-2-like	-2.24054	6.22941e-30
LOC106416599	protein TRI1-like	2.94011	6.42724e-30
LOC106415626	UDP-D-apiose/UDP-D-xylose synthase 2-like	-2.21517	9.74039e-30
LOC106447497	chlorophyll a-b binding protein 1	-1.89889	1.02448e-29
LOC106406037	cytochrome c oxidase subunit 5b-1	1.56288	1.41318e-29
LOC106451798	histidine biosynthesis bifunctional protein hisIE	1.67548	2.81576e-29
LOC106453000	pyruvate dehydrogenase (acetyl-transferring) kinase	3.88543	4.80065e-29
LOC106386882	L-type lectin-domain containing receptor kinase I.9-like	-2.85055	5.17717e-29
LOC106402510	monothiol glutaredoxin-S15	2.20645	5.81187e-29
LOC106352208	probable galacturonosyltransferase 9	-1.7408	5.889e-29
LOC106400542	60S ribosomal protein L29-1-like	-10.0804	6.56278e-29
LOC106386751	dolichyl-diphosphooligosaccharide--protein glycosyltransferase subunit STT3A-like	1.4689	6.57206e-29
LOC106356752	uncharacterized LOC106356752	17.8765	7.02808e-29
LOC106366804	thioredoxin F-type	18.4364	7.78007e-29
LOC106399923	uncharacterized LOC106399923	-2.61844	8.03551e-29
LOC106453039	protein YIPF1 homolog	-2.81408	1.03516e-28
LOC106451283	protein disulfide-isomerase 2-3	-2.1814	1.39303e-28
LOC106382107	glycine-rich RNA-binding protein RZ1A-like	2.12556	1.86468e-28
LOC106381716	cyclin-dependent kinase F-4-like	17.112	2.1185e-28
LOC106388158	F-box/LRR-repeat protein At2g43260-like	3.16656	2.42598e-28
LOC106345957	40S ribosomal protein S16-3-like	1.81042	4.30619e-28
LOC106375019	uncharacterized LOC106375019	3.74424	9.63087e-28
LOC106431344	putative F-box protein At3g23420	3.49622	9.99155e-28
LOC106443160	PITH domain-containing protein At3g04780-like	-9.57402	1.02215e-27
LOC106452336	RNA-binding protein PNO1 pseudogene	1.92903	1.06235e-27
LOC106452270	uncharacterized LOC106452270	1.57795	1.13014e-27
LOC106366487	uncharacterized LOC106366487	-8.84491	1.30634e-27
LOC106398690	40S ribosomal protein S5-1-like	1.56849	2.13427e-27
LOC106357763	uncharacterized LOC106357763	2.85589	2.26485e-27
LOC106352909	transcription factor bHLH148-like	-17.5788	2.9822e-27
LOC106384810	NADPH--cytochrome P450 reductase 2-like	-9.1528	3.13281e-27
LOC106412213	uracil-DNA glycosylase	2.56413	3.19817e-27
LOC106352955	serine/threonine-protein kinase PAK 3-like	-1.59964	4.21151e-27
LOC106415492	protein RRP5 homolog	1.7439	5.42309e-27
LOC106383226	uncharacterized LOC106383226	5.84134	6.66321e-27
LOC106386574	anamorsin homolog	1.80877	9.56429e-27
LOC106361150	NADPH--cytochrome P450 reductase 2-like	-4.31839	9.88459e-27
LOC106345841	uncharacterized LOC106345841	12.9411	9.90716e-27
LOC106399485	uncharacterized LOC106399485	6.88212	1.02693e-26
LOC106453020	coiled-coil domain-containing protein 12-like	-17.9891	1.83699e-26
LOC106451303	dolichol kinase-like	1.75992	1.90109e-26
LOC106371939	probable arabinosyltransferase ARAD1	3.09237	1.92413e-26
LOC106372588	uncharacterized LOC106372588	1.488	2.06282e-26
LOC106387185	uncharacterized LOC106387185	2.06825	3.65514e-26
LOC106382855	signal peptide peptidase-like	1.80936	4.50154e-26
LOC106451592	uncharacterized LOC106451592	-1.63447	4.72217e-26
LOC106368427	uncharacterized LOC106368427	3.08231	7.05693e-26
LOC106435000	KRR1 small subunit processome component homolog	-4.91488	7.45761e-26
LOC106397587	bifunctional 3-dehydroquinate dehydratase/shikimate dehydrogenase	-2.31696	8.01956e-26
LOC106387274	probable protein phosphatase 2C 33	-1.5304	1.06232e-25
LOC106438690	bifunctional 3-dehydroquinate dehydratase/shikimate dehydrogenase	-2.52626	1.16295e-25
LOC106372453	aspartic proteinase nepenthesin-2-like	16.4906	1.16898e-25
LOC106451429	uncharacterized LOC106451429	16.7411	1.58809e-25
LOC106400130	shaggy-related protein kinase gamma-like	-1.74631	1.79447e-25
LOC106411750	uncharacterized LOC106411750	2.58196	2.2449e-25
LOC106397104	uncharacterized LOC106397104	-2.11882	3.76724e-25
LOC106385598	uncharacterized LOC106385598	-17.3217	4.44671e-25
LOC106381763	3-oxoacyl-[acyl-carrier-protein] synthase I	-3.70284	7.28073e-25
LOC106389521	UDP-galactose transporter 1-like	-3.13064	7.664e-25
LOC106452082	uncharacterized LOC106452082	4.48789	7.82575e-25
LOC106451743	plastidal glycolate/glycerate translocator 1	1.59319	9.84659e-25
LOC106451609	E3 ubiquitin-protein ligase CCNB1IP1 homolog	1.9812	1.07771e-24
LOC106449823	uncharacterized LOC106449823	-2.79251	1.42182e-24
LOC106351463	auxin-responsive protein SAUR36-like	-1.65539	1.55855e-24
LOC106354769	proteasome subunit alpha type-2-A	-16.8495	1.9302e-24
LOC106451044	60S ribosomal protein L36-2-like	1.33547	2.29491e-24
LOC106365668	uncharacterized LOC106365668	-15.8284	3.02592e-24
LOC106433858	protein PIR-like	-2.3291	3.17284e-24
LOC106454808	uncharacterized LOC106454808	4.31671	3.19823e-24
LOC106385711	tubulin alpha-2 chain	1.41005	3.83174e-24
LOC106386627	FBD-associated F-box protein At5g18780-like	-3.70106	4.73978e-24
LOC106397314	elongation of fatty acids protein 3-like	-4.63993	4.91382e-24
LOC106454850	uncharacterized LOC106454850	4.17953	5.42977e-24
LOC106453200	probable inactive receptor kinase At3g02880	1.70682	7.84959e-24
LOC106451134	ubiquitin-60S ribosomal protein L40	-1.99711	9.01925e-24
LOC106387273	probable protein phosphatase 2C 33	-1.48622	9.40846e-24
LOC106401568	tubby-like F-box protein 9	-2.06341	1.00623e-23
LOC106386931	histone deacetylase HDT2-like	2.05079	1.37305e-23
LOC106453001	elongation of fatty acids protein 3-like	2.11494	1.49979e-23
LOC106406326	lipoxygenase 2	2.49289	1.50807e-23
LOC106366828	probable methyltransferase PMT14	-3.79532	1.63841e-23
LOC106368372	uncharacterized LOC106368372	12.1071	1.92162e-23
LOC106451871	zinc transporter ZTP29	-1.63951	2.11412e-23
LOC106386629	50S ribosomal protein L33-like	2.49707	2.1413e-23
LOC106395992	uncharacterized LOC106395992	4.1268	2.18448e-23
LOC106454343	glycine-rich cell wall structural protein 1.0-like	-1.64532	2.94162e-23
LOC106387754	F-box protein At1g11270-like	8.0486	3.46483e-23
LOC106364402	uncharacterized LOC106364402	16.6348	5.02756e-23
LOC106452296	uncharacterized LOC106452296	1.32509	5.0533e-23
LOC106445709	uncharacterized LOC106445709	-2.46284	5.97331e-23
LOC106367138	light-regulated protein-like	1.63838	6.00196e-23
LOC106366803	WAT1-related protein At3g02690	16.0754	6.88576e-23
LOC106393603	protein STRUBBELIG-RECEPTOR FAMILY 7-like	-1.7284	6.95012e-23
LOC106351536	uncharacterized LOC106351536	6.3129	7.14237e-23
LOC106354797	probable protein phosphatase 2C 18	-1.91888	7.1893e-23
LOC106354669	uncharacterized LOC106354669	-17.1733	7.67928e-23
LOC106386139	uncharacterized LOC106386139	17.0994	8.19572e-23
LOC106401707	uncharacterized LOC106401707	-2.00844	8.29514e-23
LOC106371057	replication protein A 70 kDa DNA-binding subunit A-like	-15.5426	9.2546e-23
LOC106366524	uncharacterized LOC106366524	-3.85198	9.5985e-23
LOC106452015	uncharacterized LOC106452015	-1.79698	9.74367e-23
LOC106381714	cyclin-dependent kinase F-4-like	15.7445	9.79e-23
LOC106410842	protein ALWAYS EARLY 2-like	1.11153	9.88929e-23
LOC106365666	AT-hook motif nuclear-localized protein 14-like	-8.71442	1.02457e-22
LOC106451750	uncharacterized LOC106451750	16.1829	1.17399e-22
LOC106453199	IAA-amino acid hydrolase ILR1-like	2.69528	1.27267e-22
LOC106414311	AT-hook motif nuclear-localized protein 27	2.52296	1.52366e-22
LOC106357489	DNA polymerase I B	-1.56393	2.28935e-22
LOC106451049	uncharacterized protein At2g37660	1.87141	2.30737e-22
LOC106443917	mitochondrial import receptor subunit TOM6 homolog	-17.4834	3.23389e-22
LOC106365670	inositol phosphorylceramide glucuronosyltransferase 1-like	-15.5195	3.28641e-22
LOC106423085	CASP-like protein 5A1	2.51269	3.37831e-22
LOC106452978	probable pectate lyase 8	1.29704	3.63917e-22
LOC106387996	40S ribosomal protein S3-2	1.38094	4.00375e-22
LOC106347620	haloacid dehalogenase-like hydrolase domain-containing protein At3g48420	-15.9447	4.13003e-22
LOC106365665	protein EIN4	-4.30843	4.27647e-22
LOC106352885	CAS1 domain-containing protein 1-like	-15.2898	4.353e-22
LOC106435437	uncharacterized LOC106435437	2.45193	4.86124e-22
LOC106349208	probable tRNA (guanine(26)-N(2))-dimethyltransferase 2	15.3544	5.61527e-22
LOC106447512	E3 ubiquitin-protein ligase MARCH2-like	5.26202	6.19844e-22
LOC106381715	uncharacterized LOC106381715	5.2004	1.18743e-21
LOC106453006	cytadherence high molecular weight protein 2-like	-5.44327	1.19039e-21
LOC106451841	uncharacterized LOC106451841	16.2542	1.27364e-21
LOC106372477	40S ribosomal protein S6-2-like	1.24962	1.33206e-21
LOC106404144	uncharacterized protein At1g04910-like	-1.32293	1.44292e-21
LOC106389255	uncharacterized LOC106389255	-4.14167	1.85162e-21
LOC106389546	uncharacterized LOC106389546	-1.91452	1.86122e-21
LOC106453222	nijmegen breakage syndrome 1 protein	1.56324	1.95388e-21
LOC106364166	uncharacterized LOC106364166	7.90829	2.16534e-21
LOC106387286	mannose-6-phosphate isomerase 1-like	-1.51428	2.76463e-21
LOC106452089	dihydrolipoyl dehydrogenase 2	1.42335	3.67296e-21
LOC106371972	peptidyl-tRNA hydrolase 2	2.22054	3.94304e-21
LOC106387184	ubiquitin carboxyl-terminal hydrolase 23-like	1.90919	4.23395e-21
LOC106451428	disease resistance-like protein CSA1	14.1748	4.53312e-21
LOC106356201	uncharacterized LOC106356201	15.7848	4.80366e-21
LOC106450956	non-specific lipid-transfer protein D-like	1.20483	4.85137e-21
LOC106397795	uncharacterized LOC106397795	7.1957	5.44015e-21
LOC106452343	putative DUF21 domain-containing protein At3g13070	2.14304	6.14444e-21
LOC106345171	uncharacterized LOC106345171	15.6739	7.64399e-21
LOC106389825	nuclear pore complex protein NUP58-like	2.51486	8.10872e-21
LOC106453031	DNA excision repair protein ERCC-1	-2.03117	9.65184e-21
LOC106366024	uncharacterized LOC106366024	1.77847	9.9209e-21
LOC106401137	uncharacterized LOC106401137	7.946	9.98548e-21
LOC106391490	uncharacterized LOC106391490	15.1545	1.25098e-20
LOC106386140	uncharacterized LOC106386140	15.3341	1.28303e-20
LOC106397480	peptidyl-prolyl cis-trans isomerase CYP21-4	-16.0392	1.32211e-20
LOC106452211	uncharacterized LOC106452211	7.74661	1.34871e-20
LOC106385303	50S ribosomal protein 6	16.7344	1.36794e-20
LOC106445991	probable glutathione peroxidase 2	-2.03112	1.54027e-20
LOC106370738	uncharacterized LOC106370738	3.85708	1.56389e-20
LOC106353868	lipoxygenase 2	2.35947	1.69856e-20
LOC106445305	uncharacterized LOC106445305	-1.31384	1.70945e-20
LOC106354526	pathogenesis-related protein 5-like	-15.4243	2.00489e-20
LOC106354399	HVA22-like protein a	-2.07342	2.32334e-20
LOC106375313	probable malate dehydrogenase	3.24819	2.49966e-20
LOC106364420	uncharacterized LOC106364420	15.5153	2.50363e-20
LOC106349674	putative chromatin-remodeling complex ATPase chain	1.08528	2.50611e-20
LOC106415742	ubiquitin carboxyl-terminal hydrolase 13	1.13035	2.6009e-20
LOC106396207	aquaporin NIP2-1-like	-15.8906	3.06484e-20
LOC106454997	uncharacterized LOC106454997	15.9513	4.79348e-20
LOC106347202	uncharacterized LOC106347202	7.188	4.83641e-20
LOC106356029	receptor-like serine/threonine-protein kinase SD1-8	-16.5114	5.04314e-20
LOC106451118	serine/threonine-protein kinase KIPK-like	-1.6517	5.97784e-20
LOC106354688	B-box zinc finger protein 22-like	-7.67952	6.54372e-20
LOC106451304	dolichol kinase-like	2.12531	7.26254e-20
LOC106369026	polyubiquitin	2.04679	7.46454e-20
LOC106445473	uncharacterized LOC106445473	-2.90687	8.8636e-20
LOC106451426	uncharacterized LOC106451426	15.6433	9.04e-20
LOC106357765	wiskott-Aldrich syndrome protein family member 2-like	15.6585	9.83202e-20
LOC106386232	uncharacterized LOC106386232	-15.3126	1.21605e-19
LOC106445898	uncharacterized LOC106445898	14.4876	1.5464e-19
LOC106452098	phragmoplast orienting kinesin-1-like	1.51553	1.55988e-19
LOC106387189	shikimate O-hydroxycinnamoyltransferase-like	2.04644	1.56551e-19
LOC106376576	uncharacterized LOC106376576	14.493	1.64262e-19
LOC106440174	uncharacterized LOC106440174	1.26501	1.98826e-19
LOC106351532	uncharacterized LOC106351532	6.34906	1.9967e-19
LOC106352748	probable protein phosphatase 2C 35	-4.32692	2.03834e-19
LOC106415084	uncharacterized LOC106415084	-3.23655	2.07645e-19
LOC106397237	probable E3 ubiquitin ligase SUD1	-14.0107	2.09667e-19
LOC106453042	microtubule-binding protein TANGLED	-2.57156	2.13599e-19
LOC106366201	recQ-mediated genome instability protein 1-like	2.128	2.27274e-19
LOC106384828	U-box domain-containing protein 56-like	3.97457	2.36439e-19
LOC106452370	DCN1-like protein 2	1.38352	2.39196e-19
LOC106392378	uncharacterized LOC106392378	15.057	2.55268e-19
LOC106354680	gamma-glutamyl hydrolase 2-like	-15.2864	2.75675e-19
LOC106406863	uncharacterized LOC106406863	-1.84876	2.77391e-19
LOC106346114	GATA transcription factor 15-like	-15.8389	2.80132e-19
LOC106447977	uncharacterized LOC106447977	-8.45045	3.23249e-19
LOC106354687	mechanosensitive ion channel protein 6-like	-14.2745	3.30206e-19
LOC106445309	uncharacterized LOC106445309	-14.1175	3.42991e-19
LOC106362995	E3 ubiquitin-protein ligase At1g63170-like	2.78852	3.90194e-19
LOC106407719	uncharacterized LOC106407719	-5.67484	4.06449e-19
LOC106381760	uncharacterized LOC106381760	-17.1716	4.52602e-19
LOC106452326	receptor-like protein kinase BRI1-like 3	2.13432	4.58955e-19
LOC106390050	protein YIPF6 homolog	2.03573	4.62447e-19
LOC106402296	syntaxin-43	-2.08108	4.69577e-19
LOC106357583	haloacid dehalogenase-like hydrolase domain-containing protein At3g48420	-15.1224	4.8176e-19
LOC106453032	glycine-rich cell wall structural protein 1.8	-1.1508	4.94214e-19
LOC106387872	uncharacterized LOC106387872	-3.75703	5.11048e-19
LOC106454118	uncharacterized LOC106454118	14.3611	5.27002e-19
LOC106451402	probable glutathione peroxidase 2	-1.81769	5.77019e-19
LOC106354529	30S ribosomal protein S9	-1.55739	5.96947e-19
LOC106451288	probable serine/threonine-protein kinase DDB_G0276461	-2.20055	6.02404e-19
LOC106401596	thymidine kinase-like	2.91958	6.50158e-19
LOC106453043	probable Xaa-Pro aminopeptidase P	-1.23402	6.76404e-19
LOC106417876	uncharacterized LOC106417876	14.5865	6.82203e-19
LOC106399276	auxin-responsive protein IAA19-like	-1.76376	7.96477e-19
LOC106362990	uncharacterized LOC106362990	9.79848	8.05984e-19
LOC106389883	small nuclear ribonucleoprotein-associated protein B'-like	1.23927	8.25807e-19
LOC106438830	ABC transporter I family member 20	-1.93784	9.093e-19
LOC106451431	uncharacterized LOC106451431	10.0239	9.13083e-19
LOC106387146	beta-glucosidase 3-like	3.39272	9.4094e-19
LOC106352945	huntingtin-interacting protein K-like	-16.2563	9.48896e-19
LOC106350887	uncharacterized LOC106350887	15.2298	9.66427e-19
LOC106451031	uncharacterized LOC106451031	14.2891	9.93718e-19
LOC106449395	3-deoxy-manno-octulosonate cytidylyltransferase	2.35994	1.16074e-18
LOC106397788	uncharacterized LOC106397788	-15.2007	1.18417e-18
LOC106345193	uncharacterized LOC106345193	15.5594	1.31192e-18
LOC106398677	ABC transporter G family member 33-like	3.30552	1.37063e-18
LOC106374028	uncharacterized LOC106374028	-8.48175	1.39425e-18
LOC106354787	succinate-semialdehyde dehydrogenase	-1.11787	1.47172e-18
LOC106346112	thioredoxin-like protein CITRX	-15.9859	1.65315e-18
LOC106415500	rRNA 2'-O-methyltransferase fibrillarin-like	5.40616	1.70026e-18
LOC106387147	beta-glucosidase 3-like	1.97882	1.78888e-18
LOC106380862	lipoxygenase 2	3.27682	1.78975e-18
LOC106453034	signal peptidase complex subunit 3A	-1.67662	1.80525e-18
LOC106451747	uncharacterized LOC106451747	14.766	1.84523e-18
LOC106354801	uncharacterized LOC106354801	-15.9211	1.85545e-18
LOC106363247	zinc finger BED domain-containing protein RICESLEEPER 2-like	-13.8553	1.96471e-18
LOC106451752	uncharacterized LOC106451752	16.779	2.12115e-18
LOC106452994	CAS1 domain-containing protein 1-like	1.36635	2.20032e-18
LOC106450540	(Z)-3-hexen-1-ol acetyltransferase-like	3.2966	2.99872e-18
LOC106363404	50S ribosomal protein HLP	16.0415	3.06999e-18
LOC106349207	pentatricopeptide repeat-containing protein At3g02330-like	13.6312	4.23139e-18
LOC106400741	uncharacterized LOC106400741	3.17261	4.31965e-18
LOC106390487	cadmium/zinc-transporting ATPase HMA2-like	-2.12389	4.69369e-18
LOC106377836	lipoxygenase 2	3.27589	4.81541e-18
LOC106452361	uncharacterized LOC106452361	5.34469	5.17149e-18
LOC106386605	uncharacterized LOC106386605	-1.78651	5.27168e-18
LOC106372672	uncharacterized LOC106372672	2.55075	5.5092e-18
LOC106394709	uncharacterized LOC106394709	14.472	5.59986e-18
LOC106446093	laccase-13	4.26717	5.68233e-18
LOC106452222	uncharacterized LOC106452222	1.61239	6.13664e-18
LOC106452481	uncharacterized protein At3g43530-like	-1.01451	6.36566e-18
LOC106376342	uncharacterized LOC106376342	14.8233	6.75709e-18
LOC106409547	basic leucine zipper 43-like	-2.21116	6.79242e-18
LOC106447911	BTB/POZ and MATH domain-containing protein 4-like	-1.32432	7.54794e-18
LOC106404983	uncharacterized LOC106404983	2.69902	7.79166e-18
LOC106400946	twist-related protein 1-like	-9.26126	7.82883e-18
LOC106441757	uncharacterized LOC106441757	13.4928	8.43526e-18
LOC106405481	uncharacterized LOC106405481	-1.64126	8.74845e-18
LOC106382134	uncharacterized LOC106382134	-14.0165	8.92153e-18
LOC106372579	trafficking protein particle complex subunit 4-like	2.04543	8.98643e-18
LOC106386622	uncharacterized LOC106386622	6.85326	1.00377e-17
LOC106455070	uncharacterized LOC106455070	-15.7525	1.03411e-17
LOC106387111	glutathione gamma-glutamylcysteinyltransferase 1-like	2.36594	1.16916e-17
LOC106448143	uncharacterized LOC106448143	-14.6678	1.18716e-17
LOC106349124	uncharacterized LOC106349124	1.45348	1.19247e-17
LOC106366817	LOB domain-containing protein 41-like	2.60243	1.20342e-17
LOC106366424	histone H1	1.73318	1.26156e-17
LOC106447279	tropinone reductase homolog At2g29370-like	-2.60193	1.26191e-17
LOC106437935	uncharacterized LOC106437935	-4.43816	1.34287e-17
LOC106381781	uncharacterized LOC106381781	7.73434	1.40112e-17
LOC106451400	40S ribosomal protein S3-2-like	-1.24458	1.6031e-17
LOC106366029	kinesin-like protein KIF3C	1.62482	1.67029e-17
LOC106389762	dentin sialophosphoprotein-like	1.4045	1.85049e-17
LOC106400572	alkaline/neutral invertase C	-1.63571	1.89961e-17
LOC106400581	50S ribosomal protein L7/L12	-1.43446	1.93843e-17
LOC106352877	rab proteins geranylgeranyltransferase component A 2-like	-14.2988	2.09762e-17
LOC106345962	histone-lysine N-methyltransferase SUVR4-like	1.23216	2.17087e-17
LOC106364685	DNA-binding protein DDB_G0278111-like	1.97077	2.22615e-17
LOC106370729	uncharacterized LOC106370729	14.3498	2.23961e-17
LOC106387756	uncharacterized LOC106387756	2.28529	2.63788e-17
LOC106418134	histone-lysine N-methyltransferase SUVR3	14.9092	2.72737e-17
LOC106381927	uncharacterized LOC106381927	1.4248	2.80205e-17
LOC106397623	probable E3 ubiquitin ligase SUD1	-13.691	2.81337e-17
LOC106399975	uncharacterized LOC106399975	-1.65604	3.34274e-17
LOC106367111	uncharacterized LOC106367111	14.1178	3.8491e-17
LOC106449400	uncharacterized LOC106449400	-14.8114	4.00889e-17
LOC106349216	uncharacterized LOC106349216	1.99148	4.12556e-17
LOC106412439	uncharacterized LOC106412439	14.4193	4.16302e-17
LOC106367602	uncharacterized LOC106367602	2.22086	4.20631e-17
LOC106381389	uncharacterized LOC106381389	14.916	4.2268e-17
LOC106387979	epithiospecifier protein-like	2.32902	4.28642e-17
LOC106354683	neurofilament heavy polypeptide	-2.18092	4.88617e-17
LOC106382132	uncharacterized LOC106382132	-14.5965	5.32091e-17
LOC106390818	uncharacterized LOC106390818	-1.96603	5.32712e-17
LOC106379665	uncharacterized LOC106379665	14.8464	5.38138e-17
LOC106363248	zinc finger BED domain-containing protein RICESLEEPER 2-like	-13.7679	5.58138e-17
LOC106354788	ent-kaur-16-ene synthase	-2.17212	5.76371e-17
LOC106451497	uncharacterized LOC106451497	-4.75058	5.93165e-17
LOC106372419	protein OVEREXPRESSOR OF CATIONIC PEROXIDASE 3-like	1.56355	6.05364e-17
LOC106379043	phosphate transporter PHO1 homolog 5-like	1.30047	6.29982e-17
LOC106450532	phospholipase A(1) LCAT3	1.73786	6.34203e-17
LOC106400129	shaggy-related protein kinase gamma-like	-1.19897	6.54524e-17
LOC106345162	uncharacterized LOC106345162	15.0816	6.55365e-17
LOC106411792	dihydroneopterin aldolase 1-like	2.06656	6.72581e-17
LOC106405531	uncharacterized LOC106405531	13.7644	7.0193e-17
LOC106453035	uncharacterized LOC106453035	-15.0637	7.51573e-17
LOC106401076	uncharacterized LOC106401076	-1.42005	7.81422e-17
LOC106449553	dof zinc finger protein DOF3.1-like	1.4239	7.9251e-17
LOC106397087	protein DEHYDRATION-INDUCED 19 homolog 4-like	-8.42878	8.03559e-17
LOC106445318	uncharacterized LOC106445318	-9.39376	8.35625e-17
LOC106372614	uncharacterized LOC106372614	13.8311	1.08668e-16
LOC106372626	polyubiquitin	1.32057	1.11666e-16
LOC106377834	lipoxygenase 2	3.4196	1.14489e-16
LOC106381128	mediator of RNA polymerase II transcription subunit 23-like	1.05818	1.2922e-16
LOC106405811	geranylgeranyl diphosphate reductase	-1.63987	1.31204e-16
LOC106386773	uncharacterized LOC106386773	1.71887	1.37019e-16
LOC106389588	peptidyl-prolyl cis-trans isomerase FKBP10-like	-1.12986	1.48259e-16
LOC106451290	cytochrome b5 isoform B-like	1.61409	1.49586e-16
LOC106347321	uncharacterized LOC106347321	2.16284	1.5499e-16
LOC106370350	uncharacterized LOC106370350	7.65203	1.64861e-16
LOC106368838	uncharacterized LOC106368838	2.05612	1.66492e-16
LOC106386759	elongation factor 1-beta 2-like	1.55277	1.73078e-16
LOC106392105	uncharacterized LOC106392105	14.2415	1.92235e-16
LOC106438832	trafficking protein particle complex subunit 4-like	-2.40756	1.93671e-16
LOC106349919	uncharacterized LOC106349919	-13.4627	1.93878e-16
LOC106440568	uncharacterized LOC106440568	-15.6458	2.14306e-16
LOC106359854	uncharacterized LOC106359854	-5.40401	2.44161e-16
LOC106389811	uncharacterized LOC106389811	1.28516	2.73357e-16
LOC106418205	uncharacterized LOC106418205	15.1019	2.75223e-16
LOC106394995	uncharacterized LOC106394995	-5.43272	2.81661e-16
LOC106443064	uncharacterized LOC106443064	-16.6669	2.817e-16
LOC106397576	photosystem I reaction center subunit III	-1.33151	3.09911e-16
LOC106396863	uncharacterized LOC106396863	13.6012	3.10584e-16
LOC106400140	uncharacterized LOC106400140	-14.297	3.17781e-16
LOC106346104	INO80 complex subunit B-like	-14.2716	3.3386e-16
LOC106381979	glycine-rich RNA-binding protein 10-like	1.0583	3.39445e-16
LOC106354823	glutamic acid-rich protein-like	-1.74045	3.72952e-16
LOC106401075	uncharacterized LOC106401075	-2.05009	3.74797e-16
LOC106442611	uncharacterized LOC106442611	-15.7657	3.88689e-16
LOC106351533	uncharacterized LOC106351533	7.77161	4.04943e-16
LOC106452995	uncharacterized protein At3g06530-like	1.17496	4.69795e-16
LOC106381496	pre-mRNA-splicing factor CWC22 homolog	1.2438	4.80508e-16
LOC106387172	uncharacterized LOC106387172	2.13047	4.81386e-16
LOC106355888	lipoxygenase 2	2.26462	4.8653e-16
LOC106451432	uncharacterized LOC106451432	9.56082	5.83577e-16
LOC106354802	wall-associated receptor kinase-like 10	-2.778	6.12843e-16
LOC106405267	uncharacterized LOC106405267	1.97376	6.48388e-16
LOC106361246	E3 ubiquitin-protein ligase RING1-like	14.29	6.93786e-16
LOC106377300	uncharacterized LOC106377300	-8.74142	7.14826e-16
LOC106354681	probable gamma-glutamyl hydrolase 3	-14.5288	7.33158e-16
LOC106407686	uncharacterized LOC106407686	-1.98657	7.84416e-16
LOC106354599	UDP-galactose transporter 1-like	-3.07166	7.98412e-16
LOC106438833	E3 ubiquitin-protein ligase PRT6-like	-1.06143	8.73894e-16
LOC106372487	MADS-box protein FLOWERING LOCUS C-like	2.7194	1.03216e-15
LOC106415703	photosystem II reaction center W protein	-1.04134	1.05506e-15
LOC106346105	uncharacterized LOC106346105	-11.8836	1.17086e-15
LOC106395734	protein NRT1/ PTR FAMILY 5.12-like	3.24315	1.48757e-15
LOC106391463	uncharacterized protein At3g43530-like	-1.04135	1.74052e-15
LOC106440879	inositol oxygenase 4-like	2.35593	1.79365e-15
LOC106418461	probable galactinol--sucrose galactosyltransferase 1	1.72031	1.79603e-15
LOC106348746	glyoxysomal fatty acid beta-oxidation multifunctional protein MFP-a-like	1.70476	1.84878e-15
LOC106387409	oligopeptide transporter 1-like	2.50749	1.86633e-15
LOC106397621	uncharacterized LOC106397621	14.4763	2.28314e-15
LOC106349195	uncharacterized LOC106349195	1.42282	2.28973e-15
LOC106438778	V-type proton ATPase catalytic subunit A-like	-14.7591	2.44814e-15
LOC106387291	ultraviolet-B receptor UVR8-like	-1.17628	2.89225e-15
LOC106418691	ribosomal protein S2	2.09148	2.92983e-15
LOC106356004	pathogenesis-related protein 5-like	-14.7822	3.32773e-15
LOC106453050	formin-like protein 11	-1.50008	3.36309e-15
LOC106354264	kunitz-type serine protease inhibitor DrTI-like	1.50384	3.60645e-15
LOC106453045	protein ALWAYS EARLY 2	-1.13254	3.67222e-15
LOC106398816	pentatricopeptide repeat-containing protein At2g36980	3.61484	4.63133e-15
LOC106400539	proline-rich antigen homolog	-9.3133	4.80135e-15
LOC106397390	long chain acyl-CoA synthetase 6	-13.3884	4.85591e-15
LOC106409074	uncharacterized LOC106409074	14.4083	5.03842e-15
LOC106354773	thiosulfate/3-mercaptopyruvate sulfurtransferase 1	-2.84451	5.2669e-15
LOC106377353	CBL-interacting serine/threonine-protein kinase 9-like	-1.85025	5.31476e-15
LOC106383093	F-box protein CPR30-like	-1.48468	5.39815e-15
LOC106351695	arabinogalactan peptide 12-like	-1.07354	5.71819e-15
LOC106390964	cytochrome P450 81F1-like	3.21804	5.80644e-15
LOC106354658	amyrin synthase LUP2	-13.2593	6.00428e-15
LOC106346113	uncharacterized LOC106346113	-14.8715	6.38812e-15
LOC106450544	2-C-methyl-D-erythritol 2	1.77079	6.4764e-15
LOC106450784	nuclear pore complex protein NUP98B-like	1.29932	6.65702e-15
LOC106418167	serine/threonine protein phosphatase 2A regulatory subunit B''alpha	1.18779	7.17057e-15
LOC106353941	uncharacterized LOC106353941	2.87042	7.52274e-15
LOC106451330	transcription factor Pur-alpha 1-like	-1.07807	7.61695e-15
LOC106352282	probable tRNA (guanine(26)-N(2))-dimethyltransferase 2	-1.39143	8.25861e-15
LOC106359624	uncharacterized LOC106359624	-14.9692	9.36368e-15
LOC106452368	phosphoglycerate kinase 1	1.80082	9.86785e-15
LOC106452226	malonate--CoA ligase	1.38141	1.09127e-14
LOC106409014	uncharacterized LOC106409014	-1.6968	1.11443e-14
LOC106354263	kunitz-type serine protease inhibitor DrTI-like	1.62957	1.12417e-14
LOC106400537	proline-rich antigen homolog	-9.22667	1.17729e-14
LOC106366033	60S ribosomal protein L13-3-like	1.47833	1.18626e-14
LOC106387277	beta-catenin-like protein 1	-1.08414	1.20518e-14
LOC106371986	myosin-binding protein 3-like	1.62161	1.21724e-14
LOC106352823	serine/threonine-protein kinase WNK2-like	-3.25975	1.3944e-14
LOC106443234	uncharacterized LOC106443234	13.4576	1.41249e-14
LOC106386894	uncharacterized LOC106386894	6.66577	1.58947e-14
LOC106446051	uncharacterized LOC106446051	-1.7206	1.71225e-14
LOC106348750	protein DEHYDRATION-INDUCED 19 homolog 4-like	1.13731	1.74242e-14
LOC106354654	uncharacterized LOC106354654	-3.33844	1.80484e-14
LOC106401266	uncharacterized LOC106401266	-13.3217	1.85994e-14
LOC106354500	50S ribosomal protein L31	-1.37334	1.95552e-14
LOC106389827	uncharacterized LOC106389827	1.85439	2.00358e-14
LOC106390013	cytochrome P450 82C4	10.8318	2.05136e-14
LOC106376952	protein NRT1/ PTR FAMILY 7.2	-2.63839	2.10005e-14
LOC106451864	serine/threonine-protein kinase UCNL	-1.9936	2.1287e-14
LOC106387275	thioredoxin F-type	-1.3609	2.1451e-14
LOC106399364	uncharacterized LOC106399364	1.36206	2.54038e-14
LOC106371626	uncharacterized LOC106371626	14.0917	2.66348e-14
LOC106420416	uncharacterized LOC106420416	-13.877	2.78122e-14
LOC106387174	phototropin-2-like	-1.52435	2.79427e-14
LOC106366310	subtilisin-like protease SBT1.7	4.04308	2.9192e-14
LOC106372576	E3 ubiquitin-protein ligase PRT6-like	1.17166	3.03545e-14
LOC106345435	uncharacterized LOC106345435	-14.2016	3.18375e-14
LOC106410328	probable pectate lyase 8	-1.44169	3.38562e-14
LOC106366420	zinc finger CCCH domain-containing protein 44-like	1.03414	3.58362e-14
LOC106393665	protein SIEVE ELEMENT OCCLUSION B	-1.64424	3.63308e-14
LOC106382553	uncharacterized LOC106382553	-5.43466	3.64146e-14
LOC106445286	uncharacterized LOC106445286	1.00482	3.7389e-14
LOC106401780	26S protease regulatory subunit 6A homolog	-1.02068	3.81522e-14
LOC106371989	glutathione S-transferase DHAR3	1.20744	3.87815e-14
LOC106433437	putative ankyrin repeat protein RF_0381	-13.4386	3.98374e-14
LOC106354836	F-box/LRR-repeat protein 2-like	-4.23241	4.01819e-14
LOC106368587	cycloeucalenol cycloisomerase-like	-1.77634	4.1037e-14
LOC106364664	uncharacterized LOC106364664	13.8802	4.12926e-14
LOC106377301	uncharacterized LOC106377301	-14.1309	4.25172e-14
LOC106400538	proline-rich antigen homolog	-9.84934	4.72401e-14
LOC106391653	uncharacterized LOC106391653	13.2836	4.93324e-14
LOC106381778	uncharacterized LOC106381778	-13.5175	5.10356e-14
LOC106415591	protein NRT1/ PTR FAMILY 6.3-like	1.29804	5.21266e-14
LOC106350186	uncharacterized LOC106350186	14.4257	5.37648e-14
LOC106397783	uncharacterized LOC106397783	-2.6013	5.42665e-14
LOC106385195	uncharacterized LOC106385195	16.503	5.4689e-14
LOC106381782	GDSL esterase/lipase At5g45960-like	1.40721	5.72187e-14
LOC106368836	uncharacterized LOC106368836	1.57154	6.51328e-14
LOC106393974	glutamate receptor 2.8-like	-1.43796	6.52703e-14
LOC106443063	uncharacterized LOC106443063	-14.3201	6.7929e-14
LOC106381757	uncharacterized LOC106381757	-13.2351	7.2665e-14
LOC106372577	myb-related protein 3R-1-like	3.01137	7.28323e-14
LOC106385519	myb-related protein B-like	3.39554	7.61731e-14
LOC106348844	uncharacterized LOC106348844	1.16009	7.78887e-14
LOC106450538	U-box domain-containing protein 7	1.7579	7.9227e-14
LOC106345559	uncharacterized LOC106345559	-14.6981	8.43886e-14
LOC106380594	peroxisomal (S)-2-hydroxy-acid oxidase GLO3-like	-13.9993	9.22586e-14
LOC106378806	WUSCHEL-related homeobox 4-like	-1.26756	9.62704e-14
LOC106354677	F-box/LRR-repeat protein 13-like	-13.4465	1.02041e-13
LOC106453070	WEB family protein At5g16730	1.44272	1.06078e-13
LOC106445135	uncharacterized LOC106445135	14.0765	1.08852e-13
LOC106366814	40S ribosomal protein S7	1.37439	1.22856e-13
LOC106387278	WAT1-related protein At3g02690	-1.43717	1.29935e-13
LOC106402421	uncharacterized LOC106402421	1.29626	1.38078e-13
LOC106437933	uncharacterized LOC106437933	-3.07644	1.39453e-13
LOC106385973	symplekin-like	-13.4469	1.43422e-13
LOC106451128	pentatricopeptide repeat-containing protein At2g36240-like	1.53922	1.66756e-13
LOC106451762	disease resistance protein RPM1-like	-12.5506	1.84818e-13
LOC106382416	3-oxoacyl-[acyl-carrier-protein] reductase FabG-like	-2.27906	1.85015e-13
LOC106367140	probable magnesium transporter NIPA8	1.48042	1.89022e-13
LOC106370192	uncharacterized LOC106370192	13.8752	1.91459e-13
LOC106372578	probable serine/threonine-protein kinase NAK	2.69419	1.9415e-13
LOC106366843	mitochondrial carnitine/acylcarnitine carrier-like protein	2.02354	1.97011e-13
LOC106444819	NADH dehydrogenase [ubiquinone] iron-sulfur protein 4	1.19464	2.01633e-13
LOC106447123	histone-lysine N-methyltransferase ASHR2-like	1.70478	2.05217e-13
LOC106452374	uncharacterized LOC106452374	5.77767	2.07872e-13
LOC106354666	V-type proton ATPase catalytic subunit A-like	-8.51888	2.08997e-13
LOC106400580	uncharacterized GPI-anchored protein At3g06035	-2.311	2.11974e-13
LOC106452359	uncharacterized LOC106452359	14.0961	2.15343e-13
LOC106406813	uncharacterized LOC106406813	1.57156	2.33227e-13
LOC106404184	probable tRNA (guanine(26)-N(2))-dimethyltransferase 2	-1.35952	2.42469e-13
LOC106367635	50S ribosomal protein HLP	14.283	2.51245e-13
LOC106454892	uncharacterized LOC106454892	13.7559	2.57545e-13
LOC106446113	SNAP25 homologous protein SNAP33-like	1.48064	2.63913e-13
LOC106452364	peroxisomal 2	1.31966	2.71193e-13
LOC106382176	protein RIK-like	1.05529	2.85463e-13
LOC106381515	uncharacterized protein At3g43530-like	-1.05296	2.90966e-13
LOC106435383	uncharacterized LOC106435383	2.77837	3.06154e-13
LOC106389638	receptor-like protein kinase HSL1	-1.07738	3.2102e-13
LOC106372374	calcium-dependent protein kinase 7-like	1.34506	3.38469e-13
LOC106359825	lamin-like protein	-1.1788	3.53853e-13
LOC106448943	uncharacterized LOC106448943	12.9794	3.65508e-13
LOC106403142	uncharacterized LOC106403142	1.52252	3.68352e-13
LOC106409325	uncharacterized LOC106409325	-4.583	3.70891e-13
LOC106383239	F-box protein CPR30-like	-1.27141	3.93309e-13
LOC106404501	autophagy-related protein 8i	-1.46167	3.9923e-13
LOC106379367	uncharacterized LOC106379367	-3.62011	4.05453e-13
LOC106449544	uncharacterized LOC106449544	-14.6394	4.30127e-13
LOC106387192	diacylglycerol kinase 4	-4.44912	4.38541e-13
LOC106362628	zinc finger BED domain-containing protein DAYSLEEPER-like	-1.15776	4.39783e-13
LOC106379190	uncharacterized LOC106379190	-15.2701	4.5196e-13
LOC106445717	TSK-associating protein 1-like	1.32906	4.62615e-13
LOC106346110	protein DEHYDRATION-INDUCED 19 homolog 4-like	-10.1528	5.07008e-13
LOC106356801	uncharacterized LOC106356801	8.79754	5.37335e-13
LOC106397764	uncharacterized LOC106397764	-2.53602	5.63012e-13
LOC106369306	uncharacterized LOC106369306	-14.1858	5.73175e-13
LOC106354690	NADH kinase-like	-13.6327	5.83053e-13
LOC106387187	shikimate O-hydroxycinnamoyltransferase-like	1.51286	6.21979e-13
LOC106372417	6-hydroxynicotinate 3-monooxygenase-like	1.74966	6.55095e-13
LOC106371066	uncharacterized LOC106371066	-1.41781	6.71526e-13
LOC106370507	ADP-ribosylation factor-like	3.52909	6.74215e-13
LOC106397068	leucine-rich repeat receptor-like serine/threonine-protein kinase At2g14510	-1.77933	6.84083e-13
LOC106438075	ribulose bisphosphate carboxylase/oxygenase activase	-1.03135	6.91513e-13
LOC106345633	60S ribosomal protein L29-1-like	1.16751	7.03313e-13
LOC106384728	glutathione S-transferase T3-like	14.4927	7.20565e-13
LOC106384612	uncharacterized LOC106384612	1.31657	8.52582e-13
LOC106453054	GDSL esterase/lipase At3g05180-like	1.38747	8.54167e-13
LOC106454893	uncharacterized LOC106454893	14.0076	8.57087e-13
LOC106401886	protein trichome birefringence-like 10	-1.43486	8.63459e-13
LOC106452198	kinesin-13A-like	1.04665	8.87616e-13
LOC106366815	cyclin-B1-2-like	14.261	9.19498e-13
LOC106450989	uncharacterized LOC106450989	1.17817	9.37834e-13
LOC106370222	uncharacterized LOC106370222	13.8	9.88715e-13
LOC106345635	bifunctional L-3-cyanoalanine synthase/cysteine synthase D1-like	-1.50876	1.00133e-12
LOC106406816	uncharacterized LOC106406816	1.47964	1.02349e-12
LOC106397664	aspartate carbamoyltransferase	13.1479	1.05e-12
LOC106347169	uncharacterized LOC106347169	1.36181	1.05247e-12
LOC106389636	OPA3-like protein	-1.36238	1.06934e-12
LOC106445277	AT-hook motif nuclear-localized protein 14-like	1.00225	1.11254e-12
LOC106451543	peptide chain release factor PrfB1	1.21808	1.13046e-12
LOC106382964	UDP-glycosyltransferase 76C4-like	-2.48492	1.14355e-12
LOC106415796	scarecrow-like protein 5	-3.51378	1.27716e-12
LOC106403141	uncharacterized LOC106403141	1.40909	1.2841e-12
LOC106359784	uncharacterized LOC106359784	-13.6048	1.34017e-12
LOC106406657	uncharacterized protein At1g04910-like	1.72088	1.36198e-12
LOC106397015	hydrophobic protein RCI2A-like	-3.48824	1.36834e-12
LOC106399475	uncharacterized LOC106399475	4.68679	1.41988e-12
LOC106370707	wall-associated receptor kinase-like 20	3.4931	1.45567e-12
LOC106379602	probable ubiquitin-conjugating enzyme E2 26	1.98554	1.51937e-12
LOC106384874	tyrosine aminotransferase	1.2689	1.56692e-12
LOC106417731	uncharacterized LOC106417731	4.25399	1.74307e-12
LOC106454439	mitochondrial inner membrane protease ATP23	-13.9315	1.78734e-12
LOC106453022	DNA ligase 1-like	-6.77072	1.80771e-12
LOC106369144	E3 ubiquitin-protein ligase RING1-like	-1.11283	1.85996e-12
LOC106453069	acyl carrier protein	1.0253	1.86279e-12
LOC106389631	uncharacterized LOC106389631	-13.008	1.88664e-12
LOC106451272	uncharacterized LOC106451272	1.82961	2.08813e-12
LOC106372424	probable sugar phosphate/phosphate translocator At5g25400	1.32886	2.0918e-12
LOC106415543	GTPase Der-like	1.3764	2.18751e-12
LOC106447595	uncharacterized LOC106447595	1.54364	2.19269e-12
LOC106454087	uncharacterized LOC106454087	12.277	2.22333e-12
LOC106451746	CSC1-like protein At1g32090	-1.3044	2.22736e-12
LOC106385470	uncharacterized LOC106385470	-5.56106	2.61315e-12
LOC106383346	protein crooked neck-like	1.53395	2.77259e-12
LOC106453009	uncharacterized LOC106453009	-14.1184	2.83894e-12
LOC106410100	callose synthase 3	1.62115	2.84154e-12
LOC106452339	WEB family protein At3g13190-like	1.23213	3.1467e-12
LOC106450917	myosin-7-like	1.10287	3.17344e-12
LOC106389572	uncharacterized LOC106389572	-1.18307	3.36308e-12
LOC106399724	L-Ala-D/L-amino acid epimerase-like	-9.05367	3.43143e-12
LOC106351890	uncharacterized LOC106351890	15.045	3.4878e-12
LOC106381960	uncharacterized LOC106381960	-3.5796	3.66401e-12
LOC106453013	uncharacterized LOC106453013	-14.1338	3.72122e-12
LOC106367391	putative zinc finger CCCH domain-containing protein 10	-12.9519	3.72557e-12
LOC106378415	auxin-responsive protein IAA9-like	-14.9971	3.8499e-12
LOC106399606	uncharacterized LOC106399606	8.56945	3.85364e-12
LOC106416684	pentatricopeptide repeat-containing protein At3g03580-like	3.0003	3.92656e-12
LOC106454977	ABC transporter G family member 24-like	-4.87466	4.17253e-12
LOC106391225	glutamate receptor 2.8-like	-2.07772	4.43095e-12
LOC106364767	uncharacterized LOC106364767	1.72891	4.55798e-12
LOC106397193	uncharacterized LOC106397193	1.96184	4.65607e-12
LOC106451401	probable glutathione peroxidase 2	-2.04917	4.81999e-12
LOC106346315	phosphoenolpyruvate carboxylase kinase 1	-1.09912	4.86567e-12
LOC106454298	uncharacterized LOC106454298	-5.05126	5.02973e-12
LOC106370694	alpha carbonic anhydrase 3-like	-2.73893	5.037e-12
LOC106444036	auxin-responsive protein IAA19-like	-2.65597	5.37276e-12
LOC106372160	biotin carboxyl carrier protein of acetyl-CoA carboxylase 2	1.87323	5.56248e-12
LOC106354421	protein SET DOMAIN GROUP 40-like	1.34002	5.72262e-12
LOC106359474	uncharacterized LOC106359474	-14.2689	5.73149e-12
LOC106447675	non-specific lipid-transfer protein A-like	-1.9477	5.79901e-12
LOC106402927	probable ubiquitin-conjugating enzyme E2 25	1.69692	5.80012e-12
LOC106453773	uncharacterized LOC106453773	12.766	5.82139e-12
LOC106368001	HAUS augmin-like complex subunit 3	-1.04129	6.03818e-12
LOC106366801	aspartic proteinase-like protein 2	5.8214	6.45501e-12
LOC106349206	UDP-arabinopyranose mutase 1-like	1.29262	6.58926e-12
LOC106352799	uncharacterized LOC106352799	-7.6604	6.7766e-12
LOC106451119	host cell factor-like	1.29847	6.91275e-12
LOC106361298	prolyl 4-hydroxylase 5-like	3.18749	6.91992e-12
LOC106350340	U-box domain-containing protein 18-like	2.35546	7.16632e-12
LOC106450744	CSC1-like protein At1g11960	-3.43345	7.92504e-12
LOC106441544	20 kDa chaperonin	-14.3809	7.93511e-12
LOC106443593	uncharacterized LOC106443593	-14.8003	8.10831e-12
LOC106354572	endoplasmic reticulum-Golgi intermediate compartment protein 3-like	-13.1946	8.41435e-12
LOC106451759	uncharacterized vacuolar membrane protein YML018C-like	-13.3146	8.50105e-12
LOC106440437	B3 domain-containing protein REM9-like	-13.1969	8.54014e-12
LOC106400536	thioredoxin-like protein CITRX	-2.1421	8.80084e-12
LOC106416625	uncharacterized LOC106416625	13.4512	9.2796e-12
LOC106393159	uncharacterized LOC106393159	1.41013	9.5259e-12
LOC106453087	pentatricopeptide repeat-containing protein At3g04750	1.67192	9.64206e-12
LOC106410780	uncharacterized LOC106410780	-13.9543	9.99452e-12
LOC106415469	40S ribosomal protein S5-1-like	1.07199	1.00327e-11
LOC106431372	glutaredoxin-C8-like	4.25508	1.04617e-11
LOC106367129	pentatricopeptide repeat-containing protein At1g32415	1.93911	1.0546e-11
LOC106387750	cation/calcium exchanger 2-like	5.11115	1.09665e-11
LOC106385587	uncharacterized LOC106385587	13.1583	1.18032e-11
LOC106354689	NADH kinase-like	-13.2375	1.22191e-11
LOC106397655	ATP-dependent DNA helicase Q-like 1	-2.1777	1.22524e-11
LOC106450289	aquaporin NIP2-1	-14.4838	1.24058e-11
LOC106364650	uncharacterized LOC106364650	13.012	1.2461e-11
LOC106389696	guanine nucleotide-binding protein-like NSN1	1.16059	1.26308e-11
LOC106369087	pathogenesis-related protein 5-like	1.60746	1.27698e-11
LOC106382604	uncharacterized LOC106382604	1.22304	1.32188e-11
LOC106365619	uncharacterized LOC106365619	1.17385	1.40279e-11
LOC106408958	extensin-like	13.1199	1.5333e-11
LOC106345182	uncharacterized LOC106345182	1.94052	1.56689e-11
LOC106382534	uncharacterized LOC106382534	1.06829	1.60786e-11
LOC106352292	uncharacterized protein At4g02000-like	4.54819	1.61134e-11
LOC106440597	uncharacterized LOC106440597	-1.06296	1.61828e-11
LOC106451726	calmodulin-binding transcription activator 2-like	3.13126	1.63041e-11
LOC106416623	uncharacterized LOC106416623	12.2998	1.65469e-11
LOC106451042	xylosyltransferase 1-like	1.17798	1.71142e-11
LOC106360175	L-Ala-D/L-amino acid epimerase-like	-8.02899	1.74342e-11
LOC106345639	uncharacterized LOC106345639	-14.8615	1.80141e-11
LOC106348911	glutamic acid-rich protein-like	1.54581	1.80358e-11
LOC106439438	aquaporin TIP2-1-like	-1.4764	1.84314e-11
LOC106353636	methionine adenosyltransferase 2 subunit beta-like	1.13554	1.92262e-11
LOC106372362	uncharacterized LOC106372362	-1.00184	1.97727e-11
LOC106370646	probable glucuronokinase 2	13.4009	1.99489e-11
LOC106451760	desumoylating isopeptidase 1-like	-8.46917	2.04682e-11
LOC106451346	importin beta-like SAD2	-1.20123	2.05969e-11
LOC106450022	uncharacterized LOC106450022	1.96783	2.13476e-11
LOC106371466	ATP-dependent 6-phosphofructokinase 7	1.16515	2.19242e-11
LOC106386712	uncharacterized LOC106386712	1.23749	2.21624e-11
LOC106399101	serine/threonine-protein phosphatase 4 regulatory subunit 3-like	-13.3461	2.22784e-11
LOC106427158	uncharacterized LOC106427158	-2.33993	2.42874e-11
LOC106352619	uncharacterized LOC106352619	-13.9459	2.43423e-11
LOC106350869	probable tRNA (guanine(26)-N(2))-dimethyltransferase 2	13.1468	2.4453e-11
LOC106354550	alpha	1.01631	2.59073e-11
LOC106372621	protein phosphatase 2C 70-like	2.8857	2.71581e-11
LOC106351060	peroxisome biogenesis protein 12	1.78067	2.73286e-11
LOC106401302	protein NRT1/ PTR FAMILY 6.3-like	1.02575	2.74624e-11
LOC106389566	nuclear transport factor 2-like	1.43425	2.78022e-11
LOC106399381	60S ribosomal protein L18-2-like	-2.48108	2.85056e-11
LOC106401646	probable xyloglucan endotransglucosylase/hydrolase protein 8	-1.19898	2.98112e-11
LOC106416538	ELMO domain-containing protein A-like	12.8619	3.27455e-11
LOC106365836	uncharacterized LOC106365836	5.94415	3.34121e-11
LOC106360599	uncharacterized LOC106360599	1.11909	3.34168e-11
LOC106390579	probable LRR receptor-like serine/threonine-protein kinase At3g47570	1.36451	3.354e-11
LOC106390501	glycine-rich RNA-binding protein 2	1.02007	3.36766e-11
LOC106400867	uncharacterized LOC106400867	3.84206	3.43046e-11
LOC106452310	uncharacterized LOC106452310	1.30974	3.55499e-11
LOC106368830	myosin-13-like	1.12477	3.57199e-11
LOC106366819	mitochondrial carnitine/acylcarnitine carrier-like protein	1.67651	3.57259e-11
LOC106360960	uncharacterized LOC106360960	4.3932	3.61998e-11
LOC106401176	protein MODIFIER OF SNC1 11-like	1.15186	3.62263e-11
LOC106402419	uncharacterized LOC106402419	1.34421	3.68359e-11
LOC106372746	sister chromatid cohesion 1 protein 2-like	1.16709	3.69201e-11
LOC106406761	uncharacterized LOC106406761	1.24124	3.70639e-11
LOC106382621	uncharacterized protein sll0005-like	2.26534	3.70904e-11
LOC106382607	two-component response regulator-like APRR5	1.10479	3.7651e-11
LOC106364782	uncharacterized LOC106364782	-2.00611	3.86774e-11
LOC106401764	LOB domain-containing protein 25-like	1.16383	3.91314e-11
LOC106448347	sulfate transporter 3.1-like	-1.40039	4.11044e-11
LOC106452998	alkaline/neutral invertase C	1.06316	4.14243e-11
LOC106346115	60S ribosomal protein L29-1-like	-9.31099	4.33295e-11
LOC106453648	disease resistance protein LAZ5-like	12.5635	4.49899e-11
LOC106354428	nitrilase 2-like	1.49133	4.54846e-11
LOC106384672	putative geranylgeranyl pyrophosphate synthase 8	-13.8285	4.59727e-11
LOC106370274	uncharacterized LOC106370274	8.54369	4.61108e-11
LOC106391585	cytochrome P450 81F1-like	2.89493	5.04879e-11
LOC106453058	myosin-7-like	1.12803	5.07736e-11
LOC106389885	probable UDP-arabinose 4-epimerase 3	-12.8086	5.30137e-11
LOC106387279	WAT1-related protein At3g02690	-1.32236	5.3109e-11
LOC106348300	uncharacterized LOC106348300	13.0713	5.64296e-11
LOC106453350	dehydrogenase/reductase SDR family member 7-like	1.39217	6.01729e-11
LOC106387280	uncharacterized LOC106387280	-1.0133	6.12168e-11
LOC106353767	transcription factor bHLH96-like	1.02616	6.13996e-11
LOC106382110	uncharacterized LOC106382110	-1.44215	6.2811e-11
LOC106386565	disease resistance protein TAO1-like	-11.3524	6.29346e-11
LOC106452212	uncharacterized LOC106452212	13.6171	6.6185e-11
LOC106452981	probable histone-arginine methyltransferase 1.3	1.09995	6.63528e-11
LOC106399980	uncharacterized LOC106399980	-12.8218	6.99671e-11
LOC106391383	beta-glucosidase 42-like	1.22108	7.27337e-11
LOC106364396	uncharacterized LOC106364396	-15.1773	7.44724e-11
LOC106379674	uncharacterized LOC106379674	13.7742	7.64843e-11
LOC106368392	uncharacterized LOC106368392	1.12384	7.66819e-11
LOC106381597	uncharacterized LOC106381597	1.02778	7.69527e-11
LOC106443236	pyruvate kinase	1.85644	8.9478e-11
LOC106454682	uncharacterized LOC106454682	1.60301	9.62845e-11
LOC106443845	uncharacterized LOC106443845	-13.5921	9.77436e-11
LOC106381700	cyclin-T1-5-like	1.21172	9.8406e-11
LOC106450623	basic leucine zipper 34	-1.84444	9.97253e-11
LOC106400535	thioredoxin-like protein CITRX	-1.53437	1.00063e-10
LOC106345254	uncharacterized LOC106345254	2.16122	1.00411e-10
LOC106402295	importin subunit alpha-7	-2.79957	1.01936e-10
LOC106451793	putative F-box protein At2g02030	1.59536	1.02709e-10
LOC106452235	G-type lectin S-receptor-like serine/threonine-protein kinase CES101	1.67175	1.03533e-10
LOC106413513	clumping factor B-like	-1.01417	1.04147e-10
LOC106393657	protein SIEVE ELEMENT OCCLUSION B	-1.49626	1.06297e-10
LOC106402482	UPF0725 protein EMB2204-like	1.04178	1.06584e-10
LOC106402116	transmembrane protein 184A	-1.35709	1.14527e-10
LOC106364121	nucleolin-like	4.44933	1.14945e-10
LOC106402966	uncharacterized LOC106402966	-1.73811	1.15731e-10
LOC106402124	60S ribosomal protein L18-2-like	-13.5932	1.37968e-10
LOC106453094	protein WVD2-like 1	1.08773	1.4695e-10
LOC106451821	NAC domain-containing protein 17-like	1.518	1.5182e-10
LOC106393587	uncharacterized LOC106393587	3.98548	1.5415e-10
LOC106452100	pto-interacting protein 1-like	1.49093	1.57179e-10
LOC106418228	uncharacterized LOC106418228	1.00933	1.57991e-10
LOC106435351	uncharacterized LOC106435351	1.29337	1.78093e-10
LOC106443888	MATH domain-containing protein At5g43560-like	12.7232	1.79492e-10
LOC106453072	uncharacterized LOC106453072	1.06736	1.83199e-10
LOC106355313	uncharacterized LOC106355313	-13.2694	1.90878e-10
LOC106455044	uncharacterized LOC106455044	-12.2946	1.96433e-10
LOC106414848	uncharacterized LOC106414848	12.8507	1.9733e-10
LOC106410303	ATP sulfurylase 4	1.82866	2.0009e-10
LOC106443829	uncharacterized LOC106443829	8.34365	2.0018e-10
LOC106379716	uncharacterized LOC106379716	-7.82806	2.04436e-10
LOC106381300	proton pump-interactor 1-like	1.17377	2.18374e-10
LOC106455005	protein disulfide-isomerase 5-3-like	1.65927	2.30103e-10
LOC106370906	uncharacterized LOC106370906	4.88498	2.35256e-10
LOC106381125	putative caffeoyl-CoA O-methyltransferase At1g67980	1.97268	2.40147e-10
LOC106385926	RNA-directed DNA polymerase homolog	12.9591	2.5026e-10
LOC106356350	uncharacterized LOC106356350	-2.50021	2.64326e-10
LOC106370721	60S ribosomal protein L35-4-like	1.55579	2.73577e-10
LOC106385190	probable phytol kinase 2	2.33272	2.7875e-10
LOC106450533	uncharacterized LOC106450533	1.01552	2.84836e-10
LOC106451270	uncharacterized LOC106451270	-1.24349	2.86073e-10
LOC106387303	RING-H2 finger protein ATL51-like	-2.4314	2.86548e-10
LOC106381674	disease resistance RPP13-like protein 4	-2.0741	2.92635e-10
LOC106385585	osmotin-like protein OSM34	1.11386	2.94788e-10
LOC106348465	uncharacterized LOC106348465	-13.3738	3.09149e-10
LOC106453080	DNA-damage-repair/toleration protein DRT102-like	1.35669	3.13904e-10
LOC106442067	oligopeptide transporter 7-like	1.53664	3.22289e-10
LOC106381293	uncharacterized LOC106381293	1.05934	3.43624e-10
LOC106452241	uncharacterized LOC106452241	-1.1455	3.4745e-10
LOC106454649	non-specific lipid-transfer protein A-like	-2.65922	3.63806e-10
LOC106449543	uncharacterized LOC106449543	-13.7524	3.65056e-10
LOC106392161	alcohol dehydrogenase class-P-like	-2.02607	3.65999e-10
LOC106366368	probable protein S-acyltransferase 23	1.12023	3.73889e-10
LOC106403023	uncharacterized LOC106403023	1.55983	3.84226e-10
LOC106380660	uncharacterized LOC106380660	-14.0294	3.95622e-10
LOC106366419	uncharacterized LOC106366419	1.33126	3.98511e-10
LOC106390057	NADPH--cytochrome P450 reductase 2-like	-7.68873	4.0341e-10
LOC106345401	mini-ribonuclease 3-like	1.25579	4.20656e-10
LOC106368908	protein BRASSINAZOLE-RESISTANT 2-like	-2.35125	4.23929e-10
LOC106404546	ubiquitin-conjugating enzyme E2 20	1.02288	4.25507e-10
LOC106453059	gibberellin receptor GID1A	1.03005	4.26725e-10
LOC106405411	ESCRT-related protein CHMP1B	13.1774	4.3726e-10
LOC106438580	uncharacterized LOC106438580	1.06154	5.14254e-10
LOC106377749	cytosolic sulfotransferase 18-like	12.8023	5.16621e-10
LOC106404969	uncharacterized LOC106404969	12.1786	5.47351e-10
LOC106431277	alpha-mannosidase-like	13.8063	5.63132e-10
LOC106445189	probable LRR receptor-like serine/threonine-protein kinase At1g56140	1.36631	5.67432e-10
LOC106426682	uncharacterized LOC106426682	-11.3559	5.77535e-10
LOC106452827	oxysterol-binding protein-related protein 3B	1.30217	5.77999e-10
LOC106396525	transcription factor TCP21-like	1.43472	5.92492e-10
LOC106413316	transmembrane protein 53-like	1.77884	5.96781e-10
LOC106389694	sterol 3-beta-glucosyltransferase UGT80A2-like	1.1266	6.19977e-10
LOC106349184	uncharacterized LOC106349184	-1.18301	6.22678e-10
LOC106347544	probable inactive L-type lectin-domain containing receptor kinase III.1	14.1769	6.25725e-10
LOC106359772	uncharacterized LOC106359772	-3.04142	6.40018e-10
LOC106451656	protein LHCP TRANSLOCATION DEFECT-like	-1.70062	6.79222e-10
LOC106390667	uncharacterized LOC106390667	1.19858	6.81935e-10
LOC106397840	uncharacterized LOC106397840	-4.17554	6.97056e-10
LOC106453875	uncharacterized LOC106453875	12.9894	6.99356e-10
LOC106452111	uncharacterized LOC106452111	-14.0223	7.5255e-10
LOC106390073	U-box domain-containing protein 56-like	2.84141	7.69454e-10
LOC106400930	BTB/POZ and MATH domain-containing protein 2-like	-1.29292	7.72305e-10
LOC106451321	protein usf-like	1.68812	7.75163e-10
LOC106451608	trifunctional UDP-glucose 4	1.12215	7.84688e-10
LOC106350390	uncharacterized LOC106350390	-1.22536	8.13603e-10
LOC106379382	uncharacterized LOC106379382	8.5255	8.28488e-10
LOC106352145	uncharacterized LOC106352145	-1.11595	8.28891e-10
LOC106348913	cyclin-C1-1-like	1.19124	8.34106e-10
LOC106345990	putative lipid-transfer protein DIR1	2.18826	8.43388e-10
LOC106450735	uncharacterized LOC106450735	-2.29593	8.52704e-10
LOC106400369	serine/threonine-protein kinase mph1-like	1.07401	9.01462e-10
LOC106353524	uncharacterized LOC106353524	1.00533	9.03042e-10
LOC106416217	uncharacterized LOC106416217	1.13127	9.09612e-10
LOC106353536	ocs element-binding factor 1-like	1.15849	1.00701e-09
LOC106453193	zinc finger CCCH domain-containing protein 33-like	1.15031	1.01924e-09
LOC106349218	uncharacterized LOC106349218	-1.03231	1.03417e-09
LOC106354799	serine/threonine-protein kinase BLUS1-like	1.47058	1.0651e-09
LOC106372157	MATH domain and coiled-coil domain-containing protein At3g58210-like	1.12391	1.13843e-09
LOC106362980	uncharacterized LOC106362980	12.8693	1.16307e-09
LOC106348745	uncharacterized LOC106348745	1.85455	1.1859e-09
LOC106351539	serine/threonine-protein phosphatase 2A 65 kDa regulatory subunit A alpha isoform-like	-1.0162	1.18905e-09
LOC106370718	phosphatidylinositol N-acetylglucosaminyltransferase gpi3 subunit-like	1.72827	1.23694e-09
LOC106451757	protein transport protein Sec24-like At3g07100	-6.92058	1.26842e-09
LOC106349182	uncharacterized LOC106349182	-1.17923	1.27598e-09
LOC106346093	INO80 complex subunit B-like	1.15776	1.30417e-09
LOC106387004	uncharacterized LOC106387004	1.39513	1.32102e-09
LOC106389810	uncharacterized LOC106389810	-13.4038	1.39005e-09
LOC106454104	putative DUF21 domain-containing protein At3g13070	1.22053	1.40669e-09
LOC106442670	kinesin-like protein KIN12B	5.3688	1.45169e-09
LOC106375020	uncharacterized LOC106375020	2.1269	1.50159e-09
LOC106386690	uncharacterized LOC106386690	2.43403	1.50176e-09
LOC106400131	myosin-11	-1.25948	1.55826e-09
LOC106451723	uncharacterized LOC106451723	1.40362	1.6292e-09
LOC106346096	multiple organellar RNA editing factor 3	1.05292	1.66709e-09
LOC106403712	lipoxygenase 2	3.81628	1.66834e-09
LOC106404945	uncharacterized LOC106404945	2.60263	1.72421e-09
LOC106451635	probable LRR receptor-like serine/threonine-protein kinase At1g51880	11.3306	1.74177e-09
LOC106352327	uncharacterized LOC106352327	13.8505	1.74547e-09
LOC106387397	phosphoinositide phospholipase C 4-like	-1.62855	1.7756e-09
LOC106451084	uncharacterized LOC106451084	1.20003	1.78265e-09
LOC106390185	probable glutathione peroxidase 2	-1.27443	1.78585e-09
LOC106354604	uncharacterized LOC106354604	-11.3833	1.85497e-09
LOC106451127	protein ABSCISIC ACID-INSENSITIVE 5	-1.09324	1.87106e-09
LOC106447494	pentatricopeptide repeat-containing protein At2g34400-like	1.84167	1.88223e-09
LOC106416405	G-type lectin S-receptor-like serine/threonine-protein kinase CES101	1.93182	1.89738e-09
LOC106418692	protein TRI1-like	1.1733	1.96288e-09
LOC106346107	ubiquitin-like-specific protease 1A	1.05025	1.99696e-09
LOC106372667	uncharacterized LOC106372667	1.66146	2.03541e-09
LOC106452225	protein NRT1/ PTR FAMILY 1.1-like	1.35692	2.05987e-09
LOC106377952	midasin-like	1.30249	2.06908e-09
LOC106357368	centromere protein X	-13.62	2.11092e-09
LOC106371955	myosin-binding protein 3-like	1.12578	2.11114e-09
LOC106445734	uncharacterized LOC106445734	-3.98368	2.21574e-09
LOC106381822	COP9 signalosome complex subunit 3-like	1.39544	2.22372e-09
LOC106451761	guanine nucleotide-binding protein-like NSN1	-6.30084	2.25412e-09
LOC106417632	auxin-responsive protein IAA19-like	-1.659	2.29695e-09
LOC106402947	uncharacterized LOC106402947	-1.69747	2.32942e-09
LOC106450801	probable serine/threonine-protein kinase At5g41260	1.05014	2.34664e-09
LOC106385162	uncharacterized LOC106385162	1.2576	2.44111e-09
LOC106452911	uncharacterized LOC106452911	1.11081	2.48212e-09
LOC106376662	ADP	1.02375	2.50875e-09
LOC106401219	palmitoyl-monogalactosyldiacylglycerol delta-7 desaturase	-1.0549	2.56761e-09
LOC106451302	protein FAR1-RELATED SEQUENCE 2-like	1.56305	2.62513e-09
LOC106381966	uncharacterized LOC106381966	-1.28757	2.62664e-09
LOC106387007	uncharacterized LOC106387007	1.82347	2.64792e-09
LOC106353198	probable LRR receptor-like serine/threonine-protein kinase At1g56140	1.26002	2.65342e-09
LOC106381124	putative caffeoyl-CoA O-methyltransferase At1g67980	1.808	2.74253e-09
LOC106445023	uncharacterized LOC106445023	7.1135	2.76337e-09
LOC106435390	T-complex protein 1 subunit theta	1.42798	2.77613e-09
LOC106397609	uncharacterized LOC106397609	12.757	2.78517e-09
LOC106351431	uncharacterized LOC106351431	-1.04551	2.79019e-09
LOC106453067	uncharacterized LOC106453067	1.2044	2.81926e-09
LOC106418590	kunitz-type serine protease inhibitor DrTI-like	1.96903	2.9772e-09
LOC106445300	disease resistance protein TAO1-like	-10.9387	3.10213e-09
LOC106354395	geranylgeranyl diphosphate reductase	-1.05318	3.1479e-09
LOC106454885	monothiol glutaredoxin-S9-like	-2.34113	3.22867e-09
LOC106376574	basic leucine zipper 1-like	-2.00431	3.27638e-09
LOC106404489	probable calcium-binding protein CML26	1.26067	3.27789e-09
LOC106411623	RNA polymerase sigma factor sigE	-2.61813	3.30008e-09
LOC106385853	uncharacterized LOC106385853	-1.06125	3.39413e-09
LOC106402699	uncharacterized LOC106402699	-1.36234	3.58102e-09
LOC106354422	protein SET DOMAIN GROUP 40-like	1.26445	3.58691e-09
LOC106367221	BAG family molecular chaperone regulator 2-like	1.46111	3.58747e-09
LOC106347735	double-stranded RNA-binding protein 3-like	2.23846	3.6087e-09
LOC106352935	uncharacterized LOC106352935	-13.0239	3.63176e-09
LOC106362020	uncharacterized LOC106362020	-2.40486	3.66595e-09
LOC106431390	uncharacterized LOC106431390	12.7799	3.72921e-09
LOC106385484	protein UPSTREAM OF FLC-like	1.03331	3.76321e-09
LOC106410943	uncharacterized LOC106410943	1.20128	3.78734e-09
LOC106382212	probable protein phosphatase 2C 34	1.78802	3.79235e-09
LOC106439795	chlorophyll a-b binding protein 151	-1.09754	3.87068e-09
LOC106455007	pollen receptor-like kinase 5	11.5777	3.9253e-09
LOC106370630	uncharacterized LOC106370630	1.23647	3.9353e-09
LOC106452239	uncharacterized LOC106452239	1.2335	3.97762e-09
LOC106358280	uncharacterized LOC106358280	13.7394	4.05141e-09
LOC106352358	uncharacterized LOC106352358	-13.3926	4.12595e-09
LOC106408520	glutathione S-transferase T3-like	3.59198	4.25004e-09
LOC106384747	uncharacterized LOC106384747	12.1369	4.38167e-09
LOC106411613	transcription factor PAR2-like	-1.00284	4.43604e-09
LOC106349104	alpha/beta hydrolase domain-containing protein 17B-like	1.33793	4.45226e-09
LOC106386568	disease resistance protein TAO1-like	-11.201	4.46758e-09
LOC106357122	zinc finger protein 6-like	1.69958	4.56238e-09
LOC106392102	uncharacterized LOC106392102	12.1224	4.95723e-09
LOC106371587	cysteine proteinase RD21a-like	1.00803	5.1347e-09
LOC106418710	acid phosphatase 1-like	-1.61802	5.18532e-09
LOC106380749	uncharacterized LOC106380749	1.06808	5.18595e-09
LOC106368390	DNA-3-methyladenine glycosylase 1-like	1.21233	5.31055e-09
LOC106446950	3-hydroxyisobutyryl-CoA hydrolase 1-like	-1.18408	5.38903e-09
LOC106415908	glyoxylate/hydroxypyruvate reductase A HPR2	1.19741	5.39107e-09
LOC106378801	uncharacterized LOC106378801	13.2109	5.40164e-09
LOC106363636	transcription factor MYB24-like	1.77424	5.49423e-09
LOC106446043	uncharacterized LOC106446043	-1.51467	5.60065e-09
LOC106374778	HMG-Y-related protein A-like	1.95373	5.69612e-09
LOC106416720	uncharacterized LOC106416720	-12.4241	5.74307e-09
LOC106366735	uncharacterized LOC106366735	1.06657	5.81778e-09
LOC106445538	ultraviolet-B receptor UVR8-like	-1.30963	5.85095e-09
LOC106359855	uncharacterized LOC106359855	-2.26274	5.97287e-09
LOC106407325	zinc finger BED domain-containing protein DAYSLEEPER-like	-1.3875	6.01972e-09
LOC106397490	uncharacterized LOC106397490	13.7382	6.06767e-09
LOC106365213	uncharacterized LOC106365213	-12.3362	6.23248e-09
LOC106443661	arabinogalactan peptide 21-like	-1.12555	6.50255e-09
LOC106372368	uncharacterized LOC106372368	1.06818	6.72498e-09
LOC106386108	putative pentatricopeptide repeat-containing protein At1g77010	1.5739	6.80357e-09
LOC106382138	oleosin S2-2-like	-12.9565	6.82809e-09
LOC106349636	diphthine--ammonia ligase	1.04745	6.86005e-09
LOC106397488	uncharacterized LOC106397488	3.8136	6.86909e-09
LOC106349631	uncharacterized LOC106349631	1.82391	7.02691e-09
LOC106386265	uncharacterized LOC106386265	8.11926	7.07008e-09
LOC106388214	uncharacterized LOC106388214	1.365	7.4829e-09
LOC106352980	extensin-3-like	1.2533	7.50946e-09
LOC106451784	pentatricopeptide repeat-containing protein At3g23020	1.38175	7.53247e-09
LOC106450725	uncharacterized LOC106450725	1.11195	7.59323e-09
LOC106394831	uncharacterized LOC106394831	14.6686	7.72983e-09
LOC106406196	S-adenosyl-L-methionine-dependent tRNA 4-demethylwyosine synthase	1.39476	8.03211e-09
LOC106410625	pre-mRNA-splicing factor ATP-dependent RNA helicase PRP16-like	1.36833	8.07522e-09
LOC106354660	pyrophosphate-energized membrane proton pump 2	-1.12115	8.11095e-09
LOC106371055	uncharacterized LOC106371055	-12.0397	8.1326e-09
LOC106387300	U-box domain-containing protein 7-like	-2.48683	8.2493e-09
LOC106352539	CBL-interacting serine/threonine-protein kinase 9-like	-1.98607	8.47909e-09
LOC106369008	uncharacterized LOC106369008	1.47941	8.65744e-09
LOC106389578	uncharacterized LOC106389578	-1.31312	8.80778e-09
LOC106453325	uncharacterized LOC106453325	-6.23879	8.93886e-09
LOC106447488	uncharacterized LOC106447488	1.51112	9.3722e-09
LOC106381729	uncharacterized LOC106381729	1.59932	9.4775e-09
LOC106381804	probable xyloglucan endotransglucosylase/hydrolase protein 16	-1.21722	9.48784e-09
LOC106397170	60S ribosomal protein L22-2-like	-1.00461	9.66163e-09
LOC106445126	uncharacterized LOC106445126	-1.68311	9.80848e-09
LOC106371943	peptidyl-tRNA hydrolase 2	4.49083	1.00543e-08
LOC106348744	probable histone-arginine methyltransferase 1.3	1.85982	1.03585e-08
LOC106361377	haloacid dehalogenase-like hydrolase domain-containing protein At4g39970	-1.10794	1.03877e-08
LOC106381285	nuclear transcription factor Y subunit A-3-like	1.17292	1.05546e-08
LOC106443682	psbP domain-containing protein 2	-1.59	1.07933e-08
LOC106360595	GDSL esterase/lipase At5g03610-like	2.24907	1.08846e-08
LOC106371024	uncharacterized LOC106371024	12.7162	1.1308e-08
LOC106435462	uncharacterized LOC106435462	1.06967	1.1353e-08
LOC106352821	linoleate 9S-lipoxygenase 5	1.76901	1.14327e-08
LOC106374761	glycine-rich cell wall structural protein 1.0-like	1.09172	1.1511e-08
LOC106395784	uncharacterized LOC106395784	6.28579	1.16021e-08
LOC106354571	F-box protein At1g78100-like	-8.00138	1.1801e-08
LOC106386583	inositol phosphorylceramide glucuronosyltransferase 1-like	1.46826	1.20786e-08
LOC106441924	uncharacterized LOC106441924	-3.29976	1.24723e-08
LOC106440918	magnesium-chelatase subunit ChlH	-1.04908	1.25483e-08
LOC106357861	probable xyloglucan endotransglucosylase/hydrolase protein 16	-1.4661	1.31059e-08
LOC106390609	protein IQ-DOMAIN 14-like	1.0108	1.31587e-08
LOC106452206	jacalin-related lectin 35	1.26302	1.41374e-08
LOC106376036	heat shock 70 kDa protein 6	-11.949	1.41489e-08
LOC106351773	uncharacterized LOC106351773	-12.1795	1.43774e-08
LOC106386755	probable sulfate transporter 3.5	1.15783	1.4414e-08
LOC106413950	uncharacterized LOC106413950	11.8176	1.55001e-08
LOC106386464	EPIDERMAL PATTERNING FACTOR-like protein 2	2.01226	1.63901e-08
LOC106345432	uncharacterized LOC106345432	5.18044	1.73301e-08
LOC106381864	pentatricopeptide repeat-containing protein At3g14580	1.57124	1.7804e-08
LOC106389070	G-type lectin S-receptor-like serine/threonine-protein kinase CES101	1.64331	1.82126e-08
LOC106435457	uncharacterized LOC106435457	1.1367	1.85034e-08
LOC106388313	uncharacterized LOC106388313	13.3851	1.87488e-08
LOC106380990	uncharacterized LOC106380990	10.9724	1.91114e-08
LOC106380893	putative lipid-transfer protein DIR1	1.03583	2.01083e-08
LOC106451281	cell division cycle 20.2	-7.57498	2.01473e-08
LOC106364679	uncharacterized LOC106364679	1.64606	2.07084e-08
LOC106390593	protein phosphatase 2C 70-like	2.67731	2.10891e-08
LOC106451803	signal recognition particle 19 kDa protein	1.00736	2.15756e-08
LOC106406705	mitochondrial outer membrane import complex protein METAXIN-like	-12.4337	2.24732e-08
LOC106412373	putative pentatricopeptide repeat-containing protein At3g13770	2.56355	2.45555e-08
LOC106451037	glycine-rich RNA-binding protein 2-like	1.92844	2.48928e-08
LOC106447959	acid beta-fructofuranosidase 3	-11.928	2.54556e-08
LOC106364754	putative clathrin assembly protein At1g25240	12.4285	2.54719e-08
LOC106415110	probable alpha	-1.27291	2.57449e-08
LOC106366281	protein DA1-related 3-like	11.6264	2.57742e-08
LOC106383800	uncharacterized LOC106383800	2.34713	2.60528e-08
LOC106454156	death domain-associated protein 6-like	12.4763	2.63695e-08
LOC106383586	glutathione S-transferase T3-like	13.4215	2.66579e-08
LOC106391377	O-acyltransferase WSD1-like	1.06339	2.69471e-08
LOC106416556	probable arabinosyltransferase ARAD1	11.5482	2.70638e-08
LOC106441422	zinc finger BED domain-containing protein RICESLEEPER 2-like	-11.5113	2.70745e-08
LOC106355063	thioredoxin reductase 2-like	-2.2227	2.71463e-08
LOC106391023	uncharacterized LOC106391023	13.088	2.71477e-08
LOC106366820	abscisic acid receptor PYR1-like	-1.11468	2.75748e-08
LOC106410962	glucan endo-1	1.56241	2.86286e-08
LOC106363903	uncharacterized LOC106363903	1.07336	2.88331e-08
LOC106445890	uncharacterized LOC106445890	1.21938	2.88403e-08
LOC106399342	uncharacterized LOC106399342	-13.2612	3.00077e-08
LOC106359968	uncharacterized LOC106359968	-11.985	3.0248e-08
LOC106444436	gibberellin 2-beta-dioxygenase 1-like	-1.57222	3.03064e-08
LOC106379838	LOB domain-containing protein 25-like	1.27624	3.07571e-08
LOC106382622	probable protein phosphatase 2C 71	1.69345	3.26233e-08
LOC106351540	CLAVATA3/ESR (CLE)-related protein 43-like	4.83778	3.51577e-08
LOC106366253	uncharacterized LOC106366253	-1.09861	3.52474e-08
LOC106452580	uncharacterized LOC106452580	1.08058	3.71038e-08
LOC106355213	callose synthase 3-like	1.26747	3.71844e-08
LOC106387423	uncharacterized LOC106387423	-6.09008	3.73773e-08
LOC106363740	uncharacterized LOC106363740	13.4199	3.78409e-08
LOC106348379	uncharacterized LOC106348379	-14.3873	3.86354e-08
LOC106451102	protein CHUP1	11.9478	4.05901e-08
LOC106349685	ubiquitin-like-specific protease 1A	1.06105	4.08355e-08
LOC106365618	uncharacterized LOC106365618	1.24529	4.13638e-08
LOC106381157	probable LRR receptor-like serine/threonine-protein kinase At1g56130	1.21768	4.1403e-08
LOC106376713	uncharacterized LOC106376713	1.37739	4.14984e-08
LOC106452809	hevein-like preproprotein	1.24489	4.22322e-08
LOC106445160	uncharacterized LOC106445160	10.8142	4.25417e-08
LOC106396256	uncharacterized LOC106396256	-1.52964	4.49521e-08
LOC106390602	F-box/LRR-repeat protein At5g02910-like	1.11995	4.54397e-08
LOC106412850	uncharacterized LOC106412850	2.83047	4.61145e-08
LOC106440617	beta-galactosidase 1-like	-1.17958	4.65538e-08
LOC106372481	alpha-hydroxynitrile lyase	1.62199	4.87901e-08
LOC106449114	transcription factor PAR2-like	-1.10366	4.87993e-08
LOC106441288	uncharacterized LOC106441288	12.7082	4.8916e-08
LOC106348257	probable 6-phosphogluconolactonase 3	1.18099	4.91743e-08
LOC106394615	uncharacterized LOC106394615	1.78351	4.95785e-08
LOC106384822	ATPase 2	-1.57157	5.03151e-08
LOC106349108	cytochrome P450 85A2-like	-1.33991	5.05158e-08
LOC106366175	protein ROOT PRIMORDIUM DEFECTIVE 1-like	1.47305	5.09097e-08
LOC106369968	probable disease resistance protein RPP1	-12.0464	5.11367e-08
LOC106358144	aquaporin TIP2-1-like	-1.44661	5.24177e-08
LOC106400055	LOB domain-containing protein 25-like	1.30706	5.28872e-08
LOC106364200	uncharacterized LOC106364200	4.08804	5.3509e-08
LOC106448945	uncharacterized LOC106448945	3.68932	5.48867e-08
LOC106410637	probable acyl-activating enzyme 18	1.13373	5.61322e-08
LOC106351559	uncharacterized LOC106351559	-1.20299	5.61696e-08
LOC106415900	uncharacterized LOC106415900	3.15385	5.6595e-08
LOC106355430	receptor-like serine/threonine-protein kinase NCRK	3.77216	5.6842e-08
LOC106390499	ras-related protein RABF2a	1.10632	5.73306e-08
LOC106452286	arabinogalactan peptide 12	-1.38306	5.94889e-08
LOC106452729	oxysterol-binding protein-related protein 3B-like	1.02783	5.97524e-08
LOC106450747	CSC1-like protein At1g11960	-2.56934	6.32134e-08
LOC106388294	uncharacterized LOC106388294	1.61803	6.44787e-08
LOC106422857	gibberellin 2-beta-dioxygenase 1-like	-1.50273	6.50464e-08
LOC106361082	uncharacterized LOC106361082	1.30596	6.51196e-08
LOC106453012	acyl carrier protein	-9.2263	6.62654e-08
LOC106418491	uncharacterized LOC106418491	-1.74294	6.76184e-08
LOC106448680	protein REVEILLE 4-like	-1.06608	6.77335e-08
LOC106377838	lipoxygenase 2	1.52705	6.86965e-08
LOC106389628	bifunctional 3-dehydroquinate dehydratase/shikimate dehydrogenase	-8.84164	6.94781e-08
LOC106388165	expansin-A8-like	-1.46445	7.41664e-08
LOC106416511	GDP-mannose 4	1.43114	7.44651e-08
LOC106418533	fasciclin-like arabinogalactan protein 13	-1.3873	7.48082e-08
LOC106382414	very-long-chain 3-oxoacyl-CoA reductase-A-like	-2.16005	7.51001e-08
LOC106452564	uncharacterized LOC106452564	2.64251	7.6659e-08
LOC106451547	phosphoinositide phospholipase C 8-like	-2.00198	7.68127e-08
LOC106369684	cysteine proteinase RD21a-like	1.05854	8.07047e-08
LOC106382246	zinc finger protein CONSTANS-LIKE 10-like	1.26429	8.57496e-08
LOC106406736	topless-related protein 2-like	1.13221	8.78007e-08
LOC106381261	uncharacterized LOC106381261	1.14426	9.21406e-08
LOC106369090	protein BRASSINAZOLE-RESISTANT 2-like	-1.25366	9.21421e-08
LOC106345955	disease resistance protein TAO1-like	1.11696	9.23552e-08
LOC106453005	probable protein S-acyltransferase 17	-3.76923	9.26518e-08
LOC106404499	uncharacterized LOC106404499	2.27202	9.35923e-08
LOC106348464	glutamine-dependent NAD(+) synthetase-like	1.03861	9.43645e-08
LOC106352899	galactokinase-like	-5.21032	9.45358e-08
LOC106382686	uncharacterized LOC106382686	1.22693	9.6911e-08
LOC106349122	pentatricopeptide repeat-containing protein At3g29290-like	1.52049	9.80114e-08
LOC106391836	uncharacterized LOC106391836	-1.97912	9.82689e-08
LOC106345965	protein PHR1-LIKE 1-like	1.2049	9.85143e-08
LOC106451287	uncharacterized LOC106451287	-1.38181	9.92989e-08
LOC106409244	uncharacterized LOC106409244	-12.1218	1.01556e-07
LOC106453878	uncharacterized LOC106453878	4.44498	1.03751e-07
LOC106368847	uncharacterized LOC106368847	1.13104	1.05193e-07
LOC106370715	probable protein phosphatase 2C 66	2.1136	1.06595e-07
LOC106407713	inositol oxygenase 4	1.75584	1.08715e-07
LOC106387193	uncharacterized LOC106387193	1.01368	1.09174e-07
LOC106445567	F-box protein PP2-A12	1.42198	1.10311e-07
LOC106443199	uncharacterized LOC106443199	-1.54435	1.13028e-07
LOC106402980	aconitate hydratase 2	-10.3728	1.1349e-07
LOC106369983	uncharacterized LOC106369983	1.58021	1.13837e-07
LOC106353637	methionine adenosyltransferase 2 subunit beta-like	1.14035	1.15243e-07
LOC106396384	succinyl-CoA ligase [ADP-forming] subunit alpha-1	1.01576	1.1611e-07
LOC106454740	transcription repressor OFP6-like	2.09802	1.17409e-07
LOC106439027	probable sucrose-phosphatase 1	-1.68813	1.1785e-07
LOC106364268	ethylene-responsive transcription factor ERF026-like	-2.26138	1.18408e-07
LOC106407604	14-3-3-like protein GF14 lambda	-13.0532	1.20988e-07
LOC106391513	receptor-like protein 12	-1.51695	1.22707e-07
LOC106414140	probable mitochondrial import inner membrane translocase subunit TIM21	3.0558	1.24387e-07
LOC106414756	uncharacterized LOC106414756	1.14711	1.25124e-07
LOC106361642	pentatricopeptide repeat-containing protein At1g32415	1.64069	1.25498e-07
LOC106449420	transcription factor PAR2-like	-1.16626	1.27954e-07
LOC106454812	small ubiquitin-related modifier 5-like	-1.20269	1.29867e-07
LOC106358384	ABC transporter G family member 24-like	-12.5898	1.35256e-07
LOC106377835	lipoxygenase 2	2.40933	1.35535e-07
LOC106365664	tryptophan--tRNA ligase	-1.47788	1.41989e-07
LOC106360694	plasminogen activator inhibitor 1 RNA-binding protein-like	6.05234	1.43e-07
LOC106380423	probable arabinosyltransferase ARAD1	-11.3077	1.43276e-07
LOC106411830	uncharacterized protein At5g06450-like	1.10516	1.44447e-07
LOC106406756	TSK-associating protein 1-like	1.31418	1.49368e-07
LOC106406742	conserved oligomeric Golgi complex subunit 3-like	1.03184	1.49439e-07
LOC106368244	40S ribosomal protein S7-3-like	-5.58224	1.53973e-07
LOC106371973	binding partner of ACD11 1-like	-2.81305	1.55576e-07
LOC106389874	reticuline oxidase-like protein	-2.68048	1.56216e-07
LOC106354403	glutathione S-transferase U10-like	-3.79799	1.5935e-07
LOC106372585	phosphatidylinositol N-acetylglucosaminyltransferase gpi3 subunit-like	-1.25674	1.63128e-07
LOC106453028	phosphoglycerate mutase-like protein AT74	-11.88	1.65421e-07
LOC106435409	uncharacterized LOC106435409	1.08808	1.65787e-07
LOC106440010	probable calcium-binding protein CML41	1.00678	1.66751e-07
LOC106390969	uncharacterized LOC106390969	1.02585	1.72646e-07
LOC106398670	ABC transporter G family member 33-like	-2.89294	1.77234e-07
LOC106454746	uncharacterized LOC106454746	1.04334	1.80273e-07
LOC106377568	dnaJ homolog subfamily B member 8-like	-1.56681	1.86429e-07
LOC106397772	4-coumarate--CoA ligase 4-like	3.11761	1.88277e-07
LOC106358546	ATPase 2	-1.67628	1.93332e-07
LOC106408971	protein ENHANCED DISEASE RESISTANCE 2-like	-1.32224	1.93693e-07
LOC106382572	aquaporin PIP2-1	-1.46845	1.99783e-07
LOC106367499	uncharacterized LOC106367499	1.55669	2.04221e-07
LOC106348419	NEDD8-conjugating enzyme Ubc12-like	-2.75138	2.14695e-07
LOC106451769	proteasome subunit beta type-2-A-like	-8.66493	2.15378e-07
LOC106382402	protein NRT1/ PTR FAMILY 6.3-like	1.17831	2.16014e-07
LOC106374205	uncharacterized LOC106374205	-12.2855	2.16414e-07
LOC106401040	receptor-like protein 12	-1.04851	2.26078e-07
LOC106396880	uncharacterized LOC106396880	-1.52426	2.29082e-07
LOC106408546	probable xyloglucan endotransglucosylase/hydrolase protein 17	-1.08789	2.29113e-07
LOC106400639	receptor-like protein kinase 5	1.34116	2.32637e-07
LOC106347167	zinc finger protein CONSTANS-LIKE 16-like	1.78352	2.333e-07
LOC106372689	uncharacterized LOC106372689	4.00239	2.34444e-07
LOC106402265	short-chain dehydrogenase reductase 2a-like	-1.0574	2.36715e-07
LOC106455068	calmodulin-like protein 11	12.7061	2.39528e-07
LOC106348442	GDSL esterase/lipase At1g54020-like	1.12792	2.45673e-07
LOC106437396	uncharacterized LOC106437396	-2.33723	2.48057e-07
LOC106404619	choline-phosphate cytidylyltransferase 2	2.70556	2.54284e-07
LOC106366318	36.4 kDa proline-rich protein-like	-1.0267	2.54983e-07
LOC106438319	uncharacterized LOC106438319	1.02782	2.61497e-07
LOC106356040	thioredoxin reductase 2-like	-1.90385	2.64821e-07
LOC106349121	probable eukaryotic translation initiation factor 5-2	-2.5241	2.76694e-07
LOC106386248	RING-H2 finger protein ATL14-like	2.37164	2.76726e-07
LOC106400096	probable beta-D-xylosidase 7	1.03403	2.79342e-07
LOC106454643	abscisic acid receptor PYL4-like	3.39504	2.83563e-07
LOC106354829	uncharacterized LOC106354829	-1.75122	2.85081e-07
LOC106372449	protein ASPARTIC PROTEASE IN GUARD CELL 2-like	1.21842	2.86561e-07
LOC106404612	choline-phosphate cytidylyltransferase 2	3.56051	2.86904e-07
LOC106413464	uncharacterized protein At3g60930	10.7486	2.94437e-07
LOC106423067	WRKY transcription factor 44-like	1.91584	2.9453e-07
LOC106408069	ankyrin-1-like	-1.20253	2.97393e-07
LOC106396462	aquaporin PIP2-2-like	-1.77223	3.00134e-07
LOC106359390	polyadenylate-binding protein-interacting protein 8-like	1.38003	3.02121e-07
LOC106401865	putative lysine-specific demethylase JMJD5	2.57207	3.15855e-07
LOC106382503	F-box protein At5g49610-like	1.39515	3.17439e-07
LOC106388887	classical arabinogalactan protein 3-like	2.48759	3.31461e-07
LOC106357376	heme-binding protein 2-like	-2.80809	3.44033e-07
LOC106411608	uncharacterized LOC106411608	12.1069	3.47016e-07
LOC106380048	probable trehalose-phosphate phosphatase H	-1.04282	3.51525e-07
LOC106377163	serine carboxypeptidase-like 49	-1.01008	3.56956e-07
LOC106354532	uncharacterized LOC106354532	-1.03201	3.64625e-07
LOC106406303	ras-related protein RABG3d-like	1.14834	3.65952e-07
LOC106447701	jacalin-related lectin 22-like	1.56291	3.69145e-07
LOC106379341	uncharacterized LOC106379341	1.58439	3.71895e-07
LOC106386267	transmembrane protein 258-like	12.3951	3.83038e-07
LOC106381648	serine/threonine-protein kinase-like protein At1g28390	-1.42836	3.83631e-07
LOC106372476	E3 ubiquitin-protein ligase RING1-like	2.14354	3.91382e-07
LOC106439611	G-type lectin S-receptor-like serine/threonine-protein kinase CES101	1.35614	4.07292e-07
LOC106402700	sister chromatid cohesion 1 protein 2-like	1.30228	4.16296e-07
LOC106446413	uncharacterized LOC106446413	1.441	4.17173e-07
LOC106392232	probable xyloglucan endotransglucosylase/hydrolase protein 18	-3.07657	4.18075e-07
LOC106375133	probable ubiquitin-conjugating enzyme E2 31	-13.332	4.2967e-07
LOC106451758	sm-like protein LSM7	1.13866	4.35653e-07
LOC106345199	ABC transporter A family member 8-like	1.76084	4.37253e-07
LOC106417713	adenylyl-sulfate kinase 3-like	1.45102	4.41337e-07
LOC106366217	uncharacterized LOC106366217	-1.45092	4.473e-07
LOC106389862	uncharacterized LOC106389862	12.8982	4.48796e-07
LOC106385391	uncharacterized LOC106385391	1.54346	4.49022e-07
LOC106448938	aquaporin NIP2-1-like	-13.4196	4.52011e-07
LOC106375335	uncharacterized LOC106375335	-1.99669	4.53212e-07
LOC106390469	uncharacterized LOC106390469	1.0932	4.65039e-07
LOC106406419	calcium-dependent protein kinase 29	-3.58654	4.74486e-07
LOC106390230	probable disease resistance protein RPP1	3.80989	4.85523e-07
LOC106399663	uncharacterized LOC106399663	-1.04895	4.86996e-07
LOC106387117	probable LRR receptor-like serine/threonine-protein kinase At3g47570	4.26183	4.89731e-07
LOC106386247	uncharacterized LOC106386247	-2.25658	5.05078e-07
LOC106350920	pentatricopeptide repeat-containing protein At3g13880-like	2.41702	5.0632e-07
LOC106367297	zinc finger protein CONSTANS-LIKE 15-like	1.29115	5.07597e-07
LOC106349035	uncharacterized LOC106349035	1.436	5.10526e-07
LOC106446860	putative cytochrome P450 71A28	1.74813	5.11665e-07
LOC106387404	nicotinamide/nicotinic acid mononucleotide adenylyltransferase	1.70306	5.13764e-07
LOC106347546	transcription factor LUX-like	1.20402	5.26939e-07
LOC106413128	uncharacterized LOC106413128	1.17032	5.51381e-07
LOC106406122	pentatricopeptide repeat-containing protein At4g14850-like	1.83696	5.65818e-07
LOC106390779	lipoyl synthase	1.06988	5.66934e-07
LOC106379188	uncharacterized LOC106379188	5.80861	5.68767e-07
LOC106387116	probable LRR receptor-like serine/threonine-protein kinase At3g47570	1.73496	5.9971e-07
LOC106405554	ribosome biogenesis protein BRX1-like	1.33441	6.08836e-07
LOC106417112	probable acyl-CoA dehydrogenase IBR3	1.81974	6.13757e-07
LOC106450529	universal stress protein A-like protein	-1.62444	6.15235e-07
LOC106417975	uncharacterized LOC106417975	12.4897	6.27478e-07
LOC106387425	uncharacterized LOC106387425	11.9523	6.39404e-07
LOC106391570	CBL-interacting serine/threonine-protein kinase 16-like	-1.68215	6.45119e-07
LOC106345956	U11/U12 small nuclear ribonucleoprotein 48 kDa protein-like	1.11975	6.47091e-07
LOC106357274	uncharacterized LOC106357274	-1.75996	6.49818e-07
LOC106345263	peroxidase 49	12.3382	6.55421e-07
LOC106387296	mitochondrial inner membrane protease ATP23-like	-1.26859	6.55958e-07
LOC106445295	disease resistance protein TAO1-like	-10.5624	6.60659e-07
LOC106359562	auxin-responsive protein IAA14-like	-1.15807	6.72769e-07
LOC106393475	floral homeotic protein APETALA 1 A-like	1.1179	6.73075e-07
LOC106377013	sugar transporter ERD6	-1.02484	6.7635e-07
LOC106352673	pentatricopeptide repeat-containing protein At5g39680	1.84099	6.83118e-07
LOC106416098	EPIDERMAL PATTERNING FACTOR-like protein 1	1.06764	6.88167e-07
LOC106443342	probable 18S rRNA (guanine-N(7))-methyltransferase	-13.1468	6.91097e-07
LOC106452369	pentatricopeptide repeat-containing protein At3g12770-like	1.90498	6.94765e-07
LOC106368832	uncharacterized LOC106368832	1.25082	7.13793e-07
LOC106410270	60S ribosomal protein L18a-like protein	-1.88569	7.16428e-07
LOC106417796	transcription factor bHLH96-like	1.49392	7.26878e-07
LOC106377732	uncharacterized LOC106377732	13.4159	7.29259e-07
LOC106410101	uncharacterized LOC106410101	1.79583	7.2962e-07
LOC106354828	WD repeat-containing protein 76-like	-1.53298	7.31375e-07
LOC106438773	lipid transfer protein EARLI 1-like	1.15688	7.35734e-07
LOC106450979	inorganic phosphate transporter 1-4-like	1.36586	7.37786e-07
LOC106443952	uncharacterized LOC106443952	1.08599	7.39569e-07
LOC106398660	EVI5-like protein	1.19569	8.05518e-07
LOC106453774	uncharacterized protein At4g04775-like	13.0836	8.12316e-07
LOC106378881	uncharacterized LOC106378881	-4.37328	8.17221e-07
LOC106369357	ATPase ASNA1 homolog	1.96493	8.19978e-07
LOC106402999	uncharacterized LOC106402999	1.05783	8.23887e-07
LOC106420862	uncharacterized LOC106420862	-6.35099	8.34925e-07
LOC106447907	short-chain type dehydrogenase/reductase-like	-11.8335	8.40107e-07
LOC106390921	elongation factor Tu	-1.16934	8.41215e-07
LOC106381995	uncharacterized LOC106381995	-4.74269	8.49288e-07
LOC106445310	uncharacterized LOC106445310	-11.1687	9.05201e-07
LOC106452810	hevein-like preproprotein	1.24981	9.12896e-07
LOC106409110	uncharacterized RNA-binding protein C17H9.04c-like	-1.58025	9.37747e-07
LOC106387429	probable WRKY transcription factor 2	1.34414	9.50304e-07
LOC106454680	probable membrane-associated kinase regulator 3	1.69868	9.53047e-07
LOC106381795	probable LRR receptor-like serine/threonine-protein kinase At5g45840	-1.35389	9.72333e-07
LOC106346111	uncharacterized LOC106346111	-12.2623	9.92571e-07
LOC106441062	peroxidase 21	1.49627	9.97394e-07
LOC106363189	uncharacterized LOC106363189	11.8333	1.05723e-06
LOC106402957	E3 ubiquitin-protein ligase CHFR-like	-11.3615	1.0633e-06
LOC106374735	transcription factor MYB1R1-like	1.57991	1.09266e-06
LOC106387141	uncharacterized LOC106387141	1.48109	1.09786e-06
LOC106393412	oligopeptide transporter 7-like	1.45904	1.11753e-06
LOC106352206	uncharacterized LOC106352206	2.71112	1.14155e-06
LOC106403813	uncharacterized LOC106403813	2.69355	1.14682e-06
LOC106347892	15.4 kDa class V heat shock protein-like	-1.41921	1.16034e-06
LOC106347330	uncharacterized LOC106347330	-3.39289	1.16103e-06
LOC106364946	uncharacterized LOC106364946	-2.02875	1.16603e-06
LOC106411206	uncharacterized LOC106411206	-12.2993	1.1687e-06
LOC106386105	salicylate carboxymethyltransferase-like	11.5043	1.18917e-06
LOC106377554	beta-galactosidase 4-like	10.3345	1.23003e-06
LOC106394610	uncharacterized LOC106394610	-2.00966	1.24789e-06
LOC106362927	uncharacterized LOC106362927	1.97808	1.26743e-06
LOC106363338	3-oxoacyl-[acyl-carrier-protein] reductase FabG-like	-1.94211	1.27164e-06
LOC106381135	sufE-like protein 2	1.0038	1.27164e-06
LOC106357342	60S ribosomal protein L30-2	-3.51416	1.31959e-06
LOC106365844	UPF0301 protein Plut_0637-like	-1.48881	1.32507e-06
LOC106362183	protein NRT1/ PTR FAMILY 6.3-like	1.15658	1.33704e-06
LOC106435399	YTH domain-containing family protein 1	2.02071	1.3553e-06
LOC106397638	uncharacterized LOC106397638	11.9005	1.37414e-06
LOC106349237	chlorophyll a-b binding protein 5	-1.03701	1.38364e-06
LOC106374831	acetyl-CoA acetyltransferase	2.17101	1.39028e-06
LOC106439015	TPD1 protein homolog 1	-11.9047	1.40791e-06
LOC106386591	zinc finger CCCH domain-containing protein 58-like	-1.12866	1.46456e-06
LOC106365246	uncharacterized LOC106365246	-1.65833	1.50725e-06
LOC106348498	cryptochrome DASH	-1.25564	1.53467e-06
LOC106431253	putative F-box protein At3g23420	5.29281	1.57512e-06
LOC106377596	uncharacterized LOC106377596	1.00863	1.58151e-06
LOC106404706	uncharacterized LOC106404706	-2.18048	1.58593e-06
LOC106345645	protein RALF-like 22	-1.57504	1.58654e-06
LOC106390658	G-type lectin S-receptor-like serine/threonine-protein kinase At1g61360	1.04885	1.62575e-06
LOC106397114	probable protein phosphatase 2C 68	1.23653	1.63298e-06
LOC106452982	uncharacterized LOC106452982	1.43421	1.6458e-06
LOC106348989	probable D-amino acid oxidase PA4548	1.08019	1.65144e-06
LOC106404391	uncharacterized LOC106404391	1.33286	1.65778e-06
LOC106376653	uncharacterized LOC106376653	1.38922	1.67669e-06
LOC106399222	protein EARLY FLOWERING 4-like	1.39066	1.71767e-06
LOC106361791	uncharacterized LOC106361791	1.04915	1.72033e-06
LOC106358273	glycerophosphodiester phosphodiesterase GDPDL3-like	-11.5593	1.75535e-06
LOC106443622	ribonuclease 1	1.4738	1.75971e-06
LOC106389826	nucleolar protein 58-like	1.64174	1.79665e-06
LOC106383080	uncharacterized LOC106383080	11.4923	1.80933e-06
LOC106409298	pentatricopeptide repeat-containing protein At1g43980	2.16745	1.8215e-06
LOC106357423	deSI-like protein At4g17486	-1.42806	1.82594e-06
LOC106449211	uncharacterized LOC106449211	-12.3172	1.8317e-06
LOC106359792	uncharacterized LOC106359792	-12.0765	1.85186e-06
LOC106417622	methylesterase 17-like	-1.0457	1.86828e-06
LOC106379622	uncharacterized LOC106379622	-11.6428	1.87838e-06
LOC106385436	uncharacterized LOC106385436	-12.182	1.89065e-06
LOC106349502	stem-specific protein TSJT1-like	-1.95987	1.89426e-06
LOC106371823	cycloartenol-C-24-methyltransferase-like	1.43401	1.97866e-06
LOC106450731	uncharacterized LOC106450731	-2.17224	2.00389e-06
LOC106451925	putative pentatricopeptide repeat-containing protein At3g18840	1.19174	2.08284e-06
LOC106372146	myb-related protein Zm38-like	1.29683	2.09765e-06
LOC106450296	peroxidase 25	-11.9908	2.09818e-06
LOC106380477	phosphatidylinositol 4-kinase alpha 1-like	1.13899	2.14246e-06
LOC106395251	uncharacterized LOC106395251	-1.24113	2.14448e-06
LOC106444491	extensin-like	1.45853	2.18341e-06
LOC106360354	pathogen-related protein-like	1.17219	2.19382e-06
LOC106371678	putative protein TPRXL	-1.17309	2.21389e-06
LOC106454059	nitrile-specifier protein 1-like	1.32406	2.24572e-06
LOC106372583	protein TRM32-like	1.7842	2.25155e-06
LOC106362606	putative pectinesterase 10	-1.24594	2.27452e-06
LOC106368844	pentatricopeptide repeat-containing protein At2g20710	1.15431	2.27472e-06
LOC106356928	aldehyde dehydrogenase family 3 member I1	-1.1774	2.28772e-06
LOC106380523	H/ACA ribonucleoprotein complex subunit 2-like protein	1.0901	2.29588e-06
LOC106445298	disease resistance protein TAO1-like	-4.53064	2.31984e-06
LOC106414655	uncharacterized LOC106414655	-12.0648	2.32718e-06
LOC106387293	probable UTP--glucose-1-phosphate uridylyltransferase 2	-5.10532	2.34027e-06
LOC106350298	uncharacterized LOC106350298	-2.84108	2.35359e-06
LOC106407044	expansin-like A1	-1.37444	2.45573e-06
LOC106416410	transcription factor TGA4-like	1.00353	2.45645e-06
LOC106366180	motile sperm domain-containing protein 2-like	1.46543	2.49865e-06
LOC106445128	B3 domain-containing protein REM7-like	-7.24302	2.52271e-06
LOC106389484	rac-like GTP-binding protein ARAC1	-1.43271	2.55421e-06
LOC106388224	autophagy-related protein 8e-like	-1.11964	2.6417e-06
LOC106372156	probable galacturonosyltransferase 14	1.02306	2.74067e-06
LOC106382133	uncharacterized LOC106382133	-7.11298	2.76865e-06
LOC106381564	probable receptor-like protein kinase At1g80640	1.1501	2.82223e-06
LOC106399915	RAN GTPase-activating protein 2	-5.0094	2.83388e-06
LOC106412757	kinesin-like protein NACK2	12.3016	2.83426e-06
LOC106377447	uncharacterized LOC106377447	-1.74534	2.8819e-06
LOC106345195	uncharacterized LOC106345195	12.2273	2.92994e-06
LOC106451493	probable xyloglucan endotransglucosylase/hydrolase protein 32	1.06715	2.94664e-06
LOC106360174	60S ribosomal protein L18-2-like	-3.61636	2.97855e-06
LOC106352869	beta-glucosidase-like SFR2	-10.7811	3.10709e-06
LOC106386711	SPX domain-containing protein 1-like	1.94102	3.18063e-06
LOC106356060	uncharacterized LOC106356060	-2.16525	3.20693e-06
LOC106404680	pentatricopeptide repeat-containing protein At1g52640	1.66134	3.22347e-06
LOC106356969	uncharacterized LOC106356969	-5.48734	3.26313e-06
LOC106401239	probable mediator of RNA polymerase II transcription subunit 37c	-1.28529	3.28774e-06
LOC106382113	cytochrome P450 71B34-like	1.17891	3.30225e-06
LOC106351007	uncharacterized LOC106351007	1.16158	3.33822e-06
LOC106368010	uncharacterized LOC106368010	11.9857	3.34183e-06
LOC106370746	uncharacterized LOC106370746	-2.48011	3.41318e-06
LOC106409301	microtubule-binding protein TANGLED-like	1.02176	3.50783e-06
LOC106348915	peptidyl-prolyl cis-trans isomerase FKBP65-like	1.69885	3.56447e-06
LOC106350959	uncharacterized LOC106350959	-6.37222	3.62226e-06
LOC106389887	reticuline oxidase-like protein	-2.47661	3.70289e-06
LOC106451474	ubiquitin domain-containing protein 1-like	1.16066	3.70747e-06
LOC106356007	DNA polymerase delta subunit 3-like	1.06948	3.75848e-06
LOC106450666	uncharacterized LOC106450666	-12.0859	3.77562e-06
LOC106441776	pentatricopeptide repeat-containing protein At2g18520	1.05489	3.79331e-06
LOC106394717	uncharacterized LOC106394717	-1.65737	3.83465e-06
LOC106445471	uncharacterized LOC106445471	1.44462	3.83498e-06
LOC106347435	uncharacterized LOC106347435	-7.42411	3.87909e-06
LOC106409394	uncharacterized LOC106409394	1.71134	3.88932e-06
LOC106452328	high mobility group B protein 10-like	-2.18403	3.94566e-06
LOC106354655	NADH dehydrogenase [ubiquinone] iron-sulfur protein 8-A	-8.32096	4.08258e-06
LOC106386192	dehydrodolichyl diphosphate synthase 5-like	11.6726	4.10771e-06
LOC106392347	uncharacterized LOC106392347	1.56779	4.13607e-06
LOC106405230	uncharacterized LOC106405230	-13.287	4.1538e-06
LOC106394102	cytochrome P450 81F1-like	2.59307	4.17533e-06
LOC106356713	uncharacterized LOC106356713	13.0857	4.18836e-06
LOC106366308	microtubule-associated protein RP/EB family member 1C-like	1.02064	4.27129e-06
LOC106452021	uncharacterized LOC106452021	-1.00373	4.28096e-06
LOC106379209	uncharacterized LOC106379209	-5.78606	4.4011e-06
LOC106359276	uncharacterized protein At3g60930	10.0601	4.49979e-06
LOC106383903	IRK-interacting protein-like	1.658	4.55615e-06
LOC106423856	trehalose-phosphate phosphatase B-like	-3.61714	4.59915e-06
LOC106382148	WAT1-related protein At3g28100-like	1.08227	4.60251e-06
LOC106367530	myb-like protein V	-1.29364	4.6233e-06
LOC106445601	protein NRT1/ PTR FAMILY 7.3	-1.5604	4.82319e-06
LOC106351825	ethylene-responsive transcription factor ERF025-like	-2.06528	4.84901e-06
LOC106386066	uncharacterized LOC106386066	1.66322	4.85487e-06
LOC106451022	dehydration-responsive element-binding protein 1E	-5.27258	4.88181e-06
LOC106358423	uncharacterized LOC106358423	-5.64542	4.9595e-06
LOC106382490	protein ECERIFERUM 26-like	1.57447	5.00883e-06
LOC106366423	transmembrane and coiled-coil domain-containing protein 4	1.38701	5.0519e-06
LOC106359269	uncharacterized LOC106359269	10.4677	5.0552e-06
LOC106361460	uncharacterized LOC106361460	-11.296	5.07805e-06
LOC106375483	uncharacterized LOC106375483	-8.57284	5.15818e-06
LOC106359549	uncharacterized LOC106359549	-1.78747	5.20571e-06
LOC106385534	UDP-galactose/UDP-glucose transporter 5B	1.70807	5.28872e-06
LOC106354807	lysophospholipid acyltransferase LPEAT1-like	-1.07335	5.32982e-06
LOC106396259	expansin-A8-like	-1.36097	5.3492e-06
LOC106401984	glutathione S-transferase F3-like	1.2487	5.36696e-06
LOC106390425	protein SCO1 homolog 2	1.19028	5.38445e-06
LOC106404874	acyl-protein thioesterase 1-like	-1.22403	5.43935e-06
LOC106389633	snRNA-activating protein complex subunit-like	-1.10192	5.48933e-06
LOC106451050	protein CER1-like 2	1.42146	5.50445e-06
LOC106414858	uncharacterized LOC106414858	1.00571	5.51228e-06
LOC106415499	translation initiation factor IF-2-like	5.79623	5.56453e-06
LOC106346692	uncharacterized LOC106346692	1.58111	5.59371e-06
LOC106362876	uncharacterized LOC106362876	11.6628	5.74288e-06
LOC106354416	ADP	1.20002	5.74739e-06
LOC106379852	uncharacterized protein At5g39570-like	1.2349	5.79396e-06
LOC106388331	uncharacterized LOC106388331	-13.6205	5.8041e-06
LOC106446429	uncharacterized LOC106446429	1.03413	5.81532e-06
LOC106345834	glycine-rich protein 3-like	1.03473	5.84157e-06
LOC106392162	uncharacterized LOC106392162	-11.4975	5.92374e-06
LOC106353191	MATH domain and coiled-coil domain-containing protein At3g58270-like	10.9051	6.02376e-06
LOC106403329	uncharacterized LOC106403329	1.24181	6.07693e-06
LOC106389295	cytochrome P450 705A5-like	-1.43163	6.21728e-06
LOC106385731	telomere repeat-binding factor 1-like	1.07977	6.24819e-06
LOC106400483	uncharacterized LOC106400483	2.47479	6.30972e-06
LOC106391602	probable WRKY transcription factor 27	1.16145	6.37178e-06
LOC106345884	non-specific lipid-transfer protein 3-like	1.83237	6.41682e-06
LOC106450724	universal stress protein A-like protein	-1.69598	6.43041e-06
LOC106351214	desiccation-related protein PCC13-62	11.4481	6.44351e-06
LOC106452032	fe(2+) transport protein 3	-1.2392	6.51888e-06
LOC106439217	pentatricopeptide repeat-containing protein At3g09040	2.16226	6.6481e-06
LOC106399476	B-box zinc finger protein 32-like	-1.79051	6.70363e-06
LOC106402954	pentatricopeptide repeat-containing protein At4g14850-like	1.89399	6.71039e-06
LOC106442228	uncharacterized LOC106442228	2.32006	6.84278e-06
LOC106361389	NAD(P)H-quinone oxidoreductase subunit M	-1.14528	7.09582e-06
LOC106374981	uncharacterized LOC106374981	-1.25059	7.14858e-06
LOC106385189	probable phytol kinase 2	-2.43585	7.20789e-06
LOC106359860	MLP-like protein 328	-5.56354	7.27531e-06
LOC106381801	receptor-like kinase TMK4	-1.07147	7.27796e-06
LOC106371537	uncharacterized LOC106371537	2.08332	7.32754e-06
LOC106438893	oleosin S1-2-like	2.74799	7.39495e-06
LOC106404926	uncharacterized LOC106404926	1.36922	7.42698e-06
LOC106357141	protein terminal ear1	2.46015	7.4387e-06
LOC106394924	uncharacterized LOC106394924	-1.82565	7.44376e-06
LOC106400077	F-box protein At1g61340-like	-1.81831	7.53618e-06
LOC106347521	signal recognition particle receptor subunit beta-like	12.6564	7.70712e-06
LOC106351151	pentatricopeptide repeat-containing protein At3g13880-like	1.45368	7.77092e-06
LOC106407428	uncharacterized LOC106407428	1.02147	7.8359e-06
LOC106392411	pentatricopeptide repeat-containing protein At3g21470-like	1.91122	7.84499e-06
LOC106451105	homeobox-leucine zipper protein ATHB-22	2.15412	7.88242e-06
LOC106389764	homeobox-leucine zipper protein HAT22-like	1.85693	8.02507e-06
LOC106438091	jacalin-related lectin 22-like	1.2385	8.0333e-06
LOC106451101	aspartic proteinase-like protein 2	1.02497	8.0533e-06
LOC106453083	serine/threonine-protein kinase Nek2-like	1.19558	8.09146e-06
LOC106371173	uncharacterized LOC106371173	-2.56188	8.09262e-06
LOC106360437	uncharacterized LOC106360437	-5.9282	8.1534e-06
LOC106354682	N-acylphosphatidylethanolamine synthase	-1.48945	8.28603e-06
LOC106399599	probable methyltransferase PMT23	1.41467	8.31936e-06
LOC106370223	uncharacterized LOC106370223	3.04305	8.37531e-06
LOC106385605	NAC domain-containing protein 8-like	-1.44039	8.53786e-06
LOC106412845	uncharacterized LOC106412845	5.00688	8.65135e-06
LOC106405659	3-oxoacyl-[acyl-carrier-protein] reductase FabG-like	-1.75657	8.6575e-06
LOC106360438	uncharacterized LOC106360438	-3.73796	8.65908e-06
LOC106446253	pentatricopeptide repeat-containing protein At3g49710	1.32806	8.66539e-06
LOC106376358	uncharacterized LOC106376358	3.27833	8.76261e-06
LOC106454642	uncharacterized protein At5g01610-like	1.28934	8.85031e-06
LOC106347839	calmodulin-binding protein 60 A-like	-1.43014	8.88298e-06
LOC106385462	copper transporter 4-like	-1.46591	8.90337e-06
LOC106389831	uncharacterized LOC106389831	11.4472	8.96718e-06
LOC106381190	PRA1 family protein F3-like	1.58533	9.04613e-06
LOC106452674	ATPase ASNA1 homolog 2-like	-1.28324	9.19621e-06
LOC106368711	pentatricopeptide repeat-containing protein At2g22070	1.33603	9.29199e-06
LOC106352279	uncharacterized LOC106352279	11.4266	9.32301e-06
LOC106445293	NAC domain-containing protein 67-like	-1.40923	9.44122e-06
LOC106405947	putative pentatricopeptide repeat-containing protein At3g15200	2.12044	9.90484e-06
LOC106439992	telomere repeat-binding factor 3-like	11.8472	9.91766e-06
LOC106400043	putative pentatricopeptide repeat-containing protein At1g12700	1.52864	9.96061e-06
LOC106453044	pentatricopeptide repeat-containing protein At3g05340	-1.64633	9.96769e-06
LOC106454098	uncharacterized WD repeat-containing protein C2A9.03-like	-1.45664	1.0007e-05
LOC106385997	pentatricopeptide repeat-containing protein At1g77360	1.25557	1.01339e-05
LOC106400689	protein ROOT PRIMORDIUM DEFECTIVE 1-like	1.24318	1.0181e-05
LOC106390423	alanine--glyoxylate aminotransferase 2 homolog 1	-1.72992	1.01903e-05
LOC106366602	uncharacterized LOC106366602	1.10075	1.03613e-05
LOC106379293	uncharacterized LOC106379293	-13.4071	1.03932e-05
LOC106381762	3-oxoacyl-[acyl-carrier-protein] synthase I	-5.92243	1.0424e-05
LOC106375858	uncharacterized LOC106375858	1.11303	1.04652e-05
LOC106368077	F-box protein At3g56470-like	2.04619	1.06311e-05
LOC106396981	uncharacterized LOC106396981	-2.10352	1.06566e-05
LOC106395166	uncharacterized LOC106395166	-1.02622	1.06773e-05
LOC106394508	ARGOS-like protein	-1.22428	1.07121e-05
LOC106378875	uncharacterized LOC106378875	1.05625	1.07338e-05
LOC106377550	zinc finger CCCH domain-containing protein 65-like	1.11576	1.07366e-05
LOC106410236	cadmium/zinc-transporting ATPase HMA2-like	-1.19784	1.0795e-05
LOC106374540	MLP-like protein 328	1.53014	1.1097e-05
LOC106382754	uncharacterized LOC106382754	2.00694	1.12943e-05
LOC106389833	eukaryotic initiation factor 4A-I-like	1.20797	1.13388e-05
LOC106375909	probable alpha	-1.16656	1.16468e-05
LOC106416908	IAA-alanine resistance protein 1-like	1.11717	1.21063e-05
LOC106394738	probable alpha	-1.32587	1.21562e-05
LOC106390810	uncharacterized LOC106390810	-1.66834	1.23983e-05
LOC106381792	uncharacterized LOC106381792	1.44145	1.24429e-05
LOC106383585	uncharacterized LOC106383585	12.2396	1.24778e-05
LOC106395330	transcriptional regulator STERILE APETALA-like	1.40965	1.25909e-05
LOC106371367	E3 ubiquitin-protein ligase At4g11680-like	-1.08556	1.26088e-05
LOC106394469	probable xyloglucan endotransglucosylase/hydrolase protein 18	-1.8096	1.28588e-05
LOC106452236	probable sulfate transporter 3.4	3.1975	1.29065e-05
LOC106371940	pentatricopeptide repeat-containing protein At5g16860-like	2.21436	1.30643e-05
LOC106399127	uncharacterized LOC106399127	12.8486	1.31494e-05
LOC106372486	sulfate transporter 2.1-like	1.1612	1.32109e-05
LOC106361301	uncharacterized LOC106361301	-11.6125	1.34015e-05
LOC106388183	protein LURP-one-related 5	1.11485	1.35268e-05
LOC106380602	ultraviolet-B receptor UVR8-like	-1.62556	1.36479e-05
LOC106398725	probable beta-1	1.49744	1.36518e-05
LOC106381928	uncharacterized LOC106381928	-11.667	1.38506e-05
LOC106416914	pentatricopeptide repeat-containing protein At3g03580-like	2.55386	1.38825e-05
LOC106406191	probable inactive serine/threonine-protein kinase fnkC	1.02425	1.39434e-05
LOC106380437	uncharacterized LOC106380437	10.1725	1.41717e-05
LOC106345651	uncharacterized LOC106345651	2.42381	1.41759e-05
LOC106347322	uncharacterized LOC106347322	4.54683	1.4182e-05
LOC106401638	WAT1-related protein At3g28100	1.0074	1.42182e-05
LOC106438208	ARGOS-like protein	-1.13796	1.42756e-05
LOC106449197	LOB domain-containing protein 20-like	-11.7674	1.43296e-05
LOC106361080	uncharacterized LOC106361080	-1.032	1.45611e-05
LOC106451638	FBD-associated F-box protein At5g38590-like	-1.06161	1.46588e-05
LOC106354413	heavy metal-associated isoprenylated plant protein 26-like	-1.23599	1.47506e-05
LOC106390211	pentatricopeptide repeat-containing protein At2g17525	1.64375	1.494e-05
LOC106411738	uncharacterized LOC106411738	-11.1218	1.50572e-05
LOC106395411	homocysteine S-methyltransferase 3-like	3.89494	1.52466e-05
LOC106390430	uncharacterized LOC106390430	3.4822	1.53587e-05
LOC106345846	uncharacterized LOC106345846	1.02192	1.561e-05
LOC106380232	peroxidase 70-like	-11.369	1.56968e-05
LOC106389761	protein RMD5 homolog A-like	1.02423	1.58726e-05
LOC106376333	uncharacterized LOC106376333	6.1091	1.59747e-05
LOC106366770	homeobox protein knotted-1-like 4	1.1679	1.59865e-05
LOC106409056	wound-induced basic protein-like	-1.12469	1.63379e-05
LOC106406366	uncharacterized LOC106406366	-1.08502	1.65865e-05
LOC106379717	NADPH--cytochrome P450 reductase 2-like	-6.53455	1.67768e-05
LOC106368558	pentatricopeptide repeat-containing protein At1g11290	1.04186	1.68495e-05
LOC106380526	porphobilinogen deaminase	-1.18205	1.68859e-05
LOC106351141	uncharacterized LOC106351141	-1.46559	1.70032e-05
LOC106374043	uncharacterized LOC106374043	1.04015	1.74373e-05
LOC106358275	uncharacterized LOC106358275	1.06756	1.75176e-05
LOC106378029	uncharacterized LOC106378029	2.5118	1.76012e-05
LOC106392077	uncharacterized LOC106392077	1.65167	1.76879e-05
LOC106381699	LRR receptor-like serine/threonine-protein kinase EFR	4.42931	1.76914e-05
LOC106454015	probable disease resistance protein RPP1	1.14281	1.80646e-05
LOC106399181	pentatricopeptide repeat-containing protein At5g46460	1.73506	1.81395e-05
LOC106348445	epithiospecifier protein-like	1.74127	1.8145e-05
LOC106346270	tetraketide alpha-pyrone reductase 1-like	-1.05007	1.83281e-05
LOC106427278	short-chain dehydrogenase TIC 32	1.90623	1.87379e-05
LOC106348481	1-aminocyclopropane-1-carboxylate oxidase 5-like	1.42242	1.8749e-05
LOC106379578	uncharacterized LOC106379578	-11.6488	1.89021e-05
LOC106455021	uncharacterized LOC106455021	-7.20368	1.90851e-05
LOC106450695	expansin-A8	-1.24618	1.94031e-05
LOC106380531	E2F-associated phosphoprotein-like	11.4241	1.96086e-05
LOC106402615	uncharacterized LOC106402615	1.06479	1.96747e-05
LOC106378683	uncharacterized LOC106378683	3.09379	1.9908e-05
LOC106366040	WD repeat-containing protein RUP2	-1.68303	1.9949e-05
LOC106410653	lipoxygenase 2	2.09417	2.03544e-05
LOC106450539	DELLA protein RGL2	1.0902	2.04267e-05
LOC106437235	receptor-like protein kinase THESEUS 1	-1.40989	2.06246e-05
LOC106455059	uncharacterized LOC106455059	1.74974	2.08784e-05
LOC106357209	heavy metal-associated isoprenylated plant protein 26-like	2.60834	2.09327e-05
LOC106377082	pectin acetylesterase 8	-1.12635	2.09381e-05
LOC106354586	transcription factor TGA7-like	-10.5501	2.10227e-05
LOC106401536	uncharacterized LOC106401536	-12.112	2.10272e-05
LOC106392564	uncharacterized LOC106392564	-1.2784	2.11836e-05
LOC106452047	uncharacterized LOC106452047	-1.44979	2.23676e-05
LOC106438243	autophagy-related protein 8e	-1.17956	2.25401e-05
LOC106359535	uncharacterized LOC106359535	-1.89104	2.30381e-05
LOC106401200	chlorophyll a-b binding protein 5	-1.1445	2.32165e-05
LOC106350284	polygalacturonase At1g48100-like	1.46943	2.39086e-05
LOC106416234	dehydrin Rab18-like	1.42709	2.44587e-05
LOC106364269	ethylene-responsive transcription factor ERF026-like	-1.85269	2.45146e-05
LOC106347962	peroxidase 71-like	1.42492	2.47956e-05
LOC106389519	filament-like plant protein 1	-10.014	2.49903e-05
LOC106405993	tyrosine-sulfated glycopeptide receptor 1-like	1.08813	2.51442e-05
LOC106417365	non-specific lipid-transfer protein 4-like	1.44174	2.53142e-05
LOC106391520	protein IQ-DOMAIN 1-like	-1.02708	2.55512e-05
LOC106452790	pentatricopeptide repeat-containing protein At4g31070	1.79281	2.56232e-05
LOC106444778	uncharacterized LOC106444778	1.6281	2.58144e-05
LOC106435549	DNA-directed RNA polymerase subunit 5-like protein 1	11.7357	2.60014e-05
LOC106454684	origin of replication complex subunit 2	1.0864	2.69219e-05
LOC106386118	uncharacterized LOC106386118	-1.24748	2.70995e-05
LOC106368218	UDP-glucose 6-dehydrogenase 3-like	2.18713	2.72715e-05
LOC106395025	methylsterol monooxygenase 1-1	6.04787	2.7452e-05
LOC106381857	serine/threonine-protein kinase 25-like	-1.59433	2.7531e-05
LOC106361163	U-box domain-containing protein 56-like	1.89763	2.78271e-05
LOC106444108	early nodulin-like protein 1	12.2551	2.78368e-05
LOC106382071	probable inactive purple acid phosphatase 9	1.29959	2.85532e-05
LOC106450609	agamous-like MADS-box protein AGL5	2.32049	2.85735e-05
LOC106449752	uncharacterized LOC106449752	1.96215	2.9234e-05
LOC106372170	protein SPIRAL1-like 4	-3.84001	2.95828e-05
LOC106345652	uncharacterized LOC106345652	1.52384	2.97229e-05
LOC106393971	glutamate receptor 2.8-like	-1.57542	2.97537e-05
LOC106371970	pentatricopeptide repeat-containing protein At5g16860-like	1.83848	3.03311e-05
LOC106440920	polyamine oxidase 1-like	-2.23674	3.03983e-05
LOC106351544	probable mediator of RNA polymerase II transcription subunit 37c	-1.48209	3.0399e-05
LOC106411521	potassium channel GORK-like	1.18881	3.13801e-05
LOC106364263	uncharacterized LOC106364263	-3.83702	3.14065e-05
LOC106390083	probable acyl-[acyl-carrier-protein]--UDP-N-acetylglucosamine O-acyltransferase	1.35166	3.17145e-05
LOC106372451	protein ASPARTIC PROTEASE IN GUARD CELL 2-like	-1.31391	3.18005e-05
LOC106440963	early nodulin-like protein 2	-1.35706	3.18745e-05
LOC106444189	probable leucine-rich repeat receptor-like protein kinase At5g49770	-1.43422	3.23596e-05
LOC106397540	pyruvate dehydrogenase (acetyl-transferring) kinase	-3.2847	3.24658e-05
LOC106404650	uncharacterized LOC106404650	2.28475	3.29696e-05
LOC106361931	uncharacterized LOC106361931	-2.56221	3.2979e-05
LOC106406713	uncharacterized LOC106406713	2.50546	3.35209e-05
LOC106368228	UDP-arabinopyranose mutase 2	1.12208	3.36448e-05
LOC106414173	putative serine/threonine-protein kinase	-10.8332	3.3735e-05
LOC106346749	uncharacterized LOC106346749	-1.12725	3.4428e-05
LOC106391141	NADPH--cytochrome P450 reductase 2-like	-1.07487	3.44454e-05
LOC106368866	pentatricopeptide repeat-containing protein At2g17210-like	1.28392	3.44945e-05
LOC106356121	transcription factor TCP12-like	3.43459	3.51082e-05
LOC106395546	probable N-acetyltransferase HLS1-like	-1.4266	3.54046e-05
LOC106441538	kinesin-like protein KIN12A	3.96666	3.55341e-05
LOC106442630	ACT domain-containing protein ACR7-like	-1.09857	3.63313e-05
LOC106390154	basic endochitinase CHB4-like	2.13537	3.66225e-05
LOC106449180	mediator-associated protein 1-like	1.50654	3.78587e-05
LOC106445976	uncharacterized LOC106445976	-5.04904	3.80414e-05
LOC106389446	uncharacterized LOC106389446	-1.06106	3.82717e-05
LOC106389402	pentatricopeptide repeat-containing protein At2g13600-like	1.11561	3.86918e-05
LOC106454592	protein EARLY FLOWERING 4	1.41177	3.88624e-05
LOC106407250	protein PHLOEM PROTEIN 2-LIKE A10-like	-1.25243	3.93656e-05
LOC106441559	putative F-box protein At1g46984	-11.1251	3.93807e-05
LOC106450012	salicylic acid-binding protein 2-like	-1.33294	3.94304e-05
LOC106375894	pentatricopeptide repeat-containing protein At4g16835	1.3151	3.94748e-05
LOC106396305	uncharacterized LOC106396305	-1.20915	3.95976e-05
LOC106353948	uncharacterized LOC106353948	-1.03543	3.96157e-05
LOC106354671	uncharacterized LOC106354671	-10.8805	3.98189e-05
LOC106431049	polyamine oxidase 1	-1.97831	3.98368e-05
LOC106416658	fe(2+) transport protein 3	-1.3832	4.0732e-05
LOC106415017	acid beta-fructofuranosidase 4	-1.02573	4.10118e-05
LOC106388436	uncharacterized LOC106388436	1.84337	4.13237e-05
LOC106384098	4-substituted benzoates-glutamate ligase GH3.12-like	10.5458	4.15281e-05
LOC106372459	cytochrome P450 81D1-like	1.07674	4.23879e-05
LOC106387584	pentatricopeptide repeat-containing protein At3g24000	1.31658	4.23886e-05
LOC106365245	tyrosine decarboxylase 1-like	3.32048	4.26321e-05
LOC106414640	subtilisin-like protease SBT1.6	1.79476	4.34817e-05
LOC106364922	uncharacterized LOC106364922	-1.57624	4.39346e-05
LOC106374328	uncharacterized LOC106374328	1.96185	4.41561e-05
LOC106379059	probable WRKY transcription factor 51	-3.34179	4.46944e-05
LOC106348424	uncharacterized LOC106348424	-11.4684	4.53274e-05
LOC106390181	xyloglucan endotransglucosylase/hydrolase protein 24	-1.42508	4.5374e-05
LOC106353200	myosin-16-like	1.53187	4.53981e-05
LOC106370149	transcription factor PRE5-like	-1.34378	4.54591e-05
LOC106354820	uncharacterized LOC106354820	-11.6937	4.5558e-05
LOC106386782	basic 7S globulin 2-like	1.19561	4.56154e-05
LOC106402886	pentatricopeptide repeat-containing protein At1g52620-like	1.17835	4.77094e-05
LOC106383054	uncharacterized LOC106383054	1.15816	4.77136e-05
LOC106364488	uncharacterized LOC106364488	3.16691	4.78343e-05
LOC106404586	probable ribosome biogenesis protein RLP24	1.16054	4.81496e-05
LOC106454804	uncharacterized LOC106454804	1.64463	4.81636e-05
LOC106370479	uncharacterized LOC106370479	-1.36302	4.81997e-05
LOC106365586	uncharacterized LOC106365586	-1.14705	4.85296e-05
LOC106441506	tryptophan--tRNA ligase	-10.7362	4.85449e-05
LOC106435325	NAC domain-containing protein 18	3.17622	4.91741e-05
LOC106371292	uncharacterized LOC106371292	-1.15578	4.94172e-05
LOC106374319	ubiquitin-conjugating enzyme 15	1.27315	5.00438e-05
LOC106416767	uncharacterized LOC106416767	10.8506	5.00477e-05
LOC106404368	glycine-rich cell wall structural protein-like	1.23834	5.07429e-05
LOC106377541	uncharacterized LOC106377541	1.03012	5.10675e-05
LOC106404001	putative F-box protein At3g17620	8.06377	5.14566e-05
LOC106389830	uncharacterized LOC106389830	11.1565	5.19308e-05
LOC106451419	transcription repressor OFP2	2.23813	5.20232e-05
LOC106449380	myb-related protein Myb4-like	11.6099	5.23275e-05
LOC106380745	auxin-responsive protein IAA19-like	-1.30206	5.24881e-05
LOC106356122	CLAVATA3/ESR (CLE)-related protein 12-like	2.1254	5.31018e-05
LOC106388194	cytochrome P450 89A2-like	-1.01849	5.31437e-05
LOC106450431	uncharacterized LOC106450431	-1.25277	5.3331e-05
LOC106417036	18.1 kDa class I heat shock protein-like	4.51128	5.4055e-05
LOC106445691	probable glutathione peroxidase 2	1.28908	5.57839e-05
LOC106382095	receptor for activated C kinase 1B	1.79947	5.57909e-05
LOC106412321	uncharacterized LOC106412321	2.25535	5.61976e-05
LOC106397308	probable WRKY transcription factor 57	1.46616	5.6364e-05
LOC106444492	14 kDa proline-rich protein DC2.15	1.02285	5.783e-05
LOC106380868	calcineurin B-like protein 2	1.24044	5.80508e-05
LOC106455035	chloride channel protein CLC-e-like	-1.03005	5.88617e-05
LOC106380401	putative lactoylglutathione lyase	1.18351	5.91361e-05
LOC106390484	ABC transporter C family member 3-like	1.94079	5.94719e-05
LOC106348502	chaperone protein dnaJ 11	-1.0716	6.07797e-05
LOC106447644	WAT1-related protein At4g01450-like	1.43461	6.09672e-05
LOC106357734	uncharacterized LOC106357734	6.22934	6.12571e-05
LOC106354642	extensin-3-like	2.74678	6.16717e-05
LOC106407247	protein slowmo homolog	1.45398	6.22775e-05
LOC106354826	uncharacterized LOC106354826	-11.1305	6.25112e-05
LOC106382548	uncharacterized LOC106382548	-3.62681	6.29517e-05
LOC106445280	uncharacterized LOC106445280	6.99425	6.43698e-05
LOC106378578	glutathione S-transferase T3-like	11.5917	6.49036e-05
LOC106391816	polygalacturonase-like	-10.7867	6.49173e-05
LOC106349238	LOB domain-containing protein 25-like	1.61808	6.55306e-05
LOC106365948	amino acid permease 3	-3.13918	6.57506e-05
LOC106356290	uncharacterized LOC106356290	-3.34045	6.60835e-05
LOC106407500	uncharacterized LOC106407500	1.26858	6.66283e-05
LOC106404110	uncharacterized LOC106404110	-1.09456	6.67031e-05
LOC106359732	15.4 kDa class V heat shock protein-like	-1.98757	6.69378e-05
LOC106369853	probable ubiquitin-conjugating enzyme E2 17	-1.69395	6.69569e-05
LOC106357144	putative caffeoyl-CoA O-methyltransferase At1g67980	5.09447	6.75028e-05
LOC106357106	transcription factor MYB24-like	1.82026	6.75882e-05
LOC106433397	uncharacterized LOC106433397	-11.2835	6.78248e-05
LOC106379841	uncharacterized LOC106379841	1.55299	6.83608e-05
LOC106347483	uncharacterized LOC106347483	1.20273	6.87846e-05
LOC106379918	dehydration-responsive element-binding protein 1F-like	-2.91753	6.88248e-05
LOC106371824	uncharacterized LOC106371824	1.24666	6.96386e-05
LOC106398083	uncharacterized LOC106398083	-1.1817	7.01171e-05
LOC106404576	50S ribosomal protein 5	1.27829	7.02491e-05
LOC106441311	uncharacterized LOC106441311	2.86138	7.04544e-05
LOC106451273	uncharacterized LOC106451273	-3.11755	7.07683e-05
LOC106438387	heat stress transcription factor A-2-like	-2.83783	7.1609e-05
LOC106368213	transcription factor MYB34-like	3.08812	7.1615e-05
LOC106353095	probable mediator of RNA polymerase II transcription subunit 37c	-1.31481	7.23987e-05
LOC106406121	pentatricopeptide repeat-containing protein At4g14850-like	1.6166	7.27883e-05
LOC106452309	beta-fructofuranosidase	1.36622	7.31688e-05
LOC106445945	uncharacterized LOC106445945	2.14253	7.43391e-05
LOC106397385	protein PHLOEM PROTEIN 2-LIKE A10-like	-1.25194	7.4922e-05
LOC106380808	uncharacterized LOC106380808	1.74348	7.51412e-05
LOC106377402	agamous-like MADS-box protein AGL5	2.19971	7.51634e-05
LOC106372594	uncharacterized LOC106372594	2.8441	7.51981e-05
LOC106447753	GDT1-like protein 4	11.9849	7.54715e-05
LOC106393232	uncharacterized LOC106393232	5.67325	7.56639e-05
LOC106406716	uncharacterized LOC106406716	2.80607	7.60997e-05
LOC106414967	acid beta-fructofuranosidase 4	-1.05539	7.61303e-05
LOC106379070	aquaporin PIP2-1-like	-2.04674	7.69955e-05
LOC106382264	GTP cyclohydrolase 1-like	2.06218	7.70481e-05
LOC106387213	putative pentatricopeptide repeat-containing protein At1g74400	1.61258	7.70519e-05
LOC106446064	uncharacterized LOC106446064	1.98553	7.73093e-05
LOC106446384	protein NRT1/ PTR FAMILY 7.2-like	-2.31854	7.80065e-05
LOC106423319	uncharacterized LOC106423319	-12.0204	7.89912e-05
LOC106394783	root meristem growth factor 6-like	-1.92801	7.98938e-05
LOC106351770	short-chain dehydrogenase reductase 3a-like	-3.84688	8.04464e-05
LOC106366184	uncharacterized LOC106366184	3.32302	8.07079e-05
LOC106385310	auxin-responsive protein SAUR21-like	-1.627	8.08839e-05
LOC106408885	uncharacterized LOC106408885	-1.14637	8.24906e-05
LOC106361410	cytochrome P450 81F1-like	2.74174	8.26779e-05
LOC106412314	uncharacterized LOC106412314	2.11809	8.26961e-05
LOC106354273	uncharacterized LOC106354273	-1.22796	8.27771e-05
LOC106418480	tetracycline resistance protein	1.12564	8.28296e-05
LOC106414218	uncharacterized LOC106414218	11.4785	8.30629e-05
LOC106347020	uncharacterized LOC106347020	1.33629	8.32346e-05
LOC106385789	uncharacterized LOC106385789	10.8765	8.37289e-05
LOC106398717	aquaporin PIP2-2-like	-1.48067	8.40705e-05
LOC106362134	endonuclease 1-like	-1.1821	8.41918e-05
LOC106351535	probable cysteine proteinase At4g11310	10.6774	8.52064e-05
LOC106372650	putative phytosulfokines 6	1.14654	8.53006e-05
LOC106443498	CASP-like protein 2B1	1.59579	8.58218e-05
LOC106438385	heat stress transcription factor A-2-like	-2.75989	8.59038e-05
LOC106379685	3-isopropylmalate dehydrogenase 3	3.71299	8.60535e-05
LOC106380420	heat stress transcription factor A-1b-like	-10.3333	8.67949e-05
LOC106384784	J domain-containing protein spf31-like	1.06938	8.68898e-05
LOC106449183	uncharacterized LOC106449183	2.56423	8.69451e-05
LOC106438347	tropinone reductase homolog At2g29310	-1.06327	8.78153e-05
LOC106380944	homogentisate 1	1.09577	8.82541e-05
LOC106375867	microtubule-associated protein 70-5-like	6.19729	8.82975e-05
LOC106414377	oleosin S2-2-like	-11.9828	8.84865e-05
LOC106400906	uncharacterized LOC106400906	1.34465	8.85695e-05
LOC106444905	zinc finger BED domain-containing protein RICESLEEPER 2-like	-1.17252	8.8617e-05
LOC106380870	oligopeptide transporter 1	1.11465	9.10978e-05
LOC106402654	tyrosine-sulfated glycopeptide receptor 1-like	1.04927	9.19468e-05
LOC106399495	germin-like protein subfamily 2 member 3	1.38716	9.26452e-05
LOC106403754	pentatricopeptide repeat-containing protein At1g53600	1.19963	9.27072e-05
LOC106393499	putative chromatin-remodeling complex ATPase chain	1.51193	9.30488e-05
LOC106345938	pentatricopeptide repeat-containing protein At1g53600	1.64599	9.32305e-05
LOC106401859	pentatricopeptide repeat-containing protein At1g04840-like	1.42872	9.35395e-05
LOC106409136	uncharacterized LOC106409136	3.157	9.41126e-05
LOC106406682	probable WRKY transcription factor 70	1.20952	9.45925e-05
LOC106425477	uncharacterized LOC106425477	11.3454	9.59916e-05
LOC106390831	DNA-binding protein SMUBP-2-like	-1.04533	9.65585e-05
LOC106389271	uncharacterized LOC106389271	1.49165	9.70005e-05
LOC106391771	probable serine/threonine-protein kinase At1g09600	9.96012	9.73535e-05
LOC106443808	peptide methionine sulfoxide reductase B5-like	1.00196	9.84749e-05
LOC106349445	lectin-like protein LEC	-1.41329	9.91359e-05
LOC106402622	uncharacterized LOC106402622	-1.22627	9.95193e-05
LOC106352698	UPF0392 protein RCOM_0530710-like	1.93618	0.000100768
LOC106447161	DEAD-box ATP-dependent RNA helicase 21-like	10.0697	0.000101144
LOC106382915	amino acid permease 4	1.00074	0.000101225
LOC106410408	pentatricopeptide repeat-containing protein At2g03380	1.54529	0.000101282
LOC106386893	DNA-directed RNA polymerase III subunit RPC10-like	1.67048	0.000102025
LOC106370082	protein NIM1-INTERACTING 1-like	1.763	0.000102533
LOC106401103	serine carboxypeptidase-like 31	-1.32482	0.000102573
LOC106402689	uncharacterized LOC106402689	1.1709	0.000105036
LOC106401766	stem-specific protein TSJT1-like	-1.01199	0.000105282
LOC106405174	uncharacterized LOC106405174	-11.1374	0.000105491
LOC106371174	uncharacterized LOC106371174	-4.45373	0.000107092
LOC106405247	trigger factor-like	12.0705	0.000107109
LOC106391984	protein phosphatase 2C 3-like	1.41577	0.000109375
LOC106381546	amyrin synthase LUP2-like	1.23006	0.000109405
LOC106452881	uncharacterized protein sll1770-like	-1.20068	0.000109868
LOC106438287	uncharacterized LOC106438287	2.39027	0.00011067
LOC106438508	alpha-aminoadipic semialdehyde synthase	1.20977	0.000111396
LOC106414324	uncharacterized LOC106414324	1.17153	0.000111744
LOC106357058	protein MAK16 homolog A-like	1.17819	0.000112802
LOC106455066	uncharacterized LOC106455066	12.5588	0.000114261
LOC106357767	cytosolic sulfotransferase 12	1.4055	0.00011476
LOC106412351	pentatricopeptide repeat-containing protein At3g58590-like	1.16903	0.000115981
LOC106377856	uncharacterized LOC106377856	1.30498	0.000116065
LOC106354686	uncharacterized membrane protein sll0875	-7.31694	0.000116102
LOC106411875	uncharacterized LOC106411875	1.1415	0.000118373
LOC106410794	50S ribosomal protein L7/L12-like	11.8295	0.000118746
LOC106353813	protein CHUP1	1.15642	0.000118816
LOC106352068	probable receptor-like protein kinase At5g56460	1.18487	0.00011963
LOC106345289	transcription factor HY5-like	-1.23207	0.0001203
LOC106382462	uncharacterized LOC106382462	2.10143	0.000120346
LOC106371942	TOM1-like protein 2	1.06594	0.000121877
LOC106380422	binding partner of ACD11 1	-1.37493	0.00012201
LOC106376003	cellulose synthase-like protein G2	-1.55149	0.00012253
LOC106381062	zinc finger BED domain-containing protein RICESLEEPER 2-like	-1.30375	0.000122885
LOC106379189	uncharacterized LOC106379189	10.6495	0.000123845
LOC106392662	peroxidase 21	1.84475	0.000128334
LOC106382029	ubiquinone biosynthesis protein COQ4 homolog	1.13996	0.000129108
LOC106357295	CRIB domain-containing protein RIC4-like	-11.9315	0.000129281
LOC106438048	protein EARLY FLOWERING 4-like	1.07222	0.000129353
LOC106356923	uncharacterized LOC106356923	-1.14457	0.000129965
LOC106449695	uncharacterized LOC106449695	-11.323	0.000130124
LOC106359444	uncharacterized LOC106359444	1.43816	0.000130713
LOC106345769	keratin-associated protein 6-2-like	-1.76737	0.000131579
LOC106404457	uncharacterized LOC106404457	-5.40251	0.000132673
LOC106425499	CDPK-related kinase 5-like	10.8382	0.000134076
LOC106397460	uncharacterized LOC106397460	1.1656	0.000135207
LOC106359652	uncharacterized LOC106359652	10.9411	0.000135239
LOC106404664	uncharacterized LOC106404664	1.21877	0.000135901
LOC106364104	transcription initiation factor IIF subunit alpha-like	4.32859	0.000136672
LOC106401584	uncharacterized LOC106401584	1.0467	0.000136921
LOC106450676	uncharacterized LOC106450676	1.73911	0.000137765
LOC106366920	pentatricopeptide repeat-containing protein At4g04370-like	1.38558	0.000138239
LOC106364501	uncharacterized LOC106364501	-11.4472	0.000138677
LOC106382965	uncharacterized LOC106382965	-1.91711	0.00013949
LOC106354846	glycerol kinase-like	1.72866	0.000139521
LOC106394558	glutathione S-transferase U11-like	11.0914	0.000140699
LOC106444072	uncharacterized LOC106444072	2.18714	0.000142002
LOC106352559	uncharacterized protein At4g22758-like	1.05261	0.000142101
LOC106379508	protein LIGHT-DEPENDENT SHORT HYPOCOTYLS 7	1.02889	0.00014323
LOC106410752	probable protein phosphatase 2C 67	-2.48408	0.000143904
LOC106416764	kunitz-type serine protease inhibitor DrTI-like	1.74933	0.000144843
LOC106406022	glutamate--glyoxylate aminotransferase 2	1.20156	0.00014699
LOC106406722	uncharacterized LOC106406722	1.07691	0.000147419
LOC106402909	UPF0392 protein RCOM_0530710-like	1.60762	0.000148197
LOC106451027	uncharacterized LOC106451027	1.02543	0.000149838
LOC106426385	pentatricopeptide repeat-containing protein At1g66345	1.1407	0.000150418
LOC106412123	probable xyloglucan endotransglucosylase/hydrolase protein 33	-1.89424	0.000150524
LOC106404900	uncharacterized LOC106404900	1.45081	0.00015114
LOC106407079	uncharacterized LOC106407079	1.21785	0.000151317
LOC106368941	uncharacterized LOC106368941	1.22046	0.000152491
LOC106409036	methionine aminotransferase BCAT4-like	2.54513	0.000153599
LOC106454827	calmodulin-binding protein 60 B-like	-1.10574	0.000154789
LOC106356404	uncharacterized LOC106356404	-2.59236	0.000156189
LOC106389698	thiamine-repressible mitochondrial transport protein THI74-like	1.15963	0.000158401
LOC106452443	protein fluG-like	1.89784	0.000159307
LOC106349357	uncharacterized LOC106349357	10.4213	0.000160811
LOC106390145	uncharacterized LOC106390145	10.7708	0.000161447
LOC106368136	deSI-like protein At4g17486	-1.09438	0.00016179
LOC106386021	classical arabinogalactan protein 27-like	-3.68896	0.000161825
LOC106453040	uncharacterized LOC106453040	-4.15408	0.000162064
LOC106385263	uncharacterized LOC106385263	-1.68736	0.000162739
LOC106377545	formin-like protein 3	1.03225	0.000163422
LOC106386572	pentatricopeptide repeat-containing protein At5g18390	1.35657	0.000163471
LOC106360435	uncharacterized LOC106360435	-3.54284	0.000164019
LOC106446544	uncharacterized LOC106446544	-1.60565	0.000164447
LOC106402819	pentatricopeptide repeat-containing protein At5g40410	1.67788	0.000164735
LOC106372168	probable receptor-like protein kinase At5g39030	-1.42919	0.000164878
LOC106414278	DNA polymerase alpha catalytic subunit-like	3.05318	0.000165877
LOC106426619	uncharacterized LOC106426619	1.12281	0.000167544
LOC106387993	UDP-glycosyltransferase 74D1-like	1.62773	0.0001679
LOC106431381	glutaredoxin-C8-like	12.2708	0.000169597
LOC106451307	protein FAR1-RELATED SEQUENCE 2-like	1.19165	0.000169877
LOC106368211	40S ribosomal protein S9-1-like	1.22238	0.000170082
LOC106440329	B-box zinc finger protein 22-like	-1.02181	0.000170095
LOC106362820	uncharacterized LOC106362820	-2.57075	0.00017144
LOC106357667	uncharacterized LOC106357667	-1.47495	0.000172777
LOC106441721	acanthoscurrin-2-like	1.95399	0.000173861
LOC106381596	uncharacterized LOC106381596	11.2839	0.000174272
LOC106412609	ammonium transporter 1 member 1-like	1.38453	0.000175981
LOC106365365	uncharacterized LOC106365365	1.4266	0.000176222
LOC106346484	protein PHYTOCHROME KINASE SUBSTRATE 2-like	-1.22542	0.000178408
LOC106386570	putative U-box domain-containing protein 46	-1.89049	0.00018123
LOC106386111	random slug protein 5-like	1.66681	0.000183084
LOC106376156	putative cell wall protein	1.40136	0.000184033
LOC106391591	xyloglucan endotransglucosylase/hydrolase protein 24-like	-1.19176	0.000184309
LOC106449269	fidgetin-like protein 1	2.14891	0.000188666
LOC106373274	uncharacterized LOC106373274	10.604	0.000190344
LOC106447500	uncharacterized LOC106447500	1.24431	0.000191136
LOC106410155	probable sucrose-phosphate synthase 4	1.34126	0.000191395
LOC106347499	uncharacterized LOC106347499	-1.20759	0.000192117
LOC106356074	uncharacterized LOC106356074	1.4301	0.00019254
LOC106352353	uncharacterized LOC106352353	-1.58165	0.000192945
LOC106447834	uncharacterized LOC106447834	8.71586	0.000193836
LOC106444196	uncharacterized LOC106444196	1.12568	0.000194347
LOC106350277	polygalacturonase At1g48100-like	1.29975	0.000196651
LOC106380156	probable WRKY transcription factor 51	-2.18707	0.000196996
LOC106397071	proton pump-interactor 2-like	-4.96163	0.000197054
LOC106372188	uncharacterized LOC106372188	1.0041	0.000197663
LOC106396434	aquaporin PIP2-2-like	-1.25249	0.000198638
LOC106451216	uncharacterized LOC106451216	1.05584	0.000198818
LOC106443267	actin-12-like	-10.842	0.000199785
LOC106350551	uncharacterized protein At4g04775-like	1.77086	0.000200065
LOC106361254	arabinogalactan peptide 21-like	-1.12184	0.000200967
LOC106417689	kunitz-type serine protease inhibitor DrTI-like	1.8397	0.000201274
LOC106351958	homeobox-leucine zipper protein ATHB-52-like	1.50623	0.000201662
LOC106387720	glutamate decarboxylase 1-like	-3.62268	0.000201999
LOC106354584	sulfate transporter 2.2-like	-3.34448	0.000204485
LOC106368779	pentatricopeptide repeat-containing protein At2g20540-like	1.98011	0.00020606
[truncated: 689 more rows]

## Sheet: MT VS ST 20
Supplemental Data1. The DEGs between MS mutant and WT at different DAG.
ST: Time after germination of single-stem plants (WT), MT: Time after germination of multi-stems (MS) mutants.
DEGs were selected by p values < 0.05 and absolute values of log2 (fold change) ≥1
Gene ID	Description	log2(FC)	P-value
LOC106438040	zinc finger CCCH domain-containing protein 29-like	4.40731	2.91331e-184
LOC106380990	uncharacterized LOC106380990	9.87381	4.94068e-178
LOC106376336	60S ribosomal protein L8-3	3.63597	6.4204e-122
LOC106409024	ethylene-responsive transcription factor 5-like	5.40599	3.65058e-121
LOC106397077	probable galacturonosyltransferase-like 10	3.80305	1.53002e-118
LOC106348028	U-box domain-containing protein 27	3.44634	4.87186e-118
LOC106347687	probable CCR4-associated factor 1 homolog 9	3.90846	7.05278e-118
LOC106441008	putative nuclease HARBI1	4.86701	6.0376e-117
LOC106400969	DEAD-box ATP-dependent RNA helicase 50-like	-4.23862	1.03681e-114
LOC106349210	probable galacturonosyltransferase 9	6.05998	6.3378e-111
LOC106433369	40S ribosomal protein S24-1	-7.5983	2.71994e-108
LOC106390059	RNA polymerase II C-terminal domain phosphatase-like 4	5.44861	2.30598e-107
LOC106415023	probable galacturonosyltransferase-like 10	4.75911	4.48747e-105
LOC106414112	probable protein phosphatase 2C 63	3.38132	9.19604e-105
LOC106365667	60S ribosomal protein L23	-5.76152	1.33042e-99
LOC106361235	abscisic acid 8'-hydroxylase 3-like	5.72741	2.08602e-96
LOC106401500	U-box domain-containing protein 17-like	3.16821	2.37783e-94
LOC106411343	putative nuclease HARBI1	4.62135	6.51423e-93
LOC106441009	putative nuclease HARBI1	4.73031	6.99112e-92
LOC106368128	nematode resistance protein-like HSPRO1	3.63008	1.00238e-88
LOC106400726	uncharacterized protein At3g06530-like	-5.82364	1.02366e-86
LOC106368130	nematode resistance protein-like HSPRO1	3.68971	9.44236e-84
LOC106408357	E3 ubiquitin-protein ligase RING1-like	3.59114	5.72364e-83
LOC106400534	serine/threonine-protein phosphatase 4 regulatory subunit 3-like	-5.26737	6.3076e-83
LOC106445023	uncharacterized LOC106445023	6.67519	3.43958e-82
LOC106453015	sodium/hydrogen exchanger 2-like	-7.19101	8.82169e-81
LOC106349212	6-phosphogluconate dehydrogenase	3.48411	4.533e-80
LOC106359841	uncharacterized LOC106359841	4.45283	7.25238e-80
LOC106354287	nudix hydrolase 21	5.24204	4.34041e-77
LOC106449566	probable calcium-binding protein CML45	4.12663	7.45606e-77
LOC106370906	uncharacterized LOC106370906	6.69746	5.757e-75
LOC106454829	uncharacterized N-acetyltransferase p20-like	4.70993	1.42758e-73
LOC106416491	abscisic acid 8'-hydroxylase 3-like	4.01318	5.3281e-73
LOC106439365	uncharacterized LOC106439365	2.70652	6.99632e-73
LOC106376270	uncharacterized LOC106376270	2.70536	4.38643e-72
LOC106451073	uncharacterized LOC106451073	3.64388	1.68795e-71
LOC106412179	zinc finger protein ZAT12-like	5.24406	1.73278e-70
LOC106375483	uncharacterized LOC106375483	-8.71153	2.79492e-70
LOC106390013	cytochrome P450 82C4	9.70569	8.66691e-70
LOC106368121	zinc finger CCCH domain-containing protein 47-like	4.02537	2.01968e-69
LOC106365673	probable UDP-N-acetylglucosamine--peptide N-acetylglucosaminyltransferase SEC	-6.57798	2.17991e-69
LOC106411298	transcription factor MYB44-like	3.37829	1.09622e-68
LOC106376088	calcium-binding protein PBP1-like	3.55406	9.3896e-68
LOC106361085	probable protein phosphatase 2C 63	3.34917	2.84484e-67
LOC106415770	nematode resistance protein-like HSPRO1	3.70589	6.89617e-67
LOC106453023	cingulin-like	-4.3125	1.30936e-66
LOC106452082	uncharacterized LOC106452082	6.70324	1.56265e-65
LOC106407494	RNA polymerase II C-terminal domain phosphatase-like 4	4.38209	4.45726e-65
LOC106387890	probable protein phosphatase 2C 25	3.58231	1.48836e-64
LOC106348417	probable protein phosphatase 2C 25	3.81615	1.9063e-63
LOC106450836	zinc finger CCCH domain-containing protein 29-like	4.38864	2.28217e-63
LOC106375664	ethylene-responsive transcription factor ERF105-like	3.39964	3.47207e-63
LOC106371121	probable calcium-binding protein CML30	4.7032	2.56976e-62
LOC106356911	uncharacterized LOC106356911	5.90074	3.16523e-62
LOC106389547	uncharacterized LOC106389547	7.53102	1.09428e-61
LOC106451134	ubiquitin-60S ribosomal protein L40	-4.45328	1.16846e-61
LOC106359462	ethylene-responsive transcription factor 8-like	3.92966	1.15876e-60
LOC106360811	zinc finger CCCH domain-containing protein 47-like	3.71574	1.08697e-59
LOC106361080	uncharacterized LOC106361080	3.70828	1.24374e-59
LOC106388132	exocyst complex component EXO70B1	3.88206	2.15825e-59
LOC106442126	mitochondrial uncoupling protein 4-like	4.83134	3.4367e-59
LOC106416616	ethylene-responsive transcription factor 5-like	4.08666	4.49757e-59
LOC106360802	nematode resistance protein-like HSPRO1	3.66995	4.76083e-59
LOC106447206	E3 ubiquitin-protein ligase RING1-like	3.31394	5.09604e-59
LOC106357116	calcium-binding protein CML24-like	3.1518	4.19941e-58
LOC106449056	probable WRKY transcription factor 46	6.43347	5.22195e-58
LOC106397734	ethylene-responsive transcription factor 5-like	4.06452	5.49508e-58
LOC106365674	40S ribosomal protein S16-3-like	-5.10299	8.55477e-58
LOC106365675	glyceraldehyde-3-phosphate dehydrogenase	-3.69825	1.18898e-57
LOC106443807	F-box protein At4g05010-like	3.34697	3.47889e-57
LOC106445445	uncharacterized LOC106445445	2.75928	5.93073e-57
LOC106401137	uncharacterized LOC106401137	6.11504	7.09117e-57
LOC106446772	uncharacterized LOC106446772	2.77183	1.24444e-56
LOC106413371	xyloglucan 6-xylosyltransferase 1-like	3.22357	1.02661e-55
LOC106345186	uncharacterized LOC106345186	3.89985	2.53576e-55
LOC106367411	protein BPS1	5.59821	2.16744e-54
LOC106404606	ethylene-responsive transcription factor ERF105-like	3.71586	1.38871e-53
LOC106386850	zinc finger protein ZAT12-like	4.47329	1.47577e-53
LOC106400867	uncharacterized LOC106400867	7.86751	5.38779e-53
LOC106375897	calcium-binding protein PBP1-like	3.41891	1.32226e-52
LOC106438373	probable CCR4-associated factor 1 homolog 11	3.98763	3.33109e-52
LOC106418259	uncharacterized LOC106418259	3.96695	3.92534e-52
LOC106399334	calcium-binding protein PBP1	3.87576	4.41564e-52
LOC106436182	E3 ubiquitin-protein ligase RING1-like	2.9978	7.72444e-52
LOC106405982	coleoptile phototropism protein 1-like	-6.31864	2.09563e-51
LOC106387759	putative nuclease HARBI1	4.36854	2.24685e-51
LOC106360694	plasminogen activator inhibitor 1 RNA-binding protein-like	4.65106	2.87251e-51
LOC106410924	uncharacterized LOC106410924	1.77754	1.49977e-50
LOC106366808	acyl-[acyl-carrier-protein] desaturase 5	2.94461	5.04549e-50
LOC106445308	T-complex protein 1 subunit theta-like	-2.48893	9.27867e-50
LOC106367444	uncharacterized WD repeat-containing protein all2124-like	3.55717	2.2237e-49
LOC106416646	zinc finger protein ZAT12-like	4.74617	4.41229e-49
LOC106399657	glutathione S-transferase T3-like	8.39659	6.7013e-49
LOC106362007	uncharacterized LOC106362007	4.25702	8.70494e-49
LOC106346100	serine/threonine-protein phosphatase 4 regulatory subunit 3-like	-4.75617	1.04615e-48
LOC106371281	auxin-responsive protein SAUR32-like	2.98637	2.00433e-48
LOC106358500	calcium uniporter protein 3	4.32722	2.49654e-48
LOC106451769	proteasome subunit beta type-2-A-like	-8.87246	2.68713e-48
LOC106387750	cation/calcium exchanger 2-like	4.99219	7.62195e-48
LOC106354746	WRKY transcription factor 18-like	3.67943	4.2306e-47
LOC106366804	thioredoxin F-type	11.0643	5.77359e-47
LOC106445177	1-aminocyclopropane-1-carboxylate synthase 6	3.68646	9.18019e-47
LOC106449541	glutathione S-transferase T3-like	6.93716	4.80934e-46
LOC106445971	uncharacterized LOC106445971	4.02363	5.86174e-46
LOC106354231	uncharacterized LOC106354231	3.59525	1.32011e-45
LOC106350340	U-box domain-containing protein 18-like	5.24124	1.46454e-45
LOC106384874	tyrosine aminotransferase	2.68258	4.06518e-45
LOC106374554	uncharacterized LOC106374554	2.6651	9.42805e-45
LOC106384828	U-box domain-containing protein 56-like	5.36168	1.48403e-44
LOC106402856	transcription factor MYB44-like	3.77648	2.10082e-44
LOC106349205	uncharacterized protein At1g04910-like	4.65506	2.42288e-44
LOC106390102	calcium-binding protein PBP1-like	3.47512	3.36171e-44
LOC106362991	uncharacterized LOC106362991	9.2486	3.79831e-44
LOC106407133	probable calcium-binding protein CML30	5.13611	9.68686e-44
LOC106401569	uncharacterized LOC106401569	-4.16994	1.60661e-43
LOC106385592	zinc finger protein ZAT12-like	6.57775	4.94326e-43
LOC106450776	disease resistance protein RML1A-like	3.91272	5.3702e-43
LOC106418412	putative nuclease HARBI1	4.37251	6.68122e-43
LOC106372613	40S ribosomal protein S23-2	6.39403	8.79444e-43
LOC106389264	zinc finger protein AZF2-like	3.78692	1.97945e-42
LOC106411324	GATA transcription factor 8-like	2.83258	2.6e-42
LOC106400574	beta-glucosidase-like SFR2	-3.59818	6.54172e-42
LOC106412279	zinc finger protein AZF2-like	3.75085	6.77249e-42
LOC106364567	uncharacterized LOC106364567	2.77707	6.87924e-42
LOC106381605	uncharacterized isomerase BH0283-like	3.47348	8.02396e-42
LOC106352909	transcription factor bHLH148-like	-10.0029	9.17235e-42
LOC106394550	probable WRKY transcription factor 46	6.16191	1.01799e-41
LOC106451757	protein transport protein Sec24-like At3g07100	-8.14227	1.22019e-41
LOC106402016	aldehyde dehydrogenase 22A1-like	-10.688	2.54124e-41
LOC106400945	probable acyl-CoA dehydrogenase IBR3	-2.92417	2.56854e-41
LOC106357763	uncharacterized LOC106357763	3.29624	2.69361e-40
LOC106451321	protein usf-like	2.87757	3.31143e-40
LOC106354843	sodium-coupled neutral amino acid transporter 4-like	2.52464	8.31873e-40
LOC106397604	protein BPS1	3.8891	1.03958e-39
LOC106444940	probable inactive patatin-like protein 9	2.08825	1.86871e-39
LOC106400994	putative chromatin-remodeling complex ATPase chain	-5.13359	3.89788e-39
LOC106358502	uncharacterized LOC106358502	-10.6918	4.01928e-39
LOC106382897	uncharacterized LOC106382897	3.03581	4.0889e-39
LOC106404001	putative F-box protein At3g17620	7.01421	5.50232e-39
LOC106451574	uncharacterized LOC106451574	2.11403	8.69147e-39
LOC106449521	uncharacterized LOC106449521	4.2203	8.75117e-39
LOC106401732	zinc finger CCCH domain-containing protein 29-like	3.84232	1.75531e-38
LOC106439440	formin-like protein 20	2.51658	2.90386e-38
LOC106382365	uncharacterized LOC106382365	2.45706	3.06248e-38
LOC106439403	ethylene-responsive transcription factor 4-like	2.26036	4.19518e-38
LOC106346900	nudix hydrolase 4-like	3.49431	8.19619e-38
LOC106454556	cyclin-U2-1	3.68786	1.07765e-37
LOC106350872	S-adenosylmethionine decarboxylase proenzyme 3-like	3.25662	1.89775e-37
LOC106356752	uncharacterized LOC106356752	9.86999	2.88382e-37
LOC106427808	ethylene-responsive transcription factor 6-like	4.3647	3.44709e-37
LOC106381276	ESCRT-related protein CHMP1B-like	2.22437	4.34761e-37
LOC106418507	E3 ubiquitin-protein ligase RING1-like	3.38736	4.41628e-37
LOC106365663	tryptophan--tRNA ligase	-6.97473	6.78545e-37
LOC106445690	tRNA(His) guanylyltransferase 1	3.08981	1.12369e-36
LOC106390744	uncharacterized LOC106390744	3.94488	2.13168e-36
LOC106453030	alpha-dioxygenase 1	-10.9992	3.2536e-36
LOC106449755	U-box domain-containing protein 5-like	3.14701	4.03136e-36
LOC106360486	dof zinc finger protein DOF1.7-like	3.0864	6.06354e-36
LOC106397375	sodium/hydrogen exchanger 3	-2.96608	6.37241e-36
LOC106382776	ethylene-responsive transcription factor 4-like	2.38768	8.41547e-36
LOC106386038	myb-related protein Myb4-like	6.20773	1.29549e-35
LOC106365672	uncharacterized LOC106365672	-10.012	1.47388e-35
LOC106390509	uncharacterized LOC106390509	-3.66469	1.47796e-35
LOC106358580	protein YLS9-like	2.61224	5.62209e-35
LOC106408214	respiratory burst oxidase homolog protein D-like	3.72884	6.75478e-35
LOC106410879	uncharacterized LOC106410879	3.03116	7.11113e-35
LOC106362004	nudix hydrolase 4-like	2.97346	8.49407e-35
LOC106445320	uncharacterized protein At3g03773-like	-3.35527	9.43236e-35
LOC106391869	type I inositol polyphosphate 5-phosphatase 2-like	2.60222	1.68526e-34
LOC106374743	VQ motif-containing protein 11-like	3.99423	1.84458e-34
LOC106389345	uncharacterized protein At3g27210-like	3.46381	2.03243e-34
LOC106416522	auxin-responsive protein SAUR32-like	2.4508	2.33243e-34
LOC106361058	probable protein phosphatase 2C 63	3.13055	2.48234e-34
LOC106401999	uncharacterized LOC106401999	3.48189	3.22358e-34
LOC106387118	uncharacterized LOC106387118	9.35146	3.50539e-34
LOC106451304	dolichol kinase-like	2.44254	4.55368e-34
LOC106446984	probable protein phosphatase 2C 25	3.77349	4.81663e-34
LOC106385138	zinc finger protein ZAT12-like	3.88599	6.79226e-34
LOC106366833	60S ribosomal protein L32-1	-3.09355	1.68037e-33
LOC106366843	mitochondrial carnitine/acylcarnitine carrier-like protein	4.44801	2.11674e-33
LOC106390377	calcium uniporter protein 3	3.5645	2.24033e-33
LOC106433407	40S ribosomal protein S3a	-19.4641	3.13797e-33
LOC106454791	uncharacterized LOC106454791	2.86292	5.34897e-33
LOC106348866	probable WRKY transcription factor 48	4.34857	5.53135e-33
LOC106441255	uncharacterized LOC106441255	4.04779	7.12226e-33
LOC106387478	exocyst complex component EXO70B1-like	2.80586	8.48906e-33
LOC106447281	tropinone reductase homolog At2g29320-like	-5.02631	8.65681e-33
LOC106404874	acyl-protein thioesterase 1-like	2.21648	1.097e-32
LOC106416521	auxin-responsive protein SAUR32-like	2.47329	1.24406e-32
LOC106407548	F-box protein At4g05010-like	3.40764	1.27251e-32
LOC106405713	putative glycosyltransferase 5	2.1064	1.45562e-32
LOC106347545	E3 ubiquitin-protein ligase RING1-like	2.95581	2.33078e-32
LOC106405530	dynein light chain LC6	3.44506	2.76344e-32
LOC106387662	nudix hydrolase 4	3.01855	3.61102e-32
LOC106345955	disease resistance protein TAO1-like	2.69407	3.71676e-32
LOC106385319	uncharacterized LOC106385319	-2.93757	3.93835e-32
LOC106372626	polyubiquitin	2.96421	8.82721e-32
LOC106349214	uncharacterized LOC106349214	3.38972	1.09341e-31
LOC106349216	uncharacterized LOC106349216	3.22681	1.24838e-31
LOC106351956	calcium-binding protein CML24-like	3.08	1.27413e-31
LOC106376200	uncharacterized LOC106376200	4.09117	1.80958e-31
LOC106354461	uncharacterized LOC106354461	3.01467	1.85718e-31
LOC106454850	uncharacterized LOC106454850	4.44235	1.93518e-31
LOC106358424	photosystem II 5 kDa protein	2.68739	1.97251e-31
LOC106386120	uncharacterized LOC106386120	2.73289	2.3732e-31
LOC106446394	nifU-like protein 4	4.75466	2.47296e-31
LOC106415704	BAG family molecular chaperone regulator 1-like	1.63481	3.38855e-31
LOC106399975	uncharacterized LOC106399975	-2.53378	4.94563e-31
LOC106390639	ethylene-responsive transcription factor 11-like	3.38549	5.15123e-31
LOC106384754	probable CCR4-associated factor 1 homolog 11	3.65906	5.56146e-31
LOC106450288	aquaporin NIP2-1-like	-19.0669	1.21176e-30
LOC106453993	RING-H2 finger protein ATL2-like	2.49169	1.91958e-30
LOC106429199	xyloglucan endotransglucosylase/hydrolase protein 22-like	3.60735	2.98486e-30
LOC106406643	uncharacterized protein At4g22758	1.98321	3.09155e-30
LOC106374324	ethylene-responsive transcription factor ERF014-like	3.8033	3.4895e-30
LOC106381716	cyclin-dependent kinase F-4-like	17.758	3.50701e-30
LOC106366805	pentatricopeptide repeat-containing protein At3g02650	9.89909	3.75876e-30
LOC106433858	protein PIR-like	-3.17701	6.11022e-30
LOC106372529	WRKY transcription factor 18-like	3.67231	6.33024e-30
LOC106368214	probable ubiquitin conjugation factor E4	1.88546	6.70431e-30
LOC106371662	probable CCR4-associated factor 1 homolog 11	4.34797	7.06685e-30
LOC106378422	nucleoid-associated protein PCC8801_2554-like	3.53585	7.35828e-30
LOC106357764	uncharacterized LOC106357764	10.2308	9.03029e-30
LOC106419214	uncharacterized LOC106419214	6.95815	9.69358e-30
LOC106453019	WD repeat-containing protein 48-like	-10.5219	1.08755e-29
LOC106451750	uncharacterized LOC106451750	10.2513	1.63514e-29
LOC106413825	uncharacterized LOC106413825	3.89561	1.64899e-29
LOC106418130	polyribonucleotide nucleotidyltransferase 1	2.42491	2.25511e-29
LOC106405618	uncharacterized LOC106405618	-3.33037	3.30265e-29
LOC106389821	uncharacterized LOC106389821	3.43487	3.90824e-29
LOC106368428	uncharacterized LOC106368428	3.14539	4.07183e-29
LOC106438518	probable disease resistance protein At4g33300	2.76948	4.52305e-29
LOC106357219	uncharacterized LOC106357219	3.60412	8.33177e-29
LOC106376755	formin-like protein 7	2.07609	8.62785e-29
LOC106443670	probable WRKY transcription factor 46	4.85194	1.01468e-28
LOC106348908	probable E3 ubiquitin-protein ligase DTX3	3.08687	1.16986e-28
LOC106346110	protein DEHYDRATION-INDUCED 19 homolog 4-like	-19.0191	1.35285e-28
LOC106453624	uncharacterized LOC106453624	1.60828	1.75159e-28
LOC106411287	probable WRKY transcription factor 11	2.43389	1.81088e-28
LOC106423986	ethylene-responsive transcription factor ERF013-like	4.10524	1.83286e-28
LOC106359180	zinc finger protein ZAT10-like	4.63198	1.84697e-28
LOC106435104	uncharacterized LOC106435104	2.48425	1.87423e-28
LOC106453049	uncharacterized LOC106453049	-3.45398	2.13183e-28
LOC106356337	ethylene-responsive transcription factor 11-like	3.23369	2.35434e-28
LOC106371663	transcription repressor OFP10	5.588	2.85933e-28
LOC106381440	uncharacterized LOC106381440	13.1667	3.06345e-28
LOC106450063	uncharacterized N-acetyltransferase p20-like	3.76346	3.93949e-28
LOC106371791	serine/arginine repetitive matrix protein 1	1.36672	4.27584e-28
LOC106410758	calcium-dependent protein kinase 32	3.00893	4.41154e-28
LOC106408610	U-box domain-containing protein 5-like	3.01148	5.06961e-28
LOC106438835	kinesin-like protein KIF22-B	-4.91204	6.11339e-28
LOC106387044	E3 ubiquitin-protein ligase RING1-like	2.33164	7.8733e-28
LOC106397199	ethylene-responsive transcription factor ERF104-like	3.86508	8.15825e-28
LOC106394391	phospholipase A1-Igamma1	6.00738	9.24573e-28
LOC106388214	uncharacterized LOC106388214	2.05966	1.15022e-27
LOC106395992	uncharacterized LOC106395992	4.52189	1.45457e-27
LOC106354386	putative glycosyltransferase 5	2.14501	1.46673e-27
LOC106367342	uncharacterized WD repeat-containing protein all2124-like	2.81311	1.72829e-27
LOC106397329	probable histone-arginine methyltransferase 1.3	-8.71424	2.21539e-27
LOC106367351	uncharacterized WD repeat-containing protein all2124-like	2.84424	2.52252e-27
LOC106443900	E3 ubiquitin-protein ligase RLIM	3.02642	3.35066e-27
LOC106376365	xyloglucan 6-xylosyltransferase 1-like	1.75227	3.45949e-27
LOC106365668	uncharacterized LOC106365668	-17.0248	3.60987e-27
LOC106438394	uncharacterized LOC106438394	3.83596	3.75282e-27
LOC106397087	protein DEHYDRATION-INDUCED 19 homolog 4-like	-18.182	4.01417e-27
LOC106348804	probable WRKY transcription factor 48	3.51101	4.14665e-27
LOC106407094	ethylene-responsive transcription factor ERF104-like	3.8474	5.37194e-27
LOC106400541	60S ribosomal protein L29-1-like	-11.9854	5.95511e-27
LOC106385736	uncharacterized LOC106385736	4.3229	6.81263e-27
LOC106437772	receptor like protein kinase S.2-like	2.52175	7.70447e-27
LOC106390156	uncharacterized LOC106390156	17.8043	1.17078e-26
LOC106376484	B2 protein-like	2.87816	1.1769e-26
LOC106385105	uncharacterized LOC106385105	3.53172	1.25274e-26
LOC106397166	zinc finger CCCH domain-containing protein 34	-8.87856	1.27185e-26
LOC106381308	nudix hydrolase 21	4.02078	2.61095e-26
LOC106391536	protein YLS9-like	2.58513	3.01622e-26
LOC106353885	polyadenylation and cleavage factor homolog 1-like	4.24468	3.41313e-26
LOC106345838	zinc finger CCCH domain-containing protein 29-like	4.30943	3.4687e-26
LOC106437664	uncharacterized LOC106437664	4.404	3.74221e-26
LOC106454340	uncharacterized LOC106454340	-17.561	4.86371e-26
LOC106418540	zinc finger A20 and AN1 domain-containing stress-associated protein 6-like	1.30383	4.90121e-26
LOC106453007	trafficking protein particle complex subunit 6B-like	-2.04877	5.43431e-26
LOC106397395	transcription factor bHLH148-like	-3.39739	5.67197e-26
LOC106451497	uncharacterized LOC106451497	-7.13078	5.81469e-26
LOC106354732	probable WRKY transcription factor 11	1.8776	6.23772e-26
LOC106393635	rop guanine nucleotide exchange factor 11-like	2.18549	7.86662e-26
LOC106452370	DCN1-like protein 2	1.7168	1.01941e-25
LOC106366803	WAT1-related protein At3g02690	8.44758	1.03869e-25
LOC106402269	probable disease resistance protein At4g33300	3.09197	1.10291e-25
LOC106380691	uncharacterized LOC106380691	3.40253	1.17106e-25
LOC106390436	uncharacterized LOC106390436	-4.62936	1.21241e-25
LOC106354394	UPF0496 protein 1-like	1.82104	1.31298e-25
LOC106411855	probable receptor-like protein kinase At1g33260	2.66315	1.47334e-25
LOC106451569	uncharacterized LOC106451569	3.86122	1.55741e-25
LOC106375449	UDP-glucuronate 4-epimerase 1	1.71987	1.63327e-25
LOC106418001	uncharacterized LOC106418001	4.12249	1.93344e-25
LOC106357281	uncharacterized LOC106357281	4.78826	2.24766e-25
LOC106399337	uncharacterized N-acetyltransferase p20	3.38848	2.27529e-25
LOC106415275	probable purine permease 14	1.99916	2.44488e-25
LOC106438147	probable WRKY transcription factor 33	3.35295	2.50578e-25
LOC106347543	uncharacterized LOC106347543	16.1613	2.98683e-25
LOC106376372	xyloglucan 6-xylosyltransferase 1-like	1.72297	3.28592e-25
LOC106387627	protein YLS9-like	2.91261	3.40054e-25
LOC106385598	uncharacterized LOC106385598	-17.8292	3.49454e-25
LOC106392805	UDP-glucuronate 4-epimerase 1	1.65426	3.79396e-25
LOC106387184	ubiquitin carboxyl-terminal hydrolase 23-like	2.97595	3.96861e-25
LOC106439445	RING-H2 finger protein ATL2-like	4.47484	4.05316e-25
LOC106400578	3-dehydrosphinganine reductase TSC10A	-2.46729	4.5524e-25
LOC106451751	uncharacterized LOC106451751	18.2371	5.68187e-25
LOC106366726	WD repeat-containing protein 44	4.18703	6.13449e-25
LOC106345841	uncharacterized LOC106345841	12.3504	6.87934e-25
LOC106375354	probable disease resistance protein At4g33300	2.98678	8.36789e-25
LOC106418461	probable galactinol--sucrose galactosyltransferase 1	3.7468	8.61471e-25
LOC106362233	uncharacterized LOC106362233	1.70859	8.77828e-25
LOC106370669	uncharacterized LOC106370669	4.01806	1.0401e-24
LOC106445724	uncharacterized LOC106445724	2.7641	1.05828e-24
LOC106364420	uncharacterized LOC106364420	16.8447	1.15011e-24
LOC106445354	glucan endo-1	2.79925	1.16662e-24
LOC106404843	VQ motif-containing protein 10-like	5.58773	1.4237e-24
LOC106381714	cyclin-dependent kinase F-4-like	16.4486	1.48592e-24
LOC106411150	transcription initiation factor TFIID subunit 3-like	2.96814	1.52105e-24
LOC106451871	zinc transporter ZTP29	-2.09206	1.63068e-24
LOC106348749	twist-related protein 1-like	1.81846	1.65538e-24
LOC106453012	acyl carrier protein	-18.0432	1.76662e-24
LOC106440321	uncharacterized LOC106440321	-8.47524	1.80116e-24
LOC106443038	U-box domain-containing protein 5-like	2.30799	1.84713e-24
LOC106347647	arogenate dehydratase 4	2.61739	2.1364e-24
LOC106382828	classical arabinogalactan protein 1-like	3.41807	2.43872e-24
LOC106411288	probable xyloglucan endotransglucosylase/hydrolase protein 18	2.76432	2.47859e-24
LOC106392141	uncharacterized LOC106392141	2.34651	2.50804e-24
LOC106409269	phospholipase A1-Igamma1	6.53276	2.65315e-24
LOC106382827	classical arabinogalactan protein 1-like	3.4145	3.13981e-24
LOC106450400	protein LURP-one-related 10-like	3.82433	3.21337e-24
LOC106385297	uncharacterized LOC106385297	4.1209	3.66632e-24
LOC106446112	cingulin-like	2.92348	4.77964e-24
LOC106410925	probable WRKY transcription factor 33	3.45706	4.9553e-24
LOC106451432	uncharacterized LOC106451432	11.0419	5.20279e-24
LOC106411042	serine/threonine-protein kinase At5g01020-like	1.89538	5.24212e-24
LOC106451429	uncharacterized LOC106451429	11.0469	5.26006e-24
LOC106346660	uncharacterized LOC106346660	2.05815	6.00199e-24
LOC106399120	rab proteins geranylgeranyltransferase component A 2-like	-16.8699	6.04189e-24
LOC106400542	60S ribosomal protein L29-1-like	-11.3927	7.14534e-24
LOC106418564	zinc finger A20 and AN1 domain-containing stress-associated protein 6-like	1.32578	7.50394e-24
LOC106451841	uncharacterized LOC106451841	16.9514	8.28452e-24
LOC106372621	protein phosphatase 2C 70-like	5.88966	8.36292e-24
LOC106408965	probable calcium-binding protein CML16	2.20271	8.56399e-24
LOC106453021	probable polygalacturonase	-16.2185	8.85062e-24
LOC106386605	uncharacterized LOC106386605	-2.12028	9.49936e-24
LOC106354158	ethylene-responsive transcription factor ERF021-like	5.49032	1.08183e-23
LOC106455070	uncharacterized LOC106455070	-7.56853	1.30708e-23
LOC106454688	uncharacterized LOC106454688	2.47806	1.4054e-23
LOC106381782	GDSL esterase/lipase At5g45960-like	1.79005	1.47841e-23
LOC106378985	cysteine-rich repeat secretory protein 12-like	2.79842	1.59835e-23
LOC106406682	probable WRKY transcription factor 70	2.97026	1.72735e-23
LOC106364402	uncharacterized LOC106364402	16.8754	1.87936e-23
LOC106360372	uncharacterized LOC106360372	1.76202	2.0957e-23
LOC106409187	phospholipase A1-Igamma1	6.44582	2.74254e-23
LOC106390598	uncharacterized LOC106390598	8.17947	2.77037e-23
LOC106450211	uncharacterized LOC106450211	2.50461	2.82544e-23
LOC106351730	zinc finger protein ZAT8-like	6.26569	3.23685e-23
LOC106372487	MADS-box protein FLOWERING LOCUS C-like	2.90879	3.25934e-23
LOC106382485	E3 ubiquitin-protein ligase RNF4-like	4.30639	3.2599e-23
LOC106399346	RING-H2 finger protein ATL72-like	2.97369	3.36526e-23
LOC106397795	uncharacterized LOC106397795	6.65756	3.42789e-23
LOC106356254	myb-related protein Myb4-like	4.8221	3.45054e-23
LOC106397633	uncharacterized LOC106397633	3.37219	3.95022e-23
LOC106349123	uncharacterized LOC106349123	3.97695	4.16701e-23
LOC106453020	coiled-coil domain-containing protein 12-like	-17.5867	5.04815e-23
LOC106396206	aquaporin NIP2-1	-17.0359	5.247e-23
LOC106347213	uncharacterized LOC106347213	-3.9524	5.27928e-23
LOC106383054	uncharacterized LOC106383054	2.69912	5.60117e-23
LOC106345744	dynein light chain LC6	3.13128	6.07366e-23
LOC106368372	uncharacterized LOC106368372	11.8573	6.43114e-23
LOC106374028	uncharacterized LOC106374028	-8.77186	6.54078e-23
LOC106418302	NAC domain-containing protein 62-like	3.02957	8.24932e-23
LOC106361226	uncharacterized LOC106361226	3.27152	8.2638e-23
LOC106387487	uncharacterized LOC106387487	15.5019	8.77499e-23
LOC106390601	40S ribosomal protein S23-2	3.55311	9.52325e-23
LOC106401993	LRR receptor-like serine/threonine-protein kinase ERL1	1.77081	1.00483e-22
LOC106413846	uncharacterized LOC106413846	3.28859	1.1367e-22
LOC106358151	RING-H2 finger protein ATL2-like	3.88909	1.24683e-22
LOC106453709	putative calcium-transporting ATPase 13	4.80456	1.26648e-22
LOC106371603	uncharacterized LOC106371603	-16.5582	1.40073e-22
LOC106453002	uncharacterized LOC106453002	-16.4468	1.51813e-22
LOC106387748	zinc finger protein VAR3	3.35584	1.76063e-22
LOC106444313	uncharacterized LOC106444313	2.61754	2.42654e-22
LOC106451752	uncharacterized LOC106451752	17.9416	2.86872e-22
LOC106390261	uncharacterized protein At1g76660-like	4.15361	3.2044e-22
LOC106398694	thioredoxin-like protein AAED1	4.13028	3.23575e-22
LOC106358308	transcription factor MYB44-like	2.89909	3.64863e-22
LOC106440761	probable purine permease 14	3.77388	3.9407e-22
LOC106361221	uncharacterized LOC106361221	3.11085	4.12747e-22
LOC106449060	BON1-associated protein 1-like	3.31694	4.31191e-22
LOC106353941	uncharacterized LOC106353941	3.3341	5.4956e-22
LOC106443160	PITH domain-containing protein At3g04780-like	-17.1023	6.05933e-22
LOC106438080	uncharacterized LOC106438080	3.63841	6.44545e-22
LOC106352885	CAS1 domain-containing protein 1-like	-15.698	6.70402e-22
LOC106380873	heat shock protein 90-2-like	2.00761	8.46101e-22
LOC106351536	uncharacterized LOC106351536	8.3499	8.49393e-22
LOC106382175	exocyst complex component EXO70B1-like	1.74399	8.93631e-22
LOC106445727	protein argonaute 2-like	1.77869	1.07352e-21
LOC106440134	zinc finger A20 and AN1 domain-containing stress-associated protein 2-like	1.297	1.10546e-21
LOC106451747	uncharacterized LOC106451747	16.3031	1.14682e-21
LOC106369008	uncharacterized LOC106369008	2.43273	1.31408e-21
LOC106409076	uncharacterized LOC106409076	3.46985	1.72264e-21
LOC106350879	ethylene-responsive transcription factor ERF014-like	3.35757	1.75942e-21
LOC106382813	uncharacterized LOC106382813	2.47585	1.82353e-21
LOC106440325	heat stress transcription factor A-4a-like	2.40854	1.8362e-21
LOC106354484	probable LRR receptor-like serine/threonine-protein kinase RPK1	1.31156	1.92768e-21
LOC106450052	U-box domain-containing protein 19	3.63014	1.94419e-21
LOC106353988	heat stress transcription factor A-8-like	2.55161	2.0315e-21
LOC106438055	nematode resistance protein-like HSPRO2	2.33066	2.0809e-21
LOC106453029	GDSL esterase/lipase At3g05180	-7.27399	2.14094e-21
LOC106441147	probable protein phosphatase 2C 63	1.74375	2.33928e-21
LOC106362990	uncharacterized LOC106362990	16.7544	2.37585e-21
LOC106396784	ethylene-responsive transcription factor ERF021-like	5.42302	2.39787e-21
LOC106362739	probable disease resistance protein At5g66890	16.6166	2.66443e-21
LOC106382744	ethylene-responsive transcription factor ERF104-like	5.23765	2.75605e-21
LOC106366819	mitochondrial carnitine/acylcarnitine carrier-like protein	3.32039	3.31568e-21
LOC106372588	uncharacterized LOC106372588	2.37847	3.52602e-21
LOC106400946	twist-related protein 1-like	-16.7047	3.80879e-21
LOC106444966	xyloglucan 6-xylosyltransferase 1-like	1.78924	4.74909e-21
LOC106348562	probable disease resistance protein At5g66900	2.51539	5.1228e-21
LOC106389628	bifunctional 3-dehydroquinate dehydratase/shikimate dehydrogenase	-15.4564	5.45905e-21
LOC106451075	protein transport protein yos1-like	3.08695	5.52718e-21
LOC106406809	uncharacterized LOC106406809	2.82519	6.07606e-21
LOC106452335	uncharacterized LOC106452335	2.25665	6.58162e-21
LOC106381674	disease resistance RPP13-like protein 4	-3.85787	6.81158e-21
LOC106385313	uncharacterized LOC106385313	4.04742	7.13804e-21
LOC106392378	uncharacterized LOC106392378	15.9226	7.17374e-21
LOC106371532	xyloglucan endotransglucosylase/hydrolase protein 22-like	2.58661	7.48415e-21
LOC106377562	uncharacterized LOC106377562	2.00397	7.84167e-21
LOC106397336	probable histone-arginine methyltransferase 1.3	-2.99951	7.9191e-21
LOC106427637	protein YLS9-like	4.49531	7.93104e-21
LOC106392207	uncharacterized LOC106392207	3.15762	8.54908e-21
LOC106395414	transcription factor TCP22-like	1.74861	9.18819e-21
LOC106394225	9-cis-epoxycarotenoid dioxygenase NCED3	1.67139	1.01265e-20
LOC106369987	uncharacterized LOC106369987	5.68338	1.11145e-20
LOC106396207	aquaporin NIP2-1-like	-16.527	1.19521e-20
LOC106438380	glutamate dehydrogenase 2-like	1.5672	1.38836e-20
LOC106453000	pyruvate dehydrogenase (acetyl-transferring) kinase	5.58589	1.39674e-20
LOC106453001	elongation of fatty acids protein 3-like	2.46943	1.53515e-20
LOC106351532	uncharacterized LOC106351532	8.20019	1.58318e-20
LOC106361103	probable disease resistance protein At4g33300	1.99244	1.72369e-20
LOC106391680	zinc finger AN1 and C2H2 domain-containing stress-associated protein 11-like	2.30509	1.73442e-20
LOC106353754	sucrose transport protein SUC1-like	1.68362	1.73886e-20
LOC106391799	zinc finger CCCH domain-containing protein 34-like	-15.5534	1.83741e-20
LOC106358147	leucine-rich repeat extensin-like protein 5	3.13696	2.11703e-20
LOC106386324	uncharacterized LOC106386324	3.38064	2.15747e-20
LOC106413314	calcium-dependent protein kinase 32-like	4.02463	2.28204e-20
LOC106361246	E3 ubiquitin-protein ligase RING1-like	15.5953	2.44028e-20
LOC106357601	uncharacterized LOC106357601	3.39645	2.92716e-20
LOC106367111	uncharacterized LOC106367111	8.47197	2.94651e-20
LOC106453071	trafficking protein particle complex subunit 6B-like	1.66684	3.33173e-20
LOC106382472	putative E3 ubiquitin-protein ligase XBAT34	3.42164	3.4595e-20
LOC106381760	uncharacterized LOC106381760	-17.9403	3.74397e-20
LOC106449191	60S ribosomal protein L23-like	-17.3118	3.79632e-20
LOC106414272	uncharacterized LOC106414272	4.61469	3.82377e-20
LOC106353820	uncharacterized LOC106353820	2.5154	4.63719e-20
LOC106415083	uncharacterized LOC106415083	-3.27726	4.84837e-20
LOC106386617	serine/threonine-protein kinase ULK4-like	2.34527	5.06188e-20
LOC106446122	WRKY transcription factor 18-like	3.43529	5.13354e-20
LOC106438654	probable glycerol-3-phosphate acyltransferase 3	2.54158	5.34329e-20
LOC106450964	probable galacturonosyltransferase 7	1.43843	5.58666e-20
LOC106388380	uncharacterized LOC106388380	2.13859	5.97246e-20
LOC106448040	transcription factor MYB44-like	2.93322	5.98817e-20
LOC106412439	uncharacterized LOC106412439	15.4782	6.17336e-20
LOC106345267	U-box domain-containing protein 5-like	2.74248	6.34831e-20
LOC106356074	uncharacterized LOC106356074	2.17414	6.36045e-20
LOC106411750	uncharacterized LOC106411750	2.3917	7.30505e-20
LOC106365670	inositol phosphorylceramide glucuronosyltransferase 1-like	-15.5341	7.36769e-20
LOC106365665	protein EIN4	-7.30826	8.32965e-20
LOC106345171	uncharacterized LOC106345171	15.5861	8.71691e-20
LOC106403316	jacalin-related lectin 4-like	1.6366	9.21461e-20
LOC106354351	putative glycosyltransferase 5	2.54441	9.99271e-20
LOC106351824	dehydration-responsive element-binding protein 1D-like	5.60606	1.00748e-19
LOC106372578	probable serine/threonine-protein kinase NAK	4.32482	1.02729e-19
LOC106397314	elongation of fatty acids protein 3-like	-3.50142	1.09965e-19
LOC106368427	uncharacterized LOC106368427	4.01845	1.24748e-19
LOC106401769	SH3 and multiple ankyrin repeat domains protein 1-like	-3.11102	1.28709e-19
LOC106451763	sterol 3-beta-glucosyltransferase UGT80A2-like	-14.9074	1.35893e-19
LOC106348669	uncharacterized LOC106348669	1.89135	1.37684e-19
LOC106379209	uncharacterized LOC106379209	-7.44107	1.39788e-19
LOC106417917	uncharacterized LOC106417917	3.38149	1.48055e-19
LOC106354399	HVA22-like protein a	-3.93936	1.59042e-19
LOC106397170	60S ribosomal protein L22-2-like	-1.92746	1.63254e-19
LOC106393801	transcription factor MYB44-like	2.91204	1.6438e-19
LOC106415421	mitochondrial chaperone BCS1-like	1.7289	1.78367e-19
LOC106375268	lysine histidine transporter-like 7	2.52408	1.92986e-19
LOC106396143	transcription factor MYB108-like	2.65934	2.00909e-19
LOC106450652	uncharacterized protein At1g76660-like	3.85403	2.05383e-19
LOC106451428	disease resistance-like protein CSA1	13.908	2.21374e-19
LOC106402418	E3 ubiquitin-protein ligase PUB22-like	3.83331	2.34294e-19
LOC106404375	receptor-like protein 12	4.29644	2.44177e-19
LOC106399976	binding partner of ACD11 1-like	3.5624	2.6799e-19
LOC106450828	nematode resistance protein-like HSPRO2	2.0251	2.72793e-19
LOC106371057	replication protein A 70 kDa DNA-binding subunit A-like	-15.0438	2.74773e-19
LOC106454642	uncharacterized protein At5g01610-like	2.20163	2.76309e-19
LOC106398771	uncharacterized LOC106398771	3.52954	2.9433e-19
LOC106387563	uncharacterized LOC106387563	3.77683	2.99191e-19
LOC106356201	uncharacterized LOC106356201	15.5028	3.09023e-19
LOC106365654	WRKY transcription factor 22-like	2.22222	3.19052e-19
LOC106433386	protein HASTY 1-like	-14.3158	3.4187e-19
LOC106345193	uncharacterized LOC106345193	15.939	3.43077e-19
LOC106452422	zinc finger A20 and AN1 domain-containing stress-associated protein 6-like	2.43586	3.4681e-19
LOC106450658	EGF domain-specific O-linked N-acetylglucosamine transferase-like	2.94618	3.63737e-19
LOC106417876	uncharacterized LOC106417876	14.9843	3.77373e-19
LOC106355279	septum-promoting GTP-binding protein 1-like	3.01551	4.13977e-19
LOC106347620	haloacid dehalogenase-like hydrolase domain-containing protein At3g48420	-15.8767	4.20444e-19
LOC106452211	uncharacterized LOC106452211	15.1157	4.20601e-19
LOC106400623	xyloglucan endotransglucosylase/hydrolase protein 22-like	2.70948	4.49549e-19
LOC106453004	uncharacterized LOC106453004	-14.0989	4.5979e-19
LOC106386036	uncharacterized protein At4g14450	2.92421	5.33261e-19
LOC106406261	UPF0496 protein 1-like	1.79251	5.33472e-19
LOC106361222	uncharacterized LOC106361222	3.12709	5.38947e-19
LOC106441826	tonoplast dicarboxylate transporter-like	4.34189	5.42336e-19
LOC106346103	ubiquitin-like-specific protease 1A	-5.94301	5.49123e-19
LOC106381715	uncharacterized LOC106381715	6.63691	5.5716e-19
LOC106447279	tropinone reductase homolog At2g29370-like	-3.54034	5.73776e-19
LOC106418491	uncharacterized LOC106418491	-3.67346	5.90725e-19
LOC106349530	uncharacterized LOC106349530	2.0957	6.93624e-19
LOC106365047	ethylene-responsive transcription factor ERF022-like	6.96638	7.50091e-19
LOC106443726	probable WRKY transcription factor 53	3.30798	8.07367e-19
LOC106348958	respiratory burst oxidase homolog protein D	3.09541	8.31601e-19
LOC106453854	CBL-interacting serine/threonine-protein kinase 17	2.56258	8.36822e-19
LOC106384672	putative geranylgeranyl pyrophosphate synthase 8	-16.4001	8.61316e-19
LOC106447488	uncharacterized LOC106447488	1.91226	9.34785e-19
LOC106407079	uncharacterized LOC106407079	2.80097	9.36563e-19
LOC106444036	auxin-responsive protein IAA19-like	1.81596	1.0365e-18
LOC106346112	thioredoxin-like protein CITRX	-16.5143	1.09507e-18
LOC106397788	uncharacterized LOC106397788	-15.701	1.13041e-18
LOC106451761	guanine nucleotide-binding protein-like NSN1	-14.9287	1.15817e-18
LOC106428268	transcription factor DIVARICATA-like	2.0542	1.21149e-18
LOC106388330	uncharacterized LOC106388330	-15.5849	1.24361e-18
LOC106372476	E3 ubiquitin-protein ligase RING1-like	4.02914	1.25945e-18
LOC106449823	uncharacterized LOC106449823	-3.27997	1.32044e-18
LOC106404568	uncharacterized LOC106404568	3.28055	1.33063e-18
LOC106359762	uncharacterized LOC106359762	1.96998	1.38182e-18
LOC106351985	uncharacterized LOC106351985	4.67252	1.48902e-18
LOC106379665	uncharacterized LOC106379665	15.5028	1.48999e-18
LOC106451723	uncharacterized LOC106451723	1.70669	1.5141e-18
LOC106454997	uncharacterized LOC106454997	15.6894	1.53083e-18
LOC106451609	E3 ubiquitin-protein ligase CCNB1IP1 homolog	1.92231	1.9423e-18
LOC106345589	auxin-responsive protein SAUR71	4.17734	2.01021e-18
LOC106363404	50S ribosomal protein HLP	4.83488	2.09914e-18
LOC106433487	uncharacterized LOC106433487	-6.97327	2.10899e-18
LOC106365180	classical arabinogalactan protein 2-like	3.88722	2.15522e-18
LOC106396283	probable galacturonosyltransferase-like 10	3.77589	2.31201e-18
LOC106399215	uncharacterized LOC106399215	3.50362	2.31916e-18
LOC106441757	uncharacterized LOC106441757	13.9877	2.36924e-18
LOC106348300	uncharacterized LOC106348300	15.794	2.50805e-18
LOC106361223	uncharacterized LOC106361223	3.1147	2.56403e-18
LOC106438832	trafficking protein particle complex subunit 4-like	-2.43081	2.71332e-18
LOC106418673	U-box domain-containing protein 25-like	1.71553	2.77227e-18
LOC106451351	uncharacterized LOC106451351	2.53136	2.90355e-18
LOC106444146	uncharacterized protein At4g14450	2.93629	3.36065e-18
LOC106346108	multiple organellar RNA editing factor 3	-15.8081	4.12146e-18
LOC106399410	uncharacterized LOC106399410	2.71749	4.2804e-18
LOC106450209	uncharacterized LOC106450209	2.59952	4.70285e-18
LOC106451102	protein CHUP1	4.70768	4.78534e-18
LOC106366720	B2 protein-like	3.24495	5.02347e-18
LOC106449395	3-deoxy-manno-octulosonate cytidylyltransferase	2.13379	5.12585e-18
LOC106441883	glycerol-3-phosphate 2-O-acyltransferase 4-like	-6.96916	5.22884e-18
LOC106350887	uncharacterized LOC106350887	15.2219	5.35098e-18
LOC106387754	F-box protein At1g11270-like	15.1387	5.48388e-18
LOC106381294	putative receptor-like protein kinase At1g72540	5.45529	5.5691e-18
LOC106346061	splicing factor U2af large subunit B-like	1.44497	5.65159e-18
LOC106386139	uncharacterized LOC106386139	16.0393	5.84628e-18
LOC106352924	uncharacterized LOC106352924	-14.7685	6.01875e-18
LOC106442134	uncharacterized LOC106442134	3.71575	6.63061e-18
LOC106359414	tonoplast dicarboxylate transporter-like	4.13754	7.00818e-18
LOC106345398	uncharacterized LOC106345398	15.353	7.35305e-18
LOC106386323	uncharacterized LOC106386323	3.04591	7.67089e-18
LOC106402817	probable WRKY transcription factor 40	5.33386	7.74001e-18
LOC106378797	uncharacterized LOC106378797	1.73947	8.10089e-18
LOC106397480	peptidyl-prolyl cis-trans isomerase CYP21-4	-15.9145	8.18915e-18
LOC106415796	scarecrow-like protein 5	-3.23624	8.21708e-18
LOC106450185	formin-like protein 7	1.80062	8.54628e-18
LOC106397655	ATP-dependent DNA helicase Q-like 1	-3.21256	8.79406e-18
LOC106451356	ATP-dependent zinc metalloprotease FtsH-like	4.46997	9.52891e-18
LOC106389825	nuclear pore complex protein NUP58-like	2.80607	1.01231e-17
LOC106368206	calcium-dependent protein kinase 32-like	4.1604	1.07105e-17
LOC106388183	protein LURP-one-related 5	2.9033	1.11338e-17
LOC106382251	probably inactive leucine-rich repeat receptor-like protein kinase At5g48380	2.76042	1.19467e-17
LOC106455021	uncharacterized LOC106455021	-14.9554	1.27839e-17
LOC106427192	PRA1 family protein B5-like	2.31206	1.28124e-17
LOC106426123	uncharacterized LOC106426123	2.50714	1.40934e-17
LOC106400741	uncharacterized LOC106400741	3.50728	1.53307e-17
LOC106441138	leucine-rich repeat extensin-like protein 3	3.13862	1.62852e-17
LOC106435447	uncharacterized LOC106435447	2.38655	1.89219e-17
LOC106389255	uncharacterized LOC106389255	-3.39865	2.06767e-17
LOC106452343	putative DUF21 domain-containing protein At3g13070	2.38706	2.29641e-17
LOC106372614	uncharacterized LOC106372614	9.15478	2.48181e-17
LOC106361789	uncharacterized LOC106361789	-6.18578	2.57468e-17
LOC106387141	uncharacterized LOC106387141	2.79941	2.65225e-17
LOC106359868	uncharacterized LOC106359868	-2.77829	2.70969e-17
LOC106399485	uncharacterized LOC106399485	15.1608	2.80606e-17
LOC106396942	COBRA-like protein 8	2.4176	2.8339e-17
LOC106451431	uncharacterized LOC106451431	14.6694	2.8518e-17
LOC106354817	probable WRKY transcription factor 40	4.22061	2.8749e-17
LOC106400624	xyloglucan endotransglucosylase/hydrolase protein 22-like	2.57638	2.90274e-17
LOC106387988	leucine-rich repeat receptor-like serine/threonine/tyrosine-protein kinase SOBIR1	2.68085	3.19249e-17
LOC106405531	uncharacterized LOC106405531	14.0498	3.21531e-17
LOC106366487	uncharacterized LOC106366487	-14.583	3.25571e-17
LOC106366814	40S ribosomal protein S7	1.15689	3.31088e-17
LOC106445723	checkpoint protein hus1-like	-2.559	3.48051e-17
LOC106391490	uncharacterized LOC106391490	14.3388	3.56316e-17
LOC106453198	inositol-phosphate phosphatase	3.60664	3.81896e-17
LOC106440982	uncharacterized protein At4g22758-like	1.98008	3.87762e-17
LOC106381762	3-oxoacyl-[acyl-carrier-protein] synthase I	-9.98089	4.05379e-17
LOC106352877	rab proteins geranylgeranyltransferase component A 2-like	-14.6847	4.10876e-17
LOC106400581	50S ribosomal protein L7/L12	-1.66664	4.68111e-17
LOC106406444	cysteine-rich receptor-like protein kinase 10	3.16028	4.7921e-17
LOC106388887	classical arabinogalactan protein 3-like	3.67684	5.4237e-17
LOC106453011	uncharacterized LOC106453011	-9.33772	5.60939e-17
LOC106385546	1-aminocyclopropane-1-carboxylate synthase 11-like	4.49917	5.73298e-17
LOC106388139	E3 ubiquitin-protein ligase PUB23	3.10005	5.83556e-17
LOC106352945	huntingtin-interacting protein K-like	-16.2093	5.96578e-17
LOC106382299	uncharacterized LOC106382299	3.71413	6.21714e-17
LOC106415626	UDP-D-apiose/UDP-D-xylose synthase 2-like	-1.97981	6.32665e-17
LOC106411557	protein HAIKU1-like	1.534	6.35186e-17
LOC106357765	wiskott-Aldrich syndrome protein family member 2-like	15.073	6.56555e-17
LOC106347418	NAC domain-containing protein 62-like	2.79327	6.66767e-17
LOC106381019	probable pectin methyltransferase QUA2	1.63596	6.88489e-17
LOC106366420	zinc finger CCCH domain-containing protein 44-like	1.06132	7.67735e-17
LOC106382553	uncharacterized LOC106382553	-6.07913	7.68966e-17
LOC106386232	uncharacterized LOC106386232	-15.0265	8.10738e-17
LOC106382107	glycine-rich RNA-binding protein RZ1A-like	1.8242	8.31103e-17
LOC106451357	ATP-dependent zinc metalloprotease FtsH-like	4.63803	8.64785e-17
LOC106398677	ABC transporter G family member 33-like	3.44033	9.10931e-17
LOC106382133	uncharacterized LOC106382133	-14.9965	9.11101e-17
LOC106365635	putative glucuronosyltransferase PGSIP8	3.15138	9.49427e-17
LOC106362995	E3 ubiquitin-protein ligase At1g63170-like	3.10092	9.52665e-17
LOC106351570	putative L-type lectin-domain containing receptor kinase V.2	14.2501	1.00889e-16
LOC106361225	uncharacterized LOC106361225	3.05	1.03336e-16
LOC106406449	TMV resistance protein N-like	2.03324	1.05609e-16
LOC106380594	peroxisomal (S)-2-hydroxy-acid oxidase GLO3-like	-15.437	1.14009e-16
LOC106345219	ethylene-responsive transcription factor ERF022-like	6.17346	1.15621e-16
LOC106381694	glutathionyl-hydroquinone reductase YqjG-like	1.60247	1.19891e-16
LOC106401838	uncharacterized LOC106401838	4.32153	1.22475e-16
LOC106365666	AT-hook motif nuclear-localized protein 14-like	-14.7755	1.22919e-16
LOC106352568	receptor-like serine/threonine-protein kinase NCRK	2.52029	1.25151e-16
LOC106359617	uncharacterized LOC106359617	2.06007	1.30037e-16
LOC106386140	uncharacterized LOC106386140	7.302	1.36513e-16
LOC106396862	EGF domain-specific O-linked N-acetylglucosamine transferase-like	3.05942	1.40585e-16
LOC106381207	PRA1 family protein F3-like	2.55214	1.45852e-16
LOC106368046	calmodulin-binding protein 25-like	1.97515	1.63923e-16
LOC106406593	DEAD-box ATP-dependent RNA helicase 14-like	11.2605	1.68499e-16
LOC106396944	uncharacterized LOC106396944	2.45373	1.69431e-16
LOC106402510	monothiol glutaredoxin-S15	2.19164	1.69824e-16
LOC106406037	cytochrome c oxidase subunit 5b-1	1.40548	1.86948e-16
LOC106346667	U-box domain-containing protein 25-like	1.75079	1.88053e-16
LOC106389703	uncharacterized LOC106389703	2.80426	2.1289e-16
LOC106348750	protein DEHYDRATION-INDUCED 19 homolog 4-like	2.1969	2.43076e-16
LOC106349213	FHA domain-containing protein At4g14490-like	7.06395	3.05711e-16
LOC106399475	uncharacterized LOC106399475	6.47009	3.10326e-16
LOC106374666	U-box domain-containing protein 21-like	2.79304	3.10938e-16
LOC106348915	peptidyl-prolyl cis-trans isomerase FKBP65-like	3.54777	3.30902e-16
LOC106424347	AP2/ERF and B3 domain-containing transcription factor ARF14-like	4.49949	3.37387e-16
LOC106372176	30S ribosomal protein 3-2	-2.78759	3.64607e-16
LOC106369011	probable inactive poly [ADP-ribose] polymerase SRO5	2.81035	4.16008e-16
LOC106399724	L-Ala-D/L-amino acid epimerase-like	-15.6008	4.16389e-16
LOC106369993	uncharacterized LOC106369993	2.15754	4.18117e-16
LOC106377300	uncharacterized LOC106377300	-7.45632	4.27016e-16
LOC106349208	probable tRNA (guanine(26)-N(2))-dimethyltransferase 2	14.0878	4.30825e-16
LOC106415721	tetraspanin-8-like	2.93837	4.31233e-16
LOC106347734	uncharacterized protein At2g33490-like	1.36496	4.31513e-16
LOC106360509	protein trichome berefringence-like 7	1.40836	4.43094e-16
LOC106451124	zinc finger A20 and AN1 domain-containing stress-associated protein 4-like	2.08261	4.8081e-16
LOC106346114	GATA transcription factor 15-like	-15.508	4.85914e-16
LOC106445309	uncharacterized LOC106445309	-13.7775	5.14229e-16
LOC106445318	uncharacterized LOC106445318	-12.4419	5.1814e-16
LOC106451426	uncharacterized LOC106451426	14.8235	5.33766e-16
LOC106368638	tetraspanin-8	3.24477	5.41307e-16
LOC106376331	MLP-like protein 328	-5.52936	5.43576e-16
LOC106411933	uncharacterized LOC106411933	2.43048	5.49413e-16
LOC106367641	pectinesterase 1-like	3.97544	5.80188e-16
LOC106406457	TMV resistance protein N-like	2.24747	5.82973e-16
LOC106453459	myb-related protein Myb4-like	14.4745	6.31408e-16
LOC106399214	uncharacterized LOC106399214	3.52141	6.66539e-16
LOC106389745	protein TRAUCO-like	1.63531	7.42703e-16
LOC106347202	uncharacterized LOC106347202	14.7285	7.57555e-16
LOC106376342	uncharacterized LOC106376342	14.3331	7.67416e-16
LOC106402419	uncharacterized LOC106402419	1.45431	7.97775e-16
LOC106387111	glutathione gamma-glutamylcysteinyltransferase 1-like	2.87284	8.63992e-16
LOC106347965	protein EXORDIUM-like 2	2.13578	8.7364e-16
LOC106365664	tryptophan--tRNA ligase	-15.8072	9.16555e-16
LOC106382777	uncharacterized LOC106382777	2.461	9.62499e-16
LOC106390499	ras-related protein RABF2a	1.44853	9.83492e-16
LOC106446286	protein QUIRKY-like	-2.89824	1.00944e-15
LOC106368045	calmodulin-binding protein 25-like	2.04165	1.03218e-15
LOC106398395	disease resistance protein TAO1-like	3.65396	1.04305e-15
LOC106402021	hsp70-Hsp90 organizing protein 3	1.9468	1.05868e-15
LOC106380926	protein kinase 2A	3.2094	1.08444e-15
LOC106414286	uncharacterized LOC106414286	5.5259	1.08647e-15
LOC106448264	ethylene-overproduction protein 1-like	1.2775	1.15916e-15
LOC106431766	senescence-associated carboxylesterase 101-like	1.65183	1.19511e-15
LOC106385210	uncharacterized LOC106385210	1.47874	1.24491e-15
LOC106401717	CAS1 domain-containing protein 1-like	-4.77437	1.37503e-15
LOC106450986	RHOMBOID-like protein 2	1.26798	1.39314e-15
LOC106353218	uncharacterized LOC106353218	1.1061	1.58153e-15
LOC106454769	ethylene-responsive transcription factor ERF012-like	2.5572	1.58497e-15
LOC106413946	molybdenum cofactor sulfurase-like	1.70503	1.6293e-15
LOC106394406	uncharacterized LOC106394406	2.1902	1.63532e-15
LOC106453035	uncharacterized LOC106453035	-15.0915	1.80653e-15
LOC106347729	acyltransferase-like protein At3g26840	1.72719	1.80944e-15
LOC106417459	ras-associated and pleckstrin homology domains-containing protein 1-like	1.91176	1.82435e-15
LOC106386583	inositol phosphorylceramide glucuronosyltransferase 1-like	2.46138	1.87371e-15
LOC106453006	cytadherence high molecular weight protein 2-like	-14.0103	1.92118e-15
LOC106450731	uncharacterized LOC106450731	-15.0679	2.04122e-15
LOC106383071	ABC transporter G family member 36-like	2.50943	2.09926e-15
LOC106440313	nudix hydrolase 7-like	3.00933	2.11626e-15
LOC106445245	calmodulin-binding protein 25-like	2.07509	2.21821e-15
LOC106354162	probable choline kinase 1	2.46275	2.37052e-15
LOC106390073	U-box domain-containing protein 56-like	4.50826	2.4718e-15
LOC106397196	probable cysteine proteinase At4g11310	1.89064	2.47199e-15
LOC106415257	sugar transporter ERD6-like	1.24493	2.52954e-15
LOC106389186	ethylene-responsive transcription factor 4-like	1.99199	2.53889e-15
LOC106356270	uncharacterized LOC106356270	4.49535	2.59126e-15
LOC106416182	syntaxin-121-like	2.98033	2.69429e-15
LOC106438193	protein kinase 2B	1.40193	2.75596e-15
LOC106362022	60S ribosomal protein L22-2-like	-2.36419	3.14109e-15
LOC106402495	heme-binding-like protein At3g10130	3.48577	3.14932e-15
LOC106345316	uncharacterized LOC106345316	2.67323	3.22792e-15
LOC106453059	gibberellin receptor GID1A	1.9555	3.37062e-15
LOC106348748	probable acyl-CoA dehydrogenase IBR3	1.58723	3.71443e-15
LOC106361710	calcium-transporting ATPase 1	2.09006	3.72412e-15
LOC106363942	uncharacterized protein At4g14450	3.96476	4.12349e-15
LOC106386625	F-box/FBD/LRR-repeat protein At5g18770-like	2.2124	4.16926e-15
LOC106451439	replication protein A 70 kDa DNA-binding subunit B-like	3.36284	4.20042e-15
LOC106367827	E3 ubiquitin-protein ligase PUB22	3.36269	4.20284e-15
LOC106401620	probable inactive receptor kinase At1g27190	1.49646	4.26498e-15
LOC106381126	heat stress transcription factor A-8-like	2.51453	4.38725e-15
LOC106400130	shaggy-related protein kinase gamma-like	-1.61819	4.45587e-15
LOC106376901	septum-promoting GTP-binding protein 1-like	2.46652	4.62717e-15
LOC106385303	50S ribosomal protein 6	7.07574	5.02583e-15
LOC106397278	protein trichome birefringence-like 38	1.53542	5.228e-15
LOC106345312	uncharacterized LOC106345312	2.64892	5.37337e-15
LOC106444678	uncharacterized LOC106444678	3.50728	5.91136e-15
LOC106382536	phosphoglucan	1.12436	5.9345e-15
LOC106415084	uncharacterized LOC106415084	-3.19505	6.18046e-15
LOC106381285	nuclear transcription factor Y subunit A-3-like	1.99658	6.30974e-15
LOC106366810	delta(7)-sterol-C5(6)-desaturase 1-like	2.79855	6.32835e-15
LOC106352437	uncharacterized LOC106352437	8.39463	6.44471e-15
LOC106403065	protein kinase 2B	1.9221	6.46372e-15
LOC106397237	probable E3 ubiquitin ligase SUD1	-13.9765	6.46995e-15
LOC106368887	uncharacterized LOC106368887	2.33511	6.6659e-15
LOC106372424	probable sugar phosphate/phosphate translocator At5g25400	1.28579	7.09755e-15
LOC106445898	uncharacterized LOC106445898	9.9498	7.13682e-15
LOC106451402	probable glutathione peroxidase 2	-2.64404	7.52737e-15
LOC106452270	uncharacterized LOC106452270	1.38664	7.56865e-15
LOC106381875	bax inhibitor 1	2.65209	7.58604e-15
LOC106375480	protein trichome birefringence-like	1.35869	7.88909e-15
LOC106381389	uncharacterized LOC106381389	14.4929	7.96534e-15
LOC106376576	uncharacterized LOC106376576	9.94028	8.59555e-15
LOC106399299	uncharacterized LOC106399299	1.5829	9.02831e-15
LOC106388886	putative clathrin assembly protein At4g40080	1.32789	9.15531e-15
LOC106381700	cyclin-T1-5-like	1.17005	1.01215e-14
LOC106352799	uncharacterized LOC106352799	-15.6331	1.10829e-14
LOC106396863	uncharacterized LOC106396863	9.88822	1.15499e-14
LOC106351222	protein LURP-one-related 10-like	3.34552	1.17201e-14
LOC106386629	50S ribosomal protein L33-like	2.14873	1.20144e-14
LOC106396362	probable protein phosphatase 2C 49	3.11729	1.2131e-14
LOC106446699	deSI-like protein At4g17486	1.91131	1.2696e-14
LOC106445315	putative H/ACA ribonucleoprotein complex subunit 1-like protein 1	-2.28159	1.37594e-14
LOC106397180	protein HAIKU1-like	1.63948	1.47453e-14
LOC106364782	uncharacterized LOC106364782	-14.9853	1.48277e-14
LOC106416747	cinnamoyl-CoA reductase 2-like	3.98612	1.51371e-14
LOC106367239	protein LYK5-like	2.39289	1.61667e-14
LOC106407424	F-box protein PP2-B1-like	2.10722	1.61826e-14
LOC106374655	uncharacterized LOC106374655	2.04383	1.64098e-14
LOC106370649	dehydration-responsive element-binding protein 3-like	2.90668	1.68802e-14
LOC106384810	NADPH--cytochrome P450 reductase 2-like	-11.6503	1.69117e-14
LOC106414311	AT-hook motif nuclear-localized protein 27	4.96556	1.70723e-14
LOC106386325	uncharacterized LOC106386325	3.40636	1.70896e-14
LOC106445135	uncharacterized LOC106445135	14.4909	1.86778e-14
LOC106390878	transcription factor MYB44-like	3.12106	1.86882e-14
LOC106400140	uncharacterized LOC106400140	-14.4114	1.89419e-14
LOC106371939	probable arabinosyltransferase ARAD1	3.03534	1.89469e-14
LOC106390231	transcription factor SPATULA-like	3.04678	2.17466e-14
LOC106361881	myosin heavy chain kinase B-like	2.51046	2.20419e-14
LOC106452336	RNA-binding protein PNO1 pseudogene	1.45627	2.20608e-14
LOC106438319	uncharacterized LOC106438319	1.37864	2.2133e-14
LOC106445976	uncharacterized LOC106445976	-6.66304	2.22893e-14
LOC106372117	uncharacterized LOC106372117	2.41451	2.2421e-14
LOC106381781	uncharacterized LOC106381781	13.8126	2.28785e-14
LOC106386265	uncharacterized LOC106386265	15.3236	2.31267e-14
LOC106347780	NAC domain-containing protein 62-like	2.82499	2.32563e-14
LOC106397086	SH3 and multiple ankyrin repeat domains protein 1-like	-3.57928	2.36368e-14
LOC106366184	uncharacterized LOC106366184	5.49177	2.39566e-14
LOC106346104	INO80 complex subunit B-like	-14.3129	2.4004e-14
LOC106396518	protein kinase 2A	3.44994	2.65004e-14
LOC106442795	probable xyloglucan endotransglucosylase/hydrolase protein 23	4.218	2.70888e-14
LOC106431344	putative F-box protein At3g23420	3.39593	2.88277e-14
LOC106399101	serine/threonine-protein phosphatase 4 regulatory subunit 3-like	-14.5307	2.8902e-14
LOC106389873	uncharacterized LOC106389873	1.45626	2.948e-14
LOC106453045	protein ALWAYS EARLY 2	-1.65057	2.97925e-14
LOC106451464	protein DJ-1 homolog B-like	1.76614	3.04826e-14
LOC106447977	uncharacterized LOC106447977	-14.0972	3.12917e-14
LOC106415624	mitochondrial uncoupling protein 5-like	2.86794	3.251e-14
LOC106390058	zinc finger protein AZF2-like	3.83839	3.54341e-14
LOC106358534	transcription factor DIVARICATA-like	1.98994	3.61974e-14
LOC106380925	protein kinase 2A	4.38025	3.84369e-14
LOC106387282	pentatricopeptide repeat-containing protein At3g02650	-1.56624	3.94842e-14
LOC106406475	uncharacterized LOC106406475	1.84723	4.22225e-14
LOC106352748	probable protein phosphatase 2C 35	-13.8952	4.30308e-14
LOC106442611	uncharacterized LOC106442611	-7.68729	4.54285e-14
LOC106348421	NAC domain-containing protein 62-like	1.59986	4.60682e-14
LOC106414640	subtilisin-like protease SBT1.6	3.02535	4.79034e-14
LOC106345162	uncharacterized LOC106345162	14.52	4.80026e-14
LOC106385536	1-aminocyclopropane-1-carboxylate synthase 11	4.36459	4.84941e-14
LOC106451121	zinc finger A20 and AN1 domain-containing stress-associated protein 4-like	1.88541	5.24847e-14
LOC106415542	uncharacterized LOC106415542	1.38423	5.29689e-14
LOC106367140	probable magnesium transporter NIPA8	2.16124	5.31913e-14
LOC106402125	L-Ala-D/L-amino acid epimerase-like	-15.0604	5.40748e-14
LOC106381778	uncharacterized LOC106381778	-14.1875	5.44547e-14
LOC106386642	probable disease resistance protein RPP1	1.87331	5.46555e-14
LOC106446335	B2 protein-like	2.4969	5.60368e-14
LOC106418205	uncharacterized LOC106418205	14.6279	5.67612e-14
LOC106452601	thioredoxin-like protein AAED1	1.24218	5.70623e-14
LOC106368566	putative clathrin assembly protein At2g25430	1.58411	5.96938e-14
LOC106451303	dolichol kinase-like	1.59041	6.03357e-14
LOC106377547	uncharacterized LOC106377547	2.05889	6.13182e-14
LOC106357661	UPF0496 protein At5g66675	1.57767	6.15516e-14
LOC106418649	NAC domain-containing protein 62-like	2.75927	6.24791e-14
LOC106392031	uncharacterized LOC106392031	1.37922	6.25966e-14
LOC106454437	uncharacterized LOC106454437	5.19727	6.70106e-14
LOC106376385	L-type lectin-domain containing receptor kinase VII.1	1.54344	6.9368e-14
LOC106451031	uncharacterized LOC106451031	9.79637	7.12766e-14
LOC106361653	U-box domain-containing protein 17-like	1.1001	7.23214e-14
LOC106417614	uncharacterized LOC106417614	2.06514	7.38187e-14
LOC106376449	uncharacterized LOC106376449	2.38835	7.57271e-14
LOC106365836	uncharacterized LOC106365836	5.96436	7.57736e-14
LOC106348419	NEDD8-conjugating enzyme Ubc12-like	-15.1214	7.60256e-14
LOC106386627	FBD-associated F-box protein At5g18780-like	-4.5879	7.95388e-14
LOC106372579	trafficking protein particle complex subunit 4-like	1.41469	8.19349e-14
LOC106354526	pathogenesis-related protein 5-like	-14.7314	8.2639e-14
LOC106386882	L-type lectin-domain containing receptor kinase I.9-like	-2.91795	8.34636e-14
LOC106345254	uncharacterized LOC106345254	2.96658	8.47574e-14
LOC106407719	uncharacterized LOC106407719	-13.7552	8.72268e-14
LOC106402618	uncharacterized LOC106402618	1.69168	9.04035e-14
LOC106345645	protein RALF-like 22	1.42598	9.43239e-14
LOC106451820	NAC domain-containing protein 16-like	2.23907	9.59205e-14
LOC106402548	serine/threonine-protein kinase OXI1	2.938	9.87582e-14
LOC106384518	protein NRT1/ PTR FAMILY 2.10-like	1.344	9.96972e-14
LOC106357156	uncharacterized LOC106357156	1.45565	9.98738e-14
LOC106389631	uncharacterized LOC106389631	-13.9435	1.06741e-13
LOC106372368	uncharacterized LOC106372368	1.22545	1.12045e-13
LOC106453027	sugar transporter ERD6-like 11	-3.33853	1.13229e-13
LOC106412085	uncharacterized LOC106412085	1.62857	1.14365e-13
LOC106382132	uncharacterized LOC106382132	-14.0414	1.14918e-13
LOC106454118	uncharacterized LOC106454118	9.62132	1.15605e-13
LOC106391653	uncharacterized LOC106391653	13.3161	1.15861e-13
LOC106392105	uncharacterized LOC106392105	13.6185	1.17783e-13
LOC106406807	auxin-responsive protein IAA19	2.11549	1.194e-13
LOC106364257	E3 ubiquitin-protein ligase RHA1B-like	1.73944	1.21385e-13
LOC106363706	mitochondrial uncoupling protein 5-like	2.84353	1.29913e-13
LOC106397623	probable E3 ubiquitin ligase SUD1	-13.1889	1.3138e-13
LOC106387280	uncharacterized LOC106387280	-1.48407	1.33291e-13
LOC106396941	mitochondrial uncoupling protein 4	3.24593	1.37992e-13
LOC106396334	ethylene-responsive transcription factor 13-like	5.93535	1.3962e-13
LOC106414944	uncharacterized LOC106414944	1.62417	1.41301e-13
LOC106452796	serine/threonine-protein kinase HT1-like	1.27772	1.42412e-13
LOC106453005	probable protein S-acyltransferase 17	-14.1743	1.46214e-13
LOC106401486	glyoxysomal fatty acid beta-oxidation multifunctional protein MFP-a-like	-3.2706	1.50648e-13
LOC106399980	uncharacterized LOC106399980	-14.0194	1.59626e-13
LOC106439368	9-cis-epoxycarotenoid dioxygenase NCED3	1.57627	1.63292e-13
LOC106353825	uncharacterized LOC106353825	1.59371	1.76152e-13
LOC106377301	uncharacterized LOC106377301	-6.44185	1.80389e-13
LOC106364166	uncharacterized LOC106364166	13.5053	1.85342e-13
LOC106375581	UDP-glucuronate 4-epimerase 6-like	1.05876	1.99793e-13
LOC106352619	uncharacterized LOC106352619	-5.32296	2.00991e-13
LOC106438616	uncharacterized LOC106438616	2.6311	2.09805e-13
LOC106450434	fasciclin-like arabinogalactan protein 18	1.14531	2.14339e-13
LOC106452479	probable disease resistance protein RPP1	1.80713	2.15153e-13
LOC106444652	ethylene-responsive transcription factor ERF120-like	15.1327	2.16752e-13
LOC106452466	CBL-interacting serine/threonine-protein kinase 14-like	2.58696	2.25095e-13
LOC106415751	uncharacterized LOC106415751	1.49795	2.2636e-13
LOC106439137	uncharacterized LOC106439137	1.10681	2.30436e-13
LOC106410675	disease resistance protein RPS6-like	3.48419	2.36414e-13
LOC106387218	putative glycosyltransferase 5	1.2661	2.40766e-13
LOC106388158	F-box/LRR-repeat protein At2g43260-like	2.9598	2.42041e-13
LOC106364157	homeobox-leucine zipper protein ATHB-53-like	3.41431	2.50805e-13
LOC106446515	uncharacterized LOC106446515	2.30774	2.51967e-13
LOC106443234	uncharacterized LOC106443234	13.4529	2.54515e-13
LOC106381705	probable disease resistance protein At5g45490	1.19183	2.75235e-13
LOC106381497	wall-associated receptor kinase-like 22	-3.68119	2.8916e-13
LOC106364867	uncharacterized LOC106364867	2.77386	2.90115e-13
LOC106358245	auxin-responsive protein SAUR61-like	3.41102	2.91522e-13
LOC106387753	microfibrillar-associated protein 1-like	1.51046	2.94162e-13
LOC106420416	uncharacterized LOC106420416	-13.9851	3.03882e-13
LOC106352955	serine/threonine-protein kinase PAK 3-like	-3.30056	3.0415e-13
LOC106392363	uncharacterized LOC106392363	2.646	3.07778e-13
LOC106440486	cytochrome P450 71A1-like	1.68101	3.09929e-13
LOC106404184	probable tRNA (guanine(26)-N(2))-dimethyltransferase 2	-1.92001	3.10998e-13
LOC106347483	uncharacterized LOC106347483	2.03655	3.23992e-13
LOC106445158	protein YLS9-like	1.09373	3.26817e-13
LOC106397621	uncharacterized LOC106397621	13.9977	3.31545e-13
LOC106370350	uncharacterized LOC106370350	14.451	3.33393e-13
LOC106454439	mitochondrial inner membrane protease ATP23	-14.5975	3.37995e-13
LOC106390817	cytochrome b561 and DOMON domain-containing protein At5g35735-like	3.25275	3.47695e-13
LOC106415996	calcium-dependent protein kinase 32-like	3.60923	3.56642e-13
LOC106452212	uncharacterized LOC106452212	14.274	3.56752e-13
LOC106351533	uncharacterized LOC106351533	14.7279	3.6056e-13
LOC106352823	serine/threonine-protein kinase WNK2-like	-3.56134	3.61566e-13
LOC106381717	uncharacterized LOC106381717	3.14565	3.69768e-13
LOC106412175	BON1-associated protein 1-like	1.85801	3.88729e-13
LOC106353168	aspartic proteinase nepenthesin-2-like	2.32995	3.96542e-13
LOC106379418	probable disease resistance protein RPP1	2.7408	4.00501e-13
LOC106350186	uncharacterized LOC106350186	14.4131	4.1017e-13
LOC106375019	uncharacterized LOC106375019	3.48319	4.27e-13
LOC106440678	dehydration-responsive element-binding protein 2A-like	2.91653	4.3869e-13
LOC106378711	RNA polymerase II C-terminal domain phosphatase-like 4	1.34673	4.42255e-13
LOC106366310	subtilisin-like protease SBT1.7	5.36414	4.46862e-13
LOC106386039	myb-related protein Myb4-like	5.08814	4.51988e-13
LOC106386751	dolichyl-diphosphooligosaccharide--protein glycosyltransferase subunit STT3A-like	1.19264	4.85408e-13
LOC106390565	xanthoxin dehydrogenase-like	2.09643	4.9194e-13
LOC106382353	uncharacterized LOC106382353	2.55017	5.15682e-13
LOC106390593	protein phosphatase 2C 70-like	3.01703	5.23609e-13
LOC106445709	uncharacterized LOC106445709	-2.93816	5.32289e-13
LOC106401375	tetraspanin-8-like	2.30237	5.48484e-13
LOC106417731	uncharacterized LOC106417731	4.7241	5.5934e-13
LOC106418575	bax inhibitor 1-like	1.7674	5.59503e-13
LOC106394995	uncharacterized LOC106394995	-14.931	5.6279e-13
LOC106399639	protein RALF-like 27	1.21141	6.50611e-13
LOC106356436	auxin-responsive protein SAUR61-like	3.36767	6.57899e-13
LOC106390406	TBC1 domain family member 10B	1.07168	7.06802e-13
LOC106441046	chaperone protein ClpB1-like	1.72105	7.07088e-13
LOC106345802	pectinesterase 1-like	2.10038	7.6677e-13
LOC106369074	uncharacterized LOC106369074	2.29445	7.71531e-13
LOC106356945	calcium-binding protein CML38-like	2.44446	7.93361e-13
LOC106360406	uncharacterized LOC106360406	1.50805	7.96795e-13
LOC106366339	calcium-dependent protein kinase 28-like	3.28919	8.09736e-13
LOC106364664	uncharacterized LOC106364664	14.1008	8.18635e-13
LOC106390800	cytochrome b561 and DOMON domain-containing protein At5g35735-like	3.24445	8.21598e-13
LOC106353802	putative receptor-like protein kinase At4g00960	2.33063	8.23983e-13
LOC106346483	zinc finger protein AZF2-like	3.24279	8.65147e-13
LOC106410825	protein SPA1-RELATED 4-like	1.73048	9.00765e-13
LOC106441470	probable WRKY transcription factor 53	3.05301	9.6171e-13
LOC106413874	universal stress protein A-like protein	1.01287	9.80503e-13
LOC106377653	E3 ubiquitin-protein ligase RHA1B-like	1.68357	9.83078e-13
LOC106375281	transcription factor MYB32-like	1.80292	1.03753e-12
LOC106366815	cyclin-B1-2-like	14.3001	1.04715e-12
LOC106387746	NADH--cytochrome b5 reductase 1	1.70307	1.1266e-12
LOC106394709	uncharacterized LOC106394709	13.118	1.13432e-12
LOC106381966	uncharacterized LOC106381966	-1.60839	1.16818e-12
LOC106388796	probable glycerol-3-phosphate acyltransferase 3	2.2482	1.18109e-12
LOC106352660	putative E3 ubiquitin-protein ligase XBAT34	2.90274	1.19233e-12
LOC106406020	calmodulin-2/4-like	1.81973	1.29932e-12
LOC106447673	probable WRKY transcription factor 33	4.1874	1.3857e-12
LOC106368000	sigma factor binding protein 1	2.60356	1.39525e-12
LOC106400538	proline-rich antigen homolog	-14.6387	1.43969e-12
LOC106377544	uncharacterized LOC106377544	1.44001	1.46068e-12
LOC106400537	proline-rich antigen homolog	-14.5718	1.46508e-12
LOC106382134	uncharacterized LOC106382134	-5.24458	1.48706e-12
LOC106378881	uncharacterized LOC106378881	-14.359	1.49616e-12
LOC106406680	ethylene-responsive transcription factor ERF021-like	5.35905	1.49898e-12
LOC106369953	uncharacterized LOC106369953	-11.7788	1.50422e-12
LOC106438935	uncharacterized LOC106438935	1.15311	1.51744e-12
LOC106346113	uncharacterized LOC106346113	-14.9134	1.53082e-12
LOC106387147	beta-glucosidase 3-like	2.40005	1.59005e-12
LOC106357806	cyclin-K-like	2.28663	1.63974e-12
LOC106366033	60S ribosomal protein L13-3-like	1.50078	1.73143e-12
LOC106363123	U-box domain-containing protein 17-like	1.12276	1.80543e-12
LOC106454977	ABC transporter G family member 24-like	-12.7115	1.81875e-12
LOC106438156	putative glycerol-3-phosphate transporter 1	2.18837	1.82265e-12
LOC106368064	sigma factor binding protein 1	2.15684	1.86217e-12
LOC106357009	ethylene-responsive transcription factor ERF018-like	3.3037	1.94406e-12
LOC106440097	receptor-like protein kinase FERONIA	1.09816	1.95026e-12
LOC106447544	probable calcium-binding protein CML35	1.49868	1.98423e-12
LOC106347119	uncharacterized LOC106347119	-2.70036	2.01052e-12
LOC106401687	galactokinase-like	-8.04096	2.01981e-12
LOC106376739	12-oxophytodienoate reductase 1-like	1.91258	2.02374e-12
LOC106401596	thymidine kinase-like	2.52197	2.03729e-12
LOC106380766	cation/calcium exchanger 2-like	3.24383	2.07113e-12
LOC106367811	zinc finger A20 and AN1 domain-containing stress-associated protein 6-like	2.1834	2.16024e-12
LOC106445151	syntaxin-122-like	3.74273	2.16338e-12
LOC106381462	uncharacterized LOC106381462	1.41568	2.20559e-12
LOC106401121	leucine-rich repeat receptor-like serine/threonine/tyrosine-protein kinase SOBIR1	2.63256	2.23073e-12
LOC106354126	uncharacterized LOC106354126	1.94395	2.29154e-12
LOC106423067	WRKY transcription factor 44-like	2.56863	2.33012e-12
LOC106390394	serine/threonine-protein kinase BIK1-like	3.22616	2.36429e-12
LOC106377540	calcium-transporting ATPase 8	1.40062	2.37962e-12
LOC106407399	zinc finger protein AZF2-like	3.59235	2.38768e-12
LOC106443063	uncharacterized LOC106443063	-14.4855	2.39235e-12
LOC106406119	alpha-dioxygenase 2-like	3.47564	2.44882e-12
LOC106411792	dihydroneopterin aldolase 1-like	2.82984	2.47195e-12
LOC106349106	uncharacterized protein At1g04910-like	-1.42752	2.49381e-12
LOC106375840	protein LYK5-like	2.48344	2.52749e-12
LOC106367016	phospholipase D gamma 1	1.80876	2.63455e-12
LOC106449328	cytochrome P450 87A3-like	2.22999	2.6733e-12
LOC106366828	probable methyltransferase PMT14	-4.89107	2.71405e-12
LOC106359854	uncharacterized LOC106359854	-13.664	2.73297e-12
LOC106381115	probable protein phosphatase 2C 15	1.91012	2.78905e-12
LOC106388797	probable glycerol-3-phosphate acyltransferase 3	2.41585	2.80157e-12
LOC106384808	probable xyloglucan endotransglucosylase/hydrolase protein 17	4.2084	2.85167e-12
LOC106393595	glycine-rich RNA-binding protein 2	-14.9002	2.86185e-12
LOC106439756	calmodulin-like protein 12	2.84411	2.89023e-12
LOC106388384	UDP-glycosyltransferase 76D1-like	2.57773	2.92442e-12
LOC106375678	uncharacterized LOC106375678	2.63141	2.94195e-12
LOC106440437	B3 domain-containing protein REM9-like	-13.7399	2.95736e-12
LOC106409538	uncharacterized LOC106409538	1.97405	3.02426e-12
LOC106352208	probable galacturonosyltransferase 9	-1.57981	3.19136e-12
LOC106346238	probable purine permease 16	1.62727	3.4238e-12
LOC106443199	uncharacterized LOC106443199	-2.47924	3.50901e-12
LOC106418314	uncharacterized LOC106418314	1.78295	3.51586e-12
LOC106370222	uncharacterized LOC106370222	13.8309	3.52057e-12
LOC106402699	uncharacterized LOC106402699	-1.85267	3.59273e-12
LOC106388031	uncharacterized LOC106388031	2.09533	3.64978e-12
LOC106352674	probable calcium-binding protein CML45	3.67552	3.92239e-12
LOC106372457	uncharacterized LOC106372457	6.21554	4.06289e-12
LOC106387446	uncharacterized LOC106387446	-2.86492	4.07851e-12
LOC106359474	uncharacterized LOC106359474	-14.9607	4.18993e-12
LOC106345639	uncharacterized LOC106345639	-15.4239	4.22605e-12
LOC106424541	uncharacterized LOC106424541	2.98958	4.34038e-12
LOC106369983	uncharacterized LOC106369983	1.66488	4.35549e-12
LOC106358231	auxin-responsive protein SAUR61-like	3.29072	4.37143e-12
LOC106410534	proline-rich receptor-like protein kinase PERK1	1.13204	4.69555e-12
LOC106398793	phenylalanine ammonia-lyase 1-like	1.74374	4.74818e-12
LOC106450955	probable WRKY transcription factor 33	4.17604	4.77165e-12
LOC106398518	keratin	5.47366	4.88988e-12
LOC106372150	tRNA (guanosine(18)-2'-O)-methyltransferase-like	1.14275	5.02422e-12
LOC106454015	probable disease resistance protein RPP1	2.31789	5.04957e-12
LOC106397772	4-coumarate--CoA ligase 4-like	3.59224	5.17384e-12
LOC106416336	uncharacterized LOC106416336	1.7179	5.2649e-12
LOC106406136	uncharacterized LOC106406136	3.7128	5.26498e-12
LOC106349457	uncharacterized LOC106349457	3.85875	5.29863e-12
LOC106441616	G-type lectin S-receptor-like serine/threonine-protein kinase At2g19130	2.58684	5.30538e-12
LOC106409325	uncharacterized LOC106409325	-13.538	5.31385e-12
LOC106406135	uncharacterized LOC106406135	3.91383	5.45985e-12
LOC106411505	uncharacterized LOC106411505	2.05072	5.63605e-12
LOC106363248	zinc finger BED domain-containing protein RICESLEEPER 2-like	-13.3146	5.66825e-12
LOC106363247	zinc finger BED domain-containing protein RICESLEEPER 2-like	-12.9251	5.73936e-12
LOC106403511	adenosine kinase 2-like	-2.75774	5.78734e-12
LOC106391710	cyclic nucleotide-gated ion channel 1-like	1.46828	5.8194e-12
LOC106353636	methionine adenosyltransferase 2 subunit beta-like	1.22095	6.19812e-12
LOC106449400	uncharacterized LOC106449400	-13.8939	6.32438e-12
LOC106401734	V-type proton ATPase catalytic subunit A-like	1.12919	6.3504e-12
LOC106410637	probable acyl-activating enzyme 18	1.97464	6.38719e-12
LOC106353895	probable serine/threonine-protein kinase At1g18390	4.0166	6.77986e-12
LOC106433437	putative ankyrin repeat protein RF_0381	-13.3392	6.89739e-12
LOC106383226	uncharacterized LOC106383226	5.95758	6.92471e-12
LOC106368514	probable protein phosphatase 2C 49	2.572	7.0132e-12
LOC106392102	uncharacterized LOC106392102	13.1637	7.11594e-12
LOC106413757	uncharacterized LOC106413757	3.81659	7.53511e-12
LOC106374555	uncharacterized LOC106374555	2.57245	7.57687e-12
LOC106357583	haloacid dehalogenase-like hydrolase domain-containing protein At3g48420	-14.2123	7.78774e-12
LOC106353847	uncharacterized LOC106353847	1.41751	7.84331e-12
LOC106413995	membrane-anchored ubiquitin-fold protein 4-like	3.19269	7.88242e-12
LOC106389573	calcium-transporting ATPase 1	2.01234	8.13158e-12
LOC106359444	uncharacterized LOC106359444	2.4068	8.20238e-12
LOC106381973	uncharacterized GPI-anchored protein At3g06035-like	-2.26069	8.40785e-12
LOC106400539	proline-rich antigen homolog	-6.83401	8.51808e-12
LOC106357489	DNA polymerase I B	-1.59178	8.62738e-12
LOC106402738	uncharacterized protein At2g33490-like	2.18785	8.6324e-12
LOC106374722	F-box protein VBF-like	4.04153	8.69832e-12
LOC106405620	probable disease resistance protein At4g33300	1.63753	8.94881e-12
LOC106451290	cytochrome b5 isoform B-like	1.31876	8.97462e-12
LOC106393587	uncharacterized LOC106393587	3.0747	9.16094e-12
LOC106375603	uncharacterized LOC106375603	2.63783	9.2917e-12
LOC106387277	beta-catenin-like protein 1	-1.32071	9.46115e-12
LOC106356117	uncharacterized LOC106356117	2.55683	9.62605e-12
LOC106405144	methyl-CpG-binding domain-containing protein 11-like	14.3381	9.67625e-12
LOC106357597	uncharacterized LOC106357597	1.18905	9.70872e-12
LOC106389804	U-box domain-containing protein 5	2.02264	9.76957e-12
LOC106366465	uncharacterized protein At3g28850	1.82876	9.95893e-12
LOC106390818	uncharacterized LOC106390818	-2.66951	1.01816e-11
LOC106376991	uncharacterized LOC106376991	1.19371	1.03173e-11
LOC106347169	uncharacterized LOC106347169	3.27313	1.04246e-11
LOC106371066	uncharacterized LOC106371066	-2.31515	1.12466e-11
LOC106390699	syntaxin-122-like	3.55753	1.15e-11
LOC106359921	GDP-mannose 4	1.37491	1.16027e-11
LOC106451485	NAC transcription factor 29-like	1.53557	1.23833e-11
LOC106437682	pectin acetylesterase 11-like	1.26057	1.30056e-11
LOC106382178	alpha-glucan phosphorylase 1-like	1.08846	1.32583e-11
LOC106454427	probable WRKY transcription factor 46	4.03409	1.36458e-11
LOC106450535	dehydrogenase/reductase SDR family member 7-like	1.49734	1.37229e-11
LOC106398083	uncharacterized LOC106398083	-2.26727	1.38245e-11
LOC106348123	inositol polyphosphate multikinase alpha	1.36803	1.39284e-11
LOC106372449	protein ASPARTIC PROTEASE IN GUARD CELL 2-like	1.85862	1.40532e-11
LOC106349190	uncharacterized LOC106349190	1.9537	1.42835e-11
LOC106406597	ATP synthase subunit epsilon	-15.0204	1.43043e-11
LOC106348209	uncharacterized LOC106348209	1.28081	1.43346e-11
LOC106418536	uncharacterized LOC106418536	1.57082	1.49718e-11
LOC106443375	uncharacterized LOC106443375	3.44406	1.5297e-11
LOC106371169	ethylene-responsive transcription factor ERF043-like	2.34421	1.53121e-11
LOC106380655	elicitor-responsive protein 3-like	2.31354	1.62757e-11
LOC106401239	probable mediator of RNA polymerase II transcription subunit 37c	2.01167	1.65932e-11
LOC106364156	homeobox-leucine zipper protein ATHB-53-like	3.33159	1.66985e-11
LOC106388433	probable xyloglucan glycosyltransferase 12	1.70853	1.69899e-11
LOC106402428	uncharacterized LOC106402428	1.19038	1.70674e-11
LOC106416642	putative E3 ubiquitin-protein ligase XBAT34	2.77131	1.75834e-11
LOC106441886	PRA1 family protein B4-like	2.06379	1.76926e-11
LOC106392934	L-type lectin-domain containing receptor kinase IV.1	1.20483	1.80062e-11
LOC106406919	uncharacterized LOC106406919	1.56501	1.83387e-11
LOC106452100	pto-interacting protein 1-like	1.43951	1.85378e-11
LOC106354308	putative receptor-like protein kinase At4g00960	2.26173	1.87126e-11
LOC106348469	PRA1 family protein F2	1.37249	1.92443e-11
LOC106357992	dnaJ homolog subfamily B member 1-like	1.09462	1.9301e-11
LOC106349207	pentatricopeptide repeat-containing protein At3g02330-like	12.1013	1.97174e-11
LOC106454632	BON1-associated protein 2-like	12.9665	1.97283e-11
LOC106431253	putative F-box protein At3g23420	4.69661	2.0052e-11
LOC106369351	F-box protein PP2-B1-like	2.29116	2.01488e-11
LOC106381935	protein YLS9-like	1.65543	2.02802e-11
LOC106350467	SRSF protein kinase 1	1.21432	2.05091e-11
LOC106375397	WRKY transcription factor 18-like	3.29068	2.07303e-11
LOC106402123	serine/threonine-protein phosphatase PP1 isozyme 9-like	2.10006	2.07757e-11
LOC106367717	GDP-mannose 4	1.34756	2.13459e-11
LOC106371174	uncharacterized LOC106371174	-14.063	2.15108e-11
LOC106348067	protein EXORDIUM-like 2	1.15992	2.16643e-11
LOC106369026	polyubiquitin	2.19097	2.18771e-11
LOC106372576	E3 ubiquitin-protein ligase PRT6-like	1.45864	2.26046e-11
LOC106361087	vacuolar protein sorting-associated protein 45 homolog	2.18626	2.29025e-11
LOC106354618	glutathione S-transferase TCHQD	1.09662	2.29435e-11
LOC106443064	uncharacterized LOC106443064	-15.5349	2.30474e-11
LOC106454430	arabinogalactan peptide 16-like	1.10151	2.3403e-11
LOC106441288	uncharacterized LOC106441288	13.894	2.43914e-11
LOC106441042	probable xyloglucan endotransglucosylase/hydrolase protein 18	2.90557	2.45927e-11
LOC106382953	protein SAR DEFICIENT 1-like	3.03678	2.55471e-11
LOC106396167	putative F-box protein PP2-B2	2.88341	2.5627e-11
LOC106367635	50S ribosomal protein HLP	13.9859	2.56702e-11
LOC106349104	alpha/beta hydrolase domain-containing protein 17B-like	1.70809	2.61484e-11
LOC106397498	ankyrin repeat-containing protein At5g02620-like	1.19955	2.68427e-11
LOC106364488	uncharacterized LOC106364488	13.1486	2.80071e-11
LOC106446051	uncharacterized LOC106446051	-1.75291	2.80169e-11
LOC106451235	ethylene-responsive transcription factor RAP2-13-like	1.54688	2.83407e-11
LOC106411892	uncharacterized LOC106411892	1.69197	2.87114e-11
LOC106366802	beta-catenin-like protein 1	9.06785	2.87602e-11
LOC106366257	calmodulin-binding transcription activator 2-like	1.08614	2.92877e-11
LOC106383367	golgin subfamily B member 1-like	1.39454	2.97775e-11
LOC106401251	BOI-related E3 ubiquitin-protein ligase 1-like	1.25554	3.058e-11
LOC106401001	pentatricopeptide repeat-containing protein At3g06430	-1.12596	3.25894e-11
LOC106450505	uncharacterized LOC106450505	1.6806	3.32292e-11
LOC106453212	probable tyrosine-protein phosphatase At1g05000	6.76032	3.35912e-11
LOC106380529	transcription factor TCP21-like	1.67111	3.36849e-11
LOC106354187	uncharacterized membrane protein At4g09580-like	1.9045	3.38423e-11
LOC106366314	uncharacterized LOC106366314	1.46178	3.38498e-11
LOC106367938	zinc finger A20 and AN1 domain-containing stress-associated protein 6-like	1.83932	3.50613e-11
LOC106390050	protein YIPF6 homolog	1.57872	3.55254e-11
LOC106450724	universal stress protein A-like protein	3.13783	3.58837e-11
LOC106438834	myb-related protein 3R-1-like	-2.56604	3.59696e-11
LOC106399811	probable calcium-binding protein CML45	4.88434	3.60208e-11
LOC106446865	uncharacterized LOC106446865	1.30443	3.69853e-11
LOC106409310	uncharacterized LOC106409310	5.79937	3.72878e-11
LOC106415461	scarecrow-like protein 30	1.9525	3.8155e-11
LOC106396386	xyloglucan glycosyltransferase 4-like	1.76978	3.9396e-11
LOC106412688	ABC transporter G family member 33-like	-12.6539	3.99332e-11
LOC106418644	GDSL esterase/lipase 3-like	1.29408	3.99736e-11
LOC106438510	F-box only protein 13-like	1.60106	4.05343e-11
LOC106353831	protein argonaute 7-like	1.42435	4.24649e-11
LOC106345559	uncharacterized LOC106345559	-14.2986	4.25271e-11
LOC106439820	NAC transcription factor 29-like	2.54431	4.26618e-11
LOC106451283	protein disulfide-isomerase 2-3	-2.22853	4.28492e-11
LOC106372159	UDP-glucose 6-dehydrogenase 3-like	2.002	4.33275e-11
LOC106441212	eukaryotic translation initiation factor 3 subunit J-like	1.57979	4.35902e-11
LOC106371173	uncharacterized LOC106371173	-14.233	4.51736e-11
LOC106347228	probable galacturonosyltransferase-like 9	1.93557	4.57931e-11
LOC106402858	developmentally-regulated G-protein 2	1.54881	4.66529e-11
LOC106401628	uncharacterized LOC106401628	1.01397	5.01401e-11
LOC106443643	cyclin-U2-1-like	2.75523	5.11488e-11
LOC106451233	ethylene-responsive transcription factor RAP2-13-like	1.59628	5.25613e-11
LOC106380846	dehydration-responsive element-binding protein 2A-like	13.5051	5.37778e-11
LOC106451602	probable LRR receptor-like serine/threonine-protein kinase At1g53430	1.25886	5.39701e-11
LOC106447559	zinc finger AN1 and C2H2 domain-containing stress-associated protein 11-like	2.03627	5.68565e-11
LOC106346105	uncharacterized LOC106346105	-8.12288	5.69615e-11
LOC106381261	uncharacterized LOC106381261	1.96943	5.91276e-11
LOC106399923	uncharacterized LOC106399923	-4.36468	5.91533e-11
LOC106359784	uncharacterized LOC106359784	-13.4639	5.96406e-11
LOC106361825	uncharacterized LOC106361825	2.72411	5.99233e-11
LOC106387749	zinc finger protein VAR3	1.68229	6.03532e-11
LOC106381496	pre-mRNA-splicing factor CWC22 homolog	1.01175	6.13843e-11
LOC106348754	ferrochelatase-1	2.36008	6.15349e-11
LOC106366232	calmodulin-binding transcription activator 2-like	1.1992	6.17526e-11
LOC106443593	uncharacterized LOC106443593	-14.9563	6.28479e-11
LOC106390066	uncharacterized LOC106390066	2.22713	6.43159e-11
LOC106452359	uncharacterized LOC106452359	13.5522	6.56855e-11
LOC106414370	uncharacterized LOC106414370	14.5377	6.57791e-11
LOC106388837	uncharacterized LOC106388837	1.48684	6.61954e-11
LOC106407076	probable WRKY transcription factor 33	3.93629	6.645e-11
LOC106387217	putative glycosyltransferase 5	1.51032	6.65496e-11
LOC106396281	xyloglucan glycosyltransferase 4-like	1.57112	6.69856e-11
LOC106411378	uncharacterized LOC106411378	3.65319	6.7817e-11
LOC106397193	uncharacterized LOC106397193	2.06895	6.81896e-11
LOC106380481	probable transcription factor PosF21	1.3382	6.93237e-11
LOC106382012	acyl-CoA-binding protein-like	-1.11752	6.98147e-11
LOC106406380	nuclear pore complex protein NUP50A-like	1.16931	6.9846e-11
LOC106353462	ethylene-responsive transcription factor RAP2-4-like	1.73375	7.14412e-11
LOC106387185	uncharacterized LOC106387185	1.34399	7.23277e-11
LOC106413597	uncharacterized LOC106413597	1.76857	7.42677e-11
LOC106375020	uncharacterized LOC106375020	2.71528	7.46722e-11
LOC106438387	heat stress transcription factor A-2-like	2.96584	7.50046e-11
LOC106440089	ethylene-overproduction protein 1-like	1.34227	7.64263e-11
LOC106389588	peptidyl-prolyl cis-trans isomerase FKBP10-like	-1.28143	7.75657e-11
LOC106427131	uncharacterized LOC106427131	1.51041	7.8273e-11
LOC106371692	uncharacterized LOC106371692	1.50603	7.93099e-11
LOC106375482	peroxidase A2-like	2.0883	7.99336e-11
LOC106374570	F-box protein VBF-like	4.52167	8.24929e-11
LOC106369158	protein kinase 2A	3.69832	8.27335e-11
LOC106385117	auxin-responsive protein SAUR21-like	-2.29997	8.41859e-11
LOC106349004	probable E3 ubiquitin-protein ligase DTX3	2.1505	8.67064e-11
LOC106402470	putative glucose-6-phosphate 1-epimerase	2.53854	8.68082e-11
LOC106449388	uncharacterized LOC106449388	2.4054	8.82943e-11
LOC106401907	probable protein phosphatase 2C 12	1.54083	8.95118e-11
LOC106445302	short-chain type dehydrogenase/reductase-like	-14.0259	9.15176e-11
LOC106371831	N-alpha-acetyltransferase daf-31-like	1.70406	9.42971e-11
LOC106446321	uncharacterized LOC106446321	4.00837	9.76975e-11
LOC106388435	oxysterol-binding protein-related protein 1C-like	1.12619	9.80685e-11
LOC106356040	thioredoxin reductase 2-like	-3.62451	9.91675e-11
LOC106345432	uncharacterized LOC106345432	13.5077	1.0015e-10
LOC106438422	glucan endo-1	2.38269	1.00381e-10
LOC106371972	peptidyl-tRNA hydrolase 2	2.22961	1.01101e-10
LOC106399606	uncharacterized LOC106399606	13.4124	1.01865e-10
LOC106346033	receptor-like protein kinase THESEUS 1	1.69895	1.03029e-10
LOC106365756	uncharacterized LOC106365756	1.91189	1.06899e-10
LOC106401266	uncharacterized LOC106401266	-12.766	1.07045e-10
LOC106432962	probable ribose-5-phosphate isomerase 1	1.15065	1.09008e-10
LOC106446989	leucine-rich repeat receptor-like serine/threonine/tyrosine-protein kinase SOBIR1	2.72102	1.10039e-10
LOC106415345	homeobox-leucine zipper protein ATHB-6-like	1.3694	1.13073e-10
LOC106352894	glucan endo-1	1.62197	1.15479e-10
LOC106368843	diacylglycerol kinase 5-like	2.1893	1.22892e-10
LOC106387756	uncharacterized LOC106387756	2.45788	1.32455e-10
LOC106396443	serine acetyltransferase 1	1.40329	1.33126e-10
LOC106353231	calcium-dependent protein kinase 32-like	1.67751	1.34417e-10
LOC106381291	putative phospholipid-transporting ATPase 5	2.05668	1.37005e-10
LOC106419232	uncharacterized LOC106419232	1.79759	1.37409e-10
LOC106381287	mitochondrial import inner membrane translocase subunit TIM23-2-like	1.46806	1.4245e-10
LOC106441732	UPF0496 protein At2g18630-like	2.47069	1.47326e-10
LOC106358419	RING-H2 finger protein ATL16	1.88463	1.48271e-10
LOC106397630	lipid phosphate phosphatase 1-like	2.90329	1.50582e-10
LOC106360753	NAC transcription factor 29-like	3.30757	1.52525e-10
LOC106400535	thioredoxin-like protein CITRX	-3.51483	1.53064e-10
LOC106453009	uncharacterized LOC106453009	-13.9387	1.58138e-10
LOC106387421	GPI-anchored protein LORELEI-like	1.31592	1.59661e-10
LOC106453013	uncharacterized LOC106453013	-14.0161	1.59965e-10
LOC106397609	uncharacterized LOC106397609	13.4701	1.62839e-10
LOC106418132	probable inactive leucine-rich repeat receptor-like protein kinase At3g03770	1.50406	1.63443e-10
LOC106367067	uncharacterized LOC106367067	1.71577	1.65489e-10
LOC106449544	uncharacterized LOC106449544	-14.3431	1.76631e-10
LOC106392161	alcohol dehydrogenase class-P-like	-3.15707	1.82221e-10
LOC106356213	zinc finger protein ZAT12-like	7.22342	1.82567e-10
LOC106366801	aspartic proteinase-like protein 2	12.6626	1.85681e-10
LOC106388372	uncharacterized LOC106388372	2.76925	1.87479e-10
LOC106351463	auxin-responsive protein SAUR36-like	-2.56035	1.96562e-10
LOC106453773	uncharacterized LOC106453773	12.6566	1.99341e-10
LOC106346926	uncharacterized LOC106346926	2.35294	2.01922e-10
LOC106435437	uncharacterized LOC106435437	3.0045	2.04462e-10
LOC106410903	probable WRKY transcription factor 33	3.9717	2.09743e-10
LOC106359860	MLP-like protein 328	-5.87435	2.09944e-10
LOC106451656	protein LHCP TRANSLOCATION DEFECT-like	-2.5025	2.14002e-10
LOC106396552	uncharacterized protein At1g04910-like	1.51346	2.15442e-10
LOC106370738	uncharacterized LOC106370738	13.4567	2.205e-10
LOC106372648	heat stress transcription factor A-3-like	2.23125	2.2202e-10
LOC106388122	probable LRR receptor-like serine/threonine-protein kinase RKF3	1.35495	2.27373e-10
LOC106348450	oligouridylate-binding protein 1A-like	1.15923	2.29131e-10
LOC106379043	phosphate transporter PHO1 homolog 5-like	2.5295	2.34836e-10
LOC106396427	chloride channel protein CLC-f-like	1.16322	2.38094e-10
LOC106382145	WAT1-related protein At3g28050-like	1.54434	2.39369e-10
LOC106454839	4-substituted benzoates-glutamate ligase GH3.12	-3.43839	2.41053e-10
LOC106403668	receptor-like protein kinase HSL1	1.95989	2.4216e-10
LOC106382855	signal peptide peptidase-like	1.49113	2.52397e-10
LOC106449097	uncharacterized LOC106449097	3.23449	2.6469e-10
LOC106391253	GATA transcription factor 8	1.51876	2.66907e-10
LOC106388438	glycine-rich selenoprotein-like	1.51878	2.68344e-10
LOC106407476	uncharacterized LOC106407476	1.54592	2.78924e-10
LOC106407633	uncharacterized LOC106407633	3.09902	2.94276e-10
LOC106389571	putative pre-mRNA-splicing factor ATP-dependent RNA helicase PRP1	-1.34661	2.96174e-10
LOC106452111	uncharacterized LOC106452111	-14.3956	3.04613e-10
LOC106409324	serine/threonine-protein kinase HT1-like	1.39386	3.05049e-10
LOC106453648	disease resistance protein LAZ5-like	12.2494	3.11876e-10
LOC106440609	uncharacterized LOC106440609	-1.15793	3.20094e-10
LOC106360685	probable purine permease 18	3.25942	3.3006e-10
LOC106379674	uncharacterized LOC106379674	13.7846	3.35461e-10
LOC106346151	probable serine/threonine-protein kinase Cx32	3.16811	3.46901e-10
LOC106387179	outer membrane lipoprotein Blc-like	1.2361	3.46983e-10
LOC106439036	putative E3 ubiquitin-protein ligase XBAT34	3.80475	3.46989e-10
LOC106412209	probable receptor-like protein kinase At1g11050	2.13508	3.50421e-10
LOC106451288	probable serine/threonine-protein kinase DDB_G0276461	-2.00387	3.50889e-10
LOC106385973	symplekin-like	-12.8698	3.51855e-10
LOC106451804	CBL-interacting serine/threonine-protein kinase 17-like	1.5085	3.54243e-10
LOC106452361	uncharacterized LOC106452361	3.59894	3.5516e-10
LOC106386826	G-type lectin S-receptor-like serine/threonine-protein kinase At1g67520	3.05238	3.59584e-10
LOC106375634	F-box/kelch-repeat protein At1g67480-like	1.60972	3.84906e-10
LOC106406863	uncharacterized LOC106406863	-2.65452	3.87494e-10
LOC106390526	putative glycerol-3-phosphate transporter 1	2.29002	3.98965e-10
LOC106377008	translation initiation factor IF-2-like	1.96974	4.08297e-10
LOC106381757	uncharacterized LOC106381757	-12.7269	4.1004e-10
LOC106348482	NAC domain-containing protein 62-like	1.63652	4.2122e-10
LOC106405887	scarecrow-like protein 5	1.08643	4.27689e-10
LOC106446791	uncharacterized LOC106446791	2.33907	4.38955e-10
LOC106366639	auxin-responsive protein IAA4	1.09594	4.3967e-10
LOC106347544	probable inactive L-type lectin-domain containing receptor kinase III.1	14.3789	4.42011e-10
LOC106360591	uncharacterized LOC106360591	2.0371	4.58795e-10
LOC106405673	reticulon-like protein B22	1.11293	4.65519e-10
LOC106391959	DNA-directed RNA polymerases II and IV subunit 5A	-2.58409	4.6984e-10
LOC106411948	protein YLS7	1.11839	4.71224e-10
LOC106447492	uncharacterized LOC106447492	1.27684	4.80833e-10
LOC106367594	metalloendoproteinase 3-MMP	2.73034	4.91346e-10
LOC106363498	zinc finger A20 and AN1 domain-containing stress-associated protein 6-like	1.83312	4.93423e-10
LOC106390952	uncharacterized protein DDB_G0271670-like	2.43863	4.9915e-10
LOC106345362	BON1-associated protein 2-like	7.82329	5.00372e-10
LOC106359624	uncharacterized LOC106359624	-14.1484	5.09244e-10
LOC106346004	protein translation factor SUI1 homolog	1.27717	5.13505e-10
LOC106381598	xyloglucan 6-xylosyltransferase 2-like	1.71882	5.14894e-10
LOC106451759	uncharacterized vacuolar membrane protein YML018C-like	-13.1868	5.18101e-10
LOC106360793	uncharacterized LOC106360793	-2.7287	5.2668e-10
LOC106388618	protein YLS9-like	2.69921	5.28106e-10
LOC106381934	uncharacterized zinc finger CCHC domain-containing protein At4g19190-like	1.018	5.3267e-10
LOC106367933	zinc finger A20 and AN1 domain-containing stress-associated protein 6-like	2.01001	5.34005e-10
LOC106353247	GATA transcription factor 4-like	1.12159	5.45005e-10
LOC106430499	uncharacterized LOC106430499	14.6167	5.50962e-10
LOC106400075	ethylene-responsive transcription factor RAP2-4-like	1.01149	5.70716e-10
LOC106371512	cytochrome P450 81F1-like	12.9268	5.81293e-10
LOC106371432	B3 domain-containing protein REM3-like	1.43528	5.87041e-10
LOC106445366	putative 1-phosphatidylinositol-3-phosphate 5-kinase FAB1D	1.4285	5.87847e-10
LOC106452988	probable serine/threonine-protein kinase drkD	1.03448	5.92878e-10
LOC106389699	desumoylating isopeptidase 1-like	1.99591	5.99587e-10
LOC106372156	probable galacturonosyltransferase 14	1.36042	6.13497e-10
LOC106359194	myosin heavy chain kinase B-like	2.18718	6.25542e-10
LOC106451899	protein CYPRO4	1.01595	6.28382e-10
LOC106451410	probable WRKY transcription factor 21	-1.56513	6.30651e-10
LOC106345954	disease resistance protein TAO1-like	1.38952	6.77224e-10
LOC106381640	serine/threonine-protein kinase At5g01020-like	1.62896	6.81168e-10
LOC106372417	6-hydroxynicotinate 3-monooxygenase-like	1.58695	7.00519e-10
LOC106352917	probable WRKY transcription factor 70	1.90993	7.1163e-10
LOC106359092	disease resistance protein TAO1-like	4.44222	7.19756e-10
LOC106352282	probable tRNA (guanine(26)-N(2))-dimethyltransferase 2	-1.99701	7.22397e-10
LOC106447109	hexokinase-1-like	1.14654	7.2947e-10
LOC106397809	uncharacterized LOC106397809	-2.92576	7.60164e-10
LOC106401707	uncharacterized LOC106401707	-1.59883	8.13864e-10
LOC106427158	uncharacterized LOC106427158	-2.809	8.32228e-10
LOC106369016	uncharacterized LOC106369016	1.5669	8.49183e-10
LOC106452911	uncharacterized LOC106452911	1.30099	8.81931e-10
LOC106360752	NAC transcription factor 29-like	3.20964	8.93603e-10
LOC106437727	40S ribosomal protein S3-2-like	-1.02169	9.0304e-10
LOC106347232	formin-like protein 8	3.10902	9.0892e-10
LOC106389271	uncharacterized LOC106389271	12.087	9.16093e-10
LOC106411206	uncharacterized LOC106411206	-13.844	9.18765e-10
LOC106387288	uncharacterized LOC106387288	-1.18344	9.52546e-10
LOC106451369	uncharacterized LOC106451369	1.26228	9.83998e-10
LOC106409444	uncharacterized LOC106409444	4.76147	9.85598e-10
LOC106362075	uncharacterized LOC106362075	2.56385	9.99845e-10
LOC106379367	uncharacterized LOC106379367	-3.39647	1.02627e-09
LOC106390670	DNA ligase 1-like	2.20981	1.04479e-09
LOC106346082	zinc finger CCCH domain-containing protein 34-like	1.1273	1.04771e-09
LOC106385306	auxin-responsive protein SAUR21-like	-2.50038	1.05456e-09
LOC106379190	uncharacterized LOC106379190	-14.7305	1.05536e-09
LOC106450289	aquaporin NIP2-1	-14.3916	1.06268e-09
LOC106449323	soluble inorganic pyrophosphatase 4-like	1.79255	1.10085e-09
LOC106364650	uncharacterized LOC106364650	12.7886	1.11098e-09
LOC106351856	uncharacterized LOC106351856	3.60387	1.11431e-09
LOC106450853	protein BPS1	2.66815	1.11671e-09
LOC106451042	xylosyltransferase 1-like	1.22585	1.12236e-09
LOC106362059	uncharacterized LOC106362059	1.06498	1.14542e-09
LOC106372154	cyclic nucleotide-gated ion channel 2-like	1.21231	1.16102e-09
LOC106371943	peptidyl-tRNA hydrolase 2	5.00172	1.18279e-09
LOC106354496	BEL1-like homeodomain protein 3	1.04402	1.19467e-09
LOC106402358	E3 ubiquitin-protein ligase RING1-like	1.54083	1.19506e-09
LOC106453022	DNA ligase 1-like	-12.392	1.21488e-09
LOC106454087	uncharacterized LOC106454087	11.7932	1.21714e-09
LOC106391088	glycerophosphodiester phosphodiesterase protein kinase domain-containing GDPDL2-like	1.76253	1.25802e-09
LOC106368836	uncharacterized LOC106368836	1.28955	1.28354e-09
LOC106366295	probable disease resistance protein At5g66900	2.89406	1.30477e-09
LOC106443219	17.4 kDa class III heat shock protein-like	2.67938	1.30899e-09
LOC106347748	two-component response regulator-like APRR2	2.16041	1.3102e-09
LOC106391632	calmodulin-binding protein 25-like	1.68252	1.33269e-09
LOC106446990	leucine-rich repeat receptor-like serine/threonine/tyrosine-protein kinase SOBIR1	2.57066	1.33836e-09
LOC106437922	receptor-like protein kinase FERONIA	1.10316	1.34835e-09
LOC106349121	probable eukaryotic translation initiation factor 5-2	-2.77783	1.41512e-09
LOC106397488	uncharacterized LOC106397488	12.5674	1.42502e-09
LOC106385013	calponin homology domain-containing protein DDB_G0272472-like	2.05327	1.42854e-09
LOC106406374	putative glycosyltransferase 5	1.36384	1.45447e-09
LOC106348442	GDSL esterase/lipase At1g54020-like	2.03248	1.45473e-09
LOC106357057	uncharacterized LOC106357057	3.24958	1.46109e-09
LOC106401395	transcription factor AIG1-like	1.01179	1.47359e-09
LOC106369015	uncharacterized LOC106369015	1.94693	1.48424e-09
LOC106451671	uncharacterized LOC106451671	1.47012	1.54121e-09
LOC106407092	probable mitochondrial chaperone BCS1-B	2.93176	1.56457e-09
LOC106372374	calcium-dependent protein kinase 7-like	1.08325	1.58369e-09
LOC106403132	elongation of fatty acids protein 3-like	3.61173	1.60724e-09
LOC106384521	aspartic proteinase-like protein 2	1.08261	1.61524e-09
LOC106382148	WAT1-related protein At3g28100-like	1.41163	1.61753e-09
LOC106438033	cytochrome P450 81D1-like	1.22457	1.6314e-09
LOC106351544	probable mediator of RNA polymerase II transcription subunit 37c	2.62886	1.67879e-09
LOC106451470	ABC transporter G family member 24-like	1.99598	1.70219e-09
LOC106405930	myosin-binding protein 2	1.09105	1.70539e-09
LOC106423373	RING-H2 finger protein ATL80-like	2.56431	1.71446e-09
LOC106348746	glyoxysomal fatty acid beta-oxidation multifunctional protein MFP-a-like	1.72133	1.7187e-09
LOC106445922	calcium-dependent protein kinase 32-like	1.6623	1.73113e-09
LOC106367664	uncharacterized LOC106367664	1.30059	1.7828e-09
LOC106453042	microtubule-binding protein TANGLED	-3.32931	1.81098e-09
LOC106394984	putative 1-phosphatidylinositol-3-phosphate 5-kinase FAB1C	1.02285	1.85528e-09
LOC106453121	F-box protein At1g61340-like	2.97101	1.85577e-09
LOC106363703	homeobox-leucine zipper protein ATHB-6-like	1.17614	1.91883e-09
LOC106349206	UDP-arabinopyranose mutase 1-like	1.3298	1.92435e-09
LOC106348138	RING-H2 finger protein ATL45	1.79996	1.92537e-09
LOC106446571	tyrosine-protein kinase STK-like	1.97558	1.93447e-09
LOC106453039	protein YIPF1 homolog	-1.90409	1.9537e-09
LOC106375442	uncharacterized LOC106375442	1.29401	1.96755e-09
LOC106447116	profilin-1-like	-1.90749	1.9948e-09
LOC106380749	uncharacterized LOC106380749	1.17778	2.0416e-09
LOC106402898	uncharacterized LOC106402898	1.71632	2.05409e-09
LOC106386568	disease resistance protein TAO1-like	-11.4704	2.08102e-09
LOC106438578	U1 small nuclear ribonucleoprotein C-like	2.54306	2.11043e-09
LOC106386574	anamorsin homolog	1.1858	2.18143e-09
LOC106382829	transcription factor SAC51-like	1.29858	2.20242e-09
LOC106364396	uncharacterized LOC106364396	-14.9852	2.23229e-09
LOC106388151	putative ATP-dependent RNA helicase DHX33	3.10852	2.25339e-09
LOC106353949	transcription factor MYB1R1-like	2.62011	2.31909e-09
LOC106385470	uncharacterized LOC106385470	-15.3807	2.32916e-09
LOC106354352	uncharacterized LOC106354352	12.9378	2.3454e-09
LOC106438934	S-adenosylmethionine decarboxylase proenzyme 3	1.10734	2.3748e-09
LOC106401189	1-aminocyclopropane-1-carboxylate oxidase 4	1.37029	2.44419e-09
LOC106366337	calcium-dependent protein kinase 28-like	2.29727	2.45262e-09
LOC106440739	uncharacterized LOC106440739	2.63594	2.46458e-09
LOC106347396	uncharacterized protein At3g49720-like	1.42065	2.47671e-09
LOC106453449	pre-mRNA-splicing factor SLU7-like	2.04816	2.4959e-09
LOC106349111	COBRA-like protein 2	1.99661	2.49834e-09
LOC106349635	F-box protein DOR-like	3.89	2.51069e-09
LOC106358335	uncharacterized LOC106358335	1.65897	2.66614e-09
LOC106396204	MATE efflux family protein 5-like	-3.36793	2.67562e-09
LOC106360686	probable mediator of RNA polymerase II transcription subunit 37e	1.61477	2.73385e-09
LOC106410748	UDP-glucuronate 4-epimerase 1	1.28161	2.76567e-09
LOC106386049	auxin-responsive protein SAUR64-like	-2.62882	2.83736e-09
LOC106452983	serine/threonine-protein phosphatase 4 regulatory subunit 3-like	1.03807	2.9357e-09
LOC106451693	probable carboxylesterase 5	1.65564	2.96096e-09
LOC106451643	mitogen-activated protein kinase kinase 4-like	2.5481	2.98145e-09
LOC106362019	serine/threonine-protein phosphatase PP1 isozyme 9-like	2.18695	3.02057e-09
LOC106443714	uncharacterized LOC106443714	2.71596	3.04849e-09
LOC106454550	uncharacterized LOC106454550	5.30914	3.17752e-09
LOC106452478	probable small nuclear ribonucleoprotein G	1.60628	3.19453e-09
LOC106448294	uncharacterized LOC106448294	1.86255	3.21437e-09
LOC106357743	serine/threonine-protein kinase At5g01020-like	1.45395	3.32058e-09
LOC106356004	pathogenesis-related protein 5-like	-13.9854	3.32627e-09
LOC106380576	cysteine-rich and transmembrane domain-containing protein A-like	2.60716	3.39439e-09
LOC106347315	protein translation factor SUI1 homolog	1.02422	3.47279e-09
LOC106370986	protein SULFUR DEFICIENCY-INDUCED 2	1.29964	3.47745e-09
LOC106349636	diphthine--ammonia ligase	1.13122	3.54467e-09
LOC106348844	uncharacterized LOC106348844	1.06473	3.62478e-09
LOC106399516	F-box protein At1g22220-like	2.66832	3.63251e-09
LOC106372577	myb-related protein 3R-1-like	2.07255	3.64572e-09
LOC106394825	probable mitochondrial chaperone BCS1-B	2.66638	3.72423e-09
LOC106353296	protein ASPARTIC PROTEASE IN GUARD CELL 1-like	-1.35504	3.75268e-09
LOC106365976	chaperone protein dnaJ 10-like	3.31508	3.76227e-09
LOC106357566	xyloglucan galactosyltransferase KATAMARI1-like	1.70053	3.90915e-09
LOC106452997	beta-glucosidase-like SFR2	1.26322	3.96011e-09
LOC106382071	probable inactive purple acid phosphatase 9	1.59145	3.9845e-09
LOC106362542	uncharacterized LOC106362542	-5.89721	4.01359e-09
LOC106452352	protein Iojap	2.00188	4.2025e-09
LOC106374404	uncharacterized LOC106374404	1.2784	4.20813e-09
LOC106415772	non-lysosomal glucosylceramidase-like	1.61858	4.20835e-09
LOC106451760	desumoylating isopeptidase 1-like	-9.46903	4.21606e-09
LOC106445409	diacylglycerol kinase 5-like	2.16933	4.22058e-09
LOC106350850	uncharacterized LOC106350850	4.02777	4.2434e-09
LOC106349368	syntaxin-121-like	1.78563	4.25902e-09
LOC106381135	sufE-like protein 2	1.20153	4.38474e-09
LOC106407288	chaperone protein dnaJ 10-like	3.23698	4.3853e-09
LOC106451531	17.6 kDa class I heat shock protein 2-like	2.31553	4.62595e-09
LOC106386565	disease resistance protein TAO1-like	-11.2051	4.66637e-09
LOC106368211	40S ribosomal protein S9-1-like	1.18429	4.67552e-09
LOC106381411	probable serine/threonine-protein kinase NAK	2.39697	4.7596e-09
LOC106366817	LOB domain-containing protein 41-like	2.48826	4.76561e-09
LOC106351773	uncharacterized LOC106351773	-12.7889	4.80977e-09
LOC106421443	F-box protein At1g61340-like	2.89871	4.94485e-09
LOC106450086	uncharacterized LOC106450086	1.96965	4.99218e-09
LOC106409056	wound-induced basic protein-like	-1.54852	5.01648e-09
LOC106354022	ACD11 homolog protein-like	5.90577	5.03141e-09
LOC106364421	ultraviolet-B receptor UVR8-like	6.93619	5.14132e-09
LOC106440290	transcription factor bHLH3-like	2.58376	5.36181e-09
LOC106452296	uncharacterized LOC106452296	1.17698	5.39677e-09
LOC106447135	uncharacterized LOC106447135	1.33584	5.43959e-09
LOC106346410	probable sugar phosphate/phosphate translocator At1g48230	1.64311	5.50195e-09
LOC106368765	uncharacterized LOC106368765	6.01478	5.54854e-09
LOC106380661	D-3-phosphoglycerate dehydrogenase 1	-1.10165	5.65966e-09
LOC106388944	AT-hook motif nuclear-localized protein 15	1.44459	5.73234e-09
LOC106361067	elicitor-responsive protein 3-like	2.27022	5.79913e-09
LOC106421151	G-type lectin S-receptor-like serine/threonine-protein kinase At1g61370	1.85948	5.87232e-09
LOC106381853	mitogen-activated protein kinase 19-like	1.25957	5.90182e-09
LOC106440531	protein SGT1 homolog A	2.05551	5.98439e-09
LOC106358280	uncharacterized LOC106358280	13.9064	5.98946e-09
LOC106386690	uncharacterized LOC106386690	2.25378	6.03464e-09
LOC106365662	histone deacetylase 19-like	-7.42425	6.04749e-09
LOC106439268	uncharacterized LOC106439268	1.54221	6.05564e-09
LOC106360706	scarecrow-like protein 13	2.98634	6.11937e-09
LOC106405588	uncharacterized LOC106405588	1.16815	6.18083e-09
LOC106368001	HAUS augmin-like complex subunit 3	-1.44171	6.29982e-09
LOC106410993	uncharacterized LOC106410993	2.70401	6.42859e-09
LOC106389302	transmembrane protein 53-like	2.8384	6.46037e-09
LOC106454892	uncharacterized LOC106454892	12.7171	6.55962e-09
LOC106437396	uncharacterized LOC106437396	-2.63341	6.69771e-09
LOC106381558	cinnamoyl-CoA reductase 2-like	3.22401	6.83619e-09
LOC106410545	uncharacterized LOC106410545	2.08484	6.94272e-09
LOC106403064	probable LRR receptor-like serine/threonine-protein kinase At1g63430	1.56649	7.00274e-09
LOC106365213	uncharacterized LOC106365213	-12.6538	7.01937e-09
LOC106371348	tubby-like F-box protein 1	1.02771	7.02705e-09
LOC106370424	ethylene-responsive transcription factor ERF016-like	4.22029	7.04136e-09
LOC106355063	thioredoxin reductase 2-like	-3.78555	7.04761e-09
LOC106385946	zinc-finger homeodomain protein 8-like	-1.90889	7.36256e-09
LOC106374270	putative protein TPRXL	2.533	7.52261e-09
LOC106445304	disease resistance protein TAO1-like	-1.83762	7.86554e-09
LOC106366281	protein DA1-related 3-like	11.8698	8.02255e-09
LOC106439074	myosin heavy chain kinase B-like	2.75988	8.03001e-09
LOC106439139	uncharacterized LOC106439139	-1.6098	8.03494e-09
LOC106388046	uncharacterized LOC106388046	1.02119	8.04448e-09
LOC106443278	uncharacterized LOC106443278	-2.74243	8.09729e-09
LOC106451547	phosphoinositide phospholipase C 8-like	-2.69747	8.11883e-09
LOC106397390	long chain acyl-CoA synthetase 6	-12.4366	8.22218e-09
LOC106415640	probable mitochondrial chaperone BCS1-B	2.56151	8.22427e-09
LOC106352780	calmodulin-5	1.69695	8.2792e-09
LOC106409074	uncharacterized LOC106409074	13.2023	8.33427e-09
LOC106381394	dehydrin ERD14-like	1.57787	8.34093e-09
LOC106346142	probable inactive serine/threonine-protein kinase fnkC	1.11567	8.55627e-09
LOC106398038	gibberellin 2-beta-dioxygenase 6-like	2.6655	8.57706e-09
LOC106430018	uncharacterized LOC106430018	2.13553	8.63951e-09
LOC106385936	ethylene-responsive transcription factor ERF013-like	4.7335	8.67474e-09
LOC106411030	uncharacterized LOC106411030	1.39443	8.86706e-09
LOC106381891	lysine-specific demethylase JMJ706-like	1.40657	8.90421e-09
LOC106349443	lipid phosphate phosphatase 1	2.24284	8.93376e-09
LOC106383346	protein crooked neck-like	1.57428	8.93721e-09
LOC106350863	chlorophyllide a oxygenase	1.02792	9.00789e-09
LOC106368349	PTI1-like tyrosine-protein kinase 3	1.66338	9.08623e-09
LOC106406306	bifunctional D-cysteine desulfhydrase/1-aminocyclopropane-1-carboxylate deaminase	1.20827	9.10133e-09
LOC106379059	probable WRKY transcription factor 51	-14.6689	9.26313e-09
LOC106409244	uncharacterized LOC106409244	-14.2445	9.40939e-09
LOC106410625	pre-mRNA-splicing factor ATP-dependent RNA helicase PRP16-like	1.63307	9.50776e-09
LOC106346512	probable xyloglucan endotransglucosylase/hydrolase protein 23	2.65829	9.86457e-09
LOC106402708	uncharacterized LOC106402708	1.54548	1.0015e-08
LOC106397764	uncharacterized LOC106397764	-2.61617	1.00191e-08
LOC106353991	heat stress transcription factor A-8-like	2.41619	1.02545e-08
LOC106395312	RHOMBOID-like protein 4	1.09622	1.0267e-08
LOC106406979	uncharacterized LOC106406979	1.86489	1.05846e-08
LOC106382847	agamous-like MADS-box protein AGL27	1.04487	1.05911e-08
LOC106434540	acyl-protein thioesterase 2-like	-1.88766	1.06505e-08
LOC106376538	geraniol 8-hydroxylase-like	1.32654	1.07383e-08
LOC106368742	probable disease resistance protein At4g33300	2.43162	1.08135e-08
LOC106357417	metacaspase-5-like	2.98743	1.11234e-08
LOC106437618	uncharacterized LOC106437618	1.70299	1.11353e-08
LOC106368204	guanylate kinase 2-like	1.48108	1.11996e-08
LOC106357602	uncharacterized LOC106357602	1.58379	1.12415e-08
LOC106403778	RING finger and CHY zinc finger domain-containing protein 1-like	1.38909	1.13707e-08
LOC106374515	phospholipase A2-beta	1.93761	1.14132e-08
LOC106437538	uncharacterized LOC106437538	3.36921	1.16741e-08
LOC106450452	probable receptor-like protein kinase At2g47060	1.00131	1.17692e-08
LOC106364685	DNA-binding protein DDB_G0278111-like	1.34195	1.18493e-08
LOC106444393	ethylene-responsive transcription factor ERF104-like	2.7443	1.19522e-08
LOC106348962	ras-related protein RABA4c	1.8878	1.21703e-08
LOC106362628	zinc finger BED domain-containing protein DAYSLEEPER-like	-1.27347	1.2487e-08
LOC106452268	uncharacterized LOC106452268	1.74197	1.28677e-08
LOC106438973	glyceraldehyde-3-phosphate dehydrogenase	-3.04837	1.29226e-08
LOC106350679	aminoacylase-1-like	1.37769	1.29275e-08
LOC106369357	ATPase ASNA1 homolog	2.08957	1.29897e-08
LOC106452385	cysteine proteinase inhibitor 6	-2.53564	1.30705e-08
LOC106454754	V-type proton ATPase 16 kDa proteolipid subunit-like	-3.17942	1.31368e-08
LOC106441311	uncharacterized LOC106441311	4.64637	1.32089e-08
LOC106388452	glycine-rich selenoprotein-like	1.36378	1.34618e-08
LOC106390119	uncharacterized LOC106390119	1.0675	1.35647e-08
LOC106401588	uncharacterized LOC106401588	2.77824	1.377e-08
LOC106365738	serpin-ZX	1.35042	1.40948e-08
LOC106445197	uncharacterized LOC106445197	2.50577	1.4455e-08
LOC106406486	beta carbonic anhydrase 4-like	1.69727	1.44607e-08
LOC106382506	insulin-degrading enzyme-like	1.26739	1.45931e-08
LOC106382686	uncharacterized LOC106382686	1.6758	1.46117e-08
LOC106397783	uncharacterized LOC106397783	-2.57345	1.50003e-08
LOC106388416	outer membrane lipoprotein Blc-like	1.08925	1.51193e-08
LOC106453028	phosphoglycerate mutase-like protein AT74	-12.8319	1.52712e-08
LOC106453756	4-coumarate--CoA ligase 1-like	1.56384	1.53279e-08
LOC106421312	uncharacterized LOC106421312	1.41704	1.54282e-08
LOC106446267	disease resistance protein RML1A-like	1.63786	1.55833e-08
LOC106366285	UPF0496 protein At5g66675-like	1.3641	1.5661e-08
LOC106382730	ras GTPase-activating protein-binding protein 2-like	1.33477	1.58269e-08
LOC106392123	serine/threonine-protein kinase At5g01020-like	1.0965	1.58597e-08
LOC106411078	phytosulfokine receptor 1-like	1.31435	1.59251e-08
LOC106382788	RHOMBOID-like protein 4	1.04836	1.60434e-08
LOC106406884	uncharacterized LOC106406884	13.8379	1.67489e-08
LOC106366870	allantoinase	-2.68298	1.76223e-08
LOC106353690	uncharacterized LOC106353690	1.10176	1.78519e-08
LOC106439721	uncharacterized LOC106439721	2.02915	1.79077e-08
LOC106385937	ethylene-responsive transcription factor ERF013-like	4.52729	1.79327e-08
LOC106388381	uncharacterized LOC106388381	2.476	1.80928e-08
LOC106377528	vacuolar cation/proton exchanger 2-like	1.58032	1.81201e-08
LOC106446077	inositol polyphosphate multikinase alpha	1.3112	1.82062e-08
LOC106453038	filament-like plant protein 3	-1.37025	1.84869e-08
LOC106396625	AP2/ERF and B3 domain-containing transcription factor RAV1-like	1.3924	1.90703e-08
LOC106413876	BON1-associated protein 1-like	2.11128	1.92273e-08
LOC106362535	WRKY transcription factor 22-like	1.93712	1.96379e-08
LOC106395504	uncharacterized LOC106395504	1.99744	1.98248e-08
LOC106451999	probable protein phosphatase 2C 49	2.50149	2.03213e-08
LOC106401656	ethylene-responsive transcription factor ERF019-like	2.88482	2.0436e-08
LOC106376661	D-glycerate 3-kinase	1.95062	2.08788e-08
LOC106393512	transcription factor MYB44	2.25649	2.10176e-08
LOC106390659	uridine nucleosidase 1-like	1.29498	2.11635e-08
LOC106346635	UPF0690 protein C1orf52 homolog	-1.71346	2.14088e-08
LOC106452374	uncharacterized LOC106452374	4.48579	2.14409e-08
LOC106357768	cytosolic sulfotransferase 11-like	-2.5266	2.14938e-08
LOC106454682	uncharacterized LOC106454682	2.1443	2.21436e-08
LOC106353812	ABC transporter C family member 4-like	1.30075	2.21887e-08
LOC106362980	uncharacterized LOC106362980	12.7434	2.24481e-08
LOC106404915	uncharacterized LOC106404915	1.38514	2.2519e-08
LOC106421654	F-box protein At2g02240-like	3.50834	2.26143e-08
LOC106406198	ethylene-responsive transcription factor RAP2-4-like	1.16377	2.30314e-08
LOC106449543	uncharacterized LOC106449543	-13.8136	2.3045e-08
LOC106404549	uncharacterized LOC106404549	1.05841	2.32331e-08
LOC106386770	uncharacterized LOC106386770	-2.65721	2.33014e-08
LOC106409889	uncharacterized LOC106409889	14.1909	2.33357e-08
LOC106389840	auxin-responsive protein SAUR72-like	1.33211	2.3475e-08
LOC106353064	syntaxin-121	1.73104	2.34837e-08
LOC106402296	syntaxin-43	-1.33686	2.37648e-08
LOC106449681	serpin-ZX	1.37943	2.39544e-08
LOC106369186	alpha-amylase 1	1.25494	2.42408e-08
LOC106380457	putative UDP-arabinose 4-epimerase 4	2.14016	2.46715e-08
LOC106431372	glutaredoxin-C8-like	6.0933	2.47832e-08
LOC106408958	extensin-like	12.3048	2.48306e-08
LOC106382906	flavonol synthase 3-like	1.33157	2.49615e-08
LOC106348467	beta-fructofuranosidase	2.27133	2.54713e-08
LOC106382885	probable trehalose-phosphate phosphatase J	2.49576	2.56463e-08
LOC106401351	F-box protein SKIP14	1.3803	2.59257e-08
LOC106408069	ankyrin-1-like	-3.42578	2.62427e-08
LOC106376448	scarecrow-like protein 1	1.01396	2.70253e-08
LOC106378415	auxin-responsive protein IAA9-like	-14.2159	2.70851e-08
LOC106451543	peptide chain release factor PrfB1	1.09098	2.741e-08
LOC106375903	uncharacterized LOC106375903	-12.6281	2.76442e-08
LOC106440202	type I inositol polyphosphate 5-phosphatase 2-like	2.55247	2.77041e-08
LOC106404983	uncharacterized LOC106404983	2.55407	2.7783e-08
LOC106375883	uncharacterized LOC106375883	1.03163	2.86827e-08
LOC106442018	sodium/hydrogen exchanger 3-like	1.43581	2.89183e-08
LOC106394732	transcription factor bHLH51-like	-2.03672	2.94399e-08
LOC106374383	auxin-responsive protein SAUR36-like	3.84157	2.96835e-08
LOC106347867	uncharacterized LOC106347867	1.22255	3.01155e-08
LOC106396432	cysteine-rich and transmembrane domain-containing protein A-like	2.56329	3.09527e-08
LOC106450263	phosphoinositide phospholipase C 6-like	11.8062	3.14067e-08
LOC106369014	myb-related protein 306-like	1.31745	3.22235e-08
LOC106366253	uncharacterized LOC106366253	-1.48052	3.23775e-08
LOC106404757	ACD11 homolog protein-like	12.9043	3.24533e-08
LOC106405714	uncharacterized LOC106405714	3.16283	3.26468e-08
LOC106451118	serine/threonine-protein kinase KIPK-like	-1.82572	3.26853e-08
LOC106387189	shikimate O-hydroxycinnamoyltransferase-like	1.29982	3.31161e-08
LOC106362025	hsp70-Hsp90 organizing protein 3-like	1.34643	3.33835e-08
LOC106394854	probable RNA-binding protein ARP1	-2.13184	3.3712e-08
LOC106368495	uncharacterized LOC106368495	1.38146	3.3871e-08
LOC106454834	uncharacterized LOC106454834	4.55052	3.43578e-08
LOC106440738	uncharacterized LOC106440738	2.57787	3.43674e-08
LOC106396486	pyruvate dehydrogenase E1 component subunit alpha-1	-2.39039	3.51594e-08
LOC106347054	NAC transcription factor 29-like	2.76412	3.51609e-08
LOC106435426	protein CYPRO4-like	1.30641	3.52612e-08
LOC106401345	glucan endo-1	1.98526	3.52888e-08
LOC106370646	probable glucuronokinase 2	12.5292	3.52918e-08
LOC106452222	uncharacterized LOC106452222	1.12975	3.67412e-08
LOC106354642	extensin-3-like	3.75394	3.69707e-08
LOC106443550	probable calcium-binding protein CML16	2.43871	3.70202e-08
LOC106437703	xyloglucan galactosyltransferase KATAMARI1 homolog	1.93743	3.72677e-08
LOC106451887	probable pyruvate kinase	1.05167	3.79627e-08
LOC106385926	RNA-directed DNA polymerase homolog	12.5479	3.92427e-08
LOC106453031	DNA excision repair protein ERCC-1	-1.46002	3.94972e-08
LOC106381065	uncharacterized LOC106381065	1.60937	4.0956e-08
LOC106366496	disease resistance protein RML1B-like	3.01082	4.10943e-08
LOC106401876	gibberellin 2-beta-dioxygenase 6-like	2.27563	4.11187e-08
LOC106352581	uncharacterized LOC106352581	-2.7385	4.17663e-08
LOC106396157	putative F-box protein PP2-B2	2.63053	4.22206e-08
LOC106447264	protein YLS9-like	1.00189	4.2295e-08
LOC106391520	protein IQ-DOMAIN 1-like	-1.61447	4.23498e-08
LOC106408934	protein EDS1B-like	1.73109	4.25605e-08
LOC106449634	lysine histidine transporter-like 7	4.21131	4.29034e-08
LOC106399138	uncharacterized LOC106399138	2.5418	4.34934e-08
LOC106439452	uncharacterized LOC106439452	1.16415	4.54019e-08
LOC106391616	probable WRKY transcription factor 54	2.11984	4.58286e-08
LOC106350005	serine/threonine-protein phosphatase 2A 65 kDa regulatory subunit A alpha isoform-like	-2.40179	4.61816e-08
LOC106438469	protein EXORDIUM-like	2.91367	4.67886e-08
LOC106411132	uncharacterized LOC106411132	3.43418	4.70827e-08
LOC106375409	probable WRKY transcription factor 11	1.09389	4.74836e-08
LOC106375328	ethylene-responsive transcription factor ERF043-like	2.20686	4.83477e-08
LOC106350869	probable tRNA (guanine(26)-N(2))-dimethyltransferase 2	12.2919	4.85066e-08
LOC106358384	ABC transporter G family member 24-like	-5.83559	4.94812e-08
LOC106361083	pollen-specific leucine-rich repeat extensin-like protein 4	2.40211	4.97617e-08
LOC106445929	putative receptor-like protein kinase At5g39000	1.89285	5.03586e-08
LOC106438385	heat stress transcription factor A-2-like	3.08353	5.20523e-08
LOC106397233	amino-acid permease BAT1	1.9127	5.34322e-08
LOC106402027	uncharacterized LOC106402027	1.87304	5.34568e-08
LOC106396946	uncharacterized LOC106396946	1.20326	5.34655e-08
LOC106407084	caffeic acid 3-O-methyltransferase-like	2.81692	5.3865e-08
LOC106353113	GATA transcription factor 4-like	1.45651	5.60065e-08
LOC106365837	uncharacterized LOC106365837	1.16625	5.62488e-08
LOC106446435	classical arabinogalactan protein 2-like	2.06376	5.65317e-08
LOC106445910	protein STRICTOSIDINE SYNTHASE-LIKE 9-like	1.44378	5.6675e-08
LOC106393371	uncharacterized LOC106393371	1.5013	5.69703e-08
LOC106405481	uncharacterized LOC106405481	-1.71053	5.76068e-08
LOC106355313	uncharacterized LOC106355313	-13.5486	5.84336e-08
LOC106371822	alpha-N-acetylglucosaminidase-like	11.2388	5.852e-08
LOC106347260	TPR repeat-containing thioredoxin TTL1-like	1.5615	5.86993e-08
LOC106366115	NHP2-like protein 1	-1.40775	5.88718e-08
LOC106433151	very-long-chain enoyl-CoA reductase-like	1.17696	5.89279e-08
LOC106346436	AP2/ERF and B3 domain-containing transcription factor RAV1	1.69425	6.02469e-08
LOC106397068	leucine-rich repeat receptor-like serine/threonine-protein kinase At2g14510	-1.59793	6.12957e-08
LOC106395888	laccase-5-like	3.29204	6.19688e-08
LOC106389879	vacuolar protein sorting-associated protein 2 homolog 2-like	-1.28118	6.22561e-08
LOC106399533	uncharacterized LOC106399533	4.94075	6.25106e-08
LOC106443074	probable trehalose-phosphate phosphatase I	3.17976	6.31256e-08
LOC106348148	probable serine/threonine-protein kinase Cx32	2.00545	6.4073e-08
LOC106395064	receptor-like protein 12	4.24105	6.42442e-08
LOC106398210	nucleobase-ascorbate transporter 6-like	3.36817	6.47825e-08
LOC106402429	probable sugar phosphate/phosphate translocator At1g48230	1.55903	6.48878e-08
LOC106379654	uncharacterized LOC106379654	4.35476	6.53182e-08
LOC106358400	calcium-dependent protein kinase 28-like	2.59915	6.53471e-08
LOC106382615	sterol 3-beta-glucosyltransferase-like	1.20746	6.59621e-08
LOC106451270	uncharacterized LOC106451270	-1.7072	6.59711e-08
LOC106407044	expansin-like A1	1.5631	6.71945e-08
LOC106410607	chaperone protein ClpB1-like	1.80501	6.72226e-08
LOC106364756	uncharacterized LOC106364756	1.45369	6.80967e-08
LOC106416007	putative methyltransferase DDB_G0268948	2.26625	6.95503e-08
LOC106345448	protein LITTLE ZIPPER 3-like	1.6383	7.00091e-08
LOC106452984	serine/threonine-protein phosphatase 4 regulatory subunit 3-like	1.14455	7.04432e-08
LOC106357986	MACPF domain-containing protein CAD1-like	1.45064	7.07245e-08
LOC106370729	uncharacterized LOC106370729	12.1339	7.11e-08
LOC106393092	probable protein phosphatase 2C 15	1.39217	7.23223e-08
LOC106415906	interactor of constitutive active ROPs 1-like	-1.30207	7.2422e-08
LOC106348466	phospholipase D epsilon-like	2.21286	7.25566e-08
LOC106347724	momilactone A synthase	-1.53371	7.31805e-08
LOC106352899	galactokinase-like	-12.6514	7.31949e-08
LOC106379716	uncharacterized LOC106379716	-14.0936	7.33431e-08
LOC106408319	uncharacterized LOC106408319	1.93909	7.33891e-08
LOC106349246	serine/threonine-protein kinase HT1-like	1.8412	7.55804e-08
LOC106433849	anamorsin homolog	-1.14156	7.5986e-08
LOC106374535	stigma-specific STIG1-like protein 1	13.0423	7.69379e-08
LOC106377637	putative UDP-arabinose 4-epimerase 4	2.4385	7.75231e-08
LOC106418581	potassium transporter 6	1.40734	7.85416e-08
LOC106345965	protein PHR1-LIKE 1-like	1.38334	7.95525e-08
LOC106452464	probable protein phosphatase 2C 65	1.51676	7.99681e-08
LOC106416623	uncharacterized LOC106416623	11.323	8.04371e-08
LOC106396488	calmodulin-binding protein 60 G-like	3.28262	8.0503e-08
LOC106419466	ethylene-responsive transcription factor CRF3-like	1.57655	8.07009e-08
LOC106381883	putative cysteine-rich receptor-like protein kinase 39	2.00673	8.09443e-08
LOC106376826	receptor-like protein kinase HSL1	1.2318	8.26721e-08
LOC106346857	protein YLS9-like	1.46949	8.37102e-08
LOC106404805	uncharacterized protein At1g66480	2.03992	8.3754e-08
LOC106416410	transcription factor TGA4-like	1.47676	8.39133e-08
LOC106382631	homeobox protein knotted-1-like 3	1.55858	8.60407e-08
LOC106446380	L-type lectin-domain containing receptor kinase IV.1-like	1.7581	8.63522e-08
LOC106406765	uncharacterized WD repeat-containing protein C2A9.03-like	1.39469	8.64236e-08
LOC106367068	L-type lectin-domain containing receptor kinase S.1-like	1.31742	8.66317e-08
LOC106388001	receptor like protein kinase S.2	1.71597	8.66358e-08
LOC106379717	NADPH--cytochrome P450 reductase 2-like	-5.52736	8.81953e-08
LOC106346111	uncharacterized LOC106346111	-13.0263	8.82123e-08
LOC106366181	jmjC domain-containing protein 4-like	-1.91909	8.83422e-08
LOC106365377	uncharacterized LOC106365377	2.50612	8.88198e-08
LOC106406721	hexokinase-3	2.09748	8.88842e-08
LOC106346849	leucine-rich repeat receptor-like protein kinase PEPR2	2.46117	8.94074e-08
LOC106380660	uncharacterized LOC106380660	-13.9949	9.09031e-08
LOC106441093	probable mannose-1-phosphate guanylyltransferase 3	1.84903	9.19901e-08
LOC106350370	two-component response regulator ARR4-like	-1.72506	9.29475e-08
LOC106382824	guanylate kinase 2-like	1.60152	9.31067e-08
LOC106353760	protein NRT1/ PTR FAMILY 5.11-like	3.0333	9.44182e-08
LOC106389385	MACPF domain-containing protein CAD1	1.48337	9.49283e-08
LOC106399321	uncharacterized LOC106399321	-13.7227	9.52305e-08
LOC106412061	beta-glucosidase 27-like	3.22714	9.5231e-08
LOC106402927	probable ubiquitin-conjugating enzyme E2 25	1.64744	9.59893e-08
LOC106389678	auxin-responsive protein SAUR64-like	-2.14502	9.76257e-08
LOC106396002	heat stress transcription factor A-7a-like	3.216	9.78374e-08
LOC106381179	PRA1 family protein F3-like	2.3875	9.9056e-08
LOC106447959	acid beta-fructofuranosidase 3	-13.0112	9.9817e-08
LOC106451519	uncharacterized LOC106451519	1.09523	1.01226e-07
LOC106440483	probable protein S-acyltransferase 13	1.03781	1.01772e-07
LOC106405905	cysteine-rich receptor-like protein kinase 11	3.08199	1.02574e-07
LOC106386894	uncharacterized LOC106386894	5.96844	1.02918e-07
LOC106375992	uncharacterized LOC106375992	2.30626	1.03916e-07
LOC106380797	disease resistance protein TAO1-like	2.15138	1.04819e-07
LOC106375626	calmodulin-binding transcription activator 4-like	2.03318	1.06001e-07
LOC106386773	uncharacterized LOC106386773	1.20049	1.07274e-07
LOC106402985	tRNA-specific adenosine deaminase 2-like	2.53015	1.08314e-07
LOC106377178	tubulin-folding cofactor B	1.0508	1.09929e-07
LOC106437235	receptor-like protein kinase THESEUS 1	1.77742	1.10335e-07
LOC106364182	la-related protein 1C-like	2.38126	1.11585e-07
LOC106374606	uncharacterized LOC106374606	-2.4836	1.11768e-07
LOC106345635	bifunctional L-3-cyanoalanine synthase/cysteine synthase D1-like	-1.66509	1.12002e-07
LOC106392576	cellulose synthase A catalytic subunit 2 [UDP-forming]-like	2.21178	1.12219e-07
LOC106379423	uncharacterized LOC106379423	1.41935	1.12412e-07
LOC106348607	scarecrow-like protein 1	1.08866	1.12796e-07
LOC106443622	ribonuclease 1	3.02546	1.13506e-07
LOC106392719	tetraspanin-9-like	12.5353	1.14077e-07
LOC106384265	fasciclin-like arabinogalactan protein 16	1.39105	1.1756e-07
LOC106407194	L-ascorbate oxidase homolog	2.46543	1.2109e-07
LOC106452428	probable monodehydroascorbate reductase	1.04467	1.21553e-07
LOC106386622	uncharacterized LOC106386622	11.4707	1.23843e-07
LOC106353095	probable mediator of RNA polymerase II transcription subunit 37c	2.05189	1.24025e-07
LOC106418602	inactive GDSL esterase/lipase-like protein 25	1.52146	1.24624e-07
LOC106438130	uncharacterized LOC106438130	3.38183	1.25502e-07
LOC106383586	glutathione S-transferase T3-like	13.3172	1.26491e-07
LOC106375335	uncharacterized LOC106375335	-2.58454	1.28127e-07
LOC106453051	cell cycle checkpoint control protein RAD9A	-2.95887	1.29736e-07
LOC106437593	CBL-interacting serine/threonine-protein kinase 11-like	1.26197	1.31146e-07
LOC106451511	17.6 kDa class I heat shock protein 2-like	1.87651	1.32806e-07
LOC106404669	uncharacterized LOC106404669	1.81926	1.34002e-07
LOC106390564	uncharacterized LOC106390564	1.33202	1.34049e-07
LOC106439247	uncharacterized LOC106439247	1.88028	1.35132e-07
LOC106410100	callose synthase 3	2.03461	1.35261e-07
LOC106401075	uncharacterized LOC106401075	-1.63387	1.35288e-07
LOC106410101	uncharacterized LOC106410101	1.72169	1.35416e-07
LOC106361276	disease resistance protein TAO1-like	3.8577	1.35602e-07
LOC106443173	auxin-responsive protein SAUR21-like	-1.98254	1.3901e-07
LOC106397286	uncharacterized LOC106397286	1.38883	1.39808e-07
LOC106362197	MLP-like protein 31	1.74518	1.40301e-07
LOC106416465	uncharacterized LOC106416465	1.3006	1.40631e-07
LOC106392077	uncharacterized LOC106392077	1.79113	1.40908e-07
LOC106380051	uncharacterized LOC106380051	-13.3519	1.42356e-07
LOC106380541	uncharacterized LOC106380541	11.0506	1.42798e-07
LOC106357226	TMV resistance protein N-like	1.40928	1.43355e-07
LOC106348176	cellulose synthase A catalytic subunit 2 [UDP-forming]	1.55523	1.43949e-07
LOC106366296	L-ascorbate oxidase homolog	1.33684	1.44314e-07
LOC106410999	SNAP25 homologous protein SNAP33	1.36572	1.44833e-07
LOC106364758	uncharacterized LOC106364758	1.47205	1.45241e-07
LOC106367109	pectinesterase 1-like	1.1096	1.46185e-07
LOC106356947	uncharacterized LOC106356947	4.6888	1.47405e-07
LOC106399326	ethylene-responsive transcription factor ERF012-like	1.7216	1.49404e-07
LOC106404178	beta-D-glucopyranosyl abscisate beta-glucosidase-like	3.00053	1.55385e-07
LOC106408578	protein EDS1B-like	1.91346	1.5611e-07
LOC106395855	21 kDa protein-like	-5.65839	1.56815e-07
LOC106383051	glycine-rich protein A3-like	1.35179	1.56908e-07
LOC106423085	CASP-like protein 5A1	1.45535	1.56938e-07
LOC106367426	22.0 kDa heat shock protein-like	5.5439	1.57864e-07
LOC106365901	uncharacterized LOC106365901	-2.01851	1.60256e-07
LOC106382550	uncharacterized LOC106382550	2.42796	1.61943e-07
LOC106369260	uncharacterized LOC106369260	1.77422	1.62657e-07
LOC106406849	chaperone protein ClpB1-like	2.06627	1.64467e-07
LOC106379079	probable methyltransferase PMT26	1.06853	1.66583e-07
LOC106454808	uncharacterized LOC106454808	4.12536	1.66627e-07
LOC106446288	putative cysteine-rich receptor-like protein kinase 32	1.99569	1.67291e-07
LOC106375766	U-box domain-containing protein 20-like	3.59004	1.6856e-07
LOC106438833	E3 ubiquitin-protein ligase PRT6-like	-1.16897	1.7051e-07
LOC106441512	uncharacterized LOC106441512	2.3314	1.73758e-07
LOC106438703	heat stress transcription factor B-1-like	1.24039	1.73997e-07
LOC106377834	lipoxygenase 2	3.09459	1.74552e-07
LOC106397490	uncharacterized LOC106397490	13.1989	1.75855e-07
LOC106376998	uncharacterized LOC106376998	-2.15304	1.76094e-07
LOC106443805	uncharacterized LOC106443805	1.30122	1.78882e-07
LOC106374908	uncharacterized LOC106374908	-2.52387	1.79884e-07
LOC106404504	uncharacterized LOC106404504	1.1177	1.81538e-07
LOC106346858	protein YLS9-like	1.50877	1.81539e-07
LOC106384847	calmodulin-interacting protein 111-like	1.89754	1.81783e-07
LOC106414403	ethylene-responsive transcription factor ERF025-like	5.44086	1.82475e-07
LOC106405619	uncharacterized LOC106405619	1.77034	1.83476e-07
LOC106361460	uncharacterized LOC106361460	-12.1432	1.87143e-07
LOC106439897	uncharacterized LOC106439897	2.10681	1.87521e-07
LOC106380458	uncharacterized LOC106380458	2.97993	1.87607e-07
LOC106415916	E3 ubiquitin-protein ligase RHA2A	-1.29391	1.87736e-07
LOC106408997	protein NRT1/ PTR FAMILY 2.10-like	1.06048	1.88187e-07
LOC106346936	probable purine permease 14	1.97107	1.88364e-07
LOC106452538	probable sugar phosphate/phosphate translocator At3g11320	1.11216	1.90588e-07
LOC106381293	uncharacterized LOC106381293	1.60293	1.91581e-07
LOC106453025	gibberellin receptor GID1A-like	-2.47083	1.93609e-07
LOC106376925	heat stress transcription factor A-7a-like	1.77364	1.93673e-07
LOC106385436	uncharacterized LOC106385436	-13.1464	1.99701e-07
LOC106410677	protein VARIATION IN COMPOUND TRIGGERED ROOT growth response-like	3.22338	1.99733e-07
LOC106380141	GATA transcription factor 16-like	1.22137	1.99865e-07
LOC106407742	serine/threonine-protein kinase HT1-like	1.37128	2.0003e-07
LOC106446123	WRKY transcription factor 18-like	2.73281	2.00081e-07
LOC106348605	scarecrow-like protein 1	1.08402	2.0039e-07
LOC106367310	zinc finger protein ZAT10-like	2.93705	2.00454e-07
LOC106438004	calmodulin-5	1.56342	2.02028e-07
LOC106354295	alpha-dioxygenase 2-like	1.30089	2.02501e-07
LOC106364812	serine/threonine-protein kinase-like protein CCR1	2.10906	2.0303e-07
LOC106346894	probable calcium-binding protein CML27	2.14273	2.04362e-07
LOC106410885	lipase-like PAD4	1.78124	2.04563e-07
LOC106347962	peroxidase 71-like	12.8145	2.04999e-07
LOC106353948	uncharacterized LOC106353948	-1.66649	2.0587e-07
LOC106401438	uncharacterized LOC106401438	-1.15708	2.06375e-07
LOC106381800	metalloendoproteinase 3-MMP-like	3.54571	2.07382e-07
LOC106450540	(Z)-3-hexen-1-ol acetyltransferase-like	3.03999	2.09167e-07
LOC106351899	elicitor peptide 3-like	2.33121	2.09459e-07
LOC106451764	uncharacterized LOC106451764	2.05095	2.1204e-07
LOC106387319	uncharacterized membrane protein At1g06890-like	1.56902	2.15503e-07
LOC106397404	uncharacterized LOC106397404	-1.6362	2.16873e-07
LOC106446514	uncharacterized LOC106446514	11.577	2.18967e-07
LOC106446070	ethylene-responsive transcription factor ERF106-like	-1.74141	2.2204e-07
LOC106357016	alpha-dioxygenase 2-like	3.38367	2.2518e-07
LOC106453068	lysine histidine transporter-like 7	3.51959	2.25595e-07
LOC106350347	uncharacterized LOC106350347	1.27673	2.25809e-07
LOC106415978	MLO-like protein 2	1.60298	2.27835e-07
LOC106374569	RING-H2 finger protein ATL80-like	2.23074	2.28682e-07
LOC106366323	uncharacterized LOC106366323	1.22503	2.33037e-07
LOC106453090	probable WRKY transcription factor 39	1.49363	2.35857e-07
LOC106441547	uncharacterized LOC106441547	12.8189	2.3596e-07
LOC106376460	scarecrow-like protein 30	1.85936	2.38379e-07
LOC106379602	probable ubiquitin-conjugating enzyme E2 26	1.97209	2.38763e-07
LOC106416625	uncharacterized LOC106416625	6.27659	2.38827e-07
LOC106406326	lipoxygenase 2	2.53416	2.40509e-07
LOC106348114	L-type lectin-domain containing receptor kinase IX.2-like	3.58884	2.40762e-07
LOC106387209	chaperone protein ClpB1-like	1.79681	2.42356e-07
LOC106351890	uncharacterized LOC106351890	14.2136	2.45378e-07
LOC106445437	protein kinase PINOID 2-like	-1.36688	2.4868e-07
LOC106418329	5'-adenylylsulfate reductase 1	1.46038	2.49546e-07
LOC106354215	uncharacterized LOC106354215	1.60659	2.50987e-07
LOC106354421	protein SET DOMAIN GROUP 40-like	1.13147	2.52027e-07
LOC106405965	cysteine-rich receptor-like protein kinase 2	1.89329	2.53746e-07
LOC106445305	uncharacterized LOC106445305	-1.32231	2.55335e-07
LOC106387139	E3 ubiquitin-protein ligase RNF8-like	1.55903	2.55824e-07
LOC106354342	chaperone protein ClpB1	2.67098	2.59811e-07
LOC106406901	serine/arginine-rich SC35-like splicing factor SCL33	1.17786	2.60084e-07
LOC106349688	uncharacterized LOC106349688	3.09199	2.6148e-07
LOC106438872	probable calcium-binding protein CML40	5.60059	2.62616e-07
LOC106402908	nudix hydrolase 21	12.6134	2.65168e-07
LOC106359805	probable small nuclear ribonucleoprotein F	-1.3132	2.65682e-07
LOC106372340	calcium-dependent protein kinase 7	-1.00794	2.65888e-07
LOC106389739	photosystem II 5 kDa protein	1.51581	2.6614e-07
LOC106387284	delta(7)-sterol-C5(6)-desaturase 1-like	-1.29001	2.69588e-07
LOC106415500	rRNA 2'-O-methyltransferase fibrillarin-like	4.05344	2.72242e-07
LOC106367675	ethylene-overproduction protein 1-like	1.16606	2.73048e-07
LOC106400536	thioredoxin-like protein CITRX	-2.50585	2.74001e-07
LOC106406290	U-box domain-containing protein 9-like	2.06267	2.77087e-07
LOC106394737	BON1-associated protein 1-like	2.60349	2.78122e-07
LOC106366014	dipeptidyl peptidase 8	1.25058	2.78295e-07
LOC106438779	uncharacterized protein At3g43530-like	-1.3742	2.81788e-07
LOC106449121	F-box protein At1g61340-like	2.12149	2.84809e-07
LOC106447286	uncharacterized LOC106447286	6.52889	2.86846e-07
LOC106372163	uncharacterized LOC106372163	1.77651	2.87292e-07
LOC106345956	U11/U12 small nuclear ribonucleoprotein 48 kDa protein-like	1.72109	2.87962e-07
LOC106413316	transmembrane protein 53-like	1.44693	2.89748e-07
LOC106443952	uncharacterized LOC106443952	1.07268	2.92122e-07
LOC106415499	translation initiation factor IF-2-like	13.0222	2.94938e-07
LOC106371986	myosin-binding protein 3-like	1.31036	2.95075e-07
LOC106397304	uncharacterized LOC106397304	1.31186	3.08907e-07
LOC106425847	classical arabinogalactan protein 1-like	1.53215	3.09767e-07
LOC106426619	uncharacterized LOC106426619	1.17749	3.12008e-07
LOC106354198	receptor-like protein kinase HSL1	1.09216	3.12604e-07
LOC106353840	proline-rich receptor-like protein kinase PERK9	1.19661	3.1412e-07
LOC106348454	probable GTP diphosphokinase RSH3	1.20904	3.18388e-07
LOC106413993	uncharacterized LOC106413993	3.13728	3.19837e-07
LOC106418601	beta carbonic anhydrase 4-like	1.57394	3.22424e-07
LOC106406401	uncharacterized LOC106406401	1.87637	3.30393e-07
LOC106392353	non-specific lipid-transfer protein-like protein At5g64080	2.50995	3.30504e-07
LOC106452326	receptor-like protein kinase BRI1-like 3	1.95733	3.31459e-07
LOC106375907	UPF0496 protein At2g18630-like	2.13318	3.32027e-07
LOC106348063	classical arabinogalactan protein 1-like	1.11562	3.39004e-07
LOC106437510	uncharacterized LOC106437510	-6.29627	3.39068e-07
LOC106448212	protein STRICTOSIDINE SYNTHASE-LIKE 9-like	1.39158	3.42023e-07
LOC106390070	uncharacterized LOC106390070	1.22267	3.44043e-07
LOC106446510	transcription factor MYB1R1-like	3.95451	3.45905e-07
LOC106416446	BAG family molecular chaperone regulator 1-like	1.55511	3.47028e-07
LOC106389810	uncharacterized LOC106389810	-12.9715	3.50323e-07
LOC106380532	sm-like protein LSM1B	1.56141	3.51926e-07
LOC106352066	ubiquitin-like protein ATG12A	1.89875	3.52528e-07
LOC106354528	elongation of fatty acids protein 3-like	2.67813	3.5339e-07
LOC106380017	uncharacterized LOC106380017	2.48748	3.55882e-07
LOC106376785	transcription factor bHLH112-like	1.40157	3.59236e-07
LOC106451241	RNA-binding protein 24-like	-1.44062	3.60001e-07
LOC106381084	probable choline kinase 1	2.2327	3.60067e-07
LOC106438953	zinc finger CCCH domain-containing protein 33-like	1.23223	3.60479e-07
LOC106437901	probable LRR receptor-like serine/threonine-protein kinase RKF3	1.05517	3.60925e-07
LOC106355430	receptor-like serine/threonine-protein kinase NCRK	2.86162	3.73474e-07
LOC106375635	F-box/kelch-repeat protein At1g67480-like	1.36096	3.74054e-07
LOC106390190	uncharacterized acetyltransferase At3g50280-like	2.37848	3.80361e-07
LOC106452998	alkaline/neutral invertase C	1.83471	3.81077e-07
LOC106410568	mediator of RNA polymerase II transcription subunit 13-like	1.12057	3.86843e-07
LOC106440421	uncharacterized LOC106440421	1.69906	3.89358e-07
LOC106353868	lipoxygenase 2	2.41968	3.95486e-07
LOC106372157	MATH domain and coiled-coil domain-containing protein At3g58210-like	1.13966	3.97065e-07
LOC106390324	transcription factor MYB44-like	2.28485	3.9742e-07
LOC106379817	AP2/ERF and B3 domain-containing transcription factor ARF14-like	11.9628	3.97743e-07
LOC106354388	uncharacterized LOC106354388	3.00501	4.05844e-07
LOC106443658	probable WRKY transcription factor 46	12.1621	4.05847e-07
LOC106438476	classical arabinogalactan protein 10-like	2.32725	4.11289e-07
LOC106382155	SNF1-related protein kinase catalytic subunit alpha KIN11-like	1.20664	4.11962e-07
LOC106407297	probable sucrose-phosphate synthase 2	1.96675	4.12787e-07
LOC106396525	transcription factor TCP21-like	1.32381	4.1619e-07
LOC106405230	uncharacterized LOC106405230	-14.1338	4.18333e-07
LOC106358180	UDP-glycosyltransferase 85A3-like	-1.41156	4.18443e-07
LOC106437795	uncharacterized LOC106437795	1.74673	4.19353e-07
LOC106447220	protein kinase PINOID-like	1.38371	4.20746e-07
LOC106349124	uncharacterized LOC106349124	1.07327	4.25627e-07
LOC106359855	uncharacterized LOC106359855	-2.0858	4.31816e-07
LOC106451287	uncharacterized LOC106451287	-1.80856	4.33832e-07
LOC106438194	UDP-galactose/UDP-glucose transporter 1	1.01441	4.3778e-07
LOC106451289	26S proteasome non-ATPase regulatory subunit 1 homolog A-like	-1.56219	4.41672e-07
LOC106369588	uncharacterized LOC106369588	1.0956	4.46684e-07
LOC106359795	ethylene-responsive transcription factor ERF043-like	3.20689	4.5181e-07
LOC106452481	uncharacterized protein At3g43530-like	-1.38632	4.55883e-07
LOC106372043	protein PHR1-LIKE 1-like	1.04941	4.57564e-07
LOC106385154	probable trehalose-phosphate phosphatase I	3.25536	4.59609e-07
LOC106407213	uncharacterized LOC106407213	1.20935	4.60071e-07
LOC106406451	putative methyltransferase DDB_G0268948	1.56424	4.62121e-07
LOC106366718	uncharacterized protein At3g43530-like	-1.40084	4.62187e-07
LOC106381928	uncharacterized LOC106381928	-12.6364	4.63369e-07
LOC106451054	aldo-keto reductase family 4 member C9-like	12.0548	4.64074e-07
LOC106381515	uncharacterized protein At3g43530-like	-1.62974	4.6958e-07
LOC106375988	probable WRKY transcription factor 53	2.7959	4.70745e-07
LOC106364651	uncharacterized LOC106364651	1.17065	4.74524e-07
LOC106368562	chlorophyllide a oxygenase	1.14826	4.80904e-07
LOC106449460	protein C2-DOMAIN ABA-RELATED 1	12.6235	4.81005e-07
LOC106390582	probable WRKY transcription factor 41	1.9724	4.81156e-07
LOC106348911	glutamic acid-rich protein-like	1.3064	4.87303e-07
LOC106361422	uncharacterized LOC106361422	-2.122	4.92139e-07
LOC106410673	lipoxygenase 6	1.05523	4.94459e-07
LOC106368083	probable WRKY transcription factor 70	1.83056	4.96542e-07
LOC106380476	probable phospholipid hydroperoxide glutathione peroxidase 6	1.2419	4.98183e-07
LOC106404537	uncharacterized protein At5g08430-like	-1.66113	5.01428e-07
LOC106416641	tonoplast dicarboxylate transporter-like	2.94998	5.01642e-07
LOC106414655	uncharacterized LOC106414655	-12.6585	5.01944e-07
LOC106376492	calcium-binding protein CML24-like	1.94917	5.02313e-07
LOC106389888	uncharacterized LOC106389888	1.35295	5.07188e-07
LOC106361922	AP2/ERF and B3 domain-containing transcription repressor TEM1-like	1.4923	5.12519e-07
[truncated: 2,786 more rows]

## Sheet: MT VS ST 25
Supplemental Data1. The DEGs between MS mutant and WT at different DAG.
ST: Time after germination of single-stem plants (WT), MT: Time after germination of multi-stems (MS) mutants.
DEGs were selected by p values < 0.05 and absolute values of log2 (fold change) ≥1
Gene ID	Description	log2(FC)	P-value
LOC106433369	40S ribosomal protein S24-1	-6.64019	7.97377e-175
LOC106380990	uncharacterized LOC106380990	10.8832	6.2162e-173
LOC106436104	non-specific lipid-transfer protein 3	6.89291	2.89326e-164
LOC106400726	uncharacterized protein At3g06530-like	-5.95518	1.19392e-161
LOC106356911	uncharacterized LOC106356911	6.58216	2.00888e-156
LOC106433407	40S ribosomal protein S3a	-10.1196	2.38878e-156
LOC106365667	60S ribosomal protein L23	-5.74598	8.77587e-153
LOC106454694	non-specific lipid-transfer protein 1-like	8.3541	1.12418e-151
LOC106385360	non-specific lipid-transfer protein 4-like	3.99911	1.6016e-136
LOC106365673	probable UDP-N-acetylglucosamine--peptide N-acetylglucosaminyltransferase SEC	-6.05947	1.34398e-134
LOC106385182	non-specific lipid-transfer protein 3-like	6.28226	2.39018e-134
LOC106400969	DEAD-box ATP-dependent RNA helicase 50-like	-4.87661	1.02025e-133
LOC106438835	kinesin-like protein KIF22-B	-6.73078	5.51203e-131
LOC106385319	uncharacterized LOC106385319	-4.66061	1.40255e-125
LOC106451134	ubiquitin-60S ribosomal protein L40	-4.12998	8.45147e-124
LOC106349210	probable galacturonosyltransferase 9	6.70775	5.76494e-121
LOC106361839	non-specific lipid-transfer protein 4-like	4.95389	6.6021e-119
LOC106349205	uncharacterized protein At1g04910-like	4.71222	1.4465e-118
LOC106349686	glyoxysomal fatty acid beta-oxidation multifunctional protein MFP-a-like	-4.88792	7.69771e-118
LOC106398694	thioredoxin-like protein AAED1	4.61541	9.20523e-111
LOC106366833	60S ribosomal protein L32-1	-3.21855	1.23584e-107
LOC106392257	dehydrin Rab18-like	9.24907	2.04506e-106
LOC106445023	uncharacterized LOC106445023	6.35954	3.96002e-105
LOC106376336	60S ribosomal protein L8-3	4.01766	1.52796e-100
LOC106454868	40S ribosomal protein S13-2-like	-9.76222	5.01194e-100
LOC106349212	6-phosphogluconate dehydrogenase	3.97832	2.72553e-98
LOC106449541	glutathione S-transferase T3-like	6.77014	1.64706e-94
LOC106417365	non-specific lipid-transfer protein 4-like	4.67262	3.44728e-93
LOC106406593	DEAD-box ATP-dependent RNA helicase 14-like	10.0148	1.30117e-92
LOC106453015	sodium/hydrogen exchanger 2-like	-6.60903	4.60321e-92
LOC106375483	uncharacterized LOC106375483	-6.97152	7.02252e-92
LOC106370906	uncharacterized LOC106370906	5.61493	3.30841e-91
LOC106447286	uncharacterized LOC106447286	4.98641	1.77426e-90
LOC106400994	putative chromatin-remodeling complex ATPase chain	-5.75675	2.58387e-89
LOC106390013	cytochrome P450 82C4	9.35486	3.82948e-88
LOC106404679	uncharacterized LOC106404679	5.95543	2.61031e-87
LOC106445690	tRNA(His) guanylyltransferase 1	3.73712	8.42057e-85
LOC106400945	probable acyl-CoA dehydrogenase IBR3	-2.72146	1.26873e-83
LOC106453023	cingulin-like	-4.55279	2.11232e-81
LOC106452082	uncharacterized LOC106452082	6.094	6.15671e-81
LOC106345884	non-specific lipid-transfer protein 3-like	6.80031	5.57949e-76
LOC106366343	dehydrin Rab18-like	9.80665	1.14326e-74
LOC106440263	expansin-like B1	5.51713	5.13293e-74
LOC106372626	polyubiquitin	3.52874	5.87604e-74
LOC106364421	ultraviolet-B receptor UVR8-like	8.35324	5.57874e-73
LOC106418259	uncharacterized LOC106418259	3.46083	1.47742e-72
LOC106345834	glycine-rich protein 3-like	4.44229	2.29698e-70
LOC106361838	non-specific lipid-transfer protein 4-like	4.21169	9.62814e-70
LOC106433858	protein PIR-like	-2.74728	8.10505e-69
LOC106453049	uncharacterized LOC106453049	-3.38723	2.45239e-68
LOC106401569	uncharacterized LOC106401569	-3.49922	6.11061e-68
LOC106381440	uncharacterized LOC106381440	10.2158	5.26003e-67
LOC106365674	40S ribosomal protein S16-3-like	-5.30041	3.68244e-66
LOC106400534	serine/threonine-protein phosphatase 4 regulatory subunit 3-like	-4.5633	2.92351e-64
LOC106404633	non-specific lipid-transfer protein 1-like	3.95404	1.88501e-62
LOC106358424	photosystem II 5 kDa protein	2.71755	3.98212e-62
LOC106381716	cyclin-dependent kinase F-4-like	9.10559	2.09901e-61
LOC106346100	serine/threonine-protein phosphatase 4 regulatory subunit 3-like	-3.9488	3.21515e-61
LOC106453014	probable serine/threonine-protein kinase At1g54610	-5.57216	2.83391e-60
LOC106364921	uncharacterized LOC106364921	7.13492	1.89594e-59
LOC106365675	glyceraldehyde-3-phosphate dehydrogenase	-3.67661	1.06285e-58
LOC106415626	UDP-D-apiose/UDP-D-xylose synthase 2-like	-2.40429	8.05252e-58
LOC106440145	expansin-like B1	6.00014	6.14283e-57
LOC106447279	tropinone reductase homolog At2g29370-like	-3.86324	4.01105e-56
LOC106387118	uncharacterized LOC106387118	8.57761	4.09856e-55
LOC106390436	uncharacterized LOC106390436	-5.7339	2.30581e-54
LOC106359782	uncharacterized LOC106359782	4.62893	5.87306e-54
LOC106397772	4-coumarate--CoA ligase 4-like	4.34091	6.73203e-54
LOC106397087	protein DEHYDRATION-INDUCED 19 homolog 4-like	-9.16798	8.62471e-54
LOC106454808	uncharacterized LOC106454808	6.92662	8.79939e-54
LOC106377835	lipoxygenase 2	2.17578	1.44127e-53
LOC106401717	CAS1 domain-containing protein 1-like	-6.0728	7.16683e-53
LOC106372487	MADS-box protein FLOWERING LOCUS C-like	3.04941	2.60681e-52
LOC106451283	protein disulfide-isomerase 2-3	-2.50708	9.37076e-52
LOC106358201	extensin-3-like	2.74136	1.15068e-51
LOC106345841	uncharacterized LOC106345841	10.2096	2.73555e-51
LOC106437510	uncharacterized LOC106437510	-4.79463	4.59314e-51
LOC106397336	probable histone-arginine methyltransferase 1.3	-3.12198	5.42725e-51
LOC106366808	acyl-[acyl-carrier-protein] desaturase 5	3.05992	1.86904e-50
LOC106378422	nucleoid-associated protein PCC8801_2554-like	3.7443	1.98283e-50
LOC106353868	lipoxygenase 2	2.39635	3.49652e-50
LOC106390509	uncharacterized LOC106390509	-4.0433	3.23563e-49
LOC106354656	histone acetyltransferase HAC1-like	-4.27633	3.2842e-49
LOC106440264	expansin-like B1	5.92686	9.0684e-49
LOC106451073	uncharacterized LOC106451073	3.22249	1.13694e-48
LOC106381605	uncharacterized isomerase BH0283-like	3.23379	1.31624e-48
LOC106366328	thiosulfate sulfurtransferase 16	2.14546	1.62001e-48
LOC106438690	bifunctional 3-dehydroquinate dehydratase/shikimate dehydrogenase	-3.21775	2.14625e-48
LOC106385598	uncharacterized LOC106385598	-9.35075	2.39175e-48
LOC106368428	uncharacterized LOC106368428	3.59676	2.78321e-48
LOC106349214	uncharacterized LOC106349214	4.39587	7.03289e-48
LOC106366804	thioredoxin F-type	10.8266	3.78728e-47
LOC106369987	uncharacterized LOC106369987	7.25857	4.67983e-47
LOC106381714	cyclin-dependent kinase F-4-like	7.88113	7.11096e-47
LOC106400131	myosin-11	-2.36907	4.19641e-46
LOC106445531	putative lipid-transfer protein DIR1	2.96363	5.92596e-46
LOC106346061	splicing factor U2af large subunit B-like	1.67612	1.20491e-45
LOC106452370	DCN1-like protein 2	2.20768	1.33306e-45
LOC106416715	tetrahydrocannabinolic acid synthase-like	2.36247	2.77589e-45
LOC106352909	transcription factor bHLH148-like	-9.40973	4.87521e-45
LOC106448997	vacuolar cation/proton exchanger 1-like	2.85361	5.34304e-45
LOC106453198	inositol-phosphate phosphatase	4.01348	1.08126e-44
LOC106387872	uncharacterized LOC106387872	-5.11759	3.61884e-44
LOC106400574	beta-glucosidase-like SFR2	-3.06067	9.22475e-44
LOC106355888	lipoxygenase 2	2.64921	1.59927e-43
LOC106369026	polyubiquitin	3.37527	2.04337e-43
LOC106348750	protein DEHYDRATION-INDUCED 19 homolog 4-like	1.9871	6.47014e-43
LOC106454850	uncharacterized LOC106454850	4.97624	8.72022e-43
LOC106361087	vacuolar protein sorting-associated protein 45 homolog	2.29552	9.01652e-43
LOC106387753	microfibrillar-associated protein 1-like	2.39966	1.96495e-42
LOC106451321	protein usf-like	3.05241	3.05312e-42
LOC106362991	uncharacterized LOC106362991	9.57689	7.08969e-42
LOC106401265	RAF proto-oncogene serine/threonine-protein kinase-like	-7.84002	1.17602e-41
LOC106447116	profilin-1-like	-2.2633	1.91561e-41
LOC106356752	uncharacterized LOC106356752	10.1902	3.12079e-41
LOC106362995	E3 ubiquitin-protein ligase At1g63170-like	3.1722	9.05021e-41
LOC106352980	extensin-3-like	2.92481	1.68352e-40
LOC106391225	glutamate receptor 2.8-like	-2.4889	2.68113e-40
LOC106389546	uncharacterized LOC106389546	-3.48678	7.44797e-40
LOC106387931	non-specific lipid-transfer protein 3-like	2.2914	1.07556e-39
LOC106453001	elongation of fatty acids protein 3-like	2.65112	1.31009e-39
LOC106350872	S-adenosylmethionine decarboxylase proenzyme 3-like	2.63051	1.48873e-39
LOC106365665	protein EIN4	-5.21747	4.40572e-39
LOC106406863	uncharacterized LOC106406863	-2.89277	4.46935e-39
LOC106366817	LOB domain-containing protein 41-like	2.78089	5.10952e-39
LOC106445308	T-complex protein 1 subunit theta-like	-2.14302	1.09126e-38
LOC106415083	uncharacterized LOC106415083	-3.26019	1.37853e-38
LOC106397193	uncharacterized LOC106397193	3.01036	3.18568e-38
LOC106354655	NADH dehydrogenase [ubiquinone] iron-sulfur protein 8-A	-10.0425	6.27369e-38
LOC106453045	protein ALWAYS EARLY 2	-1.60414	9.73724e-38
LOC106447281	tropinone reductase homolog At2g29320-like	-4.23036	1.52613e-37
LOC106389521	UDP-galactose transporter 1-like	-5.02687	1.95866e-37
LOC106395965	delta-1-pyrroline-5-carboxylate synthase A	2.4647	1.99172e-37
LOC106416641	tonoplast dicarboxylate transporter-like	4.62733	3.85654e-37
LOC106387750	cation/calcium exchanger 2-like	3.79043	4.22336e-37
LOC106354076	methyltransferase-like protein 7A	3.17806	1.20498e-36
LOC106390601	40S ribosomal protein S23-2	3.43757	1.48965e-36
LOC106418001	uncharacterized LOC106418001	3.92325	1.71911e-36
LOC106451757	protein transport protein Sec24-like At3g07100	-9.66595	2.24148e-36
LOC106451289	26S proteasome non-ATPase regulatory subunit 1 homolog A-like	-2.3591	2.76402e-36
LOC106444733	glycine-rich protein DOT1-like	2.57454	3.28253e-36
LOC106451951	non-specific lipid-transfer protein 2-like	2.29194	3.71621e-36
LOC106386617	serine/threonine-protein kinase ULK4-like	2.02876	6.7716e-36
LOC106370686	beta-amylase 5-like	3.5007	1.1257e-35
LOC106364420	uncharacterized LOC106364420	9.66019	2.03399e-35
LOC106445315	putative H/ACA ribonucleoprotein complex subunit 1-like protein 1	-2.20484	6.1108e-35
LOC106354399	HVA22-like protein a	-3.61831	6.97207e-35
LOC106415318	probable fructose-bisphosphate aldolase 1	2.48022	7.74282e-35
LOC106348748	probable acyl-CoA dehydrogenase IBR3	1.63746	1.11071e-34
LOC106387756	uncharacterized LOC106387756	2.79759	1.16029e-34
LOC106366843	mitochondrial carnitine/acylcarnitine carrier-like protein	3.64673	2.08404e-34
LOC106453218	thioredoxin F1	3.91814	2.9542e-34
LOC106372588	uncharacterized LOC106372588	1.9295	5.12872e-34
LOC106451021	delta-1-pyrroline-5-carboxylate synthase A-like	2.06272	5.39004e-34
LOC106372852	putative glycine-rich cell wall structural protein 1	4.19878	9.3025e-34
LOC106381762	3-oxoacyl-[acyl-carrier-protein] synthase I	-9.27472	1.04395e-33
LOC106415796	scarecrow-like protein 5	-5.27361	1.10056e-33
LOC106446394	nifU-like protein 4	3.34896	1.20489e-33
LOC106451519	uncharacterized LOC106451519	1.36561	1.52521e-33
LOC106397795	uncharacterized LOC106397795	5.3314	1.69918e-33
LOC106445724	uncharacterized LOC106445724	1.95093	1.73409e-33
LOC106372317	bidirectional sugar transporter SWEET15	6.24608	2.7027e-33
LOC106354788	ent-kaur-16-ene synthase	-2.77663	3.7261e-33
LOC106406326	lipoxygenase 2	2.11111	9.71569e-33
LOC106416095	ADP	4.10258	1.00044e-32
LOC106441826	tonoplast dicarboxylate transporter-like	5.89351	1.35664e-32
LOC106453025	gibberellin receptor GID1A-like	-3.48866	1.46865e-32
LOC106418132	probable inactive leucine-rich repeat receptor-like protein kinase At3g03770	1.88593	2.49441e-32
LOC106387277	beta-catenin-like protein 1	-1.58591	3.52025e-32
LOC106437590	trans-cinnamate 4-monooxygenase	2.05252	4.48693e-32
LOC106452268	uncharacterized LOC106452268	2.52238	4.57967e-32
LOC106431253	putative F-box protein At3g23420	5.60344	7.90808e-32
LOC106450540	(Z)-3-hexen-1-ol acetyltransferase-like	4.67494	8.56041e-32
LOC106354686	uncharacterized membrane protein sll0875	-9.31587	9.51627e-32
LOC106411792	dihydroneopterin aldolase 1-like	2.65907	1.79251e-31
LOC106347169	uncharacterized LOC106347169	3.48455	2.66835e-31
LOC106349216	uncharacterized LOC106349216	2.63104	2.74664e-31
LOC106368427	uncharacterized LOC106368427	4.36608	2.87461e-31
LOC106375019	uncharacterized LOC106375019	3.96687	7.91767e-31
LOC106354665	epidermis-specific secreted glycoprotein EP1-like	1.71819	9.54436e-31
LOC106400541	60S ribosomal protein L29-1-like	-19.8904	1.82016e-30
LOC106453029	GDSL esterase/lipase At3g05180	-5.70987	2.0873e-30
LOC106357489	DNA polymerase I B	-1.80459	2.20425e-30
LOC106386625	F-box/FBD/LRR-repeat protein At5g18770-like	1.98098	2.82635e-30
LOC106450288	aquaporin NIP2-1-like	-18.5384	4.10046e-30
LOC106360912	non-specific lipid-transfer protein 2-like	2.54752	1.06235e-29
LOC106451439	replication protein A 70 kDa DNA-binding subunit B-like	3.59699	1.10598e-29
LOC106452997	beta-glucosidase-like SFR2	1.5922	1.19061e-29
LOC106360514	non-specific lipid-transfer protein 2-like	2.25296	1.72669e-29
LOC106453042	microtubule-binding protein TANGLED	-3.24751	1.9251e-29
LOC106352955	serine/threonine-protein kinase PAK 3-like	-3.8368	2.06045e-29
LOC106372579	trafficking protein particle complex subunit 4-like	2.46487	2.19168e-29
LOC106446112	cingulin-like	2.82435	2.39912e-29
LOC106345193	uncharacterized LOC106345193	8.59183	2.91207e-29
LOC106346110	protein DEHYDRATION-INDUCED 19 homolog 4-like	-18.3252	3.03634e-29
LOC106401750	uncharacterized LOC106401750	-1.8887	3.47003e-29
LOC106366814	40S ribosomal protein S7	1.30707	4.15886e-29
LOC106360694	plasminogen activator inhibitor 1 RNA-binding protein-like	5.0599	5.05255e-29
LOC106401231	probable inactive serine/threonine-protein kinase fnkC	1.59623	5.76343e-29
LOC106366802	beta-catenin-like protein 1	17.2151	7.47432e-29
LOC106352821	linoleate 9S-lipoxygenase 5	3.27813	9.15847e-29
LOC106445126	uncharacterized LOC106445126	-2.52913	1.02324e-28
LOC106383226	uncharacterized LOC106383226	7.23824	1.56147e-28
LOC106405982	coleoptile phototropism protein 1-like	-3.94958	2.67017e-28
LOC106386629	50S ribosomal protein L33-like	2.16019	5.91856e-28
LOC106405618	uncharacterized LOC106405618	-3.74182	6.92332e-28
LOC106352581	uncharacterized LOC106352581	-3.21462	8.94635e-28
LOC106411750	uncharacterized LOC106411750	3.13526	1.01961e-27
LOC106364947	uncharacterized LOC106364947	4.00724	1.05055e-27
LOC106372614	uncharacterized LOC106372614	7.36368	1.05655e-27
LOC106400946	twist-related protein 1-like	-9.88725	1.29329e-27
LOC106357500	uncharacterized LOC106357500	2.84399	1.44544e-27
LOC106409363	O-acyltransferase WSD1-like	-2.05483	1.51066e-27
LOC106451642	4-coumarate--CoA ligase 1	2.18842	1.6099e-27
LOC106363404	50S ribosomal protein HLP	4.08872	1.96021e-27
LOC106389628	bifunctional 3-dehydroquinate dehydratase/shikimate dehydrogenase	-16.5892	1.97211e-27
LOC106372582	metallothionein-like protein type 2	2.86154	2.01266e-27
LOC106453012	acyl carrier protein	-18.5341	2.34444e-27
LOC106348929	uncharacterized LOC106348929	3.14732	3.0848e-27
LOC106453071	trafficking protein particle complex subunit 6B-like	1.82854	3.11113e-27
LOC106362990	uncharacterized LOC106362990	9.22321	3.206e-27
LOC106387746	NADH--cytochrome b5 reductase 1	1.64305	3.56744e-27
LOC106360628	beta-amylase 5	3.16961	4.43354e-27
LOC106397587	bifunctional 3-dehydroquinate dehydratase/shikimate dehydrogenase	-2.8342	7.14688e-27
LOC106387184	ubiquitin carboxyl-terminal hydrolase 23-like	2.06712	8.92685e-27
LOC106382158	protein AIG2-like	2.37772	9.94865e-27
LOC106389703	uncharacterized LOC106389703	2.97887	1.05169e-26
LOC106381674	disease resistance RPP13-like protein 4	-3.63504	1.0562e-26
LOC106438508	alpha-aminoadipic semialdehyde synthase	3.00986	2.04972e-26
LOC106400542	60S ribosomal protein L29-1-like	-19.1213	2.21117e-26
LOC106354802	wall-associated receptor kinase-like 10	-4.40629	2.81734e-26
LOC106445709	uncharacterized LOC106445709	-2.39914	3.04152e-26
LOC106347543	uncharacterized LOC106347543	16.2394	3.37797e-26
LOC106381715	uncharacterized LOC106381715	6.57836	3.55562e-26
LOC106401005	sucrose transport protein SUC2-like	1.89917	3.86566e-26
LOC106447488	uncharacterized LOC106447488	1.67325	5.41241e-26
LOC106451431	uncharacterized LOC106451431	8.41026	6.05486e-26
LOC106453019	WD repeat-containing protein 48-like	-15.9858	6.99084e-26
LOC106411135	nucleobase-ascorbate transporter 5	2.05455	7.19624e-26
LOC106362760	peroxidase 32	1.85239	7.93506e-26
LOC106346142	probable inactive serine/threonine-protein kinase fnkC	1.32931	8.26183e-26
LOC106346108	multiple organellar RNA editing factor 3	-7.69007	8.60752e-26
LOC106450532	phospholipase A(1) LCAT3	1.59744	9.25506e-26
LOC106365668	uncharacterized LOC106365668	-16.4263	9.66483e-26
LOC106354769	proteasome subunit alpha type-2-A	-17.5182	9.71034e-26
LOC106357763	uncharacterized LOC106357763	2.65437	9.73603e-26
LOC106372175	vegetative cell wall protein gp1-like	1.26882	1.01214e-25
LOC106368501	uncharacterized protein C24B11.05-like	3.38278	1.35491e-25
LOC106389825	nuclear pore complex protein NUP58-like	2.46854	1.36447e-25
LOC106382906	flavonol synthase 3-like	1.83184	1.36927e-25
LOC106453002	uncharacterized LOC106453002	-16.9037	1.387e-25
LOC106451769	proteasome subunit beta type-2-A-like	-17.838	1.75193e-25
LOC106399120	rab proteins geranylgeranyltransferase component A 2-like	-16.9887	1.81476e-25
LOC106354669	uncharacterized LOC106354669	-9.43386	2.07808e-25
LOC106354691	alpha	-15.6706	2.28502e-25
LOC106453021	probable polygalacturonase	-16.4174	2.31261e-25
LOC106391834	defensin-like protein 2	1.78593	2.41997e-25
LOC106390156	uncharacterized LOC106390156	17.3882	2.62782e-25
LOC106369008	uncharacterized LOC106369008	2.75331	3.16959e-25
LOC106398793	phenylalanine ammonia-lyase 1-like	2.82839	3.18626e-25
LOC106442725	aspartic proteinase A2-like	1.80594	3.23982e-25
LOC106354075	methyltransferase-like protein 7A	2.6802	3.34048e-25
LOC106354685	50S ribosomal protein L13	-19.1397	3.46361e-25
LOC106366807	mannose-6-phosphate isomerase 1-like	16.6275	3.54517e-25
LOC106399975	uncharacterized LOC106399975	-1.88109	3.88689e-25
LOC106415904	annexin D1-like	1.76818	4.13095e-25
LOC106447616	5-methyltetrahydropteroyltriglutamate--homocysteine methyltransferase 2-like	1.56568	4.26838e-25
LOC106431141	protein FIZZY-RELATED 3	-1.3478	4.85961e-25
LOC106372453	aspartic proteinase nepenthesin-2-like	16.4296	8.3387e-25
LOC106369993	uncharacterized LOC106369993	2.25277	8.6436e-25
LOC106453020	coiled-coil domain-containing protein 12-like	-17.7549	1.04914e-24
LOC106403511	adenosine kinase 2-like	-3.01208	1.10794e-24
LOC106368372	uncharacterized LOC106368372	11.2244	1.16835e-24
LOC106451432	uncharacterized LOC106451432	10.6486	1.31169e-24
LOC106451429	uncharacterized LOC106451429	10.6238	1.77641e-24
LOC106397068	leucine-rich repeat receptor-like serine/threonine-protein kinase At2g14510	-1.93695	1.98778e-24
LOC106452270	uncharacterized LOC106452270	1.26641	2.26273e-24
LOC106372176	30S ribosomal protein 3-2	-2.62367	2.90324e-24
LOC106400535	thioredoxin-like protein CITRX	-3.35409	3.16456e-24
LOC106400741	uncharacterized LOC106400741	4.17819	3.63959e-24
LOC106445910	protein STRICTOSIDINE SYNTHASE-LIKE 9-like	1.58759	4.59014e-24
LOC106349507	glucose-1-phosphate adenylyltransferase large subunit 3	1.87064	5.60688e-24
LOC106445252	protein STRICTOSIDINE SYNTHASE-LIKE 8-like	1.73172	5.62351e-24
LOC106352568	receptor-like serine/threonine-protein kinase NCRK	2.76654	5.82795e-24
LOC106371986	myosin-binding protein 3-like	1.90953	7.48267e-24
LOC106388107	CASP-like protein 2B1	2.42408	7.98894e-24
LOC106357764	uncharacterized LOC106357764	16.9069	8.49261e-24
LOC106410673	lipoxygenase 6	1.32307	8.74589e-24
LOC106451497	uncharacterized LOC106451497	-5.65603	9.11434e-24
LOC106349213	FHA domain-containing protein At4g14490-like	6.1431	1.0247e-23
LOC106364402	uncharacterized LOC106364402	16.8971	1.05046e-23
LOC106451764	uncharacterized LOC106451764	2.43311	1.35432e-23
LOC106443160	PITH domain-containing protein At3g04780-like	-17.2653	1.56725e-23
LOC106400867	uncharacterized LOC106400867	4.46001	1.71177e-23
LOC106387487	uncharacterized LOC106387487	15.5795	1.73468e-23
LOC106352282	probable tRNA (guanine(26)-N(2))-dimethyltransferase 2	-2.04421	1.76581e-23
LOC106354428	nitrilase 2-like	2.27733	2.37371e-23
LOC106372489	beta-amylase 5-like	2.96779	2.5496e-23
LOC106388279	protein COLD-REGULATED 15B	2.39652	2.79514e-23
LOC106385303	50S ribosomal protein 6	6.32335	2.86296e-23
LOC106371603	uncharacterized LOC106371603	-16.2965	3.20271e-23
LOC106366310	subtilisin-like protease SBT1.7	4.09035	3.61641e-23
LOC106372576	E3 ubiquitin-protein ligase PRT6-like	1.26473	3.66198e-23
LOC106400578	3-dehydrosphinganine reductase TSC10A	-2.08986	4.45908e-23
LOC106388158	F-box/LRR-repeat protein At2g43260-like	2.97966	4.92333e-23
LOC106346115	60S ribosomal protein L29-1-like	-17.9363	5.2327e-23
LOC106410328	probable pectate lyase 8	-1.46618	5.3528e-23
LOC106367111	uncharacterized LOC106367111	15.7624	5.87569e-23
LOC106352885	CAS1 domain-containing protein 1-like	-15.6856	6.00076e-23
LOC106451841	uncharacterized LOC106451841	16.7303	6.02177e-23
LOC106417731	uncharacterized LOC106417731	5.33111	7.02553e-23
LOC106381973	uncharacterized GPI-anchored protein At3g06035-like	-2.19063	1.30102e-22
LOC106399923	uncharacterized LOC106399923	-2.99871	1.34318e-22
LOC106394816	inositol transporter 1-like	2.42583	1.36953e-22
LOC106397655	ATP-dependent DNA helicase Q-like 1	-2.30257	1.65353e-22
LOC106354687	mechanosensitive ion channel protein 6-like	-15.1876	1.67078e-22
LOC106359414	tonoplast dicarboxylate transporter-like	6.2494	1.77922e-22
LOC106366819	mitochondrial carnitine/acylcarnitine carrier-like protein	3.22213	1.81732e-22
LOC106386627	FBD-associated F-box protein At5g18780-like	-3.76656	1.84206e-22
LOC106396206	aquaporin NIP2-1	-16.5912	1.86811e-22
LOC106451750	uncharacterized LOC106451750	16.4218	1.99817e-22
LOC106445266	auxin-responsive protein IAA16-like	1.32887	2.00996e-22
LOC106401061	glutathione S-transferase DHAR1	1.29785	2.30583e-22
LOC106444113	non-specific lipid-transfer protein 2-like	2.27512	2.65294e-22
LOC106453443	glycerol-3-phosphate 2-O-acyltransferase 6	-2.79726	3.67644e-22
LOC106354823	glutamic acid-rich protein-like	-1.74417	4.49626e-22
LOC106345698	homeobox-leucine zipper protein ATHB-7-like	5.30563	4.65717e-22
LOC106453449	pre-mRNA-splicing factor SLU7-like	2.85334	4.75106e-22
LOC106398710	aquaporin PIP2-2-like	-1.77538	4.81599e-22
LOC106376342	uncharacterized LOC106376342	7.08118	4.99456e-22
LOC106410133	peptidyl-prolyl cis-trans isomerase CYP18-3-like	2.31678	5.26829e-22
LOC106449395	3-deoxy-manno-octulosonate cytidylyltransferase	2.28307	6.65447e-22
LOC106366424	histone H1	1.75853	6.78089e-22
LOC106361246	E3 ubiquitin-protein ligase RING1-like	16.1419	6.83888e-22
LOC106381499	probable leucine-rich repeat receptor-like protein kinase At5g49770	1.60838	7.08454e-22
LOC106365670	inositol phosphorylceramide glucuronosyltransferase 1-like	-15.6462	7.34303e-22
LOC106397329	probable histone-arginine methyltransferase 1.3	-15.6585	7.37334e-22
LOC106451751	uncharacterized LOC106451751	17.2004	7.60062e-22
LOC106451303	dolichol kinase-like	1.56975	7.71674e-22
LOC106381717	uncharacterized LOC106381717	3.85226	8.25311e-22
LOC106376331	MLP-like protein 328	-4.07866	1.17324e-21
LOC106453756	4-coumarate--CoA ligase 1-like	2.28078	1.17903e-21
LOC106406711	serine/threonine-protein kinase 3-like	1.20922	1.20423e-21
LOC106416234	dehydrin Rab18-like	5.48907	1.21441e-21
LOC106445567	F-box protein PP2-A12	2.35511	1.27813e-21
LOC106454839	4-substituted benzoates-glutamate ligase GH3.12	-2.33384	1.3995e-21
LOC106451761	guanine nucleotide-binding protein-like NSN1	-15.4672	1.43099e-21
LOC106389588	peptidyl-prolyl cis-trans isomerase FKBP10-like	-1.23505	1.45729e-21
LOC106451693	probable carboxylesterase 5	2.17476	1.47876e-21
LOC106381497	wall-associated receptor kinase-like 22	-5.04303	1.58864e-21
LOC106407079	uncharacterized LOC106407079	2.51049	1.61258e-21
LOC106358502	uncharacterized LOC106358502	-9.09789	1.62865e-21
LOC106345821	epithiospecifier protein-like	1.79462	1.65941e-21
LOC106346112	thioredoxin-like protein CITRX	-16.9665	2.02397e-21
LOC106390593	protein phosphatase 2C 70-like	3.29788	2.05887e-21
LOC106410977	peroxidase 32-like	1.3216	2.42066e-21
LOC106351474	beta-amylase 5-like	3.18867	2.55802e-21
LOC106391799	zinc finger CCCH domain-containing protein 34-like	-15.5318	2.57793e-21
LOC106453262	omega-6 fatty acid desaturase	1.16694	2.61517e-21
LOC106354597	nitrate reductase [NADH]	-14.7621	2.89041e-21
LOC106386751	dolichyl-diphosphooligosaccharide--protein glycosyltransferase subunit STT3A-like	1.5657	3.74396e-21
LOC106452671	kinesin-4-like	-1.76761	4.21259e-21
LOC106387174	phototropin-2-like	-1.73634	4.3395e-21
LOC106396262	delta-1-pyrroline-5-carboxylate synthase A-like	2.0254	5.03889e-21
LOC106411903	uncharacterized LOC106411903	2.00456	5.09713e-21
LOC106367140	probable magnesium transporter NIPA8	1.87382	5.23983e-21
LOC106397480	peptidyl-prolyl cis-trans isomerase CYP21-4	-16.3395	5.51147e-21
LOC106374761	glycine-rich cell wall structural protein 1.0-like	3.31641	5.76707e-21
LOC106397590	mitogen-activated protein kinase kinase kinase 3	-1.5806	7.29534e-21
LOC106368011	uncharacterized protein At5g48480-like	1.28991	9.4575e-21
LOC106354526	pathogenesis-related protein 5-like	-8.821	1.02244e-20
LOC106347620	haloacid dehalogenase-like hydrolase domain-containing protein At3g48420	-15.8267	1.04831e-20
LOC106415500	rRNA 2'-O-methyltransferase fibrillarin-like	4.10728	1.073e-20
LOC106379209	uncharacterized LOC106379209	-6.58261	1.1986e-20
LOC106351539	serine/threonine-protein phosphatase 2A 65 kDa regulatory subunit A alpha isoform-like	-1.77684	1.22739e-20
LOC106345171	uncharacterized LOC106345171	15.6927	1.26768e-20
LOC106366033	60S ribosomal protein L13-3-like	1.55467	1.39975e-20
LOC106418461	probable galactinol--sucrose galactosyltransferase 1	3.21071	1.43805e-20
LOC106353941	uncharacterized LOC106353941	3.9713	1.64961e-20
LOC106435426	protein CYPRO4-like	1.9772	1.82243e-20
LOC106366803	WAT1-related protein At3g02690	15.511	2.03801e-20
LOC106452409	omega-6 fatty acid desaturase	1.22521	2.0625e-20
LOC106349206	UDP-arabinopyranose mutase 1-like	1.423	2.4292e-20
LOC106437679	WAT1-related protein At1g43650	2.81042	2.5634e-20
LOC106347213	uncharacterized LOC106347213	-3.09035	2.57265e-20
LOC106381760	uncharacterized LOC106381760	-17.6587	2.65548e-20
LOC106451609	E3 ubiquitin-protein ligase CCNB1IP1 homolog	1.64464	2.67515e-20
LOC106392317	translocator protein homolog	4.95981	2.78264e-20
LOC106371057	replication protein A 70 kDa DNA-binding subunit A-like	-15.0663	2.88389e-20
LOC106402795	glutamate decarboxylase 2-like	2.91581	3.17707e-20
LOC106381966	uncharacterized LOC106381966	-1.5859	3.36272e-20
LOC106388514	phenylalanine ammonia-lyase 1-like	1.84719	3.39924e-20
LOC106401769	SH3 and multiple ankyrin repeat domains protein 1-like	-2.65572	3.59116e-20
LOC106445285	probable UDP-N-acetylglucosamine--peptide N-acetylglucosaminyltransferase SEC	1.18905	3.74658e-20
LOC106371906	sugar transporter ERD6-like 16	1.31753	3.85755e-20
LOC106361411	cytochrome P450 81F1-like	-2.06557	3.89922e-20
LOC106445304	disease resistance protein TAO1-like	-1.92064	3.96628e-20
LOC106399105	uncharacterized LOC106399105	-1.70905	4.06258e-20
LOC106392053	cytochrome P450 76C4-like	1.34853	4.54975e-20
LOC106451428	disease resistance-like protein CSA1	14.0717	4.84977e-20
LOC106453007	trafficking protein particle complex subunit 6B-like	-1.93092	5.1761e-20
LOC106368836	uncharacterized LOC106368836	1.58755	5.52128e-20
LOC106440321	uncharacterized LOC106440321	-15.7855	5.89247e-20
LOC106402240	uncharacterized LOC106402240	1.20779	5.92553e-20
LOC106387282	pentatricopeptide repeat-containing protein At3g02650	-1.29804	6.02514e-20
LOC106452998	alkaline/neutral invertase C	1.73336	6.25213e-20
LOC106353656	protein TIFY 10B-like	1.39385	6.44845e-20
LOC106388330	uncharacterized LOC106388330	-15.6128	6.66811e-20
LOC106390062	gamma-glutamyl hydrolase 2-like	1.29714	7.0581e-20
LOC106406688	heat shock 70 kDa protein 5	1.63288	7.08342e-20
LOC106354666	V-type proton ATPase catalytic subunit A-like	-15.1743	7.43384e-20
LOC106451290	cytochrome b5 isoform B-like	1.74364	7.56801e-20
LOC106371977	syntaxin-21-like	3.4711	7.60192e-20
LOC106449823	uncharacterized LOC106449823	-2.91699	7.6315e-20
LOC106445318	uncharacterized LOC106445318	-16.3514	7.70561e-20
LOC106451464	protein DJ-1 homolog B-like	1.77547	7.96813e-20
LOC106389636	OPA3-like protein	-1.83585	8.1832e-20
LOC106453006	cytadherence high molecular weight protein 2-like	-14.5809	8.80148e-20
LOC106351536	uncharacterized LOC106351536	15.9307	9.0555e-20
LOC106347202	uncharacterized LOC106347202	5.00332	9.56932e-20
LOC106445305	uncharacterized LOC106445305	-1.26611	1.0042e-19
LOC106442611	uncharacterized LOC106442611	-8.41473	1.03049e-19
LOC106381549	histone acetyltransferase HAC1-like	1.16122	1.04748e-19
LOC106386139	uncharacterized LOC106386139	16.3723	1.10877e-19
LOC106403316	jacalin-related lectin 4-like	1.21758	1.15254e-19
LOC106365510	sucrose synthase 3	5.05149	1.29458e-19
LOC106374028	uncharacterized LOC106374028	-9.87997	1.34247e-19
LOC106446764	late embryogenesis abundant protein Lea5-like	1.8346	1.39344e-19
LOC106451118	serine/threonine-protein kinase KIPK-like	-1.55949	1.39578e-19
LOC106366487	uncharacterized LOC106366487	-15.0889	1.52368e-19
LOC106453011	uncharacterized LOC106453011	-15.35	1.7241e-19
LOC106437935	uncharacterized LOC106437935	-4.14065	1.77549e-19
LOC106397237	probable E3 ubiquitin ligase SUD1	-14.2319	1.79389e-19
LOC106348445	epithiospecifier protein-like	2.29946	1.91851e-19
LOC106389200	polynucleotide 3'-phosphatase ZDP-like	-1.51128	2.01809e-19
LOC106348915	peptidyl-prolyl cis-trans isomerase FKBP65-like	4.81606	2.23155e-19
LOC106396207	aquaporin NIP2-1-like	-15.792	2.45292e-19
LOC106451752	uncharacterized LOC106451752	17.1229	2.59754e-19
LOC106411192	protein NRT1/ PTR FAMILY 2.11-like	2.82459	2.60147e-19
LOC106352877	rab proteins geranylgeranyltransferase component A 2-like	-15.0075	2.69262e-19
LOC106351532	uncharacterized LOC106351532	15.6155	2.77512e-19
LOC106364685	DNA-binding protein DDB_G0278111-like	1.43306	2.79525e-19
LOC106410663	bark storage protein A-like	2.51179	2.88915e-19
LOC106388513	phenylalanine ammonia-lyase 1-like	1.80801	3.09281e-19
LOC106415479	inositol-3-phosphate synthase	2.76109	3.16144e-19
LOC106417876	uncharacterized LOC106417876	14.8368	3.17461e-19
LOC106451747	uncharacterized LOC106451747	15.0787	3.41546e-19
LOC106388887	classical arabinogalactan protein 3-like	4.13922	3.95922e-19
LOC106452336	RNA-binding protein PNO1 pseudogene	1.46304	4.17654e-19
LOC106448212	protein STRICTOSIDINE SYNTHASE-LIKE 9-like	1.46679	4.35597e-19
LOC106387147	beta-glucosidase 3-like	2.15575	4.67523e-19
LOC106392378	uncharacterized LOC106392378	15.2815	5.35511e-19
LOC106388114	uncharacterized LOC106388114	2.90167	5.70046e-19
LOC106441757	uncharacterized LOC106441757	13.8637	6.21984e-19
LOC106387748	zinc finger protein VAR3	3.09543	6.53638e-19
LOC106405564	uncharacterized LOC106405564	4.06196	6.63426e-19
LOC106355440	osmotin-like protein	-1.34066	6.66104e-19
LOC106387179	outer membrane lipoprotein Blc-like	1.47848	7.28108e-19
LOC106453499	auxin-responsive protein IAA7-like	1.61249	7.30899e-19
LOC106442742	aspartic proteinase A2	2.1569	9.07871e-19
LOC106346114	GATA transcription factor 15-like	-15.9027	9.10167e-19
LOC106359793	serine/threonine-protein kinase Aurora-1-like	-1.2158	9.35173e-19
LOC106446161	probable galactinol--sucrose galactosyltransferase 5	2.22318	9.85097e-19
LOC106431361	uncharacterized LOC106431361	1.45866	1.04403e-18
LOC106451760	desumoylating isopeptidase 1-like	-9.14829	1.05296e-18
LOC106386232	uncharacterized LOC106386232	-15.2657	1.12769e-18
LOC106451119	host cell factor-like	1.36049	1.1686e-18
LOC106347825	40S ribosomal protein S9-2	2.8053	1.17975e-18
LOC106412439	uncharacterized LOC106412439	15.1758	1.25632e-18
LOC106451656	protein LHCP TRANSLOCATION DEFECT-like	-2.52179	1.26548e-18
LOC106438967	5-methyltetrahydropteroyltriglutamate--homocysteine methyltransferase 2	1.80458	1.29826e-18
LOC106451031	uncharacterized LOC106451031	14.425	1.31174e-18
LOC106406037	cytochrome c oxidase subunit 5b-1	1.31727	1.35739e-18
LOC106362192	MLP-like protein 43	1.47022	1.44095e-18
LOC106445898	uncharacterized LOC106445898	14.4301	1.44459e-18
LOC106450724	universal stress protein A-like protein	2.80715	1.45017e-18
LOC106354680	gamma-glutamyl hydrolase 2-like	-15.3961	1.4975e-18
LOC106346082	zinc finger CCCH domain-containing protein 34-like	1.35808	1.52557e-18
LOC106368001	HAUS augmin-like complex subunit 3	-1.13537	1.6813e-18
LOC106452211	uncharacterized LOC106452211	14.8914	2.00861e-18
LOC106348442	GDSL esterase/lipase At1g54020-like	1.21068	2.11653e-18
LOC106354272	bark lectin isoform 2-like	1.15569	2.16025e-18
LOC106455070	uncharacterized LOC106455070	-15.9961	2.26824e-18
LOC106354654	uncharacterized LOC106354654	-14.8535	2.35537e-18
LOC106349208	probable tRNA (guanine(26)-N(2))-dimethyltransferase 2	14.542	2.45749e-18
LOC106357164	zinc finger protein JAGGED-like	-2.7744	2.61316e-18
LOC106395982	S-adenosylmethionine synthase 2-like	1.32816	2.80644e-18
LOC106455021	uncharacterized LOC106455021	-14.8642	3.05562e-18
LOC106453051	cell cycle checkpoint control protein RAD9A	-3.0543	3.50629e-18
LOC106365666	AT-hook motif nuclear-localized protein 14-like	-14.8596	3.51924e-18
LOC106384672	putative geranylgeranyl pyrophosphate synthase 8	-15.9757	3.59571e-18
LOC106386605	uncharacterized LOC106386605	-1.46245	3.86308e-18
LOC106389821	uncharacterized LOC106389821	3.2213	4.05697e-18
LOC106433487	uncharacterized LOC106433487	-7.82956	4.11442e-18
LOC106437916	probably inactive leucine-rich repeat receptor-like protein kinase IMK2	-1.06152	4.43848e-18
LOC106407719	uncharacterized LOC106407719	-4.66853	4.45377e-18
LOC106437664	uncharacterized LOC106437664	5.69673	4.50965e-18
LOC106369053	kinesin-like protein NACK1	-1.14713	4.69394e-18
LOC106405981	trichohyalin-like	-1.61621	4.80771e-18
LOC106397375	sodium/hydrogen exchanger 3	-2.01222	5.28959e-18
LOC106454118	uncharacterized LOC106454118	14.2675	5.31785e-18
LOC106438832	trafficking protein particle complex subunit 4-like	-2.15355	5.55076e-18
LOC106407686	uncharacterized LOC106407686	-2.19796	5.67289e-18
LOC106451281	cell division cycle 20.2	-8.18884	5.85508e-18
LOC106451871	zinc transporter ZTP29	-1.56532	5.95588e-18
LOC106397395	transcription factor bHLH148-like	-2.78582	5.9897e-18
LOC106431372	glutaredoxin-C8-like	4.51898	6.13272e-18
LOC106379665	uncharacterized LOC106379665	15.5011	6.55301e-18
LOC106346105	uncharacterized LOC106346105	-14.9406	6.80321e-18
LOC106400581	50S ribosomal protein L7/L12	-1.45858	6.81551e-18
LOC106376576	uncharacterized LOC106376576	14.2014	7.03244e-18
LOC106396863	uncharacterized LOC106396863	14.1974	7.13686e-18
LOC106410833	uncharacterized LOC106410833	2.25124	7.41204e-18
LOC106454997	uncharacterized LOC106454997	15.4658	8.67422e-18
LOC106391984	protein phosphatase 2C 3-like	2.05884	8.78421e-18
LOC106352208	probable galacturonosyltransferase 9	-1.41588	9.00657e-18
LOC106352945	huntingtin-interacting protein K-like	-16.2053	9.14145e-18
LOC106390498	glutamate--glyoxylate aminotransferase 2-like	2.25065	9.49331e-18
LOC106356201	uncharacterized LOC106356201	15.1238	9.65074e-18
LOC106346113	uncharacterized LOC106346113	-15.8684	1.04885e-17
LOC106346104	INO80 complex subunit B-like	-14.8416	1.19603e-17
LOC106377370	ferric reduction oxidase 2-like	4.18344	1.26517e-17
LOC106402927	probable ubiquitin-conjugating enzyme E2 25	2.15734	1.26883e-17
LOC106399475	uncharacterized LOC106399475	5.27307	1.29172e-17
LOC106382013	putative cell division cycle ATPase	2.83488	1.43322e-17
LOC106371066	uncharacterized LOC106371066	-1.72751	1.43775e-17
LOC106389866	uncharacterized protein At4g19900-like	1.05562	1.44003e-17
LOC106356040	thioredoxin reductase 2-like	-6.03337	1.44907e-17
LOC106390579	probable LRR receptor-like serine/threonine-protein kinase At3g47570	1.79956	1.53411e-17
LOC106402510	monothiol glutaredoxin-S15	1.95475	1.64969e-17
LOC106366369	vacuolar-sorting receptor 3-like	1.09302	1.64984e-17
LOC106357583	haloacid dehalogenase-like hydrolase domain-containing protein At3g48420	-15.0981	1.6613e-17
LOC106397788	uncharacterized LOC106397788	-15.1436	1.69131e-17
LOC106408734	probable beta-D-xylosidase 5	2.22899	1.75445e-17
LOC106391490	uncharacterized LOC106391490	14.4068	1.84443e-17
LOC106387754	F-box protein At1g11270-like	14.8161	1.92323e-17
LOC106386846	transcription factor MYB59	2.2059	2.1674e-17
LOC106385758	laccase-17-like	1.62401	2.39539e-17
LOC106368827	ubiquitin-conjugating enzyme E2 20-like	-1.13118	2.40387e-17
LOC106371943	peptidyl-tRNA hydrolase 2	4.75353	2.47068e-17
LOC106375020	uncharacterized LOC106375020	3.37619	2.4741e-17
LOC106361789	uncharacterized LOC106361789	-7.69513	2.49764e-17
LOC106446917	osmotin-like protein	-1.8331	2.76931e-17
LOC106357765	wiskott-Aldrich syndrome protein family member 2-like	15.2309	2.82823e-17
LOC106350887	uncharacterized LOC106350887	14.9952	3.06689e-17
LOC106377580	cyclin-A2-4-like	-1.95794	3.1816e-17
LOC106346103	ubiquitin-like-specific protease 1A	-14.5653	3.22699e-17
LOC106382342	uncharacterized LOC106382342	1.3547	3.4146e-17
LOC106389566	nuclear transport factor 2-like	1.19774	3.66606e-17
LOC106437784	uncharacterized LOC106437784	2.89858	3.77959e-17
LOC106382012	acyl-CoA-binding protein-like	-1.0434	4.13289e-17
LOC106354836	F-box/LRR-repeat protein 2-like	-2.55859	4.36525e-17
LOC106428787	uncharacterized LOC106428787	2.2763	4.42096e-17
LOC106382133	uncharacterized LOC106382133	-14.8141	4.50623e-17
LOC106372577	myb-related protein 3R-1-like	2.80218	4.68251e-17
LOC106397623	probable E3 ubiquitin ligase SUD1	-13.7119	5.21572e-17
LOC106372206	uncharacterized LOC106372206	-1.05083	5.55208e-17
LOC106352823	serine/threonine-protein kinase WNK2-like	-4.52192	5.72144e-17
LOC106445309	uncharacterized LOC106445309	-13.719	5.77763e-17
LOC106352924	uncharacterized LOC106352924	-14.4776	5.82693e-17
LOC106401696	probable phospholipid hydroperoxide glutathione peroxidase 6	1.05473	5.83788e-17
LOC106375987	high mobility group B protein 6-like	-1.24376	6.03906e-17
LOC106405531	uncharacterized LOC106405531	13.9734	6.1814e-17
LOC106454688	uncharacterized LOC106454688	1.87603	6.35664e-17
LOC106447977	uncharacterized LOC106447977	-14.4117	6.87427e-17
LOC106443239	adenylyl-sulfate kinase 3	1.86206	6.95004e-17
LOC106448208	protein POLLENLESS 3-LIKE 2-like	-1.0784	7.4541e-17
LOC106450731	uncharacterized LOC106450731	-15.0877	7.86723e-17
LOC106365592	glutamic acid-rich protein-like	-1.32387	8.07386e-17
LOC106415772	non-lysosomal glucosylceramidase-like	2.27982	8.34861e-17
LOC106408069	ankyrin-1-like	-3.31002	8.62561e-17
LOC106390050	protein YIPF6 homolog	2.35326	8.62692e-17
LOC106394924	uncharacterized LOC106394924	-3.59199	8.6583e-17
LOC106404001	putative F-box protein At3g17620	7.43966	8.71677e-17
LOC106356350	uncharacterized LOC106356350	-4.53637	8.93506e-17
LOC106404984	uncharacterized LOC106404984	1.96474	9.15843e-17
LOC106418133	cationic amino acid transporter 4	2.72715	9.27727e-17
LOC106400536	thioredoxin-like protein CITRX	-3.27537	9.92164e-17
LOC106368136	deSI-like protein At4g17486	-1.81357	9.94496e-17
LOC106400140	uncharacterized LOC106400140	-14.5898	1.04738e-16
LOC106390934	glutamate decarboxylase 2-like	2.53976	1.14308e-16
LOC106444819	NADH dehydrogenase [ubiquinone] iron-sulfur protein 4	1.11043	1.15459e-16
LOC106451426	uncharacterized LOC106451426	14.9577	1.28363e-16
LOC106397015	hydrophobic protein RCI2A-like	-3.2311	1.43103e-16
LOC106435447	uncharacterized LOC106435447	1.73397	1.44952e-16
LOC106412321	uncharacterized LOC106412321	3.9339	1.4943e-16
LOC106416255	inositol-3-phosphate synthase	2.61292	1.50759e-16
LOC106397086	SH3 and multiple ankyrin repeat domains protein 1-like	-3.43546	1.5673e-16
LOC106392161	alcohol dehydrogenase class-P-like	-3.28193	1.60964e-16
LOC106416537	protein TRANSPARENT TESTA 12-like	2.06123	1.63873e-16
LOC106365664	tryptophan--tRNA ligase	-15.6579	1.71394e-16
LOC106387192	diacylglycerol kinase 4	-6.91297	1.77828e-16
LOC106391520	protein IQ-DOMAIN 1-like	-1.54983	1.78111e-16
LOC106415478	inositol-3-phosphate synthase	2.76924	1.84028e-16
LOC106381856	cytochrome P450 72A15-like	1.67493	1.87775e-16
LOC106390497	protein EXORDIUM-like 4	1.35695	1.92986e-16
LOC106386922	protein RETICULATA-RELATED 1-like	1.74622	1.93104e-16
LOC106452978	probable pectate lyase 8	1.04538	2.16432e-16
LOC106402124	60S ribosomal protein L18-2-like	-4.25383	2.19514e-16
LOC106354205	uncharacterized LOC106354205	3.75046	2.21054e-16
LOC106348746	glyoxysomal fatty acid beta-oxidation multifunctional protein MFP-a-like	1.76493	3.03008e-16
LOC106401995	uncharacterized LOC106401995	1.3828	3.26764e-16
LOC106349057	probably inactive leucine-rich repeat receptor-like protein kinase IMK2	-1.03333	3.31642e-16
LOC106415492	protein RRP5 homolog	1.496	3.38915e-16
LOC106375394	early nodulin-like protein 1	-1.12431	3.41314e-16
LOC106447366	histone H4	-1.21892	3.45669e-16
LOC106362663	uncharacterized LOC106362663	1.53701	3.73513e-16
LOC106397170	60S ribosomal protein L22-2-like	-1.36122	3.89385e-16
LOC106352799	uncharacterized LOC106352799	-15.8079	3.90882e-16
LOC106354688	B-box zinc finger protein 22-like	-14.7211	4.25555e-16
LOC106379367	uncharacterized LOC106379367	-4.81866	4.53536e-16
LOC106348513	early nodulin-like protein 3	-1.34687	4.62864e-16
LOC106365836	uncharacterized LOC106365836	5.71164	4.76301e-16
LOC106389547	uncharacterized LOC106389547	8.7199	4.92457e-16
LOC106418205	uncharacterized LOC106418205	15.1376	5.2773e-16
LOC106382212	probable protein phosphatase 2C 34	1.67141	5.92358e-16
LOC106409056	wound-induced basic protein-like	-1.54718	6.36129e-16
LOC106380448	uncharacterized LOC106380448	1.24753	6.55949e-16
LOC106387139	E3 ubiquitin-protein ligase RNF8-like	2.25857	7.31644e-16
LOC106415125	separase-like	-1.52549	7.61313e-16
LOC106345162	uncharacterized LOC106345162	14.9824	7.66909e-16
LOC106417713	adenylyl-sulfate kinase 3-like	3.41285	8.49572e-16
LOC106438973	glyceraldehyde-3-phosphate dehydrogenase	-2.36507	8.50322e-16
LOC106375631	REF/SRPP-like protein At1g67360	1.34707	8.57869e-16
LOC106366484	uncharacterized LOC106366484	1.21187	8.71381e-16
LOC106377300	uncharacterized LOC106377300	-14.0058	9.21032e-16
LOC106349123	uncharacterized LOC106349123	3.64378	9.62651e-16
LOC106397314	elongation of fatty acids protein 3-like	-3.30477	1.03842e-15
LOC106366485	putative cell division cycle ATPase	3.93756	1.08992e-15
LOC106388019	uncharacterized LOC106388019	2.35169	1.09542e-15
LOC106353244	protein STRICTOSIDINE SYNTHASE-LIKE 9-like	1.49367	1.15419e-15
LOC106438241	axial regulator YABBY 1-like	-2.25483	1.21122e-15
LOC106400948	sucrose transport protein SUC2-like	1.80151	1.22097e-15
LOC106411009	mitotic apparatus protein p62-like	-1.13005	1.32739e-15
LOC106367429	protein NRT1/ PTR FAMILY 4.4-like	1.24668	1.34039e-15
LOC106364782	uncharacterized LOC106364782	-15.1104	1.40013e-15
LOC106395476	subtilisin-like protease SBT3.3	1.62257	1.42644e-15
LOC106451410	probable WRKY transcription factor 21	-1.70626	1.48031e-15
LOC106397227	60S ribosomal protein L22-2-like	-1.86726	1.48042e-15
LOC106369660	60S ribosomal protein L35-1	1.39518	1.56204e-15
LOC106440568	uncharacterized LOC106440568	-16.0883	1.61098e-15
LOC106350186	uncharacterized LOC106350186	14.9698	1.87804e-15
LOC106382107	glycine-rich RNA-binding protein RZ1A-like	1.75482	1.94291e-15
LOC106431344	putative F-box protein At3g23420	4.02243	1.99113e-15
LOC106399724	L-Ala-D/L-amino acid epimerase-like	-14.9934	1.99555e-15
LOC106368004	formin-like protein 9	-1.02065	2.00005e-15
LOC106448143	uncharacterized LOC106448143	-14.2153	2.10394e-15
LOC106349106	uncharacterized protein At1g04910-like	-1.33273	2.16998e-15
LOC106415967	dehydrin Rab18-like	4.98499	2.18226e-15
LOC106397104	uncharacterized LOC106397104	-1.7846	2.19072e-15
LOC106379694	uncharacterized LOC106379694	2.41918	2.31577e-15
LOC106451749	pinoresinol reductase 1	2.36154	2.45172e-15
LOC106453035	uncharacterized LOC106453035	-14.75	2.61232e-15
LOC106454977	ABC transporter G family member 24-like	-7.28815	2.89561e-15
LOC106438342	histone H2B.3-like	-1.09787	2.95619e-15
LOC106386265	uncharacterized LOC106386265	15.2786	3.18811e-15
LOC106439511	uncharacterized LOC106439511	3.36694	3.23084e-15
LOC106386574	anamorsin homolog	1.30415	3.33629e-15
LOC106390373	protein DA1-related 5-like	1.1246	3.35676e-15
LOC106372178	vegetative cell wall protein gp1-like	1.00434	3.46965e-15
LOC106445282	uncharacterized LOC106445282	1.04903	3.48483e-15
LOC106389134	GDSL esterase/lipase At3g53100-like	1.2495	3.6947e-15
LOC106354470	mental retardation GTPase activating protein homolog 4-like	-2.82935	3.70729e-15
LOC106364166	uncharacterized LOC106364166	13.8059	3.70904e-15
LOC106357342	60S ribosomal protein L30-2	-15.5935	4.04468e-15
LOC106384828	U-box domain-containing protein 56-like	3.79285	4.37845e-15
LOC106439040	serine/threonine-protein kinase TIO	-1.04278	4.38065e-15
LOC106450450	S-adenosylmethionine synthase 2-like	1.38214	4.43548e-15
LOC106453059	gibberellin receptor GID1A	1.48256	4.57541e-15
LOC106443234	uncharacterized LOC106443234	13.7357	4.63184e-15
LOC106451759	uncharacterized vacuolar membrane protein YML018C-like	-14.4088	4.88876e-15
LOC106443196	uncharacterized LOC106443196	-1.43076	5.07078e-15
LOC106401596	thymidine kinase-like	1.97903	5.22633e-15
LOC106389631	uncharacterized LOC106389631	-13.8681	5.28017e-15
LOC106451056	protein RETICULATA-like	1.01023	5.30187e-15
LOC106397764	uncharacterized LOC106397764	-2.80708	5.69863e-15
LOC106354755	glycerol-3-phosphate 2-O-acyltransferase 6-like	-2.51557	5.7427e-15
LOC106389568	non-specific lipid transfer protein GPI-anchored 1-like	-1.34715	6.09876e-15
LOC106381875	bax inhibitor 1	1.75022	6.11356e-15
LOC106443741	tropomyosin-2-like	-1.72212	6.1325e-15
LOC106395146	late embryogenesis abundant protein Lea5-like	4.70767	6.39151e-15
LOC106401336	GDSL esterase/lipase At3g53100	1.09921	6.50235e-15
LOC106402858	developmentally-regulated G-protein 2	1.77835	6.51253e-15
LOC106451455	cyclin-B2-2-like	-1.22176	6.59719e-15
LOC106399485	uncharacterized LOC106399485	8.52814	6.93882e-15
LOC106397137	guanylate kinase 3	-1.83631	7.00791e-15
LOC106354660	pyrophosphate-energized membrane proton pump 2	-3.01411	7.0165e-15
LOC106354430	altered inheritance of mitochondria protein 21-like	-1.46663	7.03262e-15
LOC106392254	YTH domain-containing protein 1-like	-1.33412	7.15318e-15
LOC106452374	uncharacterized LOC106452374	5.11071	7.15332e-15
LOC106377834	lipoxygenase 2	2.95377	7.1843e-15
LOC106433437	putative ankyrin repeat protein RF_0381	-13.8051	7.24771e-15
LOC106397249	uncharacterized LOC106397249	-1.23247	7.39064e-15
LOC106413949	18 kDa seed maturation protein-like	3.6276	7.77739e-15
LOC106368735	protein CYPRO4-like	-1.29607	7.78996e-15
LOC106383903	IRK-interacting protein-like	1.98219	7.84488e-15
LOC106381389	uncharacterized LOC106381389	14.4811	8.00855e-15
LOC106371907	sugar transporter ERD6-like 16	1.5419	8.16728e-15
LOC106345366	uncharacterized LOC106345366	1.85512	8.37282e-15
LOC106354344	chaperone protein ClpB1	2.59909	8.44804e-15
LOC106454642	uncharacterized protein At5g01610-like	2.09074	8.52308e-15
LOC106453031	DNA excision repair protein ERCC-1	-1.5818	8.73881e-15
LOC106444271	methylthioalkylmalate synthase 2	2.36199	8.91389e-15
LOC106452343	putative DUF21 domain-containing protein At3g13070	2.19927	8.99627e-15
LOC106348419	NEDD8-conjugating enzyme Ubc12-like	-14.8311	9.16634e-15
LOC106349269	uncharacterized LOC106349269	2.76519	9.28396e-15
LOC106452996	rab proteins geranylgeranyltransferase component A 2-like	1.0405	9.31412e-15
LOC106397390	long chain acyl-CoA synthetase 6	-13.3903	9.49103e-15
LOC106384356	cycloartenol-C-24-methyltransferase-like	-2.39619	9.53274e-15
LOC106347720	annexin D1-like	1.10792	9.63451e-15
LOC106360790	rop guanine nucleotide exchange factor 6	-1.33352	9.7902e-15
LOC106451512	tubulin beta-7 chain	-1.0029	9.80643e-15
LOC106384810	NADPH--cytochrome P450 reductase 2-like	-13.3767	1.01563e-14
LOC106445723	checkpoint protein hus1-like	-1.82833	1.02002e-14
LOC106415107	low-temperature-induced 65 kDa protein-like	2.07417	1.12373e-14
LOC106386140	uncharacterized LOC106386140	13.9219	1.17114e-14
LOC106454439	mitochondrial inner membrane protease ATP23	-14.7319	1.20014e-14
LOC106398506	acanthoscurrin-1-like	-1.36883	1.23128e-14
LOC106402735	protein PHR1-LIKE 1-like	1.62579	1.2566e-14
LOC106440358	uncharacterized LOC106440358	1.40737	1.28063e-14
LOC106390252	protein YLS3-like	1.32054	1.39559e-14
LOC106354658	amyrin synthase LUP2	-13.2153	1.42741e-14
LOC106452069	ethylene-responsive transcription factor RAP2-3-like	1.88606	1.45776e-14
LOC106403668	receptor-like protein kinase HSL1	1.42292	1.56634e-14
LOC106380594	peroxisomal (S)-2-hydroxy-acid oxidase GLO3-like	-14.6422	1.64716e-14
LOC106450535	dehydrogenase/reductase SDR family member 7-like	2.09293	1.69602e-14
LOC106345990	putative lipid-transfer protein DIR1	3.16074	1.78209e-14
LOC106386882	L-type lectin-domain containing receptor kinase I.9-like	-1.6277	1.80085e-14
LOC106367399	cold-regulated 413 inner membrane protein 2	1.67127	1.81988e-14
LOC106388886	putative clathrin assembly protein At4g40080	2.10394	2.00797e-14
LOC106360175	L-Ala-D/L-amino acid epimerase-like	-14.7865	2.1051e-14
LOC106449400	uncharacterized LOC106449400	-14.2197	2.16103e-14
LOC106452089	dihydrolipoyl dehydrogenase 2	1.08901	2.21012e-14
LOC106382604	uncharacterized LOC106382604	1.36769	2.40868e-14
LOC106390499	ras-related protein RABF2a	1.82226	2.46469e-14
LOC106453054	GDSL esterase/lipase At3g05180-like	1.29779	2.50724e-14
LOC106399511	WAT1-related protein At3g30340-like	3.06575	2.52588e-14
LOC106386767	uncharacterized LOC106386767	-1.51211	2.5322e-14
LOC106391653	uncharacterized LOC106391653	13.4404	2.62097e-14
LOC106354677	F-box/LRR-repeat protein 13-like	-13.9046	2.64258e-14
LOC106438206	uncharacterized LOC106438206	1.3396	2.71366e-14
LOC106366875	homeobox-leucine zipper protein PROTODERMAL FACTOR 2	-1.5033	2.87074e-14
LOC106366852	kinesin-5-like	-1.38986	2.87704e-14
LOC106364664	uncharacterized LOC106364664	14.0399	2.92585e-14
LOC106347721	probable LRR receptor-like serine/threonine-protein kinase At4g08850	-1.58751	2.99196e-14
LOC106449553	dof zinc finger protein DOF3.1-like	1.48597	3.35936e-14
LOC106391500	phenylalanine ammonia-lyase 1	1.94075	3.40422e-14
LOC106453005	probable protein S-acyltransferase 17	-14.1136	3.46613e-14
LOC106384082	myrosinase-like	1.23343	3.47927e-14
LOC106360589	lectin-like protein At5g03350	2.76189	3.57003e-14
LOC106407136	peptide methionine sulfoxide reductase B5-like	1.02998	3.60393e-14
LOC106384719	NAC domain-containing protein 89-like	1.91935	3.69817e-14
LOC106415084	uncharacterized LOC106415084	-2.65636	4.10579e-14
LOC106350390	uncharacterized LOC106350390	-1.55273	4.1355e-14
LOC106390969	uncharacterized LOC106390969	1.34302	4.30445e-14
LOC106445716	beta-D-glucopyranosyl abscisate beta-glucosidase-like	-1.05654	4.36208e-14
LOC106367635	50S ribosomal protein HLP	14.6297	4.47945e-14
LOC106386752	subtilisin-like protease SBT6.1	1.04181	4.70781e-14
LOC106454823	uncharacterized LOC106454823	-1.917	4.79488e-14
LOC106371939	probable arabinosyltransferase ARAD1	3.00514	4.85404e-14
LOC106368455	protein TPX2-like	-2.12054	5.18514e-14
LOC106445135	uncharacterized LOC106445135	14.2341	5.56753e-14
LOC106366815	cyclin-B1-2-like	14.5831	5.71205e-14
LOC106400938	probable pectinesterase 68	-1.64347	5.81394e-14
LOC106397783	uncharacterized LOC106397783	-2.69699	6.08321e-14
LOC106394995	uncharacterized LOC106394995	-14.7377	6.24371e-14
LOC106387419	ubiquitin-conjugating enzyme E2 30-like	1.62376	6.32649e-14
LOC106382553	uncharacterized LOC106382553	-7.21393	6.3971e-14
LOC106405910	uncharacterized LOC106405910	-2.00637	6.46021e-14
LOC106371482	GATA transcription factor 21-like	-3.67573	6.52425e-14
LOC106449800	probable aldo-keto reductase 6	3.78602	6.6719e-14
LOC106349207	pentatricopeptide repeat-containing protein At3g02330-like	12.6336	6.89698e-14
LOC106437933	uncharacterized LOC106437933	-6.18597	7.06912e-14
LOC106357147	uncharacterized GPI-anchored protein At1g61900-like	-1.04582	7.32427e-14
LOC106366744	MOB kinase activator-like 1A	-1.35141	7.5187e-14
LOC106428494	uncharacterized protein At3g28850-like	-1.22943	7.68585e-14
LOC106392105	uncharacterized LOC106392105	13.6096	7.7249e-14
LOC106397326	protein TPX2-like	-1.18296	7.78762e-14
LOC106351533	uncharacterized LOC106351533	14.8256	7.86724e-14
LOC106347075	CO(2)-response secreted protease-like	1.19421	7.97352e-14
LOC106366022	kinesin-like protein KIF3C	-1.39324	8.03763e-14
LOC106354568	synaptonemal complex protein 1-like	-5.08427	8.085e-14
LOC106368706	inositol-3-phosphate synthase-like	1.92236	8.17057e-14
LOC106368756	alpha-aminoadipic semialdehyde synthase-like	1.11019	8.40766e-14
LOC106446073	peptide methionine sulfoxide reductase A2	-2.95271	8.44564e-14
LOC106411786	peroxidase 66	1.3683	8.48654e-14
LOC106355063	thioredoxin reductase 2-like	-5.37023	8.622e-14
LOC106363247	zinc finger BED domain-containing protein RICESLEEPER 2-like	-13.391	8.77682e-14
LOC106387749	zinc finger protein VAR3	1.98504	9.09304e-14
LOC106391720	spermine synthase	1.26159	9.37534e-14
LOC106346903	kinesin-like protein NACK1	-1.20958	9.45888e-14
LOC106349549	trichohyalin-like	-1.41531	9.83055e-14
LOC106379882	uncharacterized LOC106379882	-1.42764	9.8516e-14
LOC106371093	protein NRT1/ PTR FAMILY 5.12-like	2.0663	1.00728e-13
LOC106371716	uncharacterized LOC106371716	2.00199	1.01249e-13
LOC106367397	protein MEI2-like 5	1.03135	1.08388e-13
LOC106401438	uncharacterized LOC106401438	-1.51539	1.08449e-13
LOC106347696	putative phosphatidylglycerol/phosphatidylinositol transfer protein DDB_G0282179	1.14013	1.13138e-13
LOC106412054	homeobox-leucine zipper protein ATHB-12-like	2.34463	1.17675e-13
LOC106452296	uncharacterized LOC106452296	1.12338	1.18718e-13
LOC106397621	uncharacterized LOC106397621	14.0145	1.18784e-13
LOC106366339	calcium-dependent protein kinase 28-like	1.636	1.20284e-13
LOC106376950	subtilisin-like protease SBT3.3	1.41076	1.20712e-13
LOC106390073	U-box domain-containing protein 56-like	3.99617	1.20815e-13
LOC106377301	uncharacterized LOC106377301	-7.4255	1.27636e-13
LOC106369174	abnormal spindle-like microcephaly-associated protein homolog	-1.11795	1.27923e-13
LOC106367178	uncharacterized LOC106367178	-1.19217	1.42434e-13
LOC106451042	xylosyltransferase 1-like	1.17281	1.43866e-13
LOC106386836	histone H4-like	-1.23208	1.45235e-13
LOC106346324	syntaxin-related protein KNOLLE-like	-1.10544	1.57997e-13
LOC106361643	protein NRT1/ PTR FAMILY 7.3-like	2.06694	1.61666e-13
LOC106381778	uncharacterized LOC106381778	-13.4109	1.65573e-13
LOC106359624	uncharacterized LOC106359624	-14.7127	1.79707e-13
LOC106353931	probable plastidic glucose transporter 2	1.30711	1.82233e-13
LOC106410647	dehydration-responsive protein RD22-like	1.28841	1.83591e-13
LOC106356425	cyclin-dependent kinase B2-2	-1.25604	1.93545e-13
LOC106451753	pinoresinol reductase 1	2.09868	1.96582e-13
LOC106423976	thaumatin-like protein	1.92455	1.98232e-13
LOC106446049	18 kDa seed maturation protein-like	14.3965	2.01169e-13
LOC106352325	WAT1-related protein At3g30340-like	3.80395	2.15814e-13
LOC106387868	trans-cinnamate 4-monooxygenase-like	1.33941	2.18708e-13
LOC106394709	uncharacterized LOC106394709	13.407	2.22531e-13
LOC106369953	uncharacterized LOC106369953	-11.7328	2.24339e-13
LOC106438778	V-type proton ATPase catalytic subunit A-like	-14.1002	2.28243e-13
LOC106399101	serine/threonine-protein phosphatase 4 regulatory subunit 3-like	-8.02284	2.29992e-13
LOC106352295	protein POLLENLESS 3-LIKE 2-like	-1.3636	2.34347e-13
LOC106396682	uncharacterized LOC106396682	1.22259	2.36351e-13
LOC106348778	GRF1-interacting factor 1-like	-1.08048	2.41293e-13
LOC106415012	alpha-glucan water dikinase 1	1.1763	2.55271e-13
LOC106392102	uncharacterized LOC106392102	13.44	2.63858e-13
LOC106396192	protein YLS3-like	1.57054	2.67487e-13
LOC106401266	uncharacterized LOC106401266	-13.1591	2.73587e-13
LOC106372449	protein ASPARTIC PROTEASE IN GUARD CELL 2-like	1.71321	2.73618e-13
LOC106391128	non-specific phospholipase C1	1.24673	2.79668e-13
LOC106400681	homeobox-leucine zipper protein MERISTEM L1	-1.23718	2.83535e-13
LOC106387178	outer membrane lipoprotein Blc-like	1.07123	2.84543e-13
LOC106382631	homeobox protein knotted-1-like 3	1.38202	2.90333e-13
LOC106375651	isoflavone reductase homolog P3-like	1.99325	3.08471e-13
LOC106420416	uncharacterized LOC106420416	-13.8141	3.2771e-13
LOC106349373	30S ribosomal protein S6 alpha	-1.42505	3.35117e-13
LOC106451409	histone H1.2-like	-1.18111	3.43881e-13
LOC106354549	mechanosensitive ion channel protein 6-like	1.13662	3.45867e-13
LOC106387409	oligopeptide transporter 1-like	2.87415	3.46379e-13
LOC106370718	phosphatidylinositol N-acetylglucosaminyltransferase gpi3 subunit-like	1.81197	3.56585e-13
LOC106416719	uncharacterized LOC106416719	-1.10272	3.72798e-13
LOC106400930	BTB/POZ and MATH domain-containing protein 2-like	-1.11266	3.76605e-13
LOC106446051	uncharacterized LOC106446051	-1.62904	3.80312e-13
LOC106451327	heat shock 70 kDa protein 8-like	1.22434	3.8537e-13
LOC106370507	ADP-ribosylation factor-like	4.04878	3.86056e-13
LOC106366629	zinc finger BED domain-containing protein RICESLEEPER 1-like	13.3408	3.88456e-13
LOC106445474	histone H2A variant 1	-1.06303	3.97925e-13
LOC106406019	vacuolar cation/proton exchanger 1	1.36833	4.00368e-13
LOC106453648	disease resistance protein LAZ5-like	13.0912	4.1812e-13
LOC106367018	agamous-like MADS-box protein AGL14	2.96483	4.19143e-13
LOC106360716	probable leucine-rich repeat receptor-like protein kinase IMK3	-1.18766	4.39259e-13
LOC106443300	aldehyde dehydrogenase family 7 member A1	1.18326	4.4589e-13
LOC106453022	DNA ligase 1-like	-13.1361	4.49702e-13
LOC106445745	kinesin-like protein KIF22-A	-1.02181	4.62693e-13
LOC106450917	myosin-7-like	1.42173	4.66411e-13
LOC106394994	chaperone protein DnaJ-like	1.98784	4.88968e-13
LOC106433386	protein HASTY 1-like	-9.13547	4.92738e-13
LOC106382132	uncharacterized LOC106382132	-13.666	5.07175e-13
LOC106453030	alpha-dioxygenase 1	-10.2082	5.2348e-13
LOC106402296	syntaxin-43	-1.60934	5.35617e-13
LOC106423327	cyclin-dependent kinase B2-2	-1.25842	5.38125e-13
LOC106393595	glycine-rich RNA-binding protein 2	-14.9325	5.38216e-13
LOC106368738	peroxidase 47-like	2.76277	5.6107e-13
LOC106387278	WAT1-related protein At3g02690	-1.39338	5.64528e-13
LOC106347867	uncharacterized LOC106347867	1.45304	5.72006e-13
LOC106354681	probable gamma-glutamyl hydrolase 3	-13.8967	5.72264e-13
LOC106348300	uncharacterized LOC106348300	13.8502	5.75348e-13
LOC106367021	protein TPX2	-1.68119	5.76087e-13
LOC106438833	E3 ubiquitin-protein ligase PRT6-like	-1.02698	6.4931e-13
LOC106411378	uncharacterized LOC106411378	3.58701	6.51503e-13
LOC106361386	cinnamyl alcohol dehydrogenase 7-like	-1.08492	6.9085e-13
LOC106440504	uncharacterized LOC106440504	4.29472	7.06463e-13
LOC106391865	uncharacterized LOC106391865	1.26522	7.11304e-13
LOC106384839	E3 ubiquitin-protein ligase RHF2A-like	1.11235	7.12424e-13
LOC106380401	putative lactoylglutathione lyase	2.83291	7.12893e-13
LOC106397664	aspartate carbamoyltransferase	13.289	7.4063e-13
LOC106402021	hsp70-Hsp90 organizing protein 3	1.81275	7.517e-13
LOC106352200	uncharacterized LOC106352200	3.31493	8.34071e-13
LOC106397196	probable cysteine proteinase At4g11310	2.02708	8.45185e-13
LOC106397794	uncharacterized LOC106397794	-1.45977	8.80558e-13
LOC106347119	uncharacterized LOC106347119	-1.84665	9.34633e-13
LOC106418041	uncharacterized LOC106418041	2.79046	9.43241e-13
LOC106399657	glutathione S-transferase T3-like	8.52517	9.43745e-13
LOC106401886	protein trichome birefringence-like 10	-1.3622	9.48444e-13
LOC106383282	probable protein phosphatase 2C 69	1.07053	9.57062e-13
LOC106443199	uncharacterized LOC106443199	-2.22966	9.62786e-13
LOC106387189	shikimate O-hydroxycinnamoyltransferase-like	1.90489	9.70541e-13
LOC106349172	cytochrome P450 72A13-like	1.22818	9.73789e-13
LOC106400572	alkaline/neutral invertase C	-1.57068	9.92718e-13
LOC106388769	MATH domain and coiled-coil domain-containing protein At3g58340-like	2.2502	1.01422e-12
LOC106386583	inositol phosphorylceramide glucuronosyltransferase 1-like	1.77693	1.05204e-12
LOC106452107	late embryogenesis abundant protein	13.6115	1.15294e-12
LOC106427757	cyclin-B1-2-like	-1.04672	1.17107e-12
LOC106348037	uncharacterized LOC106348037	1.28357	1.17607e-12
LOC106385516	uncharacterized LOC106385516	-2.54812	1.18424e-12
LOC106410859	uncharacterized LOC106410859	1.5853	1.22715e-12
LOC106450249	non-specific lipid-transfer protein 1-like	5.04399	1.23141e-12
LOC106348818	65-kDa microtubule-associated protein 3-like	-1.24257	1.30055e-12
LOC106409244	uncharacterized LOC106409244	-14.0454	1.32339e-12
LOC106451798	histidine biosynthesis bifunctional protein hisIE	1.3694	1.33216e-12
LOC106410448	DJ-1 protein homolog F	1.07852	1.36376e-12
LOC106367848	uncharacterized LOC106367848	-1.10049	1.37993e-12
LOC106366041	bidirectional sugar transporter SWEET12	6.42254	1.42482e-12
LOC106354381	chaperone protein ClpB1-like	1.88131	1.43261e-12
LOC106366161	protein NRT1/ PTR FAMILY 2.11-like	2.11392	1.44284e-12
LOC106375889	uncharacterized LOC106375889	-1.18297	1.47037e-12
LOC106415036	histone H2A variant 1-like	-1.19004	1.47908e-12
LOC106409074	uncharacterized LOC106409074	13.8259	1.51767e-12
LOC106369164	peroxidase 42	1.07538	1.53397e-12
LOC106380447	uncharacterized LOC106380447	-1.13161	1.58586e-12
LOC106412396	uncharacterized LOC106412396	2.88988	1.59638e-12
LOC106389879	vacuolar protein sorting-associated protein 2 homolog 2-like	-1.0015	1.63355e-12
LOC106406285	tocopherol O-methyltransferase	1.05501	1.66305e-12
LOC106371447	phenylalanine ammonia-lyase 2-like	1.41839	1.71048e-12
LOC106385597	uncharacterized LOC106385597	-1.66827	1.7164e-12
LOC106418413	metal-nicotianamine transporter YSL3-like	1.2479	1.75847e-12
LOC106397404	uncharacterized LOC106397404	-1.35798	1.78181e-12
LOC106452994	CAS1 domain-containing protein 1-like	1.06351	1.7848e-12
LOC106418575	bax inhibitor 1-like	1.09114	1.86055e-12
LOC106382134	uncharacterized LOC106382134	-8.79102	1.87311e-12
LOC106445298	disease resistance protein TAO1-like	-3.12946	1.88102e-12
LOC106404184	probable tRNA (guanine(26)-N(2))-dimethyltransferase 2	-1.53578	2.00048e-12
LOC106441125	transcription factor MYB59-like	3.25457	2.1083e-12
LOC106411879	adenine phosphoribosyltransferase 2	1.24507	2.19531e-12
LOC106363248	zinc finger BED domain-containing protein RICESLEEPER 2-like	-12.8355	2.20137e-12
LOC106446933	tubulin beta-7 chain-like	-1.02146	2.29517e-12
LOC106366019	S-type anion channel SLAH3-like	2.50372	2.40676e-12
LOC106409325	uncharacterized LOC106409325	-13.2734	2.40824e-12
LOC106396486	pyruvate dehydrogenase E1 component subunit alpha-1	-2.28976	2.47041e-12
LOC106366124	uncharacterized LOC106366124	1.3535	2.53503e-12
LOC106452359	uncharacterized LOC106452359	13.908	2.55011e-12
LOC106354204	uncharacterized LOC106354204	3.19992	2.55154e-12
LOC106383923	glycine-rich protein DOT1-like	2.00425	2.60255e-12
LOC106400977	transcription factor TCP4-like	-2.18752	2.66641e-12
LOC106401232	probable inactive serine/threonine-protein kinase fnkC	1.40497	2.74167e-12
LOC106437396	uncharacterized LOC106437396	-3.10908	2.81852e-12
LOC106348751	proline-rich antigen homolog	1.84246	2.83263e-12
LOC106380449	uncharacterized LOC106380449	1.43869	2.86373e-12
LOC106447193	probable ubiquitin-conjugating enzyme E2 24	1.67989	2.90108e-12
LOC106402547	lectin-like protein At3g16530	1.73989	2.90437e-12
LOC106387185	uncharacterized LOC106387185	1.38321	2.94833e-12
LOC106441213	peroxiredoxin-2B-like	1.01608	3.0199e-12
LOC106400096	probable beta-D-xylosidase 7	1.36173	3.08605e-12
LOC106382855	signal peptide peptidase-like	1.53313	3.11644e-12
LOC106364488	uncharacterized LOC106364488	12.9904	3.24759e-12
LOC106385833	thiol protease aleurain-like	1.17618	3.25184e-12
LOC106409008	uncharacterized LOC106409008	1.22719	3.26848e-12
LOC106382487	thaumatin-like protein 1b	2.49267	3.28846e-12
LOC106362628	zinc finger BED domain-containing protein DAYSLEEPER-like	-1.14777	3.30243e-12
LOC106345635	bifunctional L-3-cyanoalanine synthase/cysteine synthase D1-like	-1.72393	3.35123e-12
LOC106375903	uncharacterized LOC106375903	-4.34251	3.41339e-12
LOC106380476	probable phospholipid hydroperoxide glutathione peroxidase 6	1.37303	3.53524e-12
LOC106411208	protein ODORANT1-like	2.04269	3.54321e-12
LOC106354188	ABC transporter G family member 25	1.3434	3.65991e-12
LOC106415202	syntaxin-related protein KNOLLE-like	-1.18799	3.67424e-12
LOC106386867	histone H2B.3-like	-1.20353	3.75079e-12
LOC106372627	laccase-11-like	2.61668	3.81527e-12
LOC106376249	1-aminocyclopropane-1-carboxylate oxidase 3	1.72446	3.87854e-12
LOC106352748	probable protein phosphatase 2C 35	-8.13086	3.97307e-12
LOC106407726	protein PAIR1-like	-1.13938	3.99314e-12
LOC106383800	uncharacterized LOC106383800	2.86079	4.03835e-12
LOC106377568	dnaJ homolog subfamily B member 8-like	1.39097	4.08389e-12
LOC106346912	kinesin-like protein KIF19	-1.23966	4.0849e-12
LOC106413887	mitotic spindle checkpoint protein MAD2	-1.06686	4.10132e-12
LOC106383119	sulfate transporter 2.1	2.05869	4.25994e-12
LOC106387286	mannose-6-phosphate isomerase 1-like	-1.39537	4.28625e-12
LOC106382686	uncharacterized LOC106382686	1.97084	4.35488e-12
LOC106374298	rac-like GTP-binding protein ARAC7	-1.05484	4.41055e-12
LOC106357187	protein CRABS CLAW	-2.14006	4.55292e-12
LOC106346292	serine/arginine-rich splicing factor SR30-like	1.15066	4.57393e-12
LOC106351890	uncharacterized LOC106351890	15.0988	4.64557e-12
LOC106354690	NADH kinase-like	-13.3862	4.8358e-12
LOC106361026	uncharacterized LOC106361026	-1.73901	4.84216e-12
LOC106452765	uncharacterized LOC106452765	-1.09923	4.8864e-12
LOC106374568	putative glycine-rich cell wall structural protein 1	2.78032	4.92886e-12
LOC106388773	MATH domain and coiled-coil domain-containing protein At3g58340-like	2.03933	5.01966e-12
LOC106453004	uncharacterized LOC106453004	-8.86102	5.0537e-12
LOC106382178	alpha-glucan phosphorylase 1-like	1.38895	5.06478e-12
LOC106365923	protein PHLOEM PROTEIN 2-LIKE A1-like	2.56539	5.11685e-12
LOC106427158	uncharacterized LOC106427158	-2.60007	5.15146e-12
LOC106385257	uncharacterized LOC106385257	-14.6569	5.1567e-12
LOC106381781	uncharacterized LOC106381781	6.97394	5.21541e-12
LOC106455056	homocysteine S-methyltransferase 3	13.4388	5.23006e-12
LOC106441218	microsomal glutathione S-transferase 3-like	1.16294	5.33751e-12
LOC106410494	glycine-rich cell wall structural protein 2-like	4.35215	5.35742e-12
LOC106429334	peptide methionine sulfoxide reductase A3-like	-7.27795	5.43282e-12
LOC106350298	uncharacterized LOC106350298	-3.61176	5.54705e-12
LOC106351103	transcription factor bHLH148-like	1.36136	5.55245e-12
LOC106410763	replication factor C subunit 2-like	-1.49898	5.76234e-12
LOC106352619	uncharacterized LOC106352619	-14.2313	5.86288e-12
LOC106379084	uncharacterized LOC106379084	-1.25384	6.04079e-12
LOC106367209	cinnamoyl-CoA reductase 2-like	1.4759	6.24551e-12
LOC106398102	probable aquaporin PIP1-5	1.36618	6.28784e-12
LOC106395114	MLP-like protein 31	1.14156	6.36405e-12
LOC106451636	IAA-amino acid hydrolase ILR1-like 4	1.39234	6.37215e-12
LOC106387357	probable 125 kDa kinesin-related protein	-1.15999	6.37423e-12
LOC106397578	axial regulator YABBY 3	-1.88359	6.85887e-12
LOC106359474	uncharacterized LOC106359474	-14.6093	6.87096e-12
LOC106407696	uncharacterized LOC106407696	-1.49853	7.29421e-12
LOC106414640	subtilisin-like protease SBT1.6	2.86858	7.39466e-12
LOC106359162	sinapine esterase-like	-2.47983	7.74461e-12
LOC106371173	uncharacterized LOC106371173	-7.15114	7.74949e-12
LOC106367372	60S ribosomal protein L18a-like protein	1.20429	7.91985e-12
LOC106442054	uncharacterized protein At5g02240-like	-1.25466	8.1684e-12
LOC106371451	phenylalanine ammonia-lyase 2-like	1.27567	8.22548e-12
LOC106409547	basic leucine zipper 43-like	-2.99867	8.39884e-12
LOC106443584	protein YLS3-like	-1.36568	8.82167e-12
LOC106391936	axial regulator YABBY 1-like	-1.89583	8.85775e-12
LOC106384654	5'-methylthioadenosine/S-adenosylhomocysteine nucleosidase-like	2.39638	8.86543e-12
LOC106386247	uncharacterized LOC106386247	-4.21052	8.99701e-12
LOC106367843	phosphoglucan phosphatase DSP4	1.20675	9.00923e-12
LOC106387284	delta(7)-sterol-C5(6)-desaturase 1-like	-1.17372	9.08626e-12
LOC106403074	protein TPX2-like	-1.1991	9.13084e-12
LOC106410769	universal stress protein YxiE-like	1.08214	9.13733e-12
LOC106434540	acyl-protein thioesterase 2-like	-1.39751	9.33596e-12
LOC106345559	uncharacterized LOC106345559	-14.3576	9.34864e-12
LOC106348209	uncharacterized LOC106348209	1.28803	9.39336e-12
LOC106354689	NADH kinase-like	-13.3525	9.50657e-12
LOC106443845	uncharacterized LOC106443845	-13.9734	9.51431e-12
LOC106418130	polyribonucleotide nucleotidyltransferase 1	1.60257	9.55009e-12
LOC106398879	UDP-glycosyltransferase 72B1-like	1.24734	9.60382e-12
LOC106452367	auxin-responsive protein SAUR72-like	-3.01467	9.77578e-12
LOC106374248	counting factor 45-1-like	1.79301	9.87256e-12
LOC106354828	WD repeat-containing protein 76-like	-1.64352	9.88791e-12
LOC106452364	peroxisomal 2	1.51886	9.89156e-12
LOC106415078	histone H2A variant 1-like	-1.20564	1.01042e-11
LOC106409077	glycine-rich cell wall structural protein 1-like	-1.65653	1.01089e-11
LOC106378881	uncharacterized LOC106378881	-13.8764	1.05114e-11
LOC106400537	proline-rich antigen homolog	-13.9296	1.05523e-11
LOC106400539	proline-rich antigen homolog	-13.9334	1.05746e-11
LOC106438345	histone H4	-1.21959	1.06511e-11
LOC106347948	protein CHROMATIN REMODELING 24-like	-1.12896	1.06982e-11
LOC106400538	proline-rich antigen homolog	-13.9223	1.08407e-11
LOC106417601	uncharacterized LOC106417601	-2.19538	1.08565e-11
LOC106367016	phospholipase D gamma 1	1.16067	1.11035e-11
LOC106360850	uncharacterized LOC106360850	1.45681	1.1348e-11
LOC106371208	axial regulator YABBY 1-like	-1.86943	1.14465e-11
LOC106391836	uncharacterized LOC106391836	-2.90851	1.15651e-11
LOC106446473	cell division cycle-associated protein 7	-1.22753	1.16276e-11
LOC106365633	serine/threonine-protein kinase Aurora-1-like	-1.15629	1.16299e-11
LOC106447306	bifunctional epoxide hydrolase 2-like	1.7247	1.16827e-11
LOC106372650	putative phytosulfokines 6	1.94868	1.17174e-11
LOC106392493	F-box/kelch-repeat protein At2g44130-like	1.48915	1.17361e-11
LOC106375085	uncharacterized LOC106375085	-1.45239	1.17855e-11
LOC106380040	uncharacterized LOC106380040	2.47384	1.21755e-11
LOC106353550	dehydrin ERD14-like	1.61842	1.24517e-11
LOC106386622	uncharacterized LOC106386622	12.6098	1.25811e-11
LOC106381022	PYK10-binding protein 2-like	1.52015	1.25933e-11
LOC106374247	counting factor 45-1-like	1.79425	1.25948e-11
LOC106399364	uncharacterized LOC106399364	1.49467	1.30861e-11
LOC106388475	DNA repair protein RadA homolog	-1.08318	1.33063e-11
LOC106452328	high mobility group B protein 10-like	-3.61954	1.37561e-11
LOC106385973	symplekin-like	-13.0301	1.39984e-11
LOC106347544	probable inactive L-type lectin-domain containing receptor kinase III.1	14.7472	1.40403e-11
LOC106451793	putative F-box protein At2g02030	1.65642	1.41983e-11
LOC106346756	uncharacterized LOC106346756	-1.02094	1.46879e-11
LOC106402185	uncharacterized isomerase BH0283-like	1.49538	1.47388e-11
LOC106375626	calmodulin-binding transcription activator 4-like	1.32773	1.4974e-11
LOC106393974	glutamate receptor 2.8-like	-1.79907	1.51058e-11
LOC106385057	uncharacterized LOC106385057	-1.14763	1.51617e-11
LOC106390818	uncharacterized LOC106390818	-2.87134	1.53586e-11
LOC106397487	uncharacterized LOC106397487	12.9046	1.53753e-11
LOC106411823	60S ribosomal protein L24-1	-1.00095	1.59605e-11
LOC106372424	probable sugar phosphate/phosphate translocator At5g25400	1.03623	1.61305e-11
LOC106391546	zinc finger protein ZPR1-like	2.07749	1.62666e-11
LOC106399574	uncharacterized LOC106399574	1.41275	1.6299e-11
LOC106346111	uncharacterized LOC106346111	-13.9959	1.70657e-11
LOC106438033	cytochrome P450 81D1-like	1.67168	1.72186e-11
LOC106389618	ubiquitin-conjugating enzyme E2 30	1.24284	1.73775e-11
LOC106359513	uncharacterized LOC106359513	1.14932	1.74012e-11
LOC106364650	uncharacterized LOC106364650	12.9521	1.84075e-11
LOC106377194	asparagine synthetase [glutamine-hydrolyzing]-like	2.21491	1.85081e-11
LOC106352212	uncharacterized LOC106352212	1.13203	1.85861e-11
LOC106390264	armadillo repeat-containing protein 3-like	-1.44861	1.87186e-11
LOC106445992	protein NRT1/ PTR FAMILY 6.4	1.39276	1.91529e-11
LOC106439393	transcription factor TCP4-like	-2.90097	1.94644e-11
LOC106388857	hydrophobic protein RCI2A	1.66861	1.96557e-11
LOC106381804	probable xyloglucan endotransglucosylase/hydrolase protein 16	-1.80258	2.01901e-11
LOC106362442	transcription factor TCP24-like	-1.62097	2.08584e-11
LOC106358384	ABC transporter G family member 24-like	-13.8326	2.13974e-11
LOC106379674	uncharacterized LOC106379674	13.9825	2.15494e-11
LOC106347114	beta-carotene 3-hydroxylase 1	1.26003	2.16295e-11
LOC106354068	eukaryotic translation initiation factor 5A-3	2.13309	2.16843e-11
LOC106387228	uncharacterized LOC106387228	1.68528	2.26149e-11
LOC106452222	uncharacterized LOC106452222	1.25996	2.33109e-11
LOC106371449	phenylalanine ammonia-lyase 2-like	1.66667	2.35688e-11
LOC106370321	arabinogalactan peptide 14-like	3.32887	2.40053e-11
LOC106347881	peroxidase 42-like	1.01428	2.41366e-11
LOC106401075	uncharacterized LOC106401075	-1.5734	2.46713e-11
LOC106386773	uncharacterized LOC106386773	2.03433	2.51077e-11
LOC106450986	RHOMBOID-like protein 2	1.42703	2.54028e-11
LOC106386669	protein NUCLEAR FUSION DEFECTIVE 4-like	-2.28012	2.55684e-11
LOC106354797	probable protein phosphatase 2C 18	-1.18381	2.56042e-11
LOC106386120	uncharacterized LOC106386120	1.64064	2.58479e-11
LOC106366419	uncharacterized LOC106366419	1.01284	2.60075e-11
LOC106410477	sucrose transport protein SUC2-like	2.10535	2.64362e-11
LOC106453773	uncharacterized LOC106453773	12.8816	2.6565e-11
LOC106441288	uncharacterized LOC106441288	13.85	2.68624e-11
LOC106388161	protein NRT1/ PTR FAMILY 5.1-like	1.35262	2.72869e-11
LOC106377485	myb family transcription factor APL-like	2.00097	2.73763e-11
LOC106381383	thaumatin-like protein 1b	1.27069	2.7385e-11
LOC106430064	putative protein TPRXL	1.27711	2.75231e-11
LOC106448877	metallothionein-like protein type 2	1.54586	2.86724e-11
LOC106371174	uncharacterized LOC106371174	-13.8131	2.87487e-11
LOC106409004	HVA22-like protein d	2.52825	2.91182e-11
LOC106454892	uncharacterized LOC106454892	13.2422	2.94135e-11
LOC106381581	uncharacterized LOC106381581	1.5671	2.95212e-11
LOC106416219	homeobox-leucine zipper protein ATHB-7-like	1.58196	3.06493e-11
LOC106348399	trans-cinnamate 4-monooxygenase-like	3.01735	3.07029e-11
LOC106370724	E3 ubiquitin-protein ligase SGR9	1.70594	3.09027e-11
LOC106437688	disease resistance-like protein CSA1	-1.1281	3.2027e-11
LOC106406704	uncharacterized LOC106406704	-1.72096	3.20885e-11
LOC106368832	uncharacterized LOC106368832	1.5568	3.21327e-11
LOC106354773	thiosulfate/3-mercaptopyruvate sulfurtransferase 1	-2.5431	3.25341e-11
LOC106401137	uncharacterized LOC106401137	6.96107	3.31507e-11
LOC106438088	caffeoylshikimate esterase-like	2.59035	3.31656e-11
LOC106392423	defensin-like protein 4	2.66661	3.31882e-11
LOC106453039	protein YIPF1 homolog	-1.58553	3.3442e-11
LOC106438834	myb-related protein 3R-1-like	-2.00014	3.3612e-11
LOC106452212	uncharacterized LOC106452212	13.6095	3.44569e-11
LOC106359868	uncharacterized LOC106359868	-2.00582	3.45418e-11
LOC106370369	uncharacterized LOC106370369	-1.22875	3.45433e-11
LOC106350869	probable tRNA (guanine(26)-N(2))-dimethyltransferase 2	13.2062	3.48271e-11
LOC106453825	pinoresinol reductase 1-like	2.34799	3.52027e-11
LOC106379905	plant UBX domain-containing protein 7-like	-12.9861	3.70914e-11
LOC106390070	uncharacterized LOC106390070	1.30904	3.73657e-11
LOC106368780	dnaJ homolog subfamily B member 13-like	1.87806	3.90408e-11
LOC106405481	uncharacterized LOC106405481	-1.91503	3.92956e-11
LOC106372189	S-adenosylmethionine decarboxylase proenzyme 2-like	1.90585	4.08593e-11
LOC106387508	trichohyalin-like	-1.17526	4.12855e-11
LOC106381513	myb family transcription factor APL-like	1.60372	4.13515e-11
LOC106390186	uncharacterized calcium-binding protein At1g02270-like	1.44009	4.23859e-11
LOC106406727	probable plastidic glucose transporter 2	1.26158	4.51382e-11
LOC106453038	filament-like plant protein 3	-1.12796	4.54273e-11
LOC106398395	disease resistance protein TAO1-like	1.88336	4.59943e-11
LOC106380749	uncharacterized LOC106380749	1.53941	4.60636e-11
LOC106383299	protein ASPARTIC PROTEASE IN GUARD CELL 2	2.12973	4.66698e-11
LOC106349108	cytochrome P450 85A2-like	-2.02544	4.70113e-11
LOC106449191	60S ribosomal protein L23-like	-6.24847	4.72076e-11
LOC106428688	microtubule-associated protein TORTIFOLIA1-like	-1.00169	4.73775e-11
LOC106391624	cysteine proteinase inhibitor 3-like	1.7984	4.80831e-11
LOC106375553	glycine-rich cell wall structural protein	-1.50519	4.86852e-11
LOC106443682	psbP domain-containing protein 2	-2.02843	4.94343e-11
LOC106438336	caffeoylshikimate esterase	-1.96312	5.0224e-11
LOC106454087	uncharacterized LOC106454087	12.0399	5.10399e-11
LOC106348958	respiratory burst oxidase homolog protein D	2.49657	5.14164e-11
LOC106354291	thaumatin-like protein	-1.33768	5.17929e-11
LOC106440174	uncharacterized LOC106440174	1.06798	5.18384e-11
LOC106439343	uncharacterized LOC106439343	-1.08633	5.31484e-11
LOC106356060	uncharacterized LOC106356060	-2.49461	5.59655e-11
LOC106382159	protein AIG2-like	2.00555	5.62881e-11
LOC106451152	probable peroxygenase 3	1.87653	5.63051e-11
LOC106445717	TSK-associating protein 1-like	1.05087	5.66485e-11
LOC106401136	cyclin-B2-1-like	-1.71185	5.85002e-11
LOC106364013	putative glutathione-specific gamma-glutamylcyclotransferase 2	-2.86514	5.86128e-11
LOC106388182	uncharacterized LOC106388182	5.19544	5.98082e-11
LOC106387303	RING-H2 finger protein ATL51-like	-2.4258	6.05641e-11
LOC106382506	insulin-degrading enzyme-like	1.2434	6.11491e-11
LOC106394375	zinc finger protein CONSTANS-LIKE 13-like	1.04533	6.23909e-11
LOC106445618	cold-regulated 413 plasma membrane protein 1-like	1.09298	6.24393e-11
LOC106436220	histone H4	-1.02514	6.27972e-11
LOC106348544	dehydration-responsive protein RD22-like	1.25974	6.31546e-11
LOC106449774	lipid transfer protein EARLI 1-like	-1.57733	6.46613e-11
LOC106405230	uncharacterized LOC106405230	-15.0314	6.46953e-11
LOC106356004	pathogenesis-related protein 5-like	-7.88814	6.49929e-11
LOC106359618	microtubule-associated protein RP/EB family member 1C	-1.36087	6.77968e-11
LOC106388879	uncharacterized LOC106388879	-1.08418	7.12565e-11
LOC106388305	extensin-2-like	1.15198	7.14154e-11
LOC106375212	uncharacterized LOC106375212	3.2004	7.16657e-11
LOC106408214	respiratory burst oxidase homolog protein D-like	2.16361	7.27583e-11
LOC106362541	rubisco accumulation factor 2	-2.18472	7.7787e-11
LOC106450887	uncharacterized LOC106450887	-1.38723	7.90687e-11
LOC106451288	probable serine/threonine-protein kinase DDB_G0276461	-1.92588	8.04378e-11
LOC106440107	protein POLLENLESS 3-LIKE 2	-1.11729	8.06631e-11
LOC106348262	metal-nicotianamine transporter YSL2	1.57296	8.14913e-11
LOC106396657	heat shock 70 kDa protein 8	1.15856	8.24208e-11
LOC106449544	uncharacterized LOC106449544	-14.188	8.25974e-11
LOC106445890	uncharacterized LOC106445890	1.22063	8.28701e-11
LOC106393062	putative ER lumen protein-retaining receptor C28H8.4	1.39589	8.34883e-11
LOC106438210	F-box/kelch-repeat protein At2g44130-like	1.54368	8.3702e-11
LOC106398725	probable beta-1	2.00533	8.4203e-11
LOC106405453	protein NRT1/ PTR FAMILY 2.11	1.28872	8.80178e-11
LOC106371632	histone H2B.10	-1.26149	8.83712e-11
LOC106389325	kinesin-like protein KIN12A	-1.12652	9.14195e-11
LOC106454682	uncharacterized LOC106454682	1.96162	9.20474e-11
LOC106354581	tRNA modification GTPase MnmE-like	-12.6048	9.28049e-11
LOC106362022	60S ribosomal protein L22-2-like	-2.11527	9.31992e-11
LOC106394543	uncharacterized LOC106394543	2.37246	9.4737e-11
LOC106406075	ras-related protein RABA6a	1.44798	9.68126e-11
LOC106441097	serine carboxypeptidase 24-like	-1.39439	9.70579e-11
LOC106407618	uncharacterized LOC106407618	-1.08981	9.76227e-11
LOC106345965	protein PHR1-LIKE 1-like	1.8044	9.98107e-11
LOC106380162	uncharacterized LOC106380162	2.74312	1.0029e-10
LOC106382579	phenylalanine ammonia-lyase 2	1.11526	1.00491e-10
LOC106350005	serine/threonine-protein phosphatase 2A 65 kDa regulatory subunit A alpha isoform-like	-1.80595	1.02783e-10
LOC106387635	uncharacterized LOC106387635	1.17389	1.03337e-10
LOC106392163	SNW/SKI-interacting protein-like	-1.81592	1.04504e-10
LOC106454340	uncharacterized LOC106454340	-9.08521	1.06656e-10
LOC106354551	trifunctional UDP-glucose 4	1.21034	1.08877e-10
LOC106445214	condensin complex subunit 1-like	-1.0865	1.09752e-10
LOC106355987	uncharacterized LOC106355987	2.0024	1.09922e-10
LOC106381763	3-oxoacyl-[acyl-carrier-protein] synthase I	-6.6717	1.17853e-10
LOC106402456	histone H3.2	-1.19805	1.19374e-10
LOC106450784	nuclear pore complex protein NUP98B-like	1.22719	1.20107e-10
LOC106354572	endoplasmic reticulum-Golgi intermediate compartment protein 3-like	-12.9648	1.21287e-10
LOC106451851	probable histone H2A.2	-1.41151	1.28807e-10
LOC106369387	ethylene-responsive transcription factor ERF060-like	13.5086	1.28917e-10
LOC106452674	ATPase ASNA1 homolog 2-like	-1.73138	1.30795e-10
LOC106441459	high mobility group B protein 6	-1.05872	1.31173e-10
LOC106391373	DNA mismatch repair protein MSH7-like	-1.04696	1.34155e-10
LOC106443593	uncharacterized LOC106443593	-14.684	1.34514e-10
LOC106347490	xyloglucan endotransglucosylase/hydrolase protein 31	2.21505	1.36091e-10
LOC106417544	outer membrane lipoprotein Blc-like	1.466	1.47646e-10
LOC106353948	uncharacterized LOC106353948	-1.66239	1.48138e-10
LOC106390591	protein BOBBER 1-like	1.08375	1.48925e-10
LOC106399298	glutathione S-transferase L3-like	1.31352	1.50308e-10
LOC106454730	mitotic spindle checkpoint protein BUBR1	-1.11348	1.53145e-10
LOC106387731	uncharacterized LOC106387731	1.65178	1.60966e-10
LOC106367179	UDP-glucose 6-dehydrogenase 3-like	1.01565	1.64677e-10
LOC106412462	cytochrome P450 77A3	-1.45504	1.65246e-10
LOC106367130	protein NRT1/ PTR FAMILY 7.3-like	1.73657	1.67927e-10
LOC106452361	uncharacterized LOC106452361	3.9505	1.69764e-10
LOC106415149	CBL-interacting serine/threonine-protein kinase 5-like	1.51454	1.69924e-10
LOC106369306	uncharacterized LOC106369306	-13.6178	1.72387e-10
LOC106380631	uncharacterized LOC106380631	1.89167	1.75606e-10
LOC106363590	cystine lyase CORI3-like	1.9572	1.77819e-10
LOC106417089	phragmoplast orienting kinesin 2-like	-1.06735	1.7867e-10
LOC106351594	cysteine proteinase inhibitor 6-like	1.03605	1.84315e-10
LOC106372340	calcium-dependent protein kinase 7	-1.08496	1.88873e-10
LOC106402824	BTB/POZ domain-containing protein At3g49900-like	-1.59925	1.91944e-10
LOC106440597	uncharacterized LOC106440597	-1.27195	1.9749e-10
LOC106375393	uncharacterized protein At1g65710-like	-1.76347	1.9838e-10
LOC106447959	acid beta-fructofuranosidase 3	-13.3073	2.01115e-10
LOC106377266	dof zinc finger protein DOF5.4-like	1.04166	2.02503e-10
LOC106402627	uncharacterized LOC106402627	-1.03621	2.07295e-10
LOC106440038	pyruvate	1.51262	2.09541e-10
LOC106390491	uncharacterized LOC106390491	3.85361	2.10699e-10
LOC106400683	beta-glucosidase 47-like	1.2558	2.14072e-10
LOC106356397	WAT1-related protein At1g21890-like	2.27438	2.19476e-10
LOC106389193	transcription factor TCP4-like	-3.18364	2.20074e-10
LOC106384861	cytokinin dehydrogenase 7-like	1.93576	2.23871e-10
LOC106445311	uncharacterized LOC106445311	-1.88643	2.38956e-10
LOC106366323	uncharacterized LOC106366323	1.17814	2.39464e-10
LOC106450890	MADS-box protein SOC1	2.49788	2.49573e-10
LOC106406629	membrane-associated progesterone-binding protein 4-like	1.03987	2.53668e-10
LOC106348981	uncharacterized LOC106348981	-1.04919	2.60712e-10
LOC106391482	fructose-bisphosphate aldolase	2.97399	2.61656e-10
LOC106375501	glycine-rich cell wall structural protein-like	-1.46454	2.62395e-10
LOC106346595	AT-hook motif nuclear-localized protein 28-like	-1.49304	2.72967e-10
LOC106389761	protein RMD5 homolog A-like	1.10137	2.74876e-10
LOC106385470	uncharacterized LOC106385470	-14.6906	2.80002e-10
LOC106439713	kinesin-like protein KIF22	-1.30347	2.83194e-10
LOC106345254	uncharacterized LOC106345254	2.43268	2.91285e-10
LOC106372476	E3 ubiquitin-protein ligase RING1-like	2.06753	2.9326e-10
LOC106452368	phosphoglycerate kinase 1	1.31913	2.93319e-10
LOC106367218	surfeit locus protein 2-like	-1.342	2.93484e-10
LOC106412413	chromosome-associated kinesin KIF4-like	-1.11192	2.99562e-10
LOC106447376	125 kDa kinesin-related protein-like	-1.17775	3.00923e-10
LOC106361422	uncharacterized LOC106361422	-1.79354	3.06672e-10
LOC106391708	protodermal factor 1-like	-1.09485	3.07516e-10
LOC106371212	axial regulator YABBY 1-like	-1.66452	3.12371e-10
LOC106361224	fatty acyl-CoA reductase 3-like	-1.19999	3.14053e-10
LOC106396045	histone H4	-1.05715	3.15884e-10
LOC106355620	multiprotein-bridging factor 1b-like	2.09579	3.19442e-10
LOC106375396	BTB/POZ domain-containing protein NPY1-like	-1.32495	3.23831e-10
LOC106436451	GATA transcription factor 21	-1.70592	3.33777e-10
LOC106369252	protein QUIRKY-like	-2.21678	3.38612e-10
LOC106415724	cellulose synthase A catalytic subunit 8 [UDP-forming]	1.16557	3.45761e-10
LOC106450253	uncharacterized protein At1g65710-like	-1.72774	3.50071e-10
LOC106453009	uncharacterized LOC106453009	-13.6744	3.50158e-10
LOC106390754	kinesin-like protein KIF22-A	-1.09599	3.57162e-10
LOC106439055	mitotic checkpoint protein BUB3.2	-1.21371	3.60838e-10
LOC106401687	galactokinase-like	-7.82178	3.61622e-10
LOC106388669	phosphoenolpyruvate/phosphate translocator 2	-1.75959	3.61697e-10
LOC106423085	CASP-like protein 5A1	2.27313	3.89472e-10
LOC106410419	cellulose synthase A catalytic subunit 4 [UDP-forming]-like	1.09625	3.92086e-10
LOC106447512	E3 ubiquitin-protein ligase MARCH2-like	3.98081	4.08088e-10
LOC106416626	FHA domain-containing protein PS1-like	-1.02975	4.15168e-10
LOC106360474	myrosinase-binding protein 2-like	1.97094	4.18865e-10
LOC106348326	probable carboxylesterase 18	-1.23698	4.28267e-10
LOC106354279	sucrose synthase 6	1.72603	4.40367e-10
LOC106372445	ribosomal RNA small subunit methyltransferase H-like	-1.71874	4.48694e-10
LOC106443153	uncharacterized LOC106443153	-1.00539	4.505e-10
LOC106370222	uncharacterized LOC106370222	5.3727	4.50886e-10
LOC106372638	FAD synthase-like	1.06283	4.51727e-10
LOC106375858	uncharacterized LOC106375858	1.44061	4.53275e-10
LOC106451265	pentatricopeptide repeat-containing protein At3g07290	-3.99364	4.60262e-10
LOC106382218	sm-like protein LSM4	1.44427	4.66611e-10
LOC106412213	uracil-DNA glycosylase	1.76901	4.70981e-10
LOC106441664	ATPase 1	1.1267	4.71514e-10
LOC106362024	26S protease regulatory subunit 6A homolog	-1.04379	4.75183e-10
LOC106372348	elongation factor 1-beta 1	1.31027	4.81104e-10
LOC106387638	homeobox-leucine zipper protein HDG12-like	-2.33271	4.86088e-10
LOC106389127	phenylalanine ammonia-lyase 2-like	1.25216	4.94604e-10
LOC106376726	exocyst complex component SEC5A-like	1.19596	4.9495e-10
LOC106391411	cytochrome P450 81D11-like	1.55968	5.02231e-10
LOC106368861	copper chaperone for superoxide dismutase	1.55906	5.06185e-10
LOC106372360	vacuolar protein sorting-associated protein 13-like protein	1.34347	5.09823e-10
LOC106443063	uncharacterized LOC106443063	-13.5381	5.11896e-10
LOC106418491	uncharacterized LOC106418491	-3.35549	5.13112e-10
LOC106354803	nudix hydrolase 3-like	-6.30837	5.20057e-10
LOC106392865	histone H4	-1.17303	5.3724e-10
LOC106381960	uncharacterized LOC106381960	-2.92562	5.39265e-10
LOC106382905	neurofilament medium polypeptide-like	1.31343	5.57257e-10
LOC106365616	zinc finger Ran-binding domain-containing protein 2-like	2.01315	5.57455e-10
LOC106453043	probable Xaa-Pro aminopeptidase P	-1.03633	5.59924e-10
LOC106453013	uncharacterized LOC106453013	-13.6625	5.59967e-10
LOC106362542	uncharacterized LOC106362542	-12.5104	5.79206e-10
LOC106440437	B3 domain-containing protein REM9-like	-12.78	5.79386e-10
LOC106409715	early nodulin-like protein 2	1.48763	5.84175e-10
LOC106447526	protein NRT1/ PTR FAMILY 5.1-like	1.29582	5.89046e-10
LOC106390887	uncharacterized LOC106390887	-2.63289	5.93074e-10
LOC106437669	methylesterase 9-like	1.23995	5.9611e-10
LOC106399195	putative DNA (cytosine-5)-methyltransferase CMT1	-1.05079	5.96877e-10
LOC106443064	uncharacterized LOC106443064	-14.9064	6.05377e-10
LOC106354035	lysine-rich arabinogalactan protein 19-like	1.36326	6.09714e-10
LOC106452783	expansin-B3-like	1.02515	6.22135e-10
LOC106410439	probable pectate lyase 22	1.45806	6.23612e-10
LOC106370356	protein GLUTAMINE DUMPER 3-like	1.08635	6.48707e-10
LOC106379685	3-isopropylmalate dehydrogenase 3	4.60391	6.52417e-10
LOC106354239	protein phosphatase 2C 16-like	1.1365	6.68366e-10
LOC106452373	DNA-3-methyladenine glycosylase 1-like	1.12542	6.74169e-10
LOC106401486	glyoxysomal fatty acid beta-oxidation multifunctional protein MFP-a-like	-2.52209	6.74913e-10
LOC106366048	probable LRR receptor-like serine/threonine-protein kinase At1g34110	-1.12796	6.87552e-10
LOC106390765	polyadenylate-binding protein-interacting protein 2-like	1.27503	6.88784e-10
LOC106451864	serine/threonine-protein kinase UCNL	-1.64356	6.8934e-10
LOC106357193	phosphate transporter PHO1 homolog 10	11.9314	6.95448e-10
LOC106453164	histone H3.2	-1.27991	7.03431e-10
LOC106397488	uncharacterized LOC106397488	12.5858	7.04139e-10
LOC106451909	phragmoplast orienting kinesin 2-like	-1.00527	7.04483e-10
LOC106382872	COBRA-like protein 1	-1.11817	7.08918e-10
LOC106396511	alpha-glucan water dikinase 2	1.79656	7.25e-10
LOC106407815	probable beta-1	-1.06674	7.38453e-10
LOC106441311	uncharacterized LOC106441311	4.33469	7.60265e-10
LOC106439227	inositol-3-phosphate synthase	2.07938	7.63704e-10
LOC106385280	CASP-like protein 2A1	-1.72608	7.67827e-10
LOC106349150	myb-related protein 306-like	-1.33639	7.82642e-10
LOC106354820	uncharacterized LOC106354820	-13.4519	7.88283e-10
LOC106398677	ABC transporter G family member 33-like	2.55007	8.01856e-10
LOC106347435	uncharacterized LOC106347435	-13.5434	8.04315e-10
LOC106357368	centromere protein X	-14.163	8.0492e-10
LOC106358136	21 kDa protein-like	-1.74575	8.07901e-10
LOC106451762	disease resistance protein RPM1-like	-11.77	8.20723e-10
LOC106386565	disease resistance protein TAO1-like	-6.1515	8.39614e-10
LOC106444452	putative glutathione-specific gamma-glutamylcyclotransferase 2	-2.18192	8.40959e-10
LOC106390883	BTB/POZ domain-containing protein At3g49900-like	-1.70389	8.42348e-10
LOC106416037	uncharacterized LOC106416037	-1.70707	8.46192e-10
LOC106349476	peptidyl-prolyl cis-trans isomerase CYP18-3-like	1.96751	8.52238e-10
LOC106390410	stress-induced protein KIN2-like	1.13051	8.55178e-10
LOC106346382	histone H4	-1.34314	8.56836e-10
LOC106385113	CTD nuclear envelope phosphatase 1-like	-1.2666	8.79787e-10
LOC106348211	cyclin-B2-1	-1.12627	8.81909e-10
LOC106413513	clumping factor B-like	-1.51553	8.93305e-10
LOC106357403	uncharacterized LOC106357403	2.32368	9.01299e-10
LOC106377243	uncharacterized LOC106377243	1.43676	9.05147e-10
LOC106387007	uncharacterized LOC106387007	2.29431	9.23432e-10
LOC106453050	formin-like protein 11	-1.17189	9.29406e-10
LOC106430798	kunitz-type serine protease inhibitor DrTI-like	2.32652	9.38046e-10
LOC106354361	enolase 1	-1.35006	9.39305e-10
LOC106381515	uncharacterized protein At3g43530-like	-1.18281	9.39564e-10
LOC106359784	uncharacterized LOC106359784	-12.8746	9.40466e-10
LOC106433975	serine/threonine-protein kinase ULK4-like	-1.70095	9.65911e-10
LOC106445251	protein STRICTOSIDINE SYNTHASE-LIKE 8-like	1.46928	9.72862e-10
LOC106402016	aldehyde dehydrogenase 22A1-like	-9.52585	9.81483e-10
LOC106372262	uncharacterized LOC106372262	2.02874	1.01106e-09
LOC106406875	uncharacterized LOC106406875	1.3069	1.03004e-09
LOC106400684	beta-glucosidase 47-like	1.45041	1.0501e-09
LOC106354455	uncharacterized LOC106354455	1.34654	1.05135e-09
LOC106449540	UDP-glycosyltransferase 71B1-like	4.16148	1.06727e-09
LOC106387187	shikimate O-hydroxycinnamoyltransferase-like	1.26473	1.1304e-09
LOC106407278	myosin-10-like	-1.20589	1.13421e-09
LOC106385591	myosin-9-like	-1.20673	1.17173e-09
LOC106349631	uncharacterized LOC106349631	2.13395	1.17273e-09
LOC106410762	kinesin-like protein BC2	-1.00197	1.18165e-09
LOC106349478	peptidyl-prolyl cis-trans isomerase CYP18-3-like	1.93886	1.18167e-09
LOC106438025	protein NRT1/ PTR FAMILY 5.1-like	1.47667	1.19433e-09
LOC106382518	uncharacterized LOC106382518	1.7357	1.22498e-09
LOC106448285	F-box protein At5g07670-like	-1.52825	1.23675e-09
LOC106347894	abnormal spindle-like microcephaly-associated protein homolog	-1.09886	1.25262e-09
LOC106452517	GTPase Der-like	-1.1877	1.2541e-09
LOC106367240	reticuline oxidase-like protein	1.2796	1.26029e-09
LOC106416630	probable cysteine proteinase At3g19400	1.00224	1.27449e-09
LOC106372575	ABC transporter I family member 20-like	1.56845	1.27581e-09
LOC106360537	uncharacterized LOC106360537	-1.05734	1.27778e-09
LOC106382359	cytochrome P450 71B2-like	1.50714	1.37473e-09
LOC106393706	acyltransferase-like protein At3g26840	-1.25486	1.38212e-09
LOC106379059	probable WRKY transcription factor 51	-14.2115	1.40121e-09
LOC106410625	pre-mRNA-splicing factor ATP-dependent RNA helicase PRP16-like	1.38516	1.42622e-09
LOC106405445	MLP-like protein 43	14.5546	1.433e-09
LOC106370729	uncharacterized LOC106370729	12.1614	1.45607e-09
LOC106380526	porphobilinogen deaminase	-1.59351	1.46084e-09
LOC106446080	uncharacterized LOC106446080	5.67467	1.46441e-09
LOC106449819	transcription factor MYB44	-1.33654	1.47823e-09
LOC106445302	short-chain type dehydrogenase/reductase-like	-13.2822	1.50208e-09
LOC106388711	transcription factor MYC1-like	-1.9382	1.53698e-09
LOC106400130	shaggy-related protein kinase gamma-like	-1.55782	1.6042e-09
LOC106366805	pentatricopeptide repeat-containing protein At3g02650	9.26003	1.62151e-09
LOC106441305	cysteine desulfurase	14.4731	1.63464e-09
LOC106376158	uncharacterized LOC106376158	-1.12215	1.64156e-09
LOC106356419	early nodulin-like protein 1	-1.04866	1.72842e-09
LOC106410990	Golgi to ER traffic protein 4 homolog	-1.06204	1.74572e-09
LOC106381782	GDSL esterase/lipase At5g45960-like	1.33172	1.78886e-09
LOC106364213	expansin-B3-like	1.02737	1.81651e-09
LOC106390617	protein AIG1-like	2.58716	1.81725e-09
LOC106388214	uncharacterized LOC106388214	1.45526	1.82936e-09
LOC106370649	dehydration-responsive element-binding protein 3-like	1.50038	1.85467e-09
LOC106370350	uncharacterized LOC106370350	7.13185	1.86647e-09
LOC106382650	RING finger and CHY zinc finger domain-containing protein 1-like	1.03647	1.89126e-09
LOC106375353	uncharacterized LOC106375353	-1.87768	1.9195e-09
LOC106366115	NHP2-like protein 1	-1.03875	1.95738e-09
LOC106361804	cell division control protein 45 homolog	-1.23321	1.97393e-09
LOC106411981	probable histone H2A.7	-1.69529	1.99816e-09
LOC106368022	condensin complex subunit 1-like	-1.08231	2.0051e-09
LOC106440395	malate dehydrogenase 2	-5.09118	2.02103e-09
LOC106451544	cytochrome P450 81D1	1.79264	2.0433e-09
LOC106385813	CASP-like protein 2A1	-1.63264	2.06965e-09
LOC106370646	probable glucuronokinase 2	12.9013	2.08741e-09
LOC106384874	tyrosine aminotransferase	1.75002	2.10556e-09
LOC106394610	uncharacterized LOC106394610	-3.02497	2.11445e-09
LOC106381757	uncharacterized LOC106381757	-5.75347	2.11621e-09
LOC106367118	alpha/beta hydrolase domain-containing protein 17C-like	1.04141	2.13281e-09
LOC106346004	protein translation factor SUI1 homolog	1.12867	2.15599e-09
LOC106397870	protein IQ-DOMAIN 1-like	-1.04872	2.17414e-09
LOC106443604	cyclin-dependent kinase B1-2	-1.25092	2.20514e-09
LOC106349124	uncharacterized LOC106349124	1.02694	2.22565e-09
LOC106351463	auxin-responsive protein SAUR36-like	-1.18786	2.24807e-09
LOC106396610	heat shock 70 kDa protein 5-like	1.40911	2.29531e-09
LOC106366748	protein STICHEL-like 4	-1.25924	2.30044e-09
LOC106366108	29 kDa ribonucleoprotein	-1.24188	2.31765e-09
LOC106367302	glucuronoxylan 4-O-methyltransferase 1-like	-14.7568	2.34368e-09
LOC106407676	nuclear transcription factor Y subunit A-7-like	1.74898	2.35403e-09
LOC106356392	uncharacterized LOC106356392	-1.82729	2.37675e-09
LOC106451034	WAT1-related protein At2g37460-like	1.11231	2.37801e-09
LOC106381340	glutamine synthetase cytosolic isozyme 1-2	1.48421	2.38536e-09
LOC106360354	pathogen-related protein-like	1.51781	2.48536e-09
LOC106407191	protein AIG2-like	1.09887	2.4882e-09
LOC106379190	uncharacterized LOC106379190	-14.266	2.49687e-09
LOC106364186	cyclin-B2-1-like	-1.37102	2.49792e-09
LOC106353773	germin-like protein 1	-6.30801	2.50074e-09
LOC106439137	uncharacterized LOC106439137	1.4595	2.518e-09
LOC106348176	cellulose synthase A catalytic subunit 2 [UDP-forming]	1.86949	2.53799e-09
LOC106406022	glutamate--glyoxylate aminotransferase 2	2.19281	2.55292e-09
LOC106403778	RING finger and CHY zinc finger domain-containing protein 1-like	1.33806	2.55744e-09
LOC106377605	probable histone H2A.2	-1.29576	2.58233e-09
LOC106385648	uncharacterized LOC106385648	2.77295	2.59426e-09
LOC106407297	probable sucrose-phosphate synthase 2	1.53221	2.60855e-09
LOC106376112	early nodulin-like protein 2	1.23222	2.62509e-09
LOC106394804	serine/threonine-protein kinase Aurora-3	-1.06673	2.64259e-09
LOC106372157	MATH domain and coiled-coil domain-containing protein At3g58210-like	1.13591	2.64789e-09
LOC106365246	uncharacterized LOC106365246	-1.79409	2.65967e-09
LOC106402741	kunitz-type serine protease inhibitor DrTI-like	2.61272	2.71422e-09
LOC106439728	high mobility group B protein 13-like	-1.06103	2.75489e-09
LOC106386123	uncharacterized LOC106386123	-1.5293	2.75677e-09
LOC106445972	early nodulin-like protein 2	1.15723	2.87706e-09
LOC106385610	uncharacterized LOC106385610	-1.24653	2.88177e-09
LOC106401783	tropinone reductase homolog At1g07440	1.22779	2.91454e-09
LOC106375778	tryptophan aminotransferase-related protein 2-like	-1.28398	2.95533e-09
LOC106448867	metallothionein-like protein type 2	1.59449	2.9896e-09
LOC106412145	uncharacterized LOC106412145	-1.19513	2.99145e-09
LOC106365138	early nodulin-like protein 1	-1.17939	3.00038e-09
LOC106397609	uncharacterized LOC106397609	12.8019	3.0337e-09
LOC106382618	uncharacterized LOC106382618	1.33867	3.07801e-09
LOC106384380	kinesin-like protein KIN12B	-1.17317	3.10985e-09
LOC106357861	probable xyloglucan endotransglucosylase/hydrolase protein 16	-2.12431	3.11086e-09
LOC106354571	F-box protein At1g78100-like	-12.7915	3.17991e-09
LOC106452401	uncharacterized LOC106452401	-12.8197	3.20753e-09
LOC106386568	disease resistance protein TAO1-like	-11.353	3.24546e-09
LOC106387429	probable WRKY transcription factor 2	1.51226	3.25438e-09
LOC106346397	cell wall / vacuolar inhibitor of fructosidase 1	1.5221	3.27255e-09
LOC106452360	auxin-responsive protein SAUR72-like	-2.73538	3.29625e-09
LOC106402314	basic 7S globulin-like	1.31571	3.3411e-09
LOC106451510	17.6 kDa class I heat shock protein 2	1.86816	3.40594e-09
LOC106454015	probable disease resistance protein RPP1	1.38159	3.47957e-09
LOC106378415	auxin-responsive protein IAA9-like	-14.2193	3.501e-09
LOC106381278	jacalin-related lectin 19-like	2.94919	3.50648e-09
LOC106347695	phragmoplast orienting kinesin 2	-1.03273	3.5092e-09
LOC106354818	DNA-3-methyladenine glycosylase 1-like	-1.84255	3.54064e-09
LOC106366118	origin of replication complex subunit 1B-like	-1.1495	3.56717e-09
LOC106379622	uncharacterized LOC106379622	-12.6405	3.61104e-09
LOC106385302	respiratory burst oxidase homolog protein F-like	1.6827	3.67356e-09
LOC106381559	uncharacterized LOC106381559	1.15382	3.70631e-09
LOC106410858	transcription factor TCP2-like	-1.78608	3.75239e-09
LOC106375891	uncharacterized LOC106375891	-1.13057	3.81935e-09
LOC106403069	uncharacterized LOC106403069	-1.09674	3.83156e-09
LOC106402358	E3 ubiquitin-protein ligase RING1-like	1.63222	3.88947e-09
LOC106441251	zinc-finger homeodomain protein 1-like	-1.1056	3.95785e-09
LOC106397752	protein NETWORKED 3A	-1.0644	4.01439e-09
LOC106359596	uncharacterized LOC106359596	3.40405	4.02526e-09
LOC106403712	lipoxygenase 2	3.21504	4.03389e-09
LOC106411973	putative methyltransferase DDB_G0268948	2.12168	4.04676e-09
LOC106392077	uncharacterized LOC106392077	5.53445	4.0472e-09
LOC106438572	UDP-glycosyltransferase 73B3-like	4.85694	4.21635e-09
LOC106451672	histidine kinase 1-like	1.54393	4.27695e-09
LOC106360406	uncharacterized LOC106360406	1.11512	4.28574e-09
LOC106360639	protein FAM179B-like	-1.05244	4.28789e-09
LOC106365213	uncharacterized LOC106365213	-12.4172	4.29987e-09
LOC106400786	3-ketoacyl-CoA synthase 10-like	-1.02305	4.31488e-09
LOC106358599	3-ketoacyl-CoA synthase 8	-1.01071	4.33944e-09
LOC106444453	putative glutathione-specific gamma-glutamylcyclotransferase 2	-2.75086	4.41851e-09
LOC106377385	YTH domain-containing family protein 2-like	1.72444	4.58159e-09
LOC106409944	3-ketoacyl-CoA synthase 8-like	-1.23571	4.60953e-09
LOC106411198	proline dehydrogenase 1	-2.0452	4.71195e-09
LOC106374680	uncharacterized LOC106374680	2.62519	4.89083e-09
LOC106347724	momilactone A synthase	-1.99352	4.90105e-09
LOC106437609	protein PHLOEM PROTEIN 2-LIKE A1-like	2.39627	4.90362e-09
LOC106359389	protein JASON	-1.05591	4.91465e-09
LOC106440762	jacalin-related lectin 3-like	2.87752	4.93066e-09
LOC106374464	uncharacterized LOC106374464	-1.17025	4.98229e-09
LOC106417654	uncharacterized LOC106417654	1.39023	4.98646e-09
LOC106447562	cytochrome P450 83A1-like	1.27088	4.99264e-09
LOC106440084	vacuolar cation/proton exchanger 3-like	1.12541	5.00555e-09
LOC106407808	scarecrow-like protein 28	-1.10314	5.05012e-09
LOC106386336	cellulose synthase A catalytic subunit 7 [UDP-forming]	1.02461	5.05804e-09
LOC106345956	U11/U12 small nuclear ribonucleoprotein 48 kDa protein-like	1.29041	5.12577e-09
LOC106441171	uncharacterized LOC106441171	2.01476	5.12902e-09
LOC106445976	uncharacterized LOC106445976	-7.31735	5.13012e-09
LOC106386894	uncharacterized LOC106386894	13.2241	5.21338e-09
LOC106411280	UDP-N-acetylglucosamine--N-acetylmuramyl-(pentapeptide) pyrophosphoryl-undecaprenol N-acetylglucosamine transferase-like	1.0947	5.24647e-09
LOC106411148	uncharacterized LOC106411148	1.88005	5.26232e-09
LOC106367961	copper transport protein CCH-like	1.52947	5.29841e-09
LOC106438524	protein CYPRO4-like	-1.02276	5.37635e-09
LOC106349919	uncharacterized LOC106349919	-11.9025	5.41698e-09
LOC106372040	expansin-A1-like	1.37683	5.43359e-09
LOC106375475	uncharacterized LOC106375475	-1.41357	5.4747e-09
LOC106406314	methyltransferase-like protein 7A	2.69016	5.50397e-09
LOC106372457	uncharacterized LOC106372457	3.96911	5.546e-09
LOC106402381	uncharacterized LOC106402381	-1.27717	5.57026e-09
LOC106404152	UDP-arabinopyranose mutase 1	-1.18734	5.58991e-09
LOC106454893	uncharacterized LOC106454893	12.9892	5.6487e-09
LOC106455028	dof zinc finger protein DOF3.1-like	1.38251	5.75197e-09
LOC106375482	peroxidase A2-like	1.81982	5.77201e-09
LOC106365661	uncharacterized LOC106365661	-1.33486	5.77619e-09
LOC106410606	ammonium transporter 2-like	1.16756	5.80511e-09
LOC106385828	methionine aminotransferase BCAT4-like	4.17323	5.84138e-09
LOC106348971	nitrile-specifier protein 5	-1.17902	5.8889e-09
LOC106415900	uncharacterized LOC106415900	4.96148	5.92965e-09
LOC106417166	uncharacterized LOC106417166	1.92993	5.98318e-09
LOC106441211	putative UDP-arabinose 4-epimerase 2	1.55948	6.08547e-09
LOC106438070	delta-1-pyrroline-5-carboxylate synthase A-like	1.16781	6.11485e-09
LOC106399390	protein E6	1.38463	6.18222e-09
LOC106385051	syntaxin-related protein KNOLLE-like	-1.19694	6.29798e-09
LOC106401780	26S protease regulatory subunit 6A homolog	-1.00226	6.30791e-09
LOC106452809	hevein-like preproprotein	1.89195	6.31197e-09
LOC106381277	jacalin-related lectin 19-like	2.54334	6.32503e-09
LOC106380834	tropinone reductase homolog At5g06060	1.1647	6.36154e-09
LOC106451511	17.6 kDa class I heat shock protein 2-like	1.98597	6.60236e-09
LOC106362349	histone H3.2	-1.32621	6.66603e-09
LOC106367442	uncharacterized LOC106367442	1.80257	6.68354e-09
LOC106387938	65-kDa microtubule-associated protein 3	-1.05808	6.71302e-09
LOC106393499	putative chromatin-remodeling complex ATPase chain	1.45924	6.73889e-09
LOC106443382	transcription factor SPEECHLESS-like	-1.8498	6.74101e-09
LOC106406035	uncharacterized LOC106406035	-1.28207	6.79724e-09
LOC106442496	acyl carrier protein 4	-1.56475	6.88221e-09
LOC106349121	probable eukaryotic translation initiation factor 5-2	-2.30006	6.9578e-09
LOC106386119	cold-regulated 413 plasma membrane protein 4-like	4.26893	6.96747e-09
LOC106451221	BTB/POZ domain-containing protein At3g49900-like	-1.8622	7.00719e-09
LOC106399829	tryptophan synthase beta chain 1-like	1.80671	7.03696e-09
LOC106346107	ubiquitin-like-specific protease 1A	1.04078	7.12347e-09
LOC106346116	protein TRIGALACTOSYLDIACYLGLYCEROL 4	-1.0539	7.31482e-09
LOC106380862	lipoxygenase 2	3.13337	7.45456e-09
LOC106368139	TPR repeat-containing thioredoxin TTL4-like	-1.12689	7.49121e-09
LOC106353590	uncharacterized LOC106353590	-1.02299	7.59274e-09
LOC106351773	uncharacterized LOC106351773	-12.3616	7.69951e-09
LOC106410953	probable histone H2A variant 2	-1.12113	7.82469e-09
LOC106372578	probable serine/threonine-protein kinase NAK	2.55793	7.90302e-09
LOC106393959	cinnamyl alcohol dehydrogenase 5	1.3389	7.95319e-09
LOC106396884	uncharacterized LOC106396884	-1.12234	8.01564e-09
LOC106381822	COP9 signalosome complex subunit 3-like	1.77037	8.17671e-09
LOC106371942	TOM1-like protein 2	1.29437	8.22257e-09
LOC106449265	MLP-like protein 328	2.06768	8.24655e-09
LOC106357307	protein RADIALIS-like 6	1.65571	8.29111e-09
LOC106386923	uncharacterized LOC106386923	11.7259	8.44964e-09
LOC106402812	65-kDa microtubule-associated protein 3-like	-1.07494	8.5358e-09
LOC106401176	protein MODIFIER OF SNC1 11-like	1.01286	8.56641e-09
LOC106359832	uncharacterized LOC106359832	-1.21018	8.64015e-09
LOC106372697	salicylate/benzoate carboxyl methyltransferase-like	1.22585	8.69215e-09
LOC106438157	abscisic acid receptor PYL4-like	-2.0104	8.78108e-09
LOC106366531	lysophospholipid acyltransferase 2	-1.09152	8.78116e-09
LOC106453026	serine carboxypeptidase-like 29	-1.10124	8.78292e-09
LOC106385939	vesicle transport protein GOT1B-like	13.2127	8.8734e-09
LOC106372481	alpha-hydroxynitrile lyase	1.13215	8.93274e-09
LOC106442268	uncharacterized LOC106442268	3.12457	8.98561e-09
LOC106347483	uncharacterized LOC106347483	1.78365	9.00799e-09
LOC106433397	uncharacterized LOC106433397	-12.7676	9.02112e-09
LOC106440134	zinc finger A20 and AN1 domain-containing stress-associated protein 2-like	1.00333	9.06437e-09
LOC106387146	beta-glucosidase 3-like	3.7635	9.20975e-09
LOC106376281	uncharacterized LOC106376281	1.73352	9.22527e-09
LOC106381040	alpha/beta hydrolase domain-containing protein 17C-like	1.01312	9.29874e-09
LOC106359860	MLP-like protein 328	-5.3275	9.31281e-09
LOC106445219	probable WRKY transcription factor 70	-2.47418	9.32395e-09
LOC106374249	counting factor 45-1-like	1.77047	9.33831e-09
LOC106354529	30S ribosomal protein S9	-1.75157	9.44042e-09
LOC106363189	uncharacterized LOC106363189	12.5384	9.45e-09
LOC106407582	nuclear transcription factor Y subunit A-7-like	2.05849	9.49274e-09
LOC106375035	histone H3-like centromeric protein HTR12	-1.17705	9.51908e-09
LOC106441209	CTP synthase 1	1.41025	9.55344e-09
LOC106452446	phenylalanine ammonia-lyase 2-like	1.17349	9.60617e-09
LOC106416532	T-complex protein 1 subunit theta-like	-1.26911	9.67135e-09
LOC106387173	uncharacterized LOC106387173	-1.54035	9.74938e-09
LOC106351010	putative cyclin-A3-1	12.8547	9.76814e-09
LOC106409059	uncharacterized LOC106409059	-13.0883	9.86271e-09
LOC106390755	kinesin-like protein KIF22-A	-1.04551	9.87287e-09
LOC106359822	ctenidin-3-like	-1.56321	9.91868e-09
LOC106410659	transcription initiation factor TFIID subunit 2-like	1.22833	9.94456e-09
LOC106388509	uncharacterized LOC106388509	-1.41106	9.96594e-09
LOC106352357	uncharacterized LOC106352357	-1.05547	1.03742e-08
LOC106439845	purple acid phosphatase 10-like	2.6063	1.03751e-08
LOC106389292	kinesin-like protein KIN12A	-1.23767	1.04042e-08
LOC106347866	uncharacterized LOC106347866	1.40548	1.04632e-08
LOC106438736	cyclin-A2-4-like	-2.10308	1.04742e-08
LOC106410890	early nodulin-like protein 3	-1.08775	1.05979e-08
LOC106352935	uncharacterized LOC106352935	-13.0388	1.06519e-08
LOC106380660	uncharacterized LOC106380660	-13.5749	1.07646e-08
LOC106353177	uncharacterized LOC106353177	-1.03431	1.09528e-08
LOC106449109	defensin-like protein 193	1.085	1.1403e-08
LOC106439532	hyoscyamine 6-dioxygenase-like	-1.84669	1.16575e-08
LOC106410767	glucose-1-phosphate adenylyltransferase large subunit 3	1.34972	1.17563e-08
LOC106445601	protein NRT1/ PTR FAMILY 7.3	2.34324	1.18768e-08
LOC106399949	reticulon-like protein B18	-1.07523	1.20145e-08
LOC106411788	histone H4	-1.12451	1.20533e-08
LOC106399639	protein RALF-like 27	1.48569	1.20741e-08
LOC106366801	aspartic proteinase-like protein 2	12.0189	1.22169e-08
LOC106447644	WAT1-related protein At4g01450-like	2.82524	1.22367e-08
LOC106416228	50S ribosomal protein L35	-1.64755	1.2317e-08
LOC106381328	microsomal glutathione S-transferase 3-like	1.37029	1.23256e-08
LOC106396676	universal stress protein A-like protein	1.11436	1.2663e-08
LOC106387141	uncharacterized LOC106387141	1.72043	1.28136e-08
LOC106390245	uncharacterized LOC106390245	1.05797	1.30943e-08
LOC106366160	protein NRT1/ PTR FAMILY 2.11-like	2.0416	1.32602e-08
LOC106345432	uncharacterized LOC106345432	4.49058	1.33097e-08
LOC106411918	histone H4	-1.12808	1.34067e-08
LOC106380625	uncharacterized LOC106380625	2.38055	1.35808e-08
LOC106381855	cytochrome P450 72A15-like	1.01083	1.36355e-08
LOC106412426	F-box protein At1g10780-like	-1.06815	1.36439e-08
LOC106441732	UPF0496 protein At2g18630-like	1.10621	1.36844e-08
LOC106349636	diphthine--ammonia ligase	1.02937	1.3695e-08
LOC106415761	myosin heavy chain	-1.1429	1.37912e-08
LOC106394243	uncharacterized LOC106394243	4.3597	1.38791e-08
LOC106388357	F-box/kelch-repeat protein At2g44130-like	1.41242	1.40872e-08
LOC106451273	uncharacterized LOC106451273	-4.04688	1.42095e-08
LOC106385223	putative Delta(7)-sterol-C5(6)-desaturase 2	-2.16587	1.44405e-08
LOC106387111	glutathione gamma-glutamylcysteinyltransferase 1-like	1.72201	1.4536e-08
LOC106383001	probable histone H2A.2	-1.38671	1.45731e-08
LOC106395666	tripartite motif-containing protein 44-like	6.01263	1.4633e-08
LOC106415013	putative ion channel POLLUX-like 2	-2.89294	1.48024e-08
LOC106413812	uncharacterized LOC106413812	-1.20082	1.49128e-08
LOC106375313	probable malate dehydrogenase	1.81937	1.50257e-08
LOC106358094	E3 ubiquitin-protein ligase RING1-like	1.39786	1.50436e-08
LOC106348203	probable LRR receptor-like serine/threonine-protein kinase At5g63710	1.08381	1.52018e-08
LOC106413316	transmembrane protein 53-like	1.67002	1.52303e-08
LOC106391568	uncharacterized acetyltransferase At3g50280-like	2.48779	1.53001e-08
LOC106385228	ATP-dependent zinc metalloprotease FTSH 6	12.1371	1.53952e-08
LOC106394646	uncharacterized LOC106394646	-1.45243	1.57362e-08
LOC106347834	neurofilament heavy polypeptide-like	-1.02089	1.58893e-08
LOC106358008	uncharacterized LOC106358008	1.25784	1.60143e-08
LOC106385162	uncharacterized LOC106385162	1.36884	1.65934e-08
LOC106402231	glutaredoxin-C5	-2.12388	1.6675e-08
LOC106352871	DJ-1 protein homolog F-like	1.32414	1.75415e-08
LOC106349138	expansin-A5-like	1.18929	1.77986e-08
LOC106454147	CBL-interacting serine/threonine-protein kinase 15-like	-1.38923	1.78493e-08
LOC106354764	protein PAT1 homolog 1	-1.09929	1.83851e-08
LOC106358280	uncharacterized LOC106358280	13.6325	1.84989e-08
LOC106421601	uncharacterized LOC106421601	1.56232	1.87019e-08
LOC106380781	auxin-responsive protein SAUR21-like	2.82632	1.87906e-08
LOC106408193	myb-related protein 306-like	-1.60061	1.89394e-08
LOC106404431	BAHD acyltransferase DCR-like	-1.32625	1.91262e-08
LOC106386358	uncharacterized LOC106386358	-2.20697	1.91692e-08
LOC106370166	delta-9 acyl-lipid desaturase 1	-1.65039	1.94852e-08
LOC106388337	basic endochitinase CHB4-like	1.25756	1.94885e-08
LOC106385792	uncharacterized LOC106385792	-1.15848	1.95507e-08
LOC106381550	NADH dehydrogenase [ubiquinone] iron-sulfur protein 8-A	1.02414	1.95669e-08
LOC106441172	uncharacterized LOC106441172	2.48047	1.9674e-08
LOC106356969	uncharacterized LOC106356969	-12.1183	1.97444e-08
LOC106429326	peptide methionine sulfoxide reductase A3-like	-5.78067	2.0025e-08
LOC106385150	histone H2B.10-like	-1.1201	2.01746e-08
LOC106379256	protein RESTRICTED TEV MOVEMENT 2-like	1.94423	2.03603e-08
LOC106358423	uncharacterized LOC106358423	-5.02304	2.04535e-08
LOC106366524	uncharacterized LOC106366524	-3.51361	2.04863e-08
LOC106366148	histone H2B.8	-1.11982	2.06907e-08
LOC106353835	ninja-family protein AFP1-like	1.63155	2.11519e-08
LOC106352490	wound-induced protein 1-like	1.66441	2.13112e-08
LOC106366778	AP2-like ethylene-responsive transcription factor TOE3	1.54553	2.13975e-08
LOC106406249	peptidyl-prolyl cis-trans isomerase CYP37	-1.3314	2.18346e-08
LOC106364396	uncharacterized LOC106364396	-14.4579	2.2072e-08
LOC106442018	sodium/hydrogen exchanger 3-like	1.58476	2.21859e-08
LOC106365672	uncharacterized LOC106365672	-9.17175	2.23706e-08
LOC106433849	anamorsin homolog	-1.00901	2.24951e-08
LOC106395044	MLP-like protein 31	2.13555	2.28356e-08
LOC106421152	probable peroxygenase 4	1.48355	2.30133e-08
LOC106447406	cell division control protein 45 homolog	-1.48837	2.3023e-08
LOC106396524	alpha-galactosidase 2	1.08589	2.30914e-08
LOC106452015	uncharacterized LOC106452015	-1.08812	2.32666e-08
LOC106354432	UDP-glycosyltransferase 78D2-like	1.28878	2.34581e-08
LOC106450947	ammonium transporter 2-like	1.81817	2.36014e-08
LOC106354078	expansin-A1-like	1.40025	2.42858e-08
LOC106390099	indole-3-acetic acid-amido synthetase GH3.6	1.1705	2.4364e-08
LOC106354263	kunitz-type serine protease inhibitor DrTI-like	2.55778	2.5443e-08
LOC106366281	protein DA1-related 3-like	11.7464	2.58784e-08
LOC106382144	50S ribosomal protein L12-1	-1.11425	2.61343e-08
LOC106362263	histone H4	-1.14341	2.63788e-08
LOC106438408	axial regulator YABBY 5	-2.08315	2.6586e-08
LOC106360973	RNA-binding protein CP33	-1.34153	2.69018e-08
LOC106420440	transcription factor bHLH112-like	1.0099	2.6979e-08
LOC106439321	NADH dehydrogenase [ubiquinone] flavoprotein 2	12.4377	2.75207e-08
LOC106363990	WAT1-related protein At3g30340-like	2.05224	2.81555e-08
LOC106387172	uncharacterized LOC106387172	1.41326	2.84743e-08
LOC106367151	ABC transporter G family member 14-like	1.25107	2.84744e-08
LOC106449543	uncharacterized LOC106449543	-13.3063	2.89053e-08
LOC106446972	17.6 kDa class I heat shock protein 2-like	1.63667	2.91616e-08
LOC106347996	L-ascorbate peroxidase 5	1.27207	2.91721e-08
LOC106377031	putative axial regulator YABBY 2	-1.06682	2.94003e-08
LOC106377540	calcium-transporting ATPase 8	1.1739	2.98927e-08
LOC106351455	uncharacterized LOC106351455	1.14537	3.00619e-08
LOC106405513	YTH domain-containing family protein 2-like	2.02938	3.00683e-08
LOC106401098	ubiquitin-conjugating enzyme E2 1-like	1.28383	3.01207e-08
LOC106451875	nuclear transcription factor Y subunit A-9-like	1.65177	3.01283e-08
LOC106446459	serine/threonine-protein kinase SRK2J	1.34095	3.01416e-08
LOC106354757	laccase-4-like	1.30817	3.02286e-08
LOC106345416	uncharacterized LOC106345416	4.55491	3.0492e-08
LOC106360261	uncharacterized LOC106360261	1.40006	3.15418e-08
LOC106445627	uncharacterized LOC106445627	-1.67277	3.17184e-08
LOC106453249	cytokinin riboside 5'-monophosphate phosphoribohydrolase LOG5-like	3.81024	3.17659e-08
LOC106447565	zinc finger protein 8-like	-2.77186	3.17773e-08
LOC106347330	uncharacterized LOC106347330	-5.18905	3.1933e-08
LOC106366545	uncharacterized LOC106366545	-1.35258	3.22325e-08
LOC106366185	probable pectate lyase 22	1.069	3.2405e-08
LOC106368702	uncharacterized LOC106368702	1.39021	3.26955e-08
LOC106377043	uncharacterized LOC106377043	-1.04963	3.31875e-08
LOC106364540	protein EPIDERMAL PATTERNING FACTOR 2-like	-2.75926	3.34361e-08
LOC106439680	primary amine oxidase-like	1.78906	3.3666e-08
LOC106381928	uncharacterized LOC106381928	-12.6245	3.54057e-08
LOC106451625	probable LRR receptor-like serine/threonine-protein kinase At1g51860	-2.52635	3.57122e-08
LOC106453325	uncharacterized LOC106453325	-13.0686	3.61858e-08
LOC106400830	pentatricopeptide repeat-containing protein At5g46580	-1.05666	3.64229e-08
LOC106451763	sterol 3-beta-glucosyltransferase UGT80A2-like	-7.92037	3.65818e-08
LOC106383660	pollen-specific protein SF21-like	1.01741	3.67106e-08
LOC106361248	ruBisCO large subunit-binding protein subunit beta	-1.45233	3.67435e-08
LOC106385436	uncharacterized LOC106385436	-13.0011	3.73772e-08
LOC106385157	21 kDa protein-like	-1.15146	3.74008e-08
LOC106360543	50S ribosomal protein L18	-1.43128	3.74042e-08
LOC106401064	B3 domain-containing transcription factor NGA3-like	-4.9254	3.81481e-08
LOC106351292	uncharacterized LOC106351292	-1.11463	3.86515e-08
LOC106384999	DNA annealing helicase and endonuclease ZRANB3-like	-1.00724	3.8699e-08
LOC106378250	adenylyl-sulfate kinase 2	1.78627	3.87463e-08
LOC106408244	ATPase 3	1.70613	3.88049e-08
LOC106355213	callose synthase 3-like	1.41639	3.88804e-08
LOC106405954	putative ABC transporter C family member 15	1.63663	3.90388e-08
LOC106353636	methionine adenosyltransferase 2 subunit beta-like	1.06465	3.92052e-08
LOC106385049	syntaxin-related protein KNOLLE-like	-1.1521	3.95271e-08
LOC106402566	phosphoglucan phosphatase DSP4	1.04922	3.97296e-08
LOC106438319	uncharacterized LOC106438319	1.29952	3.97956e-08
LOC106409360	uncharacterized LOC106409360	-1.77588	4.00574e-08
LOC106346203	wall-associated receptor kinase-like 15	2.0661	4.08968e-08
LOC106348908	probable E3 ubiquitin-protein ligase DTX3	1.34786	4.10146e-08
LOC106451441	uncharacterized LOC106451441	7.49914	4.12287e-08
LOC106377637	putative UDP-arabinose 4-epimerase 4	1.4885	4.21383e-08
LOC106356074	uncharacterized LOC106356074	2.13223	4.26584e-08
LOC106353695	phosphoethanolamine N-methyltransferase 3-like	1.43569	4.36497e-08
LOC106350370	two-component response regulator ARR4-like	-1.12944	4.38674e-08
LOC106397989	cell wall protein DAN4-like	2.73688	4.38822e-08
LOC106410637	probable acyl-activating enzyme 18	1.52018	4.44776e-08
LOC106390715	30S ribosomal protein 2	-1.22002	4.49619e-08
LOC106379967	putative invertase inhibitor	1.48698	4.52459e-08
LOC106413465	putative ion channel POLLUX-like 2	-3.3038	4.53191e-08
LOC106387653	laccase-1-like	-1.62969	4.54987e-08
LOC106366149	histone H4	-1.0544	4.57491e-08
LOC106397919	3-ketoacyl-CoA synthase 16-like	-1.71196	4.58195e-08
LOC106361432	heterodimeric geranylgeranyl pyrophosphate synthase large subunit 1	-12.2846	4.62205e-08
LOC106389810	uncharacterized LOC106389810	-12.9926	4.67649e-08
LOC106451287	uncharacterized LOC106451287	-1.46184	4.70758e-08
LOC106397605	probable histone H2A.2	-1.37395	4.7302e-08
LOC106445310	uncharacterized LOC106445310	-11.623	4.76668e-08
LOC106356542	thiosulfate sulfurtransferase 18-like	4.38542	4.76742e-08
LOC106377472	probable mediator of RNA polymerase II transcription subunit 37c	3.1658	4.77469e-08
LOC106387250	protein TIFY 10B-like	2.06873	4.78503e-08
LOC106360452	glutamine synthetase cytosolic isozyme 1-3-like	1.00118	4.80689e-08
LOC106451270	uncharacterized LOC106451270	-1.16999	4.84615e-08
LOC106363215	non-specific lipid transfer protein GPI-anchored 1-like	-1.2781	4.91921e-08
LOC106365662	histone deacetylase 19-like	-7.37963	5.02052e-08
LOC106375464	ABC transporter G family member 22-like	2.46428	5.02956e-08
LOC106359968	uncharacterized LOC106359968	-12.0402	5.03086e-08
LOC106440010	probable calcium-binding protein CML41	1.88049	5.07996e-08
LOC106386281	dentin sialophosphoprotein-like	-1.01518	5.08141e-08
LOC106360093	vacuolar iron transporter homolog 2.1	1.50603	5.09139e-08
LOC106386099	acanthoscurrin-1-like	-1.55828	5.10275e-08
LOC106358592	homeobox-leucine zipper protein HDG12-like	-2.08878	5.11827e-08
LOC106394949	uncharacterized LOC106394949	-1.15858	5.17194e-08
LOC106404489	probable calcium-binding protein CML26	2.06506	5.1985e-08
LOC106395166	uncharacterized LOC106395166	-1.39983	5.25728e-08
LOC106399369	uncharacterized protein OsI_027940-like	1.44293	5.25954e-08
LOC106393240	cyclin-B1-1-like	-1.33654	5.31553e-08
LOC106377178	tubulin-folding cofactor B	1.08011	5.3179e-08
LOC106345588	homeobox-leucine zipper protein ATHB-12-like	3.2715	5.36072e-08
LOC106360936	potassium channel GORK-like	1.5032	5.37189e-08
LOC106406751	cytokinin dehydrogenase 7-like	2.16709	5.3733e-08
LOC106450483	homeobox-leucine zipper protein ATHB-7-like	1.30728	5.4916e-08
LOC106369808	homeobox-leucine zipper protein ATHB-40	2.03486	5.49527e-08
LOC106411016	homeobox-leucine zipper protein PROTODERMAL FACTOR 2-like	-1.23866	5.49576e-08
LOC106386810	serine/threonine-protein kinase ULK4-like	-1.4565	5.59506e-08
LOC106385239	uncharacterized LOC106385239	-1.40222	5.64019e-08
LOC106406884	uncharacterized LOC106406884	-13.2044	5.70315e-08
LOC106410100	callose synthase 3	1.49406	5.75619e-08
LOC106371973	binding partner of ACD11 1-like	-3.82561	5.77137e-08
LOC106388416	outer membrane lipoprotein Blc-like	1.39081	5.85223e-08
LOC106367391	putative zinc finger CCCH domain-containing protein 10	-12.0285	6.0041e-08
LOC106388387	axial regulator YABBY 5-like	-2.14514	6.19417e-08
LOC106445421	3-oxoacyl-[acyl-carrier-protein] synthase III	-1.08519	6.21371e-08
LOC106429344	peptide methionine sulfoxide reductase A3-like	-6.70532	6.30487e-08
LOC106361460	uncharacterized LOC106361460	-12.0907	6.30549e-08
LOC106384945	amino acid permease 2-like	1.47996	6.3263e-08
LOC106452810	hevein-like preproprotein	1.8412	6.34112e-08
LOC106368228	UDP-arabinopyranose mutase 2	2.05114	6.38457e-08
LOC106354122	multicopper oxidase LPR2-like	1.08576	6.39823e-08
LOC106401824	lectin-like protein At3g16530	1.12858	6.60039e-08
LOC106416217	uncharacterized LOC106416217	1.09366	6.63069e-08
LOC106367114	probable inactive heme oxygenase 2	-1.06075	6.65641e-08
LOC106396186	ethanolamine-phosphate cytidylyltransferase-like	-13.55	6.69643e-08
LOC106397472	putative lactoylglutathione lyase	3.47886	6.71666e-08
LOC106447216	fatty acid 2-hydroxylase 1-like	-1.18261	6.74742e-08
LOC106429058	metallothionein-like protein type 2	1.30191	6.75882e-08
LOC106396908	primary amine oxidase-like	1.83807	6.80129e-08
LOC106402347	uncharacterized LOC106402347	-1.33805	6.95976e-08
LOC106451346	importin beta-like SAD2	-1.42718	6.97778e-08
LOC106353355	protein TOO MANY MOUTHS-like	-2.58731	7.00151e-08
LOC106348844	uncharacterized LOC106348844	1.02896	7.20029e-08
LOC106381411	probable serine/threonine-protein kinase NAK	1.48803	7.23148e-08
LOC106360996	protein BREAST CANCER SUSCEPTIBILITY 1 homolog	-1.10345	7.312e-08
LOC106354498	probable ubiquitin-conjugating enzyme E2 16	1.33745	7.32405e-08
LOC106451791	uncharacterized LOC106451791	1.27274	7.34549e-08
LOC106345992	probable histone H2A.2	-1.3886	7.35989e-08
LOC106439660	4-coumarate--CoA ligase 4-like	1.14811	7.3633e-08
LOC106368542	3-ketoacyl-CoA synthase 10-like	-1.04741	7.38425e-08
LOC106353409	YTH domain-containing family protein 2-like	1.84921	7.3979e-08
LOC106392319	universal stress protein A-like protein	2.07757	7.45224e-08
LOC106394808	cyclin-dependent kinases regulatory subunit 2-like	-1.17076	7.50125e-08
LOC106367449	uncharacterized LOC106367449	1.09719	7.5482e-08
LOC106440826	cyclin-B1-1-like	-1.09322	7.58612e-08
LOC106354342	chaperone protein ClpB1	2.47745	7.77436e-08
LOC106450747	CSC1-like protein At1g11960	2.97553	7.80279e-08
LOC106451371	transcription factor TCP10-like	-2.38505	7.84724e-08
LOC106354264	kunitz-type serine protease inhibitor DrTI-like	2.63431	7.85519e-08
LOC106400003	protein GLUTAMINE DUMPER 6-like	1.93818	7.90711e-08
LOC106450744	CSC1-like protein At1g11960	2.87375	7.94244e-08
LOC106402125	L-Ala-D/L-amino acid epimerase-like	-3.77381	8.02817e-08
LOC106348515	pyridoxal 5'-phosphate synthase-like subunit PDX1.2	1.21885	8.03644e-08
LOC106361080	uncharacterized LOC106361080	1.30776	8.05495e-08
LOC106357361	protein FLOWERING LOCUS T-like	5.62627	8.13083e-08
LOC106447594	protodermal factor 1-like	-1.06537	8.22722e-08
LOC106418337	30S ribosomal protein S17	-1.13034	8.27971e-08
LOC106444247	ubiquitin-conjugating enzyme E2 29-like	1.77705	8.33067e-08
LOC106415470	universal stress protein YxiE-like	2.73309	8.34355e-08
LOC106401983	germin-like protein subfamily 2 member 2	1.28943	8.34445e-08
LOC106418402	uncharacterized LOC106418402	-1.01994	8.35061e-08
LOC106346666	SNF1-related protein kinase regulatory subunit gamma-like PV42a	2.06766	8.37381e-08
LOC106389885	probable UDP-arabinose 4-epimerase 3	-4.62414	8.43318e-08
LOC106387279	WAT1-related protein At3g02690	-1.40931	8.44569e-08
LOC106452159	serine/threonine-protein kinase Aurora-3-like	-1.14793	8.51735e-08
LOC106448255	patellin-6-like	-1.42261	8.52081e-08
LOC106451671	uncharacterized LOC106451671	1.13874	8.72379e-08
LOC106406014	B-box zinc finger protein 20-like	-1.79583	8.74128e-08
[truncated: 3,360 more rows]

## Sheet: MT VS ST 30
Supplemental Data1. The DEGs between MS mutant and WT at different DAG.
[truncated: 3,593 more rows]

[truncated: 1 more sheets: MT VS ST 35]
