# Supplementary material for: Cytokinin Signaling Are Required for Multi-Main Stems Development in <em>Brassica napus</em> L.
Source: Preprints.org preprint supplement (doi:10.20944/preprints202304.0586.v1), 2023-04-19
Supplement: Supplementary file 1 [file supplementary]

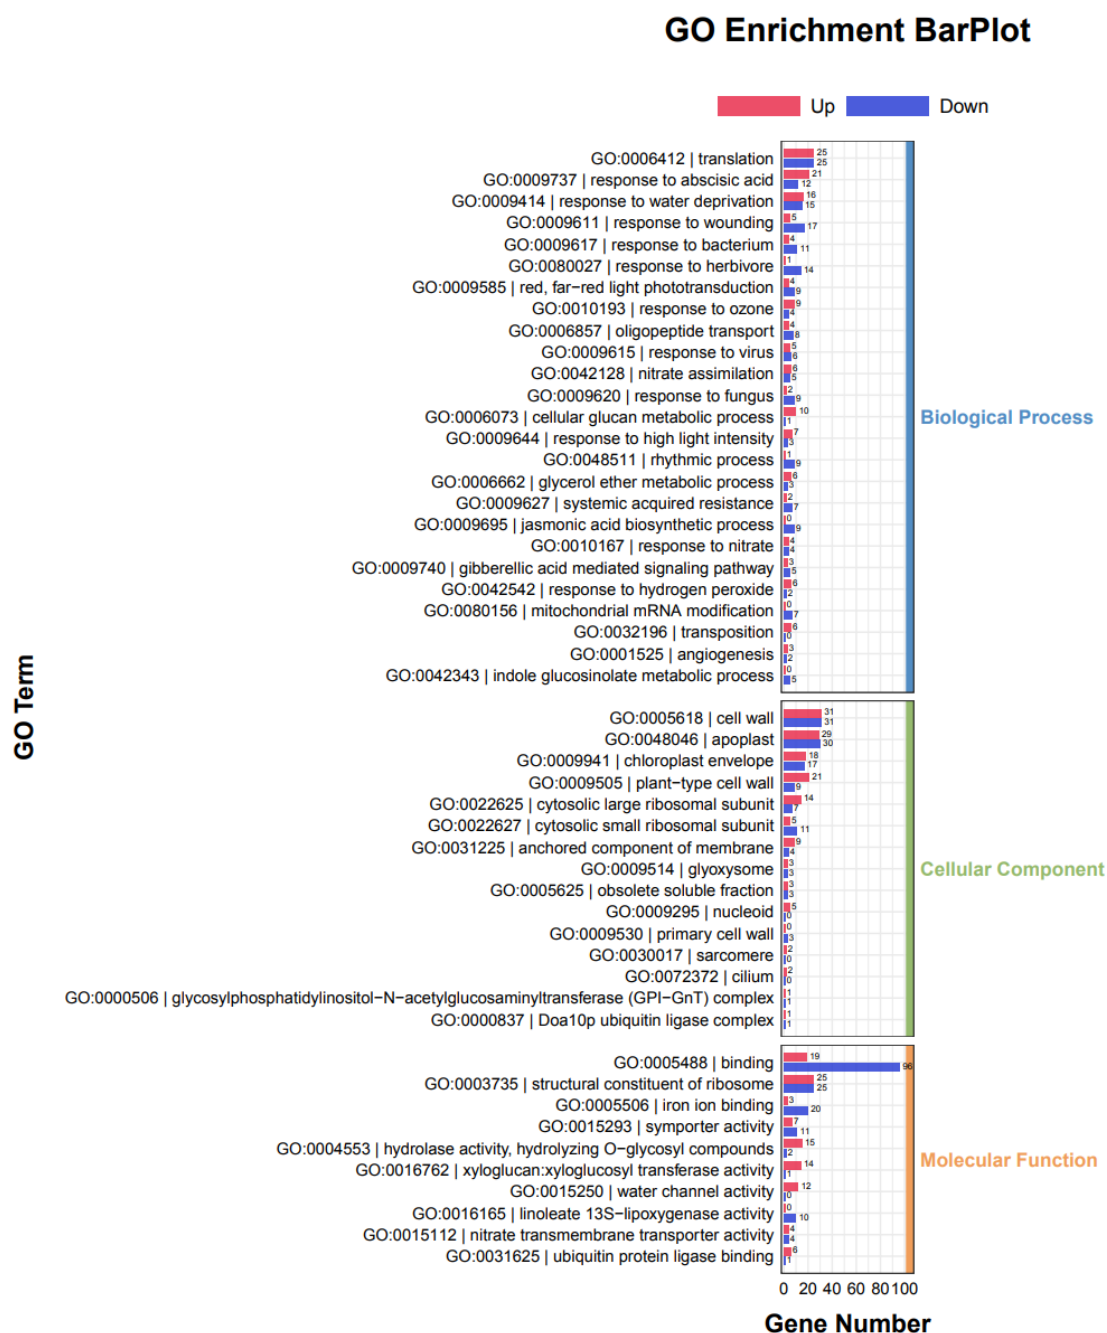

**Figure S1.** The GO enrichment analysis of DEGs between *MS* mutant and WT at 15 days after germination (DAG).

All significantly enriched GO terms ( $P$  value < 0.05) based on biological process, cellular component, and molecular function enriched from the DEGs between the *MS* mutant and WT at DAG15. Number of up- and down-regulated DEGs of enriched GO terms were shown. Complete data can be found in Table S2.

## GO Enrichment BarPlot

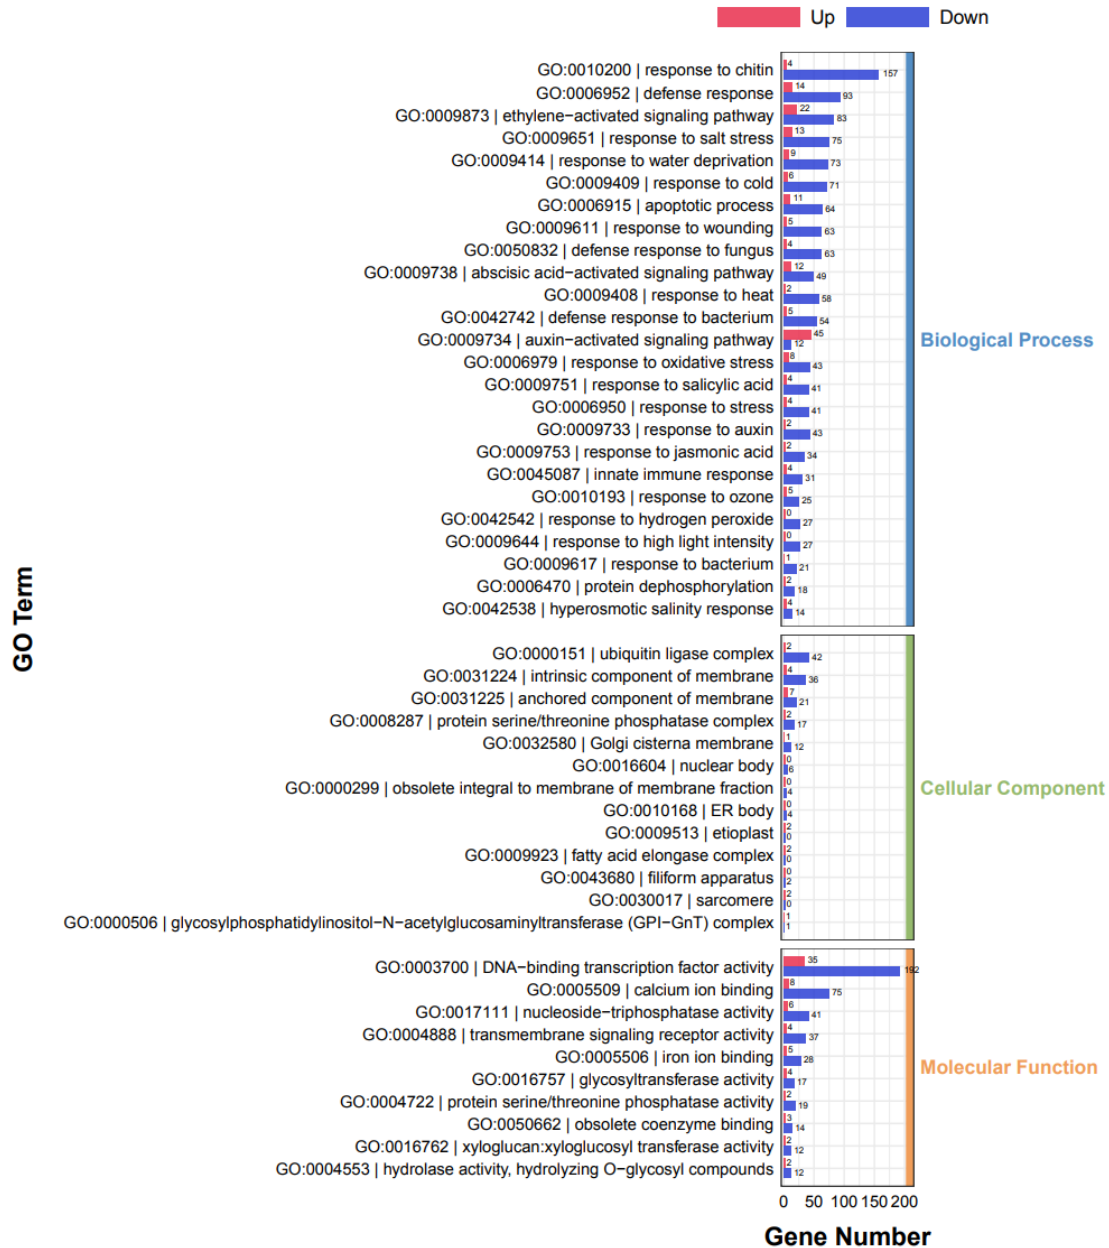

**Figure S2.** The GO enrichment analysis of DEGs between *MS* mutant and WT at 20 days after germination (DAG).

All significantly enriched GO terms ( $P$  value < 0.05) based on biological process, cellular component, and molecular function enriched from the DEGs between the *MS* mutant and WT at DAG20. Number of up- and down-regulated DEGs of enriched GO terms were shown. Complete data can be found in Table S2.

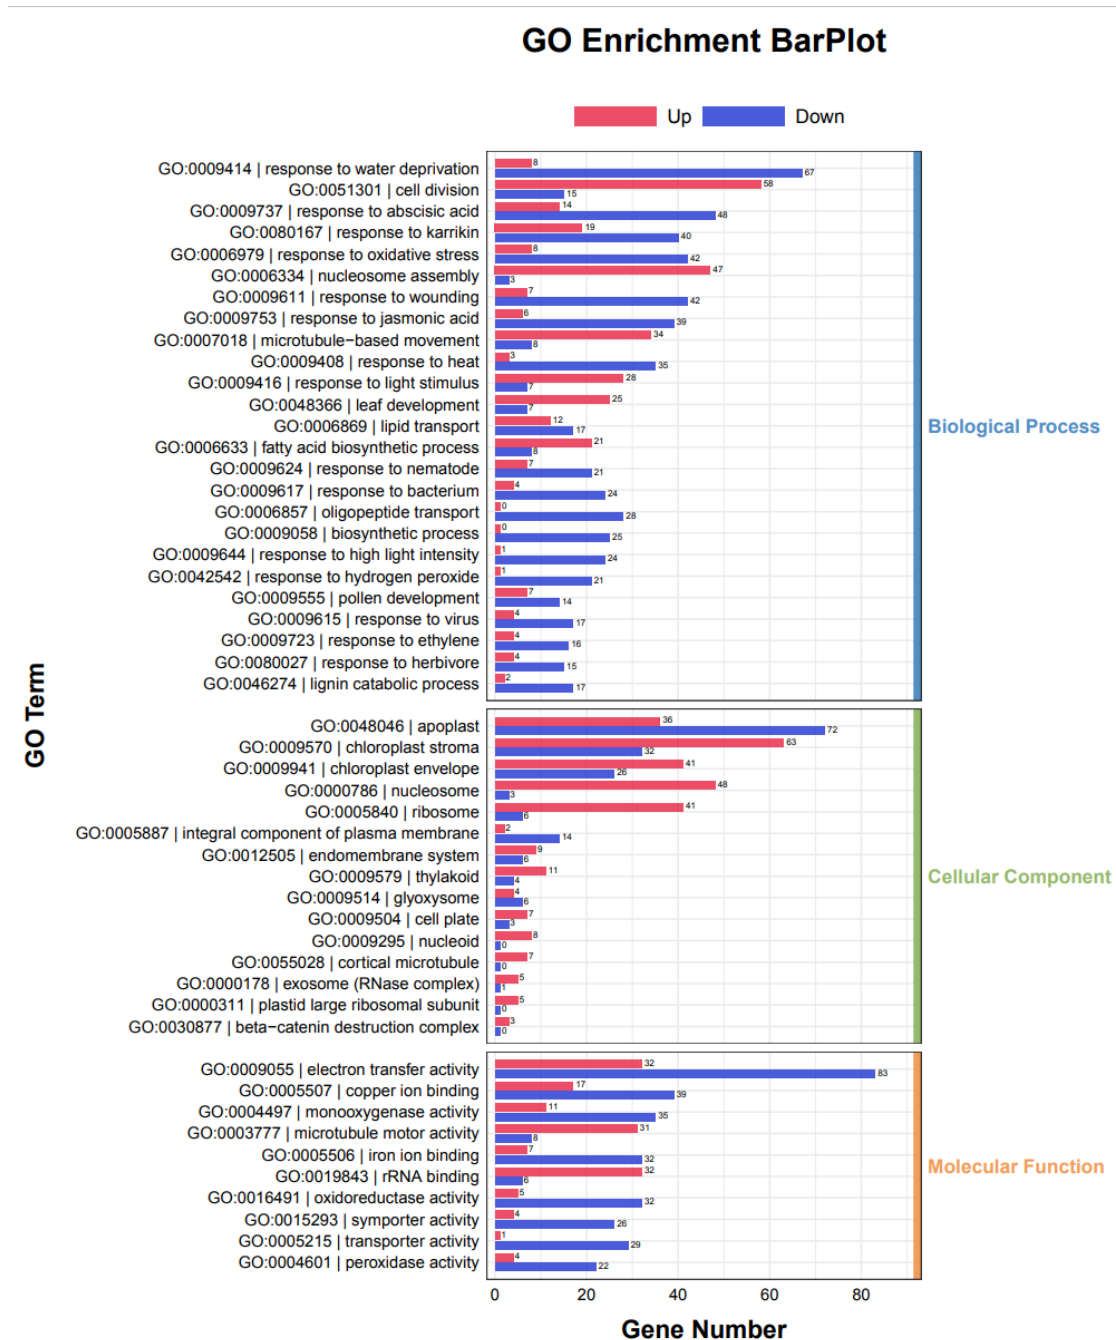

**Figure S3.** The GO enrichment analysis of DEGs between *MS* mutant and WT at 25 days after germination (DAG).

All significantly enriched GO terms ( $P$  value  $< 0.05$ ) based on biological process, cellular component, and molecular function enriched from the DEGs between the *MS* mutant and WT at DAG25. Number of up- and down-regulated DEGs of enriched GO terms were shown. Complete data can be found in Table S2.

## GO Enrichment BarPlot

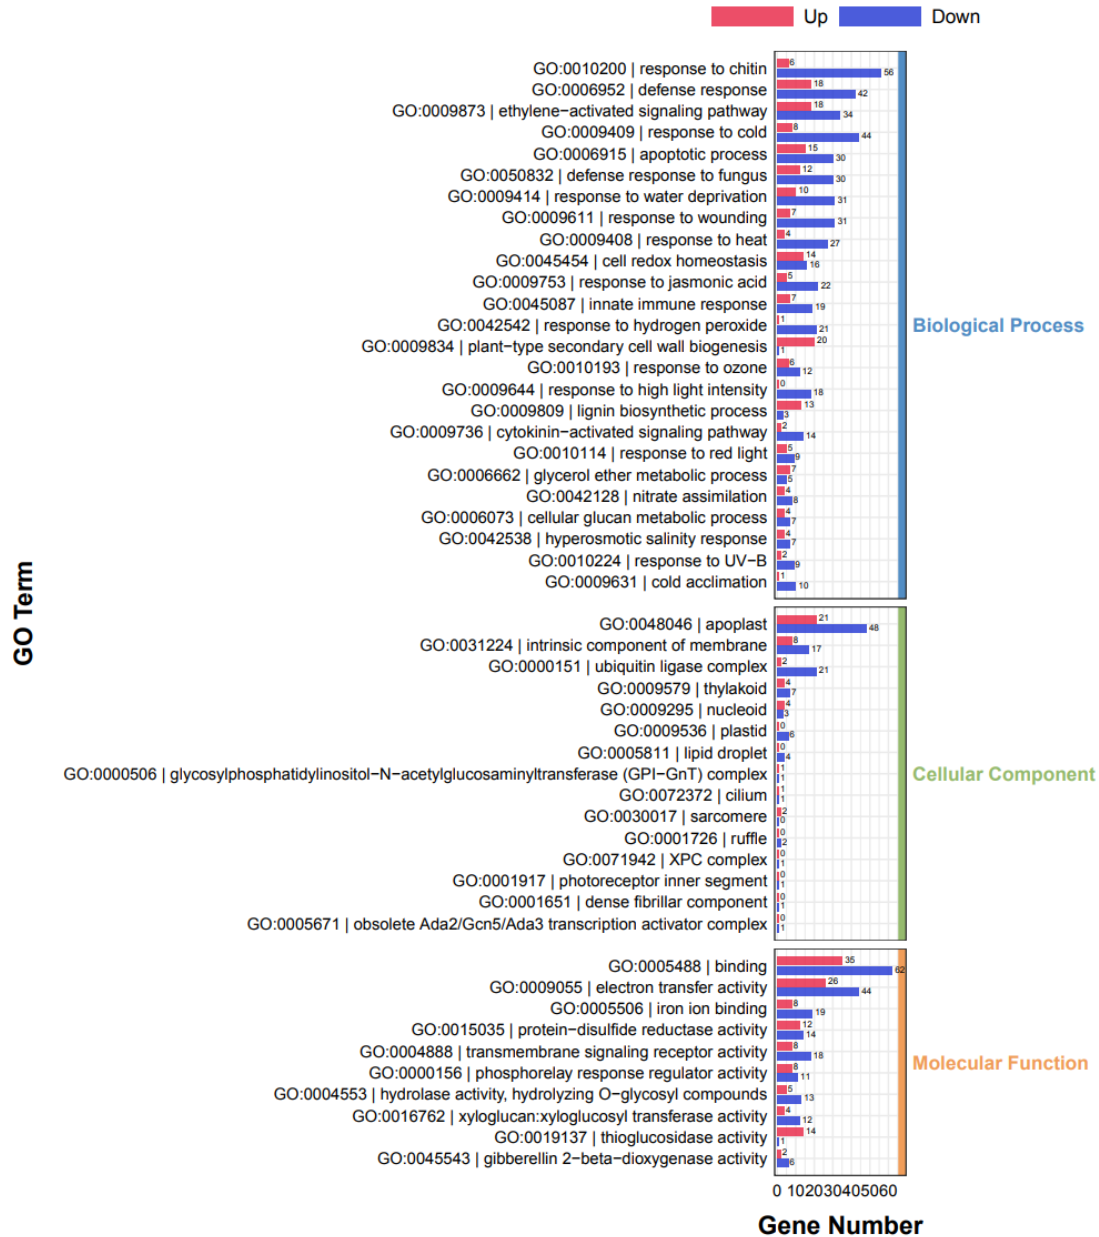

**Figure S4.** The GO enrichment analysis of DEGs between *MS* mutant and WT at 30 days after germination (DAG).

All significantly enriched GO terms ( $P$  value  $< 0.05$ ) based on biological process, cellular component, and molecular function enriched from the DEGs between the *MS* mutant and WT at DAG30. Number of up- and down-regulated DEGs of enriched GO terms were shown. Complete data can be found in Table S2.

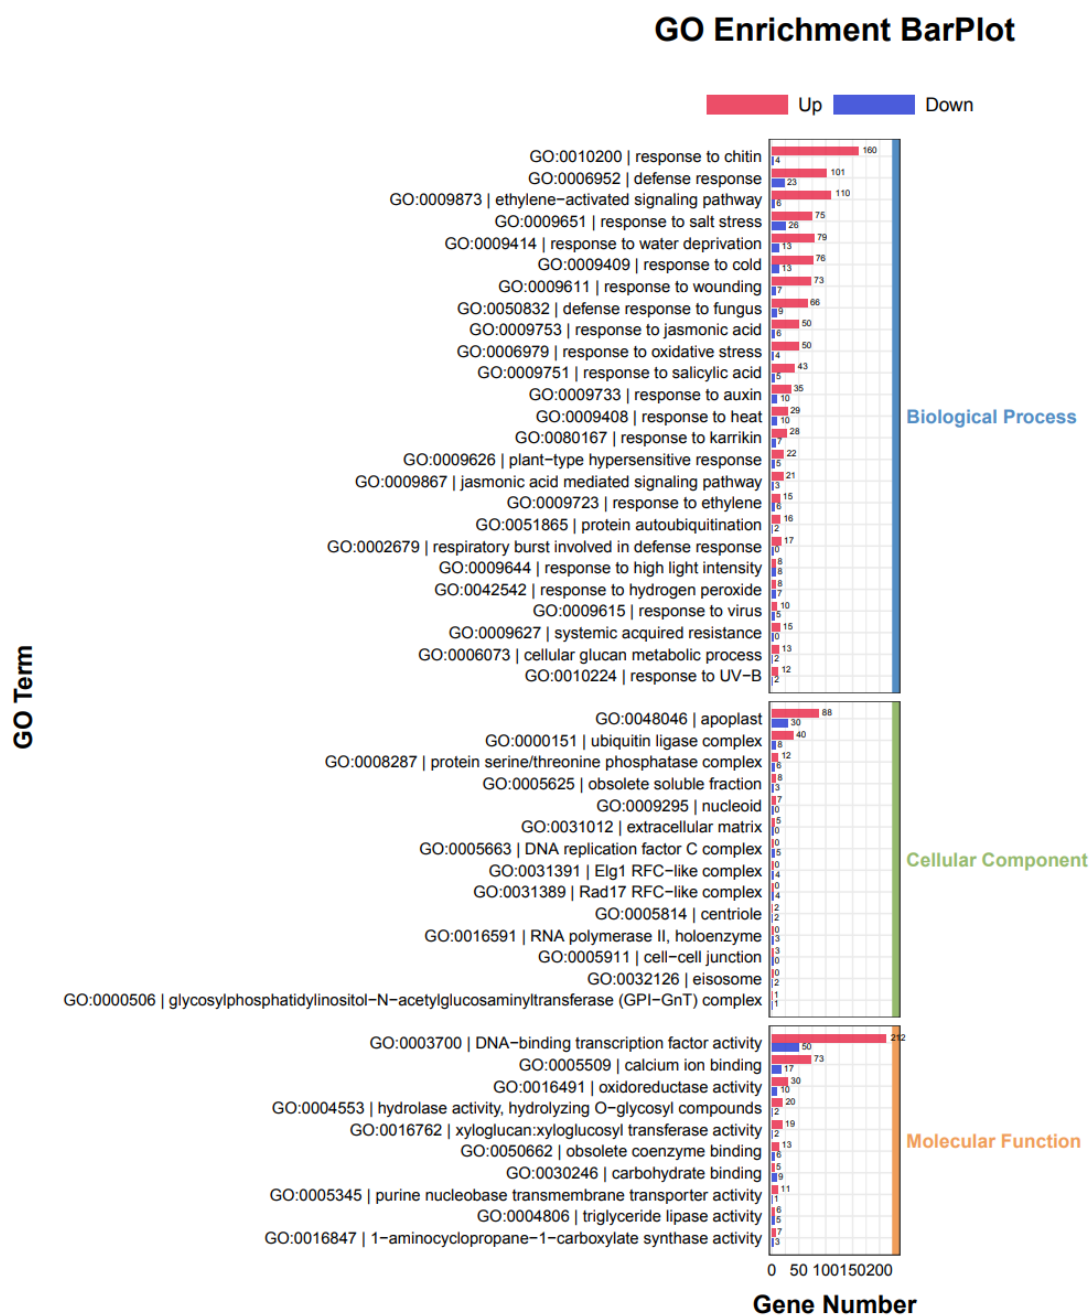

**Figure S5.** The GO enrichment analysis of DEGs between *MS* mutant and WT at 35 days after germination (DAG).

All significantly enriched GO terms ( $P$  value < 0.05) based on biological process, cellular component, and molecular function enriched from the DEGs between the *MS* mutant and WT at DAG35. Number of up- and down-regulated DEGs of enriched GO terms were shown. Complete data can be found in Table S2.
