# Supplementary material for: Cytokinin Signaling Are Required for Multi-Main Stems Development in <em>Brassica napus</em> L.
Source: Preprints.org preprint supplement (doi:10.20944/preprints202304.0586.v1), 2023-04-19
Supplement: Supplementary file 3 [file Table S2.xlsx]

## Sheet: MT vs ST-15
Supplemental Data 2. GO analysis of DEGs between MS mutant and WT at different DAG.
ST: Time after germination of single-stem plants (WT), MT: Time after germination of multi-stems (MS) mutants.
The significantly enrichened GO terms were selected by p value <0.05.
GO_ID	GO_Term	GO_Category	IDs	Rich.Factor	P.value	S_Up_ID	S_Up_Num	S_Down_ID	S_Down_Num	MapID_Count
GO:0005488	binding	Molecular Function	106400534|LOC106400534, 106366805|LOC106366805, 106365673|LOC106365673, 106400578|LOC106400578, 106447281|LOC106447281, 106451289|LOC106451289, 106453007|LOC106453007, 106346100|LOC106346100, 106366802|LOC106366802, 106453071|LOC106453071, 106375313|LOC106375313, 106349207|LOC106349207, 106447279|LOC106447279, 106398816|LOC106398816, 106387277|LOC106387277, 106451128|LOC106451128, 106452364|LOC10…	0.056	1.33313e-13	106400534|LOC106400534, 106365673|LOC106365673, 106400578|LOC106400578, 106447281|LOC106447281, 106451289|LOC106451289, 106453007|LOC106453007, 106346100|LOC106346100, 106447279|LOC106447279, 106387277|LOC106387277, 106399101|LOC106399101, 106402295|LOC106402295, 106351539|LOC106351539, 106447907|LOC106447907, 106453044|LOC106453044, 106438347|LOC106438347, 106386570|LOC106386570, 106407020|LOC10…	19	106366805|LOC106366805, 106366802|LOC106366802, 106453071|LOC106453071, 106375313|LOC106375313, 106349207|LOC106349207, 106398816|LOC106398816, 106451128|LOC106451128, 106452364|LOC106452364, 106366815|LOC106366815, 106383346|LOC106383346, 106416684|LOC106416684, 106453087|LOC106453087, 106367129|LOC106367129, 106447494|LOC106447494, 106386108|LOC106386108, 106451784|LOC106451784, 106412373|LOC10…	96	1718
GO:0003735	structural constituent of ribosome	Molecular Function	106376336|LOC106376336, 106433407|LOC106433407, 106400541|LOC106400541, 106372613|LOC106372613, 106390601|LOC106390601, 106365667|LOC106365667, 106365674|LOC106365674, 106433369|LOC106433369, 106366833|LOC106366833, 106397227|LOC106397227, 106445693|LOC106445693, 106354685|LOC106354685, 106369660|LOC106369660, 106362022|LOC106362022, 106400542|LOC106400542, 106345957|LOC106345957, 106398690|LOC10…	0.0369	0.0158375	106433407|LOC106433407, 106400541|LOC106400541, 106365667|LOC106365667, 106365674|LOC106365674, 106433369|LOC106433369, 106366833|LOC106366833, 106397227|LOC106397227, 106354685|LOC106354685, 106362022|LOC106362022, 106400542|LOC106400542, 106451134|LOC106451134, 106354529|LOC106354529, 106451400|LOC106451400, 106400581|LOC106400581, 106354500|LOC106354500, 106399381|LOC106399381, 106346115|LOC10…	25	106376336|LOC106376336, 106372613|LOC106372613, 106390601|LOC106390601, 106445693|LOC106445693, 106369660|LOC106369660, 106345957|LOC106345957, 106398690|LOC106398690, 106451044|LOC106451044, 106386629|LOC106386629, 106387996|LOC106387996, 106372477|LOC106372477, 106385303|LOC106385303, 106363404|LOC106363404, 106418691|LOC106418691, 106366033|LOC106366033, 106366814|LOC106366814, 106367635|LOC10…	25	1084
GO:0005506	iron ion binding	Molecular Function	106446394|LOC106446394, 106366810|LOC106366810, 106406326|LOC106406326, 106353868|LOC106353868, 106380862|LOC106380862, 106377836|LOC106377836, 106377834|LOC106377834, 106355888|LOC106355888, 106440879|LOC106440879, 106403712|LOC106403712, 106406196|LOC106406196, 106352821|LOC106352821, 106444436|LOC106444436, 106422857|LOC106422857, 106407713|LOC106407713, 106377835|LOC106377835, 106348481|LOC10…	0.0627	0.000176768	106444436|LOC106444436, 106422857|LOC106422857, 106370917|LOC106370917	3	106446394|LOC106446394, 106366810|LOC106366810, 106406326|LOC106406326, 106353868|LOC106353868, 106380862|LOC106380862, 106377836|LOC106377836, 106377834|LOC106377834, 106355888|LOC106355888, 106440879|LOC106440879, 106403712|LOC106403712, 106406196|LOC106406196, 106352821|LOC106352821, 106407713|LOC106407713, 106377835|LOC106377835, 106348481|LOC106348481, 106410653|LOC106410653, 106395025|LOC10…	20	293
GO:0015293	symporter activity	Molecular Function	106376952|LOC106376952, 106415591|LOC106415591, 106401302|LOC106401302, 106448347|LOC106448347, 106386755|LOC106386755, 106382402|LOC106382402, 106450979|LOC106450979, 106362183|LOC106362183, 106445601|LOC106445601, 106452236|LOC106452236, 106372486|LOC106372486, 106365948|LOC106365948, 106446384|LOC106446384, 106382915|LOC106382915, 106354584|LOC106354584, 106441225|LOC106441225, 106439986|LOC10…	0.0483	0.01286	106376952|LOC106376952, 106448347|LOC106448347, 106445601|LOC106445601, 106365948|LOC106365948, 106446384|LOC106446384, 106354584|LOC106354584, 106439986|LOC106439986	7	106415591|LOC106415591, 106401302|LOC106401302, 106386755|LOC106386755, 106382402|LOC106382402, 106450979|LOC106450979, 106362183|LOC106362183, 106452236|LOC106452236, 106372486|LOC106372486, 106382915|LOC106382915, 106441225|LOC106441225, 106400185|LOC106400185	11	258
GO:0004553	hydrolase activity, hydrolyzing O-glycosyl compounds	Molecular Function	106401646|LOC106401646, 106381804|LOC106381804, 106357861|LOC106357861, 106408546|LOC106408546, 106400096|LOC106400096, 106392232|LOC106392232, 106451493|LOC106451493, 106394469|LOC106394469, 106390181|LOC106390181, 106412123|LOC106412123, 106391591|LOC106391591, 106385619|LOC106385619, 106392059|LOC106392059, 106362420|LOC106362420, 106354576|LOC106354576, 106367120|LOC106367120, 106391891|LOC10…	0.1328	6.53301e-08	106401646|LOC106401646, 106381804|LOC106381804, 106357861|LOC106357861, 106408546|LOC106408546, 106392232|LOC106392232, 106394469|LOC106394469, 106390181|LOC106390181, 106412123|LOC106412123, 106391591|LOC106391591, 106385619|LOC106385619, 106392059|LOC106392059, 106362420|LOC106362420, 106354576|LOC106354576, 106367120|LOC106367120, 106391891|LOC106391891	15	106400096|LOC106400096, 106451493|LOC106451493	2	92
GO:0016762	xyloglucan:xyloglucosyl transferase activity	Molecular Function	106401646|LOC106401646, 106381804|LOC106381804, 106357861|LOC106357861, 106408546|LOC106408546, 106392232|LOC106392232, 106451493|LOC106451493, 106394469|LOC106394469, 106390181|LOC106390181, 106412123|LOC106412123, 106391591|LOC106391591, 106385619|LOC106385619, 106392059|LOC106392059, 106362420|LOC106362420, 106367120|LOC106367120, 106391891|LOC106391891	0.1389	2.11338e-07	106401646|LOC106401646, 106381804|LOC106381804, 106357861|LOC106357861, 106408546|LOC106408546, 106392232|LOC106392232, 106394469|LOC106394469, 106390181|LOC106390181, 106412123|LOC106412123, 106391591|LOC106391591, 106385619|LOC106385619, 106392059|LOC106392059, 106362420|LOC106362420, 106367120|LOC106367120, 106391891|LOC106391891	14	106451493|LOC106451493	1	77
GO:0015250	water channel activity	Molecular Function	106398710|LOC106398710, 106439438|LOC106439438, 106358144|LOC106358144, 106382572|LOC106382572, 106396462|LOC106396462, 106379070|LOC106379070, 106398717|LOC106398717, 106396434|LOC106396434, 106392601|LOC106392601, 106396224|LOC106396224, 106441065|LOC106441065, 106398753|LOC106398753	0.1644	5.38424e-07	106398710|LOC106398710, 106439438|LOC106439438, 106358144|LOC106358144, 106382572|LOC106382572, 106396462|LOC106396462, 106379070|LOC106379070, 106398717|LOC106398717, 106396434|LOC106396434, 106392601|LOC106392601, 106396224|LOC106396224, 106441065|LOC106441065, 106398753|LOC106398753	12		0	61
GO:0016165	linoleate 13S-lipoxygenase activity	Molecular Function	106406326|LOC106406326, 106353868|LOC106353868, 106380862|LOC106380862, 106377836|LOC106377836, 106377834|LOC106377834, 106355888|LOC106355888, 106403712|LOC106403712, 106352821|LOC106352821, 106377835|LOC106377835, 106410653|LOC106410653	0.2778	2.51634e-08		0	106406326|LOC106406326, 106353868|LOC106353868, 106380862|LOC106380862, 106377836|LOC106377836, 106377834|LOC106377834, 106355888|LOC106355888, 106403712|LOC106403712, 106352821|LOC106352821, 106377835|LOC106377835, 106410653|LOC106410653	10	32
GO:0015112	nitrate transmembrane transporter activity	Molecular Function	106376952|LOC106376952, 106415591|LOC106415591, 106401302|LOC106401302, 106382402|LOC106382402, 106362183|LOC106362183, 106445601|LOC106445601, 106446384|LOC106446384, 106439986|LOC106439986	0.1538	6.93186e-05	106376952|LOC106376952, 106445601|LOC106445601, 106446384|LOC106446384, 106439986|LOC106439986	4	106415591|LOC106415591, 106401302|LOC106401302, 106382402|LOC106382402, 106362183|LOC106362183	4	37
GO:0031625	ubiquitin protein ligase binding	Molecular Function	106356029|LOC106356029, 106382572|LOC106382572, 106401239|LOC106401239, 106351544|LOC106351544, 106353095|LOC106353095, 106379070|LOC106379070, 106388277|LOC106388277	0.0574	0.0465882	106356029|LOC106356029, 106382572|LOC106382572, 106401239|LOC106401239, 106351544|LOC106351544, 106353095|LOC106353095, 106379070|LOC106379070	6	106388277|LOC106388277	1	97
GO:0006412	translation	Biological Process	106376336|LOC106376336, 106433407|LOC106433407, 106400541|LOC106400541, 106372613|LOC106372613, 106390601|LOC106390601, 106365667|LOC106365667, 106365674|LOC106365674, 106433369|LOC106433369, 106366833|LOC106366833, 106397227|LOC106397227, 106445693|LOC106445693, 106354685|LOC106354685, 106369660|LOC106369660, 106362022|LOC106362022, 106400542|LOC106400542, 106345957|LOC106345957, 106398690|LOC10…	0.0365	0.0182814	106433407|LOC106433407, 106400541|LOC106400541, 106365667|LOC106365667, 106365674|LOC106365674, 106433369|LOC106433369, 106366833|LOC106366833, 106397227|LOC106397227, 106354685|LOC106354685, 106362022|LOC106362022, 106400542|LOC106400542, 106451134|LOC106451134, 106354529|LOC106354529, 106451400|LOC106451400, 106400581|LOC106400581, 106354500|LOC106354500, 106399381|LOC106399381, 106346115|LOC10…	25	106376336|LOC106376336, 106372613|LOC106372613, 106390601|LOC106390601, 106445693|LOC106445693, 106369660|LOC106369660, 106345957|LOC106345957, 106398690|LOC106398690, 106451044|LOC106451044, 106386629|LOC106386629, 106387996|LOC106387996, 106372477|LOC106372477, 106385303|LOC106385303, 106363404|LOC106363404, 106418691|LOC106418691, 106366033|LOC106366033, 106366814|LOC106366814, 106367635|LOC10…	25	1100
GO:0009737	response to abscisic acid	Biological Process	106398703|LOC106398703, 106398710|LOC106398710, 106453200|LOC106453200, 106354399|LOC106354399, 106446113|LOC106446113, 106397015|LOC106397015, 106385190|LOC106385190, 106402980|LOC106402980, 106382572|LOC106382572, 106396462|LOC106396462, 106377013|LOC106377013, 106450979|LOC106450979, 106356928|LOC106356928, 106345884|LOC106345884, 106385189|LOC106385189, 106450539|LOC106450539, 106416234|LOC10…	0.0379	0.0311261	106398710|LOC106398710, 106354399|LOC106354399, 106397015|LOC106397015, 106402980|LOC106402980, 106382572|LOC106382572, 106396462|LOC106396462, 106377013|LOC106377013, 106356928|LOC106356928, 106385189|LOC106385189, 106379070|LOC106379070, 106398717|LOC106398717, 106396434|LOC106396434, 106392601|LOC106392601, 106396224|LOC106396224, 106366127|LOC106366127, 106436584|LOC106436584, 106441065|LOC10…	21	106398703|LOC106398703, 106453200|LOC106453200, 106446113|LOC106446113, 106385190|LOC106385190, 106450979|LOC106450979, 106345884|LOC106345884, 106450539|LOC106450539, 106416234|LOC106416234, 106417365|LOC106417365, 106411521|LOC106411521, 106412609|LOC106412609, 106370572|LOC106370572	12	713
GO:0009414	response to water deprivation	Biological Process	106398710|LOC106398710, 106354399|LOC106354399, 106415591|LOC106415591, 106385519|LOC106385519, 106401302|LOC106401302, 106451127|LOC106451127, 106382212|LOC106382212, 106382572|LOC106382572, 106382402|LOC106382402, 106396462|LOC106396462, 106377013|LOC106377013, 106362183|LOC106362183, 106356928|LOC106356928, 106345884|LOC106345884, 106416234|LOC106416234, 106417365|LOC106417365, 106411521|LOC10…	0.0387	0.0288536	106398710|LOC106398710, 106354399|LOC106354399, 106451127|LOC106451127, 106382572|LOC106382572, 106396462|LOC106396462, 106377013|LOC106377013, 106356928|LOC106356928, 106379918|LOC106379918, 106379070|LOC106379070, 106398717|LOC106398717, 106396434|LOC106396434, 106392601|LOC106392601, 106396224|LOC106396224, 106441065|LOC106441065, 106398753|LOC106398753, 106396546|LOC106396546	16	106415591|LOC106415591, 106385519|LOC106385519, 106401302|LOC106401302, 106382212|LOC106382212, 106382402|LOC106382402, 106362183|LOC106362183, 106345884|LOC106345884, 106416234|LOC106416234, 106417365|LOC106417365, 106411521|LOC106411521, 106370572|LOC106370572, 106348456|LOC106348456, 106374420|LOC106374420, 106406812|LOC106406812, 106451054|LOC106451054	15	665
GO:0009611	response to wounding	Biological Process	106406326|LOC106406326, 106353868|LOC106353868, 106380862|LOC106380862, 106377836|LOC106377836, 106377834|LOC106377834, 106355888|LOC106355888, 106377353|LOC106377353, 106451864|LOC106451864, 106403712|LOC106403712, 106352539|LOC106352539, 106452206|LOC106452206, 106377835|LOC106377835, 106443622|LOC106443622, 106410653|LOC106410653, 106405993|LOC106405993, 106365245|LOC106365245, 106452309|LOC10…	0.0399	0.0436743	106377353|LOC106377353, 106451864|LOC106451864, 106352539|LOC106352539, 106407020|LOC106407020, 106407032|LOC106407032	5	106406326|LOC106406326, 106353868|LOC106353868, 106380862|LOC106380862, 106377836|LOC106377836, 106377834|LOC106377834, 106355888|LOC106355888, 106403712|LOC106403712, 106452206|LOC106452206, 106377835|LOC106377835, 106443622|LOC106443622, 106410653|LOC106410653, 106405993|LOC106405993, 106365245|LOC106365245, 106452309|LOC106452309, 106402654|LOC106402654, 106351119|LOC106351119, 106365244|LOC10…	17	429
GO:0080027	response to herbivore	Biological Process	106454060|LOC106454060, 106406326|LOC106406326, 106353868|LOC106353868, 106380862|LOC106380862, 106377836|LOC106377836, 106377834|LOC106377834, 106355888|LOC106355888, 106403712|LOC106403712, 106452809|LOC106452809, 106377835|LOC106377835, 106452810|LOC106452810, 106454059|LOC106454059, 106410653|LOC106410653, 106438996|LOC106438996, 106452131|LOC106452131	0.3191	8.36249e-13	106452131|LOC106452131	1	106454060|LOC106454060, 106406326|LOC106406326, 106353868|LOC106353868, 106380862|LOC106380862, 106377836|LOC106377836, 106377834|LOC106377834, 106355888|LOC106355888, 106403712|LOC106403712, 106452809|LOC106452809, 106377835|LOC106377835, 106452810|LOC106452810, 106454059|LOC106454059, 106410653|LOC106410653, 106438996|LOC106438996	14	42
GO:0009617	response to bacterium	Biological Process	106406326|LOC106406326, 106353868|LOC106353868, 106380862|LOC106380862, 106377836|LOC106377836, 106377834|LOC106377834, 106355888|LOC106355888, 106354802|LOC106354802, 106403712|LOC106403712, 106377835|LOC106377835, 106372476|LOC106372476, 106401239|LOC106401239, 106410653|LOC106410653, 106351544|LOC106351544, 106353095|LOC106353095, 106364045|LOC106364045	0.0904	4.54856e-05	106354802|LOC106354802, 106401239|LOC106401239, 106351544|LOC106351544, 106353095|LOC106353095	4	106406326|LOC106406326, 106353868|LOC106353868, 106380862|LOC106380862, 106377836|LOC106377836, 106377834|LOC106377834, 106355888|LOC106355888, 106403712|LOC106403712, 106377835|LOC106377835, 106372476|LOC106372476, 106410653|LOC106410653, 106364045|LOC106364045	11	129
GO:0009585	red, far-red light phototransduction	Biological Process	106381822|LOC106381822, 106363636|LOC106363636, 106399222|LOC106399222, 106454592|LOC106454592, 106357106|LOC106357106, 106345289|LOC106345289, 106438048|LOC106438048, 106346484|LOC106346484, 106439932|LOC106439932, 106372421|LOC106372421, 106448095|LOC106448095, 106399325|LOC106399325, 106409629|LOC106409629	0.0684	0.00198203	106345289|LOC106345289, 106346484|LOC106346484, 106439932|LOC106439932, 106372421|LOC106372421	4	106381822|LOC106381822, 106363636|LOC106363636, 106399222|LOC106399222, 106454592|LOC106454592, 106357106|LOC106357106, 106438048|LOC106438048, 106448095|LOC106448095, 106399325|LOC106399325, 106409629|LOC106409629	9	154
GO:0010193	response to ozone	Biological Process	106445304|LOC106445304, 106397390|LOC106397390, 106386565|LOC106386565, 106445300|LOC106445300, 106386568|LOC106386568, 106369968|LOC106369968, 106390230|LOC106390230, 106445295|LOC106445295, 106445298|LOC106445298, 106454015|LOC106454015, 106395293|LOC106395293, 106385411|LOC106385411, 106445551|LOC106445551	0.0487	0.0292616	106445304|LOC106445304, 106397390|LOC106397390, 106386565|LOC106386565, 106445300|LOC106445300, 106386568|LOC106386568, 106369968|LOC106369968, 106445295|LOC106445295, 106445298|LOC106445298, 106385411|LOC106385411	9	106390230|LOC106390230, 106454015|LOC106454015, 106395293|LOC106395293, 106445551|LOC106445551	4	207
GO:0006857	oligopeptide transport	Biological Process	106371093|LOC106371093, 106395734|LOC106395734, 106376952|LOC106376952, 106415591|LOC106415591, 106401302|LOC106401302, 106452225|LOC106452225, 106382402|LOC106382402, 106362183|LOC106362183, 106445601|LOC106445601, 106446384|LOC106446384, 106407102|LOC106407102, 106439986|LOC106439986	0.0519	0.0229298	106376952|LOC106376952, 106445601|LOC106445601, 106446384|LOC106446384, 106439986|LOC106439986	4	106371093|LOC106371093, 106395734|LOC106395734, 106415591|LOC106415591, 106401302|LOC106401302, 106452225|LOC106452225, 106382402|LOC106382402, 106362183|LOC106362183, 106407102|LOC106407102	8	178
GO:0009620	response to fungus	Biological Process	106381497|LOC106381497, 106406326|LOC106406326, 106353868|LOC106353868, 106380862|LOC106380862, 106377836|LOC106377836, 106377834|LOC106377834, 106355888|LOC106355888, 106354802|LOC106354802, 106403712|LOC106403712, 106377835|LOC106377835, 106410653|LOC106410653	0.1429	6.57672e-06	106381497|LOC106381497, 106354802|LOC106354802	2	106406326|LOC106406326, 106353868|LOC106353868, 106380862|LOC106380862, 106377836|LOC106377836, 106377834|LOC106377834, 106355888|LOC106355888, 106403712|LOC106403712, 106377835|LOC106377835, 106410653|LOC106410653	9	58
GO:0006073	cellular glucan metabolic process	Biological Process	106401646|LOC106401646, 106381804|LOC106381804, 106357861|LOC106357861, 106451493|LOC106451493, 106390181|LOC106390181, 106412123|LOC106412123, 106391591|LOC106391591, 106392059|LOC106392059, 106362420|LOC106362420, 106367120|LOC106367120, 106391891|LOC106391891	0.1209	3.31137e-05	106401646|LOC106401646, 106381804|LOC106381804, 106357861|LOC106357861, 106390181|LOC106390181, 106412123|LOC106412123, 106391591|LOC106391591, 106392059|LOC106392059, 106362420|LOC106362420, 106367120|LOC106367120, 106391891|LOC106391891	10	106451493|LOC106451493	1	67
GO:0009615	response to virus	Biological Process	106354526|LOC106354526, 106356004|LOC106356004, 106369087|LOC106369087, 106381700|LOC106381700, 106452809|LOC106452809, 106452810|LOC106452810, 106401239|LOC106401239, 106351544|LOC106351544, 106353095|LOC106353095, 106438996|LOC106438996, 106392211|LOC106392211	0.0724	0.00277303	106354526|LOC106354526, 106356004|LOC106356004, 106401239|LOC106401239, 106351544|LOC106351544, 106353095|LOC106353095	5	106369087|LOC106369087, 106381700|LOC106381700, 106452809|LOC106452809, 106452810|LOC106452810, 106438996|LOC106438996, 106392211|LOC106392211	6	116
GO:0042128	nitrate assimilation	Biological Process	106354597|LOC106354597, 106376952|LOC106376952, 106415591|LOC106415591, 106401302|LOC106401302, 106382402|LOC106382402, 106362183|LOC106362183, 106445601|LOC106445601, 106446384|LOC106446384, 106362058|LOC106362058, 106439986|LOC106439986, 106397776|LOC106397776	0.0588	0.0126189	106354597|LOC106354597, 106376952|LOC106376952, 106445601|LOC106445601, 106446384|LOC106446384, 106439986|LOC106439986, 106397776|LOC106397776	6	106415591|LOC106415591, 106401302|LOC106401302, 106382402|LOC106382402, 106362183|LOC106362183, 106362058|LOC106362058	5	146
GO:0048511	rhythmic process	Biological Process	106396525|LOC106396525, 106441062|LOC106441062, 106399222|LOC106399222, 106347962|LOC106347962, 106454592|LOC106454592, 106392662|LOC106392662, 106438048|LOC106438048, 106348078|LOC106348078, 106399325|LOC106399325, 106379437|LOC106379437	0.098	0.000426878	106348078|LOC106348078	1	106396525|LOC106396525, 106441062|LOC106441062, 106399222|LOC106399222, 106347962|LOC106347962, 106454592|LOC106454592, 106392662|LOC106392662, 106438048|LOC106438048, 106399325|LOC106399325, 106379437|LOC106379437	9	80
GO:0009644	response to high light intensity	Biological Process	106451821|LOC106451821, 106401239|LOC106401239, 106351544|LOC106351544, 106417036|LOC106417036, 106438387|LOC106438387, 106353095|LOC106353095, 106438385|LOC106438385, 106377322|LOC106377322, 106416798|LOC106416798, 106407032|LOC106407032	0.0637	0.0101284	106401239|LOC106401239, 106351544|LOC106351544, 106438387|LOC106438387, 106353095|LOC106353095, 106438385|LOC106438385, 106377322|LOC106377322, 106407032|LOC106407032	7	106451821|LOC106451821, 106417036|LOC106417036, 106416798|LOC106416798	3	130
GO:0009695	jasmonic acid biosynthetic process	Biological Process	106406326|LOC106406326, 106353868|LOC106353868, 106380862|LOC106380862, 106377836|LOC106377836, 106377834|LOC106377834, 106355888|LOC106355888, 106403712|LOC106403712, 106377835|LOC106377835, 106410653|LOC106410653	0.1233	0.000145729		0	106406326|LOC106406326, 106353868|LOC106353868, 106380862|LOC106380862, 106377836|LOC106377836, 106377834|LOC106377834, 106355888|LOC106355888, 106403712|LOC106403712, 106377835|LOC106377835, 106410653|LOC106410653	9	66
GO:0009627	systemic acquired resistance	Biological Process	106354526|LOC106354526, 106356004|LOC106356004, 106369087|LOC106369087, 106410962|LOC106410962, 106452809|LOC106452809, 106452810|LOC106452810, 106438996|LOC106438996, 106412264|LOC106412264, 106353239|LOC106353239	0.0638	0.0141078	106354526|LOC106354526, 106356004|LOC106356004	2	106369087|LOC106369087, 106410962|LOC106410962, 106452809|LOC106452809, 106452810|LOC106452810, 106438996|LOC106438996, 106412264|LOC106412264, 106353239|LOC106353239	7	102
GO:0006662	glycerol ether metabolic process	Biological Process	106453218|LOC106453218, 106366804|LOC106366804, 106451283|LOC106451283, 106443160|LOC106443160, 106346112|LOC106346112, 106387275|LOC106387275, 106400536|LOC106400536, 106400535|LOC106400535, 106370307|LOC106370307	0.0542	0.03574	106451283|LOC106451283, 106443160|LOC106443160, 106346112|LOC106346112, 106387275|LOC106387275, 106400536|LOC106400536, 106400535|LOC106400535	6	106453218|LOC106453218, 106366804|LOC106366804, 106370307|LOC106370307	3	136
GO:0010167	response to nitrate	Biological Process	106376952|LOC106376952, 106415591|LOC106415591, 106401302|LOC106401302, 106382402|LOC106382402, 106362183|LOC106362183, 106445601|LOC106445601, 106446384|LOC106446384, 106439986|LOC106439986	0.1212	0.000380167	106376952|LOC106376952, 106445601|LOC106445601, 106446384|LOC106446384, 106439986|LOC106439986	4	106415591|LOC106415591, 106401302|LOC106401302, 106382402|LOC106382402, 106362183|LOC106362183	4	49
GO:0009740	gibberellic acid mediated signaling pathway	Biological Process	106453025|LOC106453025, 106354788|LOC106354788, 106453059|LOC106453059, 106363636|LOC106363636, 106450539|LOC106450539, 106357106|LOC106357106, 106372421|LOC106372421, 106409629|LOC106409629	0.0645	0.0188989	106453025|LOC106453025, 106354788|LOC106354788, 106372421|LOC106372421	3	106453059|LOC106453059, 106363636|LOC106363636, 106450539|LOC106450539, 106357106|LOC106357106, 106409629|LOC106409629	5	106
GO:0042542	response to hydrogen peroxide	Biological Process	106401239|LOC106401239, 106351544|LOC106351544, 106417036|LOC106417036, 106438387|LOC106438387, 106353095|LOC106353095, 106438385|LOC106438385, 106377322|LOC106377322, 106416798|LOC106416798	0.0552	0.042306	106401239|LOC106401239, 106351544|LOC106351544, 106438387|LOC106438387, 106353095|LOC106353095, 106438385|LOC106438385, 106377322|LOC106377322	6	106417036|LOC106417036, 106416798|LOC106416798	2	123
GO:0080156	mitochondrial mRNA modification	Biological Process	106452369|LOC106452369, 106400043|LOC106400043, 106368779|LOC106368779, 106412542|LOC106412542, 106354400|LOC106354400, 106404445|LOC106404445, 106383884|LOC106383884	0.3333	8.23357e-07		0	106452369|LOC106452369, 106400043|LOC106400043, 106368779|LOC106368779, 106412542|LOC106412542, 106354400|LOC106354400, 106404445|LOC106404445, 106383884|LOC106383884	7	19
GO:0032196	transposition	Biological Process	106363247|LOC106363247, 106363248|LOC106363248, 106362628|LOC106362628, 106407325|LOC106407325, 106444905|LOC106444905, 106381062|LOC106381062	0.0706	0.0268846	106363247|LOC106363247, 106363248|LOC106363248, 106362628|LOC106362628, 106407325|LOC106407325, 106444905|LOC106444905, 106381062|LOC106381062	6		0	35
GO:0001525	angiogenesis	Biological Process	106371986|LOC106371986, 106371955|LOC106371955, 106365664|LOC106365664, 106441506|LOC106441506, 106365663|LOC106365663	0.1852	0.000680747	106365664|LOC106365664, 106441506|LOC106441506, 106365663|LOC106365663	3	106371986|LOC106371986, 106371955|LOC106371955	2	21
GO:0042343	indole glucosinolate metabolic process	Biological Process	106390964|LOC106390964, 106391585|LOC106391585, 106394102|LOC106394102, 106361410|LOC106361410, 106395191|LOC106395191	0.1515	0.00175222		0	106390964|LOC106390964, 106391585|LOC106391585, 106394102|LOC106394102, 106361410|LOC106361410, 106395191|LOC106395191	5	25
GO:0005618	cell wall	Cellular Component	106354691|LOC106354691, 106443096|LOC106443096, 106447116|LOC106447116, 106398690|LOC106398690, 106386931|LOC106386931, 106354526|LOC106354526, 106354680|LOC106354680, 106453034|LOC106453034, 106354681|LOC106354681, 106438778|LOC106438778, 106356004|LOC106356004, 106450784|LOC106450784, 106452368|LOC106452368, 106438075|LOC106438075, 106349206|LOC106349206, 106415469|LOC106415469, 106369087|LOC10…	0.0363	0.0109269	106354691|LOC106354691, 106447116|LOC106447116, 106354526|LOC106354526, 106354680|LOC106354680, 106453034|LOC106453034, 106354681|LOC106354681, 106438778|LOC106438778, 106356004|LOC106356004, 106438075|LOC106438075, 106401646|LOC106401646, 106351539|LOC106351539, 106381804|LOC106381804, 106357861|LOC106357861, 106388165|LOC106388165, 106402980|LOC106402980, 106407604|LOC106407604, 106392232|LOC10…	31	106443096|LOC106443096, 106398690|LOC106398690, 106386931|LOC106386931, 106450784|LOC106450784, 106452368|LOC106452368, 106349206|LOC106349206, 106415469|LOC106415469, 106369087|LOC106369087, 106354550|LOC106354550, 106410962|LOC106410962, 106396384|LOC106396384, 106345263|LOC106345263, 106443622|LOC106443622, 106451493|LOC106451493, 106345884|LOC106345884, 106350284|LOC106350284, 106347962|LOC10…	31	1235
GO:0048046	apoplast	Cellular Component	106453029|LOC106453029, 106451049|LOC106451049, 106354526|LOC106354526, 106446093|LOC106446093, 106386759|LOC106386759, 106356004|LOC106356004, 106452368|LOC106452368, 106366310|LOC106366310, 106438075|LOC106438075, 106453054|LOC106453054, 106441544|LOC106441544, 106369087|LOC106369087, 106401646|LOC106401646, 106371587|LOC106371587, 106381804|LOC106381804, 106357861|LOC106357861, 106410962|LOC10…	0.0467	3.49526e-05	106453029|LOC106453029, 106354526|LOC106354526, 106356004|LOC106356004, 106438075|LOC106438075, 106441544|LOC106441544, 106401646|LOC106401646, 106381804|LOC106381804, 106357861|LOC106357861, 106440617|LOC106440617, 106389874|LOC106389874, 106451769|LOC106451769, 106408546|LOC106408546, 106392232|LOC106392232, 106390921|LOC106390921, 106389887|LOC106389887, 106394469|LOC106394469, 106380526|LOC10…	29	106451049|LOC106451049, 106446093|LOC106446093, 106386759|LOC106386759, 106452368|LOC106452368, 106366310|LOC106366310, 106453054|LOC106453054, 106369087|LOC106369087, 106371587|LOC106371587, 106410962|LOC106410962, 106351540|LOC106351540, 106369684|LOC106369684, 106400096|LOC106400096, 106377554|LOC106377554, 106451493|LOC106451493, 106345884|LOC106345884, 106347962|LOC106347962, 106356122|LOC10…	30	960
GO:0009941	chloroplast envelope	Cellular Component	106398703|LOC106398703, 106381763|LOC106381763, 106406326|LOC106406326, 106353868|LOC106353868, 106354529|LOC106354529, 106380862|LOC106380862, 106377836|LOC106377836, 106377834|LOC106377834, 106397576|LOC106397576, 106355888|LOC106355888, 106438778|LOC106438778, 106452368|LOC106452368, 106354500|LOC106354500, 106371989|LOC106371989, 106438075|LOC106438075, 106441544|LOC106441544, 106440437|LOC10…	0.038	0.026126	106381763|LOC106381763, 106354529|LOC106354529, 106397576|LOC106397576, 106438778|LOC106438778, 106354500|LOC106354500, 106438075|LOC106438075, 106441544|LOC106441544, 106440437|LOC106440437, 106439438|LOC106439438, 106451656|LOC106451656, 106354395|LOC106354395, 106358144|LOC106358144, 106390921|LOC106390921, 106445128|LOC106445128, 106381762|LOC106381762, 106380526|LOC106380526, 106400603|LOC10…	18	106398703|LOC106398703, 106406326|LOC106406326, 106353868|LOC106353868, 106380862|LOC106380862, 106377836|LOC106377836, 106377834|LOC106377834, 106355888|LOC106355888, 106452368|LOC106452368, 106371989|LOC106371989, 106403712|LOC106403712, 106377835|LOC106377835, 106410653|LOC106410653, 106404576|LOC106404576, 106390310|LOC106390310, 106442139|LOC106442139, 106367027|LOC106367027, 106402945|LOC10…	17	760
GO:0009505	plant-type cell wall	Cellular Component	106453200|LOC106453200, 106366828|LOC106366828, 106366310|LOC106366310, 106439438|LOC106439438, 106354604|LOC106354604, 106440617|LOC106440617, 106358144|LOC106358144, 106418533|LOC106418533, 106389874|LOC106389874, 106408546|LOC106408546, 106400096|LOC106400096, 106358273|LOC106358273, 106407044|LOC106407044, 106389887|LOC106389887, 106414640|LOC106414640, 106390181|LOC106390181, 106391591|LOC10…	0.0419	0.0118767	106366828|LOC106366828, 106439438|LOC106439438, 106354604|LOC106354604, 106440617|LOC106440617, 106358144|LOC106358144, 106418533|LOC106418533, 106389874|LOC106389874, 106408546|LOC106408546, 106358273|LOC106358273, 106407044|LOC106407044, 106389887|LOC106389887, 106390181|LOC106390181, 106391591|LOC106391591, 106446062|LOC106446062, 106385619|LOC106385619, 106392059|LOC106392059, 106354576|LOC10…	21	106453200|LOC106453200, 106366310|LOC106366310, 106400096|LOC106400096, 106414640|LOC106414640, 106360718|LOC106360718, 106367247|LOC106367247, 106440419|LOC106440419, 106395967|LOC106395967, 106379410|LOC106379410	9	525
GO:0022625	cytosolic large ribosomal subunit	Cellular Component	106376336|LOC106376336, 106400541|LOC106400541, 106365667|LOC106365667, 106366833|LOC106366833, 106397227|LOC106397227, 106369660|LOC106369660, 106362022|LOC106362022, 106400542|LOC106400542, 106451044|LOC106451044, 106366033|LOC106366033, 106345633|LOC106345633, 106399381|LOC106399381, 106346115|LOC106346115, 106402124|LOC106402124, 106370721|LOC106370721, 106397170|LOC106397170, 106357342|LOC10…	0.0411	0.0371818	106400541|LOC106400541, 106365667|LOC106365667, 106366833|LOC106366833, 106397227|LOC106397227, 106362022|LOC106362022, 106400542|LOC106400542, 106399381|LOC106399381, 106346115|LOC106346115, 106402124|LOC106402124, 106397170|LOC106397170, 106357342|LOC106357342, 106360174|LOC106360174, 106449191|LOC106449191, 106399380|LOC106399380	14	106376336|LOC106376336, 106369660|LOC106369660, 106451044|LOC106451044, 106366033|LOC106366033, 106345633|LOC106345633, 106370721|LOC106370721, 106404586|LOC106404586	7	437
GO:0022627	cytosolic small ribosomal subunit	Cellular Component	106372613|LOC106372613, 106390601|LOC106390601, 106365674|LOC106365674, 106433369|LOC106433369, 106445693|LOC106445693, 106345957|LOC106345957, 106398690|LOC106398690, 106387996|LOC106387996, 106372477|LOC106372477, 106451400|LOC106451400, 106415469|LOC106415469, 106368244|LOC106368244, 106368211|LOC106368211, 106406840|LOC106406840, 106380112|LOC106380112, 106454868|LOC106454868	0.0453	0.0302601	106365674|LOC106365674, 106433369|LOC106433369, 106451400|LOC106451400, 106368244|LOC106368244, 106454868|LOC106454868	5	106372613|LOC106372613, 106390601|LOC106390601, 106445693|LOC106445693, 106345957|LOC106345957, 106398690|LOC106398690, 106387996|LOC106387996, 106372477|LOC106372477, 106415469|LOC106415469, 106368211|LOC106368211, 106406840|LOC106406840, 106380112|LOC106380112	11	296
GO:0031225	anchored component of membrane	Cellular Component	106381973|LOC106381973, 106351695|LOC106351695, 106400580|LOC106400580, 106443661|LOC106443661, 106452286|LOC106452286, 106389874|LOC106389874, 106388887|LOC106388887, 106389887|LOC106389887, 106386021|LOC106386021, 106361254|LOC106361254, 106382827|LOC106382827, 106367247|LOC106367247, 106440419|LOC106440419	0.0461	0.0423606	106381973|LOC106381973, 106351695|LOC106351695, 106400580|LOC106400580, 106443661|LOC106443661, 106452286|LOC106452286, 106389874|LOC106389874, 106389887|LOC106389887, 106386021|LOC106386021, 106361254|LOC106361254	9	106388887|LOC106388887, 106382827|LOC106382827, 106367247|LOC106367247, 106440419|LOC106440419	4	210
GO:0009514	glyoxysome	Cellular Component	106349686|LOC106349686, 106401486|LOC106401486, 106375313|LOC106375313, 106348746|LOC106348746, 106397390|LOC106397390, 106413451|LOC106413451	0.0882	0.00982229	106349686|LOC106349686, 106401486|LOC106401486, 106397390|LOC106397390	3	106375313|LOC106375313, 106348746|LOC106348746, 106413451|LOC106413451	3	52
GO:0005625	obsolete soluble fraction	Cellular Component	106352877|LOC106352877, 106451608|LOC106451608, 106441506|LOC106441506, 106382264|LOC106382264, 106365663|LOC106365663, 106379891|LOC106379891	0.0741	0.0217987	106352877|LOC106352877, 106441506|LOC106441506, 106365663|LOC106365663	3	106451608|LOC106451608, 106382264|LOC106382264, 106379891|LOC106379891	3	66
GO:0009295	nucleoid	Cellular Component	106346112|LOC106346112, 106400536|LOC106400536, 106400535|LOC106400535, 106390921|LOC106390921, 106345298|LOC106345298	0.1724	0.000957927	106346112|LOC106346112, 106400536|LOC106400536, 106400535|LOC106400535, 106390921|LOC106390921, 106345298|LOC106345298	5		0	24
GO:0009530	primary cell wall	Cellular Component	106352980|LOC106352980, 106353495|LOC106353495, 106386159|LOC106386159	0.125	0.0256199		0	106352980|LOC106352980, 106353495|LOC106353495, 106386159|LOC106386159	3	19
GO:0000506	glycosylphosphatidylinositol-N-acetylglucosaminyltransferase (GPI-GnT) complex	Cellular Component	106370718|LOC106370718, 106372585|LOC106372585	0.5	0.00416212	106372585|LOC106372585	1	106370718|LOC106370718	1	2
GO:0000837	Doa10p ubiquitin ligase complex	Cellular Component	106397237|LOC106397237, 106452985|LOC106452985	0.3333	0.010039	106397237|LOC106397237	1	106452985|LOC106452985	1	6
GO:0030017	sarcomere	Cellular Component	106433437|LOC106433437, 106408069|LOC106408069	0.2857	0.0138059	106433437|LOC106433437, 106408069|LOC106408069	2		0	5
GO:0072372	cilium	Cellular Component	106387291|LOC106387291, 106380602|LOC106380602	0.25	0.0180829	106387291|LOC106387291, 106380602|LOC106380602	2		0	8

## Sheet: MT vs ST-20
Supplemental Data 2. GO analysis of DEGs between MS mutant and WT at different DAG.
ST: Time after germination of single-stem plants (WT), MT: Time after germination of multi-stems (MS) mutants.
The significantly enrichened GO terms were selected by p value <0.05.
GO_ID	GO_Term	GO_Category	IDs	Rich.Factor	P.value	S_Up_ID	S_Up_Num	S_Down_ID	S_Down_Num	MapID_Count
GO:0003700	DNA-binding transcription factor activity	Molecular Function	106409024|LOC106409024, 106375664|LOC106375664, 106359462|LOC106359462, 106416616|LOC106416616, 106449056|LOC106449056, 106397734|LOC106397734, 106404606|LOC106404606, 106354746|LOC106354746, 106411324|LOC106411324, 106394550|LOC106394550, 106439403|LOC106439403, 106427808|LOC106427808, 106382776|LOC106382776, 106348866|LOC106348866, 106390639|LOC106390639, 106374324|LOC106374324, 106372529|LOC10…	0.0689	2.45101e-06	106346114|LOC106346114, 106451410|LOC106451410, 106379059|LOC106379059, 106446070|LOC106446070, 106390673|LOC106390673, 106454869|LOC106454869, 106451376|LOC106451376, 106382001|LOC106382001, 106444055|LOC106444055, 106366302|LOC106366302, 106398632|LOC106398632, 106436451|LOC106436451, 106369717|LOC106369717, 106366080|LOC106366080, 106401605|LOC106401605, 106358595|LOC106358595, 106449379|LOC10…	35	106409024|LOC106409024, 106375664|LOC106375664, 106359462|LOC106359462, 106416616|LOC106416616, 106449056|LOC106449056, 106397734|LOC106397734, 106404606|LOC106404606, 106354746|LOC106354746, 106411324|LOC106411324, 106394550|LOC106394550, 106439403|LOC106439403, 106427808|LOC106427808, 106382776|LOC106382776, 106348866|LOC106348866, 106390639|LOC106390639, 106374324|LOC106374324, 106372529|LOC10…	192	2564
GO:0005509	calcium ion binding	Molecular Function	106449566|LOC106449566, 106376088|LOC106376088, 106371121|LOC106371121, 106357116|LOC106357116, 106375897|LOC106375897, 106399334|LOC106399334, 106390102|LOC106390102, 106407133|LOC106407133, 106408214|LOC106408214, 106351956|LOC106351956, 106410758|LOC106410758, 106408965|LOC106408965, 106413314|LOC106413314, 106348958|LOC106348958, 106368206|LOC106368206, 106415996|LOC106415996, 106356945|LOC10…	0.0917	2.41821e-07	106389588|LOC106389588, 106372340|LOC106372340, 106387397|LOC106387397, 106406419|LOC106406419, 106443682|LOC106443682, 106354802|LOC106354802, 106398592|LOC106398592, 106445122|LOC106445122	8	106449566|LOC106449566, 106376088|LOC106376088, 106371121|LOC106371121, 106357116|LOC106357116, 106375897|LOC106375897, 106399334|LOC106399334, 106390102|LOC106390102, 106407133|LOC106407133, 106408214|LOC106408214, 106351956|LOC106351956, 106410758|LOC106410758, 106408965|LOC106408965, 106413314|LOC106413314, 106348958|LOC106348958, 106368206|LOC106368206, 106415996|LOC106415996, 106356945|LOC10…	75	699
GO:0017111	nucleoside-triphosphatase activity	Molecular Function	106450776|LOC106450776, 106345955|LOC106345955, 106415421|LOC106415421, 106441138|LOC106441138, 106398395|LOC106398395, 106386642|LOC106386642, 106452479|LOC106452479, 106410675|LOC106410675, 106379418|LOC106379418, 106439756|LOC106439756, 106454015|LOC106454015, 106345954|LOC106345954, 106359092|LOC106359092, 106386568|LOC106386568, 106386565|LOC106386565, 106445304|LOC106445304, 106430018|LOC10…	0.0742	0.00714537	106386568|LOC106386568, 106386565|LOC106386565, 106445304|LOC106445304, 106362024|LOC106362024, 106401780|LOC106401780, 106445298|LOC106445298	6	106450776|LOC106450776, 106345955|LOC106345955, 106415421|LOC106415421, 106441138|LOC106441138, 106398395|LOC106398395, 106386642|LOC106386642, 106452479|LOC106452479, 106410675|LOC106410675, 106379418|LOC106379418, 106439756|LOC106439756, 106454015|LOC106454015, 106345954|LOC106345954, 106359092|LOC106359092, 106430018|LOC106430018, 106446267|LOC106446267, 106366496|LOC106366496, 106380797|LOC10…	41	485
GO:0004888	transmembrane signaling receptor activity	Molecular Function	106450776|LOC106450776, 106345955|LOC106345955, 106451428|LOC106451428, 106406449|LOC106406449, 106398395|LOC106398395, 106386642|LOC106386642, 106452479|LOC106452479, 106410675|LOC106410675, 106379418|LOC106379418, 106439756|LOC106439756, 106454015|LOC106454015, 106453648|LOC106453648, 106345954|LOC106345954, 106359092|LOC106359092, 106386568|LOC106386568, 106386565|LOC106386565, 106445304|LOC10…	0.0874	0.000643587	106386568|LOC106386568, 106386565|LOC106386565, 106445304|LOC106445304, 106445298|LOC106445298	4	106450776|LOC106450776, 106345955|LOC106345955, 106451428|LOC106451428, 106406449|LOC106406449, 106398395|LOC106398395, 106386642|LOC106386642, 106452479|LOC106452479, 106410675|LOC106410675, 106379418|LOC106379418, 106439756|LOC106439756, 106454015|LOC106454015, 106453648|LOC106453648, 106345954|LOC106345954, 106359092|LOC106359092, 106430018|LOC106430018, 106446267|LOC106446267, 106366496|LOC10…	37	333
GO:0005506	iron ion binding	Molecular Function	106408214|LOC106408214, 106446394|LOC106446394, 106348958|LOC106348958, 106366810|LOC106366810, 106398038|LOC106398038, 106350863|LOC106350863, 106401876|LOC106401876, 106377834|LOC106377834, 106406326|LOC106406326, 106387284|LOC106387284, 106353868|LOC106353868, 106368562|LOC106368562, 106410673|LOC106410673, 106377835|LOC106377835, 106352821|LOC106352821, 106395025|LOC106395025, 106403712|LOC10…	0.0899	0.00129318	106387284|LOC106387284, 106407801|LOC106407801, 106387813|LOC106387813, 106447112|LOC106447112, 106446088|LOC106446088	5	106408214|LOC106408214, 106446394|LOC106446394, 106348958|LOC106348958, 106366810|LOC106366810, 106398038|LOC106398038, 106350863|LOC106350863, 106401876|LOC106401876, 106377834|LOC106377834, 106406326|LOC106406326, 106353868|LOC106353868, 106368562|LOC106368562, 106410673|LOC106410673, 106377835|LOC106377835, 106352821|LOC106352821, 106395025|LOC106395025, 106403712|LOC106403712, 106355888|LOC10…	28	293
GO:0004722	protein serine/threonine phosphatase activity	Molecular Function	106414112|LOC106414112, 106361085|LOC106361085, 106387890|LOC106387890, 106348417|LOC106348417, 106361058|LOC106361058, 106446984|LOC106446984, 106372621|LOC106372621, 106441147|LOC106441147, 106396362|LOC106396362, 106352748|LOC106352748, 106390593|LOC106390593, 106368514|LOC106368514, 106402123|LOC106402123, 106362019|LOC106362019, 106451999|LOC106451999, 106452531|LOC106452531, 106397114|LOC10…	0.0814	0.0246083	106352748|LOC106352748, 106452378|LOC106452378	2	106414112|LOC106414112, 106361085|LOC106361085, 106387890|LOC106387890, 106348417|LOC106348417, 106361058|LOC106361058, 106446984|LOC106446984, 106372621|LOC106372621, 106441147|LOC106441147, 106396362|LOC106396362, 106390593|LOC106390593, 106368514|LOC106368514, 106402123|LOC106402123, 106362019|LOC106362019, 106451999|LOC106451999, 106452531|LOC106452531, 106397114|LOC106397114, 106382622|LOC10…	19	220
GO:0016757	glycosyltransferase activity	Molecular Function	106397077|LOC106397077, 106349210|LOC106349210, 106415023|LOC106415023, 106365673|LOC106365673, 106450964|LOC106450964, 106396283|LOC106396283, 106352208|LOC106352208, 106388433|LOC106388433, 106396386|LOC106396386, 106347228|LOC106347228, 106396281|LOC106396281, 106372156|LOC106372156, 106357566|LOC106357566, 106437703|LOC106437703, 106382149|LOC106382149, 106386830|LOC106386830, 106375633|LOC10…	0.0781	0.0363494	106365673|LOC106365673, 106352208|LOC106352208, 106386830|LOC106386830, 106371629|LOC106371629	4	106397077|LOC106397077, 106349210|LOC106349210, 106415023|LOC106415023, 106450964|LOC106450964, 106396283|LOC106396283, 106388433|LOC106388433, 106396386|LOC106396386, 106347228|LOC106347228, 106396281|LOC106396281, 106372156|LOC106372156, 106357566|LOC106357566, 106437703|LOC106437703, 106382149|LOC106382149, 106375633|LOC106375633, 106447133|LOC106447133, 106366415|LOC106366415, 106440009|LOC10…	17	210
GO:0050662	obsolete coenzyme binding	Molecular Function	106375449|LOC106375449, 106392805|LOC106392805, 106401486|LOC106401486, 106375581|LOC106375581, 106359921|LOC106359921, 106367717|LOC106367717, 106348746|LOC106348746, 106410748|LOC106410748, 106380457|LOC106380457, 106377637|LOC106377637, 106389885|LOC106389885, 106346735|LOC106346735, 106349686|LOC106349686, 106365561|LOC106365561, 106441211|LOC106441211, 106390965|LOC106390965, 106451477|LOC10…	0.0977	0.00805551	106401486|LOC106401486, 106389885|LOC106389885, 106349686|LOC106349686	3	106375449|LOC106375449, 106392805|LOC106392805, 106375581|LOC106375581, 106359921|LOC106359921, 106367717|LOC106367717, 106348746|LOC106348746, 106410748|LOC106410748, 106380457|LOC106380457, 106377637|LOC106377637, 106346735|LOC106346735, 106365561|LOC106365561, 106441211|LOC106441211, 106390965|LOC106390965, 106451477|LOC106451477	14	151
GO:0016762	xyloglucan:xyloglucosyl transferase activity	Molecular Function	106429199|LOC106429199, 106411288|LOC106411288, 106371532|LOC106371532, 106400623|LOC106400623, 106400624|LOC106400624, 106442795|LOC106442795, 106384808|LOC106384808, 106441042|LOC106441042, 106346512|LOC106346512, 106394469|LOC106394469, 106385619|LOC106385619, 106381804|LOC106381804, 106357861|LOC106357861, 106392146|LOC106392146	0.1296	0.00121766	106381804|LOC106381804, 106357861|LOC106357861	2	106429199|LOC106429199, 106411288|LOC106411288, 106371532|LOC106371532, 106400623|LOC106400623, 106400624|LOC106400624, 106442795|LOC106442795, 106384808|LOC106384808, 106441042|LOC106441042, 106346512|LOC106346512, 106394469|LOC106394469, 106385619|LOC106385619, 106392146|LOC106392146	12	77
GO:0004553	hydrolase activity, hydrolyzing O-glycosyl compounds	Molecular Function	106429199|LOC106429199, 106411288|LOC106411288, 106371532|LOC106371532, 106400623|LOC106400623, 106400624|LOC106400624, 106442795|LOC106442795, 106384808|LOC106384808, 106441042|LOC106441042, 106346512|LOC106346512, 106394469|LOC106394469, 106385619|LOC106385619, 106381804|LOC106381804, 106357861|LOC106357861, 106392146|LOC106392146	0.1094	0.00590566	106381804|LOC106381804, 106357861|LOC106357861	2	106429199|LOC106429199, 106411288|LOC106411288, 106371532|LOC106371532, 106400623|LOC106400623, 106400624|LOC106400624, 106442795|LOC106442795, 106384808|LOC106384808, 106441042|LOC106441042, 106346512|LOC106346512, 106394469|LOC106394469, 106385619|LOC106385619, 106392146|LOC106392146	12	92
GO:0010200	response to chitin	Biological Process	106438040|LOC106438040, 106409024|LOC106409024, 106348028|LOC106348028, 106412179|LOC106412179, 106368121|LOC106368121, 106411298|LOC106411298, 106450836|LOC106450836, 106375664|LOC106375664, 106360811|LOC106360811, 106416616|LOC106416616, 106449056|LOC106449056, 106397734|LOC106397734, 106404606|LOC106404606, 106386850|LOC106386850, 106416646|LOC106416646, 106354746|LOC106354746, 106402856|LOC10…	0.2993	1.16325e-77	106385582|LOC106385582, 106451376|LOC106451376, 106449379|LOC106449379, 106443450|LOC106443450	4	106438040|LOC106438040, 106409024|LOC106409024, 106348028|LOC106348028, 106412179|LOC106412179, 106368121|LOC106368121, 106411298|LOC106411298, 106450836|LOC106450836, 106375664|LOC106375664, 106360811|LOC106360811, 106416616|LOC106416616, 106449056|LOC106449056, 106397734|LOC106397734, 106404606|LOC106404606, 106386850|LOC106386850, 106416646|LOC106416646, 106354746|LOC106354746, 106402856|LOC10…	157	429
GO:0006952	defense response	Biological Process	106409024|LOC106409024, 106368128|LOC106368128, 106368130|LOC106368130, 106415770|LOC106415770, 106416616|LOC106416616, 106360802|LOC106360802, 106397734|LOC106397734, 106445177|LOC106445177, 106427808|LOC106427808, 106453993|LOC106453993, 106438518|LOC106438518, 106402269|LOC106402269, 106439445|LOC106439445, 106375354|LOC106375354, 106445354|LOC106445354, 106358151|LOC106358151, 106449060|LOC10…	0.0862	1.14741e-07	106376331|LOC106376331, 106359860|LOC106359860, 106452385|LOC106452385, 106451376|LOC106451376, 106418593|LOC106418593, 106354802|LOC106354802, 106449379|LOC106449379, 106451864|LOC106451864, 106446156|LOC106446156, 106443450|LOC106443450, 106360291|LOC106360291, 106374549|LOC106374549, 106368261|LOC106368261, 106452793|LOC106452793	14	106409024|LOC106409024, 106368128|LOC106368128, 106368130|LOC106368130, 106415770|LOC106415770, 106416616|LOC106416616, 106360802|LOC106360802, 106397734|LOC106397734, 106445177|LOC106445177, 106427808|LOC106427808, 106453993|LOC106453993, 106438518|LOC106438518, 106402269|LOC106402269, 106439445|LOC106439445, 106375354|LOC106375354, 106445354|LOC106445354, 106358151|LOC106358151, 106449060|LOC10…	93	952
GO:0009873	ethylene-activated signaling pathway	Biological Process	106409024|LOC106409024, 106375664|LOC106375664, 106359462|LOC106359462, 106416616|LOC106416616, 106397734|LOC106397734, 106404606|LOC106404606, 106439403|LOC106439403, 106427808|LOC106427808, 106382776|LOC106382776, 106390639|LOC106390639, 106374324|LOC106374324, 106423986|LOC106423986, 106356337|LOC106356337, 106397199|LOC106397199, 106407094|LOC106407094, 106354158|LOC106354158, 106350879|LOC10…	0.1235	8.1327e-17	106365665|LOC106365665, 106350005|LOC106350005, 106446070|LOC106446070, 106445275|LOC106445275, 106390673|LOC106390673, 106454869|LOC106454869, 106451376|LOC106451376, 106382001|LOC106382001, 106351539|LOC106351539, 106366302|LOC106366302, 106369717|LOC106369717, 106366080|LOC106366080, 106358595|LOC106358595, 106449379|LOC106449379, 106409207|LOC106409207, 106443450|LOC106443450, 106349414|LOC10…	22	106409024|LOC106409024, 106375664|LOC106375664, 106359462|LOC106359462, 106416616|LOC106416616, 106397734|LOC106397734, 106404606|LOC106404606, 106439403|LOC106439403, 106427808|LOC106427808, 106382776|LOC106382776, 106390639|LOC106390639, 106374324|LOC106374324, 106423986|LOC106423986, 106356337|LOC106356337, 106397199|LOC106397199, 106407094|LOC106407094, 106354158|LOC106354158, 106350879|LOC10…	83	671
GO:0009651	response to salt stress	Biological Process	106411298|LOC106411298, 106402856|LOC106402856, 106397375|LOC106397375, 106410758|LOC106410758, 106438147|LOC106438147, 106410925|LOC106410925, 106358308|LOC106358308, 106380873|LOC106380873, 106354484|LOC106354484, 106438380|LOC106438380, 106413314|LOC106413314, 106448040|LOC106448040, 106393801|LOC106393801, 106368206|LOC106368206, 106369011|LOC106369011, 106440313|LOC106440313, 106415257|LOC10…	0.0655	0.0108616	106397375|LOC106397375, 106437727|LOC106437727, 106415916|LOC106415916, 106387293|LOC106387293, 106371648|LOC106371648, 106404152|LOC106404152, 106446075|LOC106446075, 106454869|LOC106454869, 106418593|LOC106418593, 106391527|LOC106391527, 106451400|LOC106451400, 106363738|LOC106363738, 106395035|LOC106395035	13	106411298|LOC106411298, 106402856|LOC106402856, 106410758|LOC106410758, 106438147|LOC106438147, 106410925|LOC106410925, 106358308|LOC106358308, 106380873|LOC106380873, 106354484|LOC106354484, 106438380|LOC106438380, 106413314|LOC106413314, 106448040|LOC106448040, 106393801|LOC106393801, 106368206|LOC106368206, 106369011|LOC106369011, 106440313|LOC106440313, 106415257|LOC106415257, 106390878|LOC10…	75	1072
GO:0009414	response to water deprivation	Biological Process	106361235|LOC106361235, 106416491|LOC106416491, 106411298|LOC106411298, 106402856|LOC106402856, 106438147|LOC106438147, 106410925|LOC106410925, 106358308|LOC106358308, 106380873|LOC106380873, 106354484|LOC106354484, 106394225|LOC106394225, 106448040|LOC106448040, 106354399|LOC106354399, 106393801|LOC106393801, 106402418|LOC106402418, 106388139|LOC106388139, 106415257|LOC106415257, 106367827|LOC10…	0.1022	2.52113e-09	106354399|LOC106354399, 106387122|LOC106387122, 106454869|LOC106454869, 106366080|LOC106366080, 106377376|LOC106377376, 106379879|LOC106379879, 106405387|LOC106405387, 106358371|LOC106358371, 106370866|LOC106370866	9	106361235|LOC106361235, 106416491|LOC106416491, 106411298|LOC106411298, 106402856|LOC106402856, 106438147|LOC106438147, 106410925|LOC106410925, 106358308|LOC106358308, 106380873|LOC106380873, 106354484|LOC106354484, 106394225|LOC106394225, 106448040|LOC106448040, 106393801|LOC106393801, 106402418|LOC106402418, 106388139|LOC106388139, 106415257|LOC106415257, 106367827|LOC106367827, 106381875|LOC10…	73	665
GO:0009409	response to cold	Biological Process	106438040|LOC106438040, 106409024|LOC106409024, 106450836|LOC106450836, 106416616|LOC106416616, 106397734|LOC106397734, 106401732|LOC106401732, 106351956|LOC106351956, 106429199|LOC106429199, 106345838|LOC106345838, 106438147|LOC106438147, 106410925|LOC106410925, 106449060|LOC106449060, 106354484|LOC106354484, 106371532|LOC106371532, 106354399|LOC106354399, 106400623|LOC106400623, 106400624|LOC10…	0.0816	4.24568e-05	106354399|LOC106354399, 106393595|LOC106393595, 106441544|LOC106441544, 106397015|LOC106397015, 106352563|LOC106352563, 106400927|LOC106400927	6	106438040|LOC106438040, 106409024|LOC106409024, 106450836|LOC106450836, 106416616|LOC106416616, 106397734|LOC106397734, 106401732|LOC106401732, 106351956|LOC106351956, 106429199|LOC106429199, 106345838|LOC106345838, 106438147|LOC106438147, 106410925|LOC106410925, 106449060|LOC106449060, 106354484|LOC106354484, 106371532|LOC106371532, 106400623|LOC106400623, 106400624|LOC106400624, 106453198|LOC10…	71	759
GO:0006915	apoptotic process	Biological Process	106450776|LOC106450776, 106345955|LOC106345955, 106438518|LOC106438518, 106402269|LOC106402269, 106375354|LOC106375354, 106348562|LOC106348562, 106361103|LOC106361103, 106451428|LOC106451428, 106372476|LOC106372476, 106406449|LOC106406449, 106398395|LOC106398395, 106381875|LOC106381875, 106386642|LOC106386642, 106452479|LOC106452479, 106410675|LOC106410675, 106381705|LOC106381705, 106379418|LOC10…	0.0889	2.87187e-06	106386568|LOC106386568, 106386565|LOC106386565, 106445304|LOC106445304, 106433849|LOC106433849, 106438779|LOC106438779, 106366718|LOC106366718, 106451762|LOC106451762, 106414982|LOC106414982, 106399105|LOC106399105, 106445298|LOC106445298, 106415238|LOC106415238	11	106450776|LOC106450776, 106345955|LOC106345955, 106438518|LOC106438518, 106402269|LOC106402269, 106375354|LOC106375354, 106348562|LOC106348562, 106361103|LOC106361103, 106451428|LOC106451428, 106372476|LOC106372476, 106406449|LOC106406449, 106398395|LOC106398395, 106381875|LOC106381875, 106386642|LOC106386642, 106452479|LOC106452479, 106410675|LOC106410675, 106381705|LOC106381705, 106379418|LOC10…	64	641
GO:0009611	response to wounding	Biological Process	106347687|LOC106347687, 106412179|LOC106412179, 106387890|LOC106387890, 106348417|LOC106348417, 106386850|LOC106386850, 106416646|LOC106416646, 106445177|LOC106445177, 106385592|LOC106385592, 106408214|LOC106408214, 106446984|LOC106446984, 106385138|LOC106385138, 106437772|LOC106437772, 106449060|LOC106449060, 106403316|LOC106403316, 106348958|LOC106348958, 106402817|LOC106402817, 106354817|LOC10…	0.1234	2.26009e-11	106371648|LOC106371648, 106391527|LOC106391527, 106371079|LOC106371079, 106451864|LOC106451864, 106380914|LOC106380914	5	106347687|LOC106347687, 106412179|LOC106412179, 106387890|LOC106387890, 106348417|LOC106348417, 106386850|LOC106386850, 106416646|LOC106416646, 106445177|LOC106445177, 106385592|LOC106385592, 106408214|LOC106408214, 106446984|LOC106446984, 106385138|LOC106385138, 106437772|LOC106437772, 106449060|LOC106449060, 106403316|LOC106403316, 106348958|LOC106348958, 106402817|LOC106402817, 106354817|LOC10…	63	429
GO:0050832	defense response to fungus	Biological Process	106438040|LOC106438040, 106387890|LOC106387890, 106348417|LOC106348417, 106450836|LOC106450836, 106354746|LOC106354746, 106401732|LOC106401732, 106408214|LOC106408214, 106446984|LOC106446984, 106372529|LOC106372529, 106397199|LOC106397199, 106407094|LOC106407094, 106345838|LOC106345838, 106438147|LOC106438147, 106410925|LOC106410925, 106406682|LOC106406682, 106401993|LOC106401993, 106382744|LOC10…	0.1095	4.90682e-09	106379059|LOC106379059, 106438995|LOC106438995, 106345598|LOC106345598, 106417637|LOC106417637	4	106438040|LOC106438040, 106387890|LOC106387890, 106348417|LOC106348417, 106450836|LOC106450836, 106354746|LOC106354746, 106401732|LOC106401732, 106408214|LOC106408214, 106446984|LOC106446984, 106372529|LOC106372529, 106397199|LOC106397199, 106407094|LOC106407094, 106345838|LOC106345838, 106438147|LOC106438147, 106410925|LOC106410925, 106406682|LOC106406682, 106401993|LOC106401993, 106382744|LOC10…	63	431
GO:0009738	abscisic acid-activated signaling pathway	Biological Process	106411298|LOC106411298, 106387890|LOC106387890, 106348417|LOC106348417, 106402856|LOC106402856, 106391869|LOC106391869, 106446984|LOC106446984, 106410758|LOC106410758, 106358308|LOC106358308, 106354484|LOC106354484, 106413314|LOC106413314, 106448040|LOC106448040, 106351824|LOC106351824, 106393801|LOC106393801, 106368206|LOC106368206, 106390878|LOC106390878, 106415996|LOC106415996, 106415345|LOC10…	0.0793	0.000512895	106350005|LOC106350005, 106415916|LOC106415916, 106389484|LOC106389484, 106351539|LOC106351539, 106385500|LOC106385500, 106345966|LOC106345966, 106345783|LOC106345783, 106388157|LOC106388157, 106366820|LOC106366820, 106437562|LOC106437562, 106417593|LOC106417593, 106395035|LOC106395035	12	106411298|LOC106411298, 106387890|LOC106387890, 106348417|LOC106348417, 106402856|LOC106402856, 106391869|LOC106391869, 106446984|LOC106446984, 106410758|LOC106410758, 106358308|LOC106358308, 106354484|LOC106354484, 106413314|LOC106413314, 106448040|LOC106448040, 106351824|LOC106351824, 106393801|LOC106393801, 106368206|LOC106368206, 106390878|LOC106390878, 106415996|LOC106415996, 106415345|LOC10…	49	579
GO:0009408	response to heat	Biological Process	106412179|LOC106412179, 106386850|LOC106386850, 106416646|LOC106416646, 106385592|LOC106385592, 106408214|LOC106408214, 106385138|LOC106385138, 106351956|LOC106351956, 106429199|LOC106429199, 106449060|LOC106449060, 106371532|LOC106371532, 106400623|LOC106400623, 106348958|LOC106348958, 106400624|LOC106400624, 106402021|LOC106402021, 106412175|LOC106412175, 106390565|LOC106390565, 106401239|LOC10…	0.1322	2.07468e-11	106401075|LOC106401075, 106367031|LOC106367031	2	106412179|LOC106412179, 106386850|LOC106386850, 106416646|LOC106416646, 106385592|LOC106385592, 106408214|LOC106408214, 106385138|LOC106385138, 106351956|LOC106351956, 106429199|LOC106429199, 106449060|LOC106449060, 106371532|LOC106371532, 106400623|LOC106400623, 106348958|LOC106348958, 106400624|LOC106400624, 106402021|LOC106402021, 106412175|LOC106412175, 106390565|LOC106390565, 106401239|LOC10…	58	361
GO:0042742	defense response to bacterium	Biological Process	106347687|LOC106347687, 106438373|LOC106438373, 106354746|LOC106354746, 106348866|LOC106348866, 106345955|LOC106345955, 106384754|LOC106384754, 106372529|LOC106372529, 106371662|LOC106371662, 106411287|LOC106411287, 106348804|LOC106348804, 106354732|LOC106354732, 106438147|LOC106438147, 106410925|LOC106410925, 106401993|LOC106401993, 106446122|LOC106446122, 106402817|LOC106402817, 106354817|LOC10…	0.066	0.0279149	106379059|LOC106379059, 106380526|LOC106380526, 106438995|LOC106438995, 106345598|LOC106345598, 106375026|LOC106375026	5	106347687|LOC106347687, 106438373|LOC106438373, 106354746|LOC106354746, 106348866|LOC106348866, 106345955|LOC106345955, 106384754|LOC106384754, 106372529|LOC106372529, 106371662|LOC106371662, 106411287|LOC106411287, 106348804|LOC106348804, 106354732|LOC106354732, 106438147|LOC106438147, 106410925|LOC106410925, 106401993|LOC106401993, 106446122|LOC106446122, 106402817|LOC106402817, 106354817|LOC10…	54	728
GO:0009734	auxin-activated signaling pathway	Biological Process	106444036|LOC106444036, 106345589|LOC106345589, 106406807|LOC106406807, 106385117|LOC106385117, 106351463|LOC106351463, 106366639|LOC106366639, 106385306|LOC106385306, 106386049|LOC106386049, 106378415|LOC106378415, 106350005|LOC106350005, 106389678|LOC106389678, 106443173|LOC106443173, 106445437|LOC106445437, 106447220|LOC106447220, 106364693|LOC106364693, 106445788|LOC106445788, 106443414|LOC10…	0.0741	0.00345896	106385117|LOC106385117, 106351463|LOC106351463, 106385306|LOC106385306, 106386049|LOC106386049, 106378415|LOC106378415, 106350005|LOC106350005, 106389678|LOC106389678, 106443173|LOC106443173, 106445437|LOC106445437, 106364693|LOC106364693, 106445788|LOC106445788, 106361648|LOC106361648, 106452119|LOC106452119, 106387766|LOC106387766, 106443175|LOC106443175, 106385305|LOC106385305, 106349482|LOC10…	45	106444036|LOC106444036, 106345589|LOC106345589, 106406807|LOC106406807, 106366639|LOC106366639, 106447220|LOC106447220, 106443414|LOC106443414, 106451260|LOC106451260, 106411385|LOC106411385, 106389007|LOC106389007, 106453943|LOC106453943, 106451734|LOC106451734, 106380960|LOC106380960	12	618
GO:0006979	response to oxidative stress	Biological Process	106397077|LOC106397077, 106415023|LOC106415023, 106412179|LOC106412179, 106386850|LOC106386850, 106416646|LOC106416646, 106385592|LOC106385592, 106385138|LOC106385138, 106438055|LOC106438055, 106450828|LOC106450828, 106396283|LOC106396283, 106440313|LOC106440313, 106451402|LOC106451402, 106402548|LOC106402548, 106398793|LOC106398793, 106348754|LOC106348754, 106356213|LOC106356213, 106450452|LOC10…	0.1022	2.44653e-06	106451402|LOC106451402, 106451401|LOC106451401, 106389874|LOC106389874, 106361099|LOC106361099, 106389887|LOC106389887, 106445991|LOC106445991, 106451864|LOC106451864, 106438704|LOC106438704	8	106397077|LOC106397077, 106415023|LOC106415023, 106412179|LOC106412179, 106386850|LOC106386850, 106416646|LOC106416646, 106385592|LOC106385592, 106385138|LOC106385138, 106438055|LOC106438055, 106450828|LOC106450828, 106396283|LOC106396283, 106440313|LOC106440313, 106402548|LOC106402548, 106398793|LOC106398793, 106348754|LOC106348754, 106356213|LOC106356213, 106450452|LOC106450452, 106405905|LOC10…	43	375
GO:0009751	response to salicylic acid	Biological Process	106411298|LOC106411298, 106354746|LOC106354746, 106402856|LOC106402856, 106372529|LOC106372529, 106358308|LOC106358308, 106449060|LOC106449060, 106438055|LOC106438055, 106446122|LOC106446122, 106448040|LOC106448040, 106393801|LOC106393801, 106450828|LOC106450828, 106402817|LOC106402817, 106354817|LOC106354817, 106454769|LOC106454769, 106390878|LOC106390878, 106412175|LOC106412175, 106375281|LOC10…	0.1108	1.08994e-06	106454869|LOC106454869, 106447625|LOC106447625, 106418593|LOC106418593, 106354802|LOC106354802	4	106411298|LOC106411298, 106354746|LOC106354746, 106402856|LOC106402856, 106372529|LOC106372529, 106358308|LOC106358308, 106449060|LOC106449060, 106438055|LOC106438055, 106446122|LOC106446122, 106448040|LOC106448040, 106393801|LOC106393801, 106450828|LOC106450828, 106402817|LOC106402817, 106354817|LOC106354817, 106454769|LOC106454769, 106390878|LOC106390878, 106412175|LOC106412175, 106375281|LOC10…	41	324
GO:0009733	response to auxin	Biological Process	106411298|LOC106411298, 106376088|LOC106376088, 106375897|LOC106375897, 106399334|LOC106399334, 106445177|LOC106445177, 106402856|LOC106402856, 106390102|LOC106390102, 106345955|LOC106345955, 106351956|LOC106351956, 106429199|LOC106429199, 106358308|LOC106358308, 106371532|LOC106371532, 106448040|LOC106448040, 106393801|LOC106393801, 106400623|LOC106400623, 106400624|LOC106400624, 106390878|LOC10…	0.0869	0.000415035	106348419|LOC106348419, 106379046|LOC106379046	2	106411298|LOC106411298, 106376088|LOC106376088, 106375897|LOC106375897, 106399334|LOC106399334, 106445177|LOC106445177, 106402856|LOC106402856, 106390102|LOC106390102, 106345955|LOC106345955, 106351956|LOC106351956, 106429199|LOC106429199, 106358308|LOC106358308, 106371532|LOC106371532, 106448040|LOC106448040, 106393801|LOC106393801, 106400623|LOC106400623, 106400624|LOC106400624, 106390878|LOC10…	43	402
GO:0006950	response to stress	Biological Process	106368121|LOC106368121, 106360811|LOC106360811, 106386038|LOC106386038, 106451871|LOC106451871, 106356254|LOC106356254, 106440325|LOC106440325, 106353988|LOC106353988, 106351824|LOC106351824, 106453459|LOC106453459, 106381126|LOC106381126, 106364157|LOC106364157, 106386039|LOC106386039, 106364156|LOC106364156, 106357992|LOC106357992, 106366257|LOC106366257, 106366232|LOC106366232, 106353949|LOC10…	0.0755	0.00625801	106451871|LOC106451871, 106451584|LOC106451584, 106437562|LOC106437562, 106442702|LOC106442702	4	106368121|LOC106368121, 106360811|LOC106360811, 106386038|LOC106386038, 106356254|LOC106356254, 106440325|LOC106440325, 106353988|LOC106353988, 106351824|LOC106351824, 106453459|LOC106453459, 106381126|LOC106381126, 106364157|LOC106364157, 106386039|LOC106386039, 106364156|LOC106364156, 106357992|LOC106357992, 106366257|LOC106366257, 106366232|LOC106366232, 106353949|LOC106353949, 106353991|LOC10…	41	470
GO:0009753	response to jasmonic acid	Biological Process	106411298|LOC106411298, 106445177|LOC106445177, 106402856|LOC106402856, 106358308|LOC106358308, 106448040|LOC106448040, 106393801|LOC106393801, 106454769|LOC106454769, 106390878|LOC106390878, 106375281|LOC106375281, 106393512|LOC106393512, 106445910|LOC106445910, 106346849|LOC106346849, 106399326|LOC106399326, 106377834|LOC106377834, 106406326|LOC106406326, 106448212|LOC106448212, 106353868|LOC10…	0.0766	0.0108186	106454869|LOC106454869, 106446156|LOC106446156	2	106411298|LOC106411298, 106445177|LOC106445177, 106402856|LOC106402856, 106358308|LOC106358308, 106448040|LOC106448040, 106393801|LOC106393801, 106454769|LOC106454769, 106390878|LOC106390878, 106375281|LOC106375281, 106393512|LOC106393512, 106445910|LOC106445910, 106346849|LOC106346849, 106399326|LOC106399326, 106377834|LOC106377834, 106406326|LOC106406326, 106448212|LOC106448212, 106353868|LOC10…	34	380
GO:0045087	innate immune response	Biological Process	106450776|LOC106450776, 106351956|LOC106351956, 106398395|LOC106398395, 106386642|LOC106386642, 106452479|LOC106452479, 106379418|LOC106379418, 106439756|LOC106439756, 106398518|LOC106398518, 106454015|LOC106454015, 106359092|LOC106359092, 106386568|LOC106386568, 106386565|LOC106386565, 106440531|LOC106440531, 106445304|LOC106445304, 106439074|LOC106439074, 106446267|LOC106446267, 106366496|LOC10…	0.0773	0.0104684	106386568|LOC106386568, 106386565|LOC106386565, 106445304|LOC106445304, 106445298|LOC106445298	4	106450776|LOC106450776, 106351956|LOC106351956, 106398395|LOC106398395, 106386642|LOC106386642, 106452479|LOC106452479, 106379418|LOC106379418, 106439756|LOC106439756, 106398518|LOC106398518, 106454015|LOC106454015, 106359092|LOC106359092, 106440531|LOC106440531, 106439074|LOC106439074, 106446267|LOC106446267, 106366496|LOC106366496, 106380797|LOC106380797, 106361276|LOC106361276, 106376492|LOC10…	31	329
GO:0010193	response to ozone	Biological Process	106450776|LOC106450776, 106398395|LOC106398395, 106440313|LOC106440313, 106386642|LOC106386642, 106452479|LOC106452479, 106379418|LOC106379418, 106439756|LOC106439756, 106454015|LOC106454015, 106359092|LOC106359092, 106386568|LOC106386568, 106386565|LOC106386565, 106445304|LOC106445304, 106397390|LOC106397390, 106446267|LOC106446267, 106366496|LOC106366496, 106380797|LOC106380797, 106361276|LOC10…	0.1124	4.86217e-05	106386568|LOC106386568, 106386565|LOC106386565, 106445304|LOC106445304, 106397390|LOC106397390, 106445298|LOC106445298	5	106450776|LOC106450776, 106398395|LOC106398395, 106440313|LOC106440313, 106386642|LOC106386642, 106452479|LOC106452479, 106379418|LOC106379418, 106439756|LOC106439756, 106454015|LOC106454015, 106359092|LOC106359092, 106446267|LOC106446267, 106366496|LOC106366496, 106380797|LOC106380797, 106361276|LOC106361276, 106405965|LOC106405965, 106385074|LOC106385074, 106392345|LOC106392345, 106354774|LOC10…	25	207
GO:0042542	response to hydrogen peroxide	Biological Process	106351956|LOC106351956, 106440678|LOC106440678, 106401239|LOC106401239, 106380846|LOC106380846, 106438387|LOC106438387, 106443219|LOC106443219, 106351544|LOC106351544, 106451531|LOC106451531, 106438385|LOC106438385, 106353095|LOC106353095, 106451511|LOC106451511, 106406849|LOC106406849, 106387209|LOC106387209, 106354342|LOC106354342, 106376492|LOC106376492, 106446343|LOC106446343, 106446344|LOC10…	0.1862	5.1317e-09		0	106351956|LOC106351956, 106440678|LOC106440678, 106401239|LOC106401239, 106380846|LOC106380846, 106438387|LOC106438387, 106443219|LOC106443219, 106351544|LOC106351544, 106451531|LOC106451531, 106438385|LOC106438385, 106353095|LOC106353095, 106451511|LOC106451511, 106406849|LOC106406849, 106387209|LOC106387209, 106354342|LOC106354342, 106376492|LOC106376492, 106446343|LOC106446343, 106446344|LOC10…	27	123
GO:0009644	response to high light intensity	Biological Process	106418302|LOC106418302, 106347418|LOC106347418, 106347780|LOC106347780, 106418649|LOC106418649, 106451820|LOC106451820, 106401239|LOC106401239, 106438387|LOC106438387, 106443219|LOC106443219, 106351544|LOC106351544, 106451531|LOC106451531, 106438385|LOC106438385, 106396002|LOC106396002, 106353095|LOC106353095, 106451511|LOC106451511, 106406849|LOC106406849, 106376925|LOC106376925, 106387209|LOC10…	0.172	2.98787e-08		0	106418302|LOC106418302, 106347418|LOC106347418, 106347780|LOC106347780, 106418649|LOC106418649, 106451820|LOC106451820, 106401239|LOC106401239, 106438387|LOC106438387, 106443219|LOC106443219, 106351544|LOC106351544, 106451531|LOC106451531, 106438385|LOC106438385, 106396002|LOC106396002, 106353095|LOC106353095, 106451511|LOC106451511, 106406849|LOC106406849, 106376925|LOC106376925, 106387209|LOC10…	27	130
GO:0009617	response to bacterium	Biological Process	106437772|LOC106437772, 106372476|LOC106372476, 106401239|LOC106401239, 106351544|LOC106351544, 106388001|LOC106388001, 106353095|LOC106353095, 106377834|LOC106377834, 106406326|LOC106406326, 106353868|LOC106353868, 106377835|LOC106377835, 106403712|LOC106403712, 106355888|LOC106355888, 106405163|LOC106405163, 106380862|LOC106380862, 106377836|LOC106377836, 106382159|LOC106382159, 106347512|LOC10…	0.1325	4.16027e-05	106354802|LOC106354802	1	106437772|LOC106437772, 106372476|LOC106372476, 106401239|LOC106401239, 106351544|LOC106351544, 106388001|LOC106388001, 106353095|LOC106353095, 106377834|LOC106377834, 106406326|LOC106406326, 106353868|LOC106353868, 106377835|LOC106377835, 106403712|LOC106403712, 106355888|LOC106355888, 106405163|LOC106405163, 106380862|LOC106380862, 106377836|LOC106377836, 106382159|LOC106382159, 106347512|LOC10…	21	129
GO:0006470	protein dephosphorylation	Biological Process	106414112|LOC106414112, 106361085|LOC106361085, 106387890|LOC106387890, 106348417|LOC106348417, 106361058|LOC106361058, 106446984|LOC106446984, 106372621|LOC106372621, 106441147|LOC106441147, 106396362|LOC106396362, 106352748|LOC106352748, 106390593|LOC106390593, 106368514|LOC106368514, 106451999|LOC106451999, 106452531|LOC106452531, 106397114|LOC106397114, 106382622|LOC106382622, 106372601|LOC10…	0.0797	0.0336502	106352748|LOC106352748, 106452378|LOC106452378	2	106414112|LOC106414112, 106361085|LOC106361085, 106387890|LOC106387890, 106348417|LOC106348417, 106361058|LOC106361058, 106446984|LOC106446984, 106372621|LOC106372621, 106441147|LOC106441147, 106396362|LOC106396362, 106390593|LOC106390593, 106368514|LOC106368514, 106451999|LOC106451999, 106452531|LOC106452531, 106397114|LOC106397114, 106382622|LOC106382622, 106372601|LOC106372601, 106451239|LOC10…	18	214
GO:0042538	hyperosmotic salinity response	Biological Process	106412179|LOC106412179, 106386850|LOC106386850, 106416646|LOC106416646, 106385592|LOC106385592, 106385138|LOC106385138, 106394225|LOC106394225, 106354399|LOC106354399, 106439368|LOC106439368, 106356213|LOC106356213, 106348955|LOC106348955, 106409004|LOC106409004, 106356214|LOC106356214, 106397015|LOC106397015, 106447625|LOC106447625, 106398592|LOC106398592, 106387066|LOC106387066, 106371076|LOC10…	0.1353	0.000152926	106354399|LOC106354399, 106397015|LOC106397015, 106447625|LOC106447625, 106398592|LOC106398592	4	106412179|LOC106412179, 106386850|LOC106386850, 106416646|LOC106416646, 106385592|LOC106385592, 106385138|LOC106385138, 106394225|LOC106394225, 106439368|LOC106439368, 106356213|LOC106356213, 106348955|LOC106348955, 106409004|LOC106409004, 106356214|LOC106356214, 106387066|LOC106387066, 106371076|LOC106371076, 106371075|LOC106371075	14	108
GO:0000151	ubiquitin ligase complex	Cellular Component	106348028|LOC106348028, 106401500|LOC106401500, 106350340|LOC106350340, 106384828|LOC106384828, 106449755|LOC106449755, 106368214|LOC106368214, 106408610|LOC106408610, 106443038|LOC106443038, 106450052|LOC106450052, 106345267|LOC106345267, 106402418|LOC106402418, 106418673|LOC106418673, 106388139|LOC106388139, 106346667|LOC106346667, 106374666|LOC106374666, 106390073|LOC106390073, 106367827|LOC10…	0.1125	9.4823e-07	106384133|LOC106384133, 106366309|LOC106366309	2	106348028|LOC106348028, 106401500|LOC106401500, 106350340|LOC106350340, 106384828|LOC106384828, 106449755|LOC106449755, 106368214|LOC106368214, 106408610|LOC106408610, 106443038|LOC106443038, 106450052|LOC106450052, 106345267|LOC106345267, 106402418|LOC106402418, 106418673|LOC106418673, 106388139|LOC106388139, 106346667|LOC106346667, 106374666|LOC106374666, 106390073|LOC106390073, 106367827|LOC10…	42	314
GO:0031224	intrinsic component of membrane	Cellular Component	106450776|LOC106450776, 106345955|LOC106345955, 106451428|LOC106451428, 106406449|LOC106406449, 106398395|LOC106398395, 106386642|LOC106386642, 106452479|LOC106452479, 106410675|LOC106410675, 106379418|LOC106379418, 106439756|LOC106439756, 106454015|LOC106454015, 106453648|LOC106453648, 106345954|LOC106345954, 106359092|LOC106359092, 106386568|LOC106386568, 106386565|LOC106386565, 106445304|LOC10…	0.0924	0.000249098	106386568|LOC106386568, 106386565|LOC106386565, 106445304|LOC106445304, 106445298|LOC106445298	4	106450776|LOC106450776, 106345955|LOC106345955, 106451428|LOC106451428, 106406449|LOC106406449, 106398395|LOC106398395, 106386642|LOC106386642, 106452479|LOC106452479, 106410675|LOC106410675, 106379418|LOC106379418, 106439756|LOC106439756, 106454015|LOC106454015, 106453648|LOC106453648, 106345954|LOC106345954, 106359092|LOC106359092, 106430018|LOC106430018, 106446267|LOC106446267, 106366496|LOC10…	36	306
GO:0031225	anchored component of membrane	Cellular Component	106382828|LOC106382828, 106382827|LOC106382827, 106365180|LOC106365180, 106396942|LOC106396942, 106388887|LOC106388887, 106381973|LOC106381973, 106454430|LOC106454430, 106387421|LOC106387421, 106446435|LOC106446435, 106425847|LOC106425847, 106348063|LOC106348063, 106394654|LOC106394654, 106353355|LOC106353355, 106367246|LOC106367246, 106348064|LOC106348064, 106389874|LOC106389874, 106373005|LOC10…	0.0993	0.000656317	106381973|LOC106381973, 106353355|LOC106353355, 106389874|LOC106389874, 106389887|LOC106389887, 106386021|LOC106386021, 106360291|LOC106360291, 106370497|LOC106370497	7	106382828|LOC106382828, 106382827|LOC106382827, 106365180|LOC106365180, 106396942|LOC106396942, 106388887|LOC106388887, 106454430|LOC106454430, 106387421|LOC106387421, 106446435|LOC106446435, 106425847|LOC106425847, 106348063|LOC106348063, 106394654|LOC106394654, 106367246|LOC106367246, 106348064|LOC106348064, 106373005|LOC106373005, 106409001|LOC106409001, 106407667|LOC106407667, 106345454|LOC10…	21	210
GO:0008287	protein serine/threonine phosphatase complex	Cellular Component	106414112|LOC106414112, 106361085|LOC106361085, 106387890|LOC106387890, 106348417|LOC106348417, 106361058|LOC106361058, 106446984|LOC106446984, 106372621|LOC106372621, 106441147|LOC106441147, 106396362|LOC106396362, 106352748|LOC106352748, 106390593|LOC106390593, 106368514|LOC106368514, 106451999|LOC106451999, 106452531|LOC106452531, 106397114|LOC106397114, 106382622|LOC106382622, 106372601|LOC10…	0.1027	0.0030809	106352748|LOC106352748, 106452378|LOC106452378	2	106414112|LOC106414112, 106361085|LOC106361085, 106387890|LOC106387890, 106348417|LOC106348417, 106361058|LOC106361058, 106446984|LOC106446984, 106372621|LOC106372621, 106441147|LOC106441147, 106396362|LOC106396362, 106390593|LOC106390593, 106368514|LOC106368514, 106451999|LOC106451999, 106452531|LOC106452531, 106397114|LOC106397114, 106382622|LOC106382622, 106372601|LOC106372601, 106385269|LOC10…	17	153
GO:0032580	Golgi cisterna membrane	Cellular Component	106375449|LOC106375449, 106392805|LOC106392805, 106375581|LOC106375581, 106410748|LOC106410748, 106357566|LOC106357566, 106380457|LOC106380457, 106437703|LOC106437703, 106377637|LOC106377637, 106389885|LOC106389885, 106406742|LOC106406742, 106411126|LOC106411126, 106441211|LOC106441211, 106390965|LOC106390965	0.0861	0.0460797	106389885|LOC106389885	1	106375449|LOC106375449, 106392805|LOC106392805, 106375581|LOC106375581, 106410748|LOC106410748, 106357566|LOC106357566, 106380457|LOC106380457, 106437703|LOC106437703, 106377637|LOC106377637, 106406742|LOC106406742, 106411126|LOC106411126, 106441211|LOC106441211, 106390965|LOC106390965	12	119
GO:0016604	nuclear body	Cellular Component	106439403|LOC106439403, 106382776|LOC106382776, 106389186|LOC106389186, 106397060|LOC106397060, 106349419|LOC106349419, 106377073|LOC106377073	0.2069	0.00303592		0	106439403|LOC106439403, 106382776|LOC106382776, 106389186|LOC106389186, 106397060|LOC106397060, 106349419|LOC106349419, 106377073|LOC106377073	6	24
GO:0000299	obsolete integral to membrane of membrane fraction	Cellular Component	106410999|LOC106410999, 106439935|LOC106439935, 106382737|LOC106382737, 106384998|LOC106384998	0.4	0.00111161		0	106410999|LOC106410999, 106439935|LOC106439935, 106382737|LOC106382737, 106384998|LOC106384998	4	9
GO:0010168	ER body	Cellular Component	106418602|LOC106418602, 106404178|LOC106404178, 106345733|LOC106345733, 106374420|LOC106374420	0.2667	0.00588512		0	106418602|LOC106418602, 106404178|LOC106404178, 106345733|LOC106345733, 106374420|LOC106374420	4	11
GO:0009513	etioplast	Cellular Component	106384672|LOC106384672, 106361432|LOC106361432	0.6667	0.00755599	106384672|LOC106384672, 106361432|LOC106361432	2		0	3
GO:0000506	glycosylphosphatidylinositol-N-acetylglucosaminyltransferase (GPI-GnT) complex	Cellular Component	106370718|LOC106370718, 106372585|LOC106372585	0.5	0.0146001	106372585|LOC106372585	1	106370718|LOC106370718	1	2
GO:0009923	fatty acid elongase complex	Cellular Component	106384895|LOC106384895, 106405914|LOC106405914	0.5	0.0146001	106384895|LOC106384895, 106405914|LOC106405914	2		0	4
GO:0043680	filiform apparatus	Cellular Component	106440097|LOC106440097, 106437922|LOC106437922	0.3333	0.0340852		0	106440097|LOC106440097, 106437922|LOC106437922	2	6
GO:0030017	sarcomere	Cellular Component	106433437|LOC106433437, 106408069|LOC106408069	0.2857	0.0461245	106433437|LOC106433437, 106408069|LOC106408069	2		0	5

## Sheet: MT vs ST-25
Supplemental Data 2. GO analysis of DEGs between MS mutant and WT at different DAG.
ST: Time after germination of single-stem plants (WT), MT: Time after germination of multi-stems (MS) mutants.
The significantly enrichened GO terms were selected by p value <0.05.
GO_ID	GO_Term	GO_Category	IDs	Rich.Factor	P.value	S_Up_ID	S_Up_Num	S_Down_ID	S_Down_Num	MapID_Count
GO:0009055	electron transfer activity	Molecular Function	106390013|LOC106390013, 106451283|LOC106451283, 106366804|LOC106366804, 106354655|LOC106354655, 106453218|LOC106453218, 106437590|LOC106437590, 106400535|LOC106400535, 106443160|LOC106443160, 106346112|LOC106346112, 106354597|LOC106354597, 106361411|LOC106361411, 106392053|LOC106392053, 106431372|LOC106431372, 106377370|LOC106377370, 106402510|LOC106402510, 106400536|LOC106400536, 106381856|LOC10…	0.0755	0.00154127	106451283|LOC106451283, 106354655|LOC106354655, 106400535|LOC106400535, 106443160|LOC106443160, 106346112|LOC106346112, 106354597|LOC106354597, 106361411|LOC106361411, 106400536|LOC106400536, 106375394|LOC106375394, 106348513|LOC106348513, 106428494|LOC106428494, 106349108|LOC106349108, 106412462|LOC106412462, 106365138|LOC106365138, 106410890|LOC106410890, 106402231|LOC106402231, 106364522|LOC10…	32	106390013|LOC106390013, 106366804|LOC106366804, 106453218|LOC106453218, 106437590|LOC106437590, 106392053|LOC106392053, 106431372|LOC106431372, 106377370|LOC106377370, 106402510|LOC106402510, 106381856|LOC106381856, 106387868|LOC106387868, 106349172|LOC106349172, 106438033|LOC106438033, 106348399|LOC106348399, 106348958|LOC106348958, 106408214|LOC106408214, 106391411|LOC106391411, 106409715|LOC10…	83	1142
GO:0005507	copper ion binding	Molecular Function	106415904|LOC106415904, 106447616|LOC106447616, 106403511|LOC106403511, 106401061|LOC106401061, 106376331|LOC106376331, 106438967|LOC106438967, 106385758|LOC106385758, 106375394|LOC106375394, 106348513|LOC106348513, 106451056|LOC106451056, 106347720|LOC106347720, 106452089|LOC106452089, 106393595|LOC106393595, 106372627|LOC106372627, 106409715|LOC106409715, 106441311|LOC106441311, 106381340|LOC10…	0.0772	0.0143599	106403511|LOC106403511, 106376331|LOC106376331, 106375394|LOC106375394, 106348513|LOC106348513, 106393595|LOC106393595, 106365138|LOC106365138, 106359860|LOC106359860, 106410890|LOC106410890, 106387653|LOC106387653, 106351149|LOC106351149, 106451877|LOC106451877, 106371395|LOC106371395, 106441544|LOC106441544, 106365910|LOC106365910, 106362013|LOC106362013, 106365995|LOC106365995, 106386417|LOC10…	17	106415904|LOC106415904, 106447616|LOC106447616, 106401061|LOC106401061, 106438967|LOC106438967, 106385758|LOC106385758, 106451056|LOC106451056, 106347720|LOC106347720, 106452089|LOC106452089, 106372627|LOC106372627, 106409715|LOC106409715, 106441311|LOC106441311, 106381340|LOC106381340, 106376112|LOC106376112, 106445972|LOC106445972, 106449265|LOC106449265, 106387111|LOC106387111, 106354757|LOC10…	39	556
GO:0004497	monooxygenase activity	Molecular Function	106390013|LOC106390013, 106361411|LOC106361411, 106392053|LOC106392053, 106381856|LOC106381856, 106349172|LOC106349172, 106438033|LOC106438033, 106349108|LOC106349108, 106412462|LOC106412462, 106391411|LOC106391411, 106382359|LOC106382359, 106451544|LOC106451544, 106381855|LOC106381855, 106364522|LOC106364522, 106414084|LOC106414084, 106349158|LOC106349158, 106449328|LOC106449328, 106451545|LOC10…	0.0759	0.0316012	106361411|LOC106361411, 106349108|LOC106349108, 106412462|LOC106412462, 106364522|LOC106364522, 106414084|LOC106414084, 106353459|LOC106353459, 106388194|LOC106388194, 106393316|LOC106393316, 106414068|LOC106414068, 106452612|LOC106452612, 106391858|LOC106391858	11	106390013|LOC106390013, 106392053|LOC106392053, 106381856|LOC106381856, 106349172|LOC106349172, 106438033|LOC106438033, 106391411|LOC106391411, 106382359|LOC106382359, 106451544|LOC106451544, 106381855|LOC106381855, 106349158|LOC106349158, 106449328|LOC106449328, 106451545|LOC106451545, 106370887|LOC106370887, 106396203|LOC106396203, 106444987|LOC106444987, 106446860|LOC106446860, 106390287|LOC10…	35	432
GO:0005506	iron ion binding	Molecular Function	106377835|LOC106377835, 106353868|LOC106353868, 106355888|LOC106355888, 106446394|LOC106446394, 106406326|LOC106406326, 106352821|LOC106352821, 106410673|LOC106410673, 106377370|LOC106377370, 106377834|LOC106377834, 106387284|LOC106387284, 106347114|LOC106347114, 106348958|LOC106348958, 106408214|LOC106408214, 106385302|LOC106385302, 106403712|LOC106403712, 106380862|LOC106380862, 106439532|LOC10…	0.1063	0.000159488	106387284|LOC106387284, 106439532|LOC106439532, 106385223|LOC106385223, 106353334|LOC106353334, 106381238|LOC106381238, 106445381|LOC106445381, 106383072|LOC106383072	7	106377835|LOC106377835, 106353868|LOC106353868, 106355888|LOC106355888, 106446394|LOC106446394, 106406326|LOC106406326, 106352821|LOC106352821, 106410673|LOC106410673, 106377370|LOC106377370, 106377834|LOC106377834, 106347114|LOC106347114, 106348958|LOC106348958, 106408214|LOC106408214, 106385302|LOC106385302, 106403712|LOC106403712, 106380862|LOC106380862, 106366810|LOC106366810, 106446766|LOC10…	32	293
GO:0003777	microtubule motor activity	Molecular Function	106438835|LOC106438835, 106446112|LOC106446112, 106452671|LOC106452671, 106369053|LOC106369053, 106405981|LOC106405981, 106366022|LOC106366022, 106346903|LOC106346903, 106445745|LOC106445745, 106450917|LOC106450917, 106397794|LOC106397794, 106346912|LOC106346912, 106387357|LOC106387357, 106387508|LOC106387508, 106445717|LOC106445717, 106417089|LOC106417089, 106439713|LOC106439713, 106447376|LOC10…	0.0844	0.0101961	106438835|LOC106438835, 106452671|LOC106452671, 106369053|LOC106369053, 106405981|LOC106405981, 106366022|LOC106366022, 106346903|LOC106346903, 106445745|LOC106445745, 106397794|LOC106397794, 106346912|LOC106346912, 106387357|LOC106387357, 106387508|LOC106387508, 106417089|LOC106417089, 106439713|LOC106439713, 106447376|LOC106447376, 106390754|LOC106390754, 106451909|LOC106451909, 106410762|LOC10…	31	106446112|LOC106446112, 106450917|LOC106450917, 106445717|LOC106445717, 106379256|LOC106379256, 106380450|LOC106380450, 106451102|LOC106451102, 106348911|LOC106348911, 106363844|LOC106363844	8	388
GO:0019843	rRNA binding	Molecular Function	106363404|LOC106363404, 106385303|LOC106385303, 106347825|LOC106347825, 106367635|LOC106367635, 106349373|LOC106349373, 106354529|LOC106354529, 106360543|LOC106360543, 106390715|LOC106390715, 106418337|LOC106418337, 106402595|LOC106402595, 106368211|LOC106368211, 106400795|LOC106400795, 106400920|LOC106400920, 106372291|LOC106372291, 106405949|LOC106405949, 106388299|LOC106388299, 106402581|LOC10…	0.1	0.000630191	106349373|LOC106349373, 106354529|LOC106354529, 106360543|LOC106360543, 106390715|LOC106390715, 106418337|LOC106418337, 106402595|LOC106402595, 106400795|LOC106400795, 106400920|LOC106400920, 106372291|LOC106372291, 106405949|LOC106405949, 106388299|LOC106388299, 106402581|LOC106402581, 106367416|LOC106367416, 106366274|LOC106366274, 106415418|LOC106415418, 106367420|LOC106367420, 106365545|LOC10…	32	106363404|LOC106363404, 106385303|LOC106385303, 106347825|LOC106347825, 106367635|LOC106367635, 106368211|LOC106368211, 106446025|LOC106446025	6	270
GO:0016491	oxidoreductase activity	Molecular Function	106398694|LOC106398694, 106447279|LOC106447279, 106447281|LOC106447281, 106453262|LOC106453262, 106452409|LOC106452409, 106451749|LOC106451749, 106450535|LOC106450535, 106451753|LOC106451753, 106375651|LOC106375651, 106453825|LOC106453825, 106445302|LOC106445302, 106401783|LOC106401783, 106380834|LOC106380834, 106354506|LOC106354506, 106353454|LOC106353454, 106351654|LOC106351654, 106362498|LOC10…	0.0779	0.03591	106447279|LOC106447279, 106447281|LOC106447281, 106445302|LOC106445302, 106445166|LOC106445166, 106349156|LOC106349156	5	106398694|LOC106398694, 106453262|LOC106453262, 106452409|LOC106452409, 106451749|LOC106451749, 106450535|LOC106450535, 106451753|LOC106451753, 106375651|LOC106375651, 106453825|LOC106453825, 106401783|LOC106401783, 106380834|LOC106380834, 106354506|LOC106354506, 106353454|LOC106353454, 106351654|LOC106351654, 106362498|LOC106362498, 106352956|LOC106352956, 106446943|LOC106446943, 106351646|LOC10…	32	370
GO:0005215	transporter activity	Molecular Function	106411135|LOC106411135, 106411192|LOC106411192, 106387179|LOC106387179, 106367429|LOC106367429, 106371093|LOC106371093, 106387178|LOC106387178, 106366161|LOC106366161, 106398102|LOC106398102, 106388161|LOC106388161, 106405453|LOC106405453, 106447526|LOC106447526, 106438025|LOC106438025, 106366160|LOC106366160, 106452225|LOC106452225, 106371827|LOC106371827, 106366752|LOC106366752, 106417192|LOC10…	0.0804	0.0383347	106404745|LOC106404745	1	106411135|LOC106411135, 106411192|LOC106411192, 106387179|LOC106387179, 106367429|LOC106367429, 106371093|LOC106371093, 106387178|LOC106387178, 106366161|LOC106366161, 106398102|LOC106398102, 106388161|LOC106388161, 106405453|LOC106405453, 106447526|LOC106447526, 106438025|LOC106438025, 106366160|LOC106366160, 106452225|LOC106452225, 106371827|LOC106371827, 106366752|LOC106366752, 106417192|LOC10…	29	291
GO:0015293	symporter activity	Molecular Function	106361643|LOC106361643, 106383119|LOC106383119, 106445992|LOC106445992, 106367130|LOC106367130, 106445601|LOC106445601, 106384945|LOC106384945, 106349766|LOC106349766, 106365948|LOC106365948, 106405663|LOC106405663, 106386755|LOC106386755, 106448347|LOC106448347, 106369914|LOC106369914, 106439434|LOC106439434, 106400185|LOC106400185, 106372486|LOC106372486, 106404732|LOC106404732, 106413810|LOC10…	0.0804	0.0383347	106365948|LOC106365948, 106448347|LOC106448347, 106438658|LOC106438658, 106400202|LOC106400202	4	106361643|LOC106361643, 106383119|LOC106383119, 106445992|LOC106445992, 106367130|LOC106367130, 106445601|LOC106445601, 106384945|LOC106384945, 106349766|LOC106349766, 106405663|LOC106405663, 106386755|LOC106386755, 106369914|LOC106369914, 106439434|LOC106439434, 106400185|LOC106400185, 106372486|LOC106372486, 106404732|LOC106404732, 106413810|LOC106413810, 106405733|LOC106405733, 106351886|LOC10…	26	258
GO:0004601	peroxidase activity	Molecular Function	106362760|LOC106362760, 106415904|LOC106415904, 106410977|LOC106410977, 106347720|LOC106347720, 106411786|LOC106411786, 106368738|LOC106368738, 106369164|LOC106369164, 106441213|LOC106441213, 106347881|LOC106347881, 106348958|LOC106348958, 106408214|LOC106408214, 106385302|LOC106385302, 106375482|LOC106375482, 106387911|LOC106387911, 106452491|LOC106452491, 106372244|LOC106372244, 106443611|LOC10…	0.0831	0.0367575	106452491|LOC106452491, 106391590|LOC106391590, 106449128|LOC106449128, 106363975|LOC106363975	4	106362760|LOC106362760, 106415904|LOC106415904, 106410977|LOC106410977, 106347720|LOC106347720, 106411786|LOC106411786, 106368738|LOC106368738, 106369164|LOC106369164, 106441213|LOC106441213, 106347881|LOC106347881, 106348958|LOC106348958, 106408214|LOC106408214, 106385302|LOC106385302, 106375482|LOC106375482, 106387911|LOC106387911, 106372244|LOC106372244, 106443611|LOC106443611, 106383733|LOC10…	22	225
GO:0009414	response to water deprivation	Biological Process	106436104|LOC106436104, 106385360|LOC106385360, 106385182|LOC106385182, 106361839|LOC106361839, 106392257|LOC106392257, 106417365|LOC106417365, 106345884|LOC106345884, 106366343|LOC106366343, 106361838|LOC106361838, 106387931|LOC106387931, 106395965|LOC106395965, 106354399|LOC106354399, 106451021|LOC106451021, 106415904|LOC106415904, 106345698|LOC106345698, 106398710|LOC106398710, 106416234|LOC10…	0.0935	2.25925e-05	106354399|LOC106354399, 106398710|LOC106398710, 106445716|LOC106445716, 106449819|LOC106449819, 106379856|LOC106379856, 106447354|LOC106447354, 106366950|LOC106366950, 106454869|LOC106454869	8	106436104|LOC106436104, 106385360|LOC106385360, 106385182|LOC106385182, 106361839|LOC106361839, 106392257|LOC106392257, 106417365|LOC106417365, 106345884|LOC106345884, 106366343|LOC106366343, 106361838|LOC106361838, 106387931|LOC106387931, 106395965|LOC106395965, 106451021|LOC106451021, 106415904|LOC106415904, 106345698|LOC106345698, 106416234|LOC106416234, 106396262|LOC106396262, 106453499|LOC10…	67	665
GO:0051301	cell division	Biological Process	106446112|LOC106446112, 106354691|LOC106354691, 106431141|LOC106431141, 106369053|LOC106369053, 106451281|LOC106451281, 106382013|LOC106382013, 106377580|LOC106377580, 106415125|LOC106415125, 106366485|LOC106366485, 106451455|LOC106451455, 106366815|LOC106366815, 106366022|LOC106366022, 106354568|LOC106354568, 106346903|LOC106346903, 106346324|LOC106346324, 106450917|LOC106450917, 106427757|LOC10…	0.0713	0.0314615	106354691|LOC106354691, 106431141|LOC106431141, 106369053|LOC106369053, 106451281|LOC106451281, 106377580|LOC106377580, 106415125|LOC106415125, 106451455|LOC106451455, 106366022|LOC106366022, 106354568|LOC106354568, 106346903|LOC106346903, 106346324|LOC106346324, 106427757|LOC106427757, 106415202|LOC106415202, 106413887|LOC106413887, 106347948|LOC106347948, 106387508|LOC106387508, 106401136|LOC10…	58	106446112|LOC106446112, 106382013|LOC106382013, 106366485|LOC106366485, 106366815|LOC106366815, 106450917|LOC106450917, 106445717|LOC106445717, 106411280|LOC106411280, 106351010|LOC106351010, 106354550|LOC106354550, 106382833|LOC106382833, 106394869|LOC106394869, 106452445|LOC106452445, 106397859|LOC106397859, 106381813|LOC106381813, 106406226|LOC106406226	15	850
GO:0009737	response to abscisic acid	Biological Process	106436104|LOC106436104, 106385360|LOC106385360, 106385182|LOC106385182, 106361839|LOC106361839, 106392257|LOC106392257, 106417365|LOC106417365, 106345884|LOC106345884, 106366343|LOC106366343, 106361838|LOC106361838, 106387931|LOC106387931, 106354399|LOC106354399, 106415904|LOC106415904, 106398710|LOC106398710, 106416234|LOC106416234, 106446161|LOC106446161, 106397015|LOC106397015, 106347720|LOC10…	0.0713	0.0444507	106354399|LOC106354399, 106398710|LOC106398710, 106397015|LOC106397015, 106442054|LOC106442054, 106450887|LOC106450887, 106353355|LOC106353355, 106391527|LOC106391527, 106396414|LOC106396414, 106435924|LOC106435924, 106454869|LOC106454869, 106347021|LOC106347021, 106383053|LOC106383053, 106436584|LOC106436584, 106385189|LOC106385189	14	106436104|LOC106436104, 106385360|LOC106385360, 106385182|LOC106385182, 106361839|LOC106361839, 106392257|LOC106392257, 106417365|LOC106417365, 106345884|LOC106345884, 106366343|LOC106366343, 106361838|LOC106361838, 106387931|LOC106387931, 106415904|LOC106415904, 106416234|LOC106416234, 106446161|LOC106446161, 106347720|LOC106347720, 106412054|LOC106412054, 106354188|LOC106354188, 106353550|LOC10…	48	713
GO:0080167	response to karrikin	Biological Process	106447279|LOC106447279, 106453198|LOC106453198, 106447281|LOC106447281, 106437590|LOC106437590, 106398793|LOC106398793, 106388514|LOC106388514, 106411192|LOC106411192, 106388513|LOC106388513, 106391500|LOC106391500, 106446073|LOC106446073, 106387868|LOC106387868, 106366161|LOC106366161, 106371447|LOC106371447, 106371451|LOC106371451, 106371449|LOC106371449, 106348399|LOC106348399, 106387303|LOC10…	0.1379	4.20878e-10	106447279|LOC106447279, 106447281|LOC106447281, 106446073|LOC106446073, 106387303|LOC106387303, 106385280|LOC106385280, 106385813|LOC106385813, 106358420|LOC106358420, 106346706|LOC106346706, 106438378|LOC106438378, 106447234|LOC106447234, 106375447|LOC106375447, 106413952|LOC106413952, 106400894|LOC106400894, 106445166|LOC106445166, 106414742|LOC106414742, 106350097|LOC106350097, 106401505|LOC10…	19	106453198|LOC106453198, 106437590|LOC106437590, 106398793|LOC106398793, 106388514|LOC106388514, 106411192|LOC106411192, 106388513|LOC106388513, 106391500|LOC106391500, 106387868|LOC106387868, 106366161|LOC106366161, 106371447|LOC106371447, 106371451|LOC106371451, 106371449|LOC106371449, 106348399|LOC106348399, 106405453|LOC106405453, 106382579|LOC106382579, 106389127|LOC106389127, 106372575|LOC10…	40	348
GO:0006334	nucleosome assembly	Biological Process	106366424|LOC106366424, 106447366|LOC106447366, 106438342|LOC106438342, 106386836|LOC106386836, 106451409|LOC106451409, 106445474|LOC106445474, 106415036|LOC106415036, 106386867|LOC106386867, 106415078|LOC106415078, 106438345|LOC106438345, 106436220|LOC106436220, 106371632|LOC106371632, 106402456|LOC106402456, 106451851|LOC106451851, 106396045|LOC106396045, 106392865|LOC106392865, 106453164|LOC10…	0.2618	5.0748e-20	106447366|LOC106447366, 106438342|LOC106438342, 106386836|LOC106386836, 106451409|LOC106451409, 106445474|LOC106445474, 106415036|LOC106415036, 106386867|LOC106386867, 106415078|LOC106415078, 106438345|LOC106438345, 106436220|LOC106436220, 106371632|LOC106371632, 106402456|LOC106402456, 106451851|LOC106451851, 106396045|LOC106396045, 106392865|LOC106392865, 106453164|LOC106453164, 106346382|LOC10…	47	106366424|LOC106366424, 106443096|LOC106443096, 106346354|LOC106346354	3	156
GO:0006979	response to oxidative stress	Biological Process	106395965|LOC106395965, 106451021|LOC106451021, 106398793|LOC106398793, 106415904|LOC106415904, 106396262|LOC106396262, 106388514|LOC106388514, 106354666|LOC106354666, 106388513|LOC106388513, 106446161|LOC106446161, 106401696|LOC106401696, 106347720|LOC106347720, 106391500|LOC106391500, 106375651|LOC106375651, 106368738|LOC106368738, 106371447|LOC106371447, 106380476|LOC106380476, 106371451|LOC10…	0.1002	9.40582e-05	106354666|LOC106354666, 106451864|LOC106451864, 106411198|LOC106411198, 106445991|LOC106445991, 106396176|LOC106396176, 106437732|LOC106437732, 106446718|LOC106446718, 106414754|LOC106414754	8	106395965|LOC106395965, 106451021|LOC106451021, 106398793|LOC106398793, 106415904|LOC106415904, 106396262|LOC106396262, 106388514|LOC106388514, 106388513|LOC106388513, 106446161|LOC106446161, 106401696|LOC106401696, 106347720|LOC106347720, 106391500|LOC106391500, 106375651|LOC106375651, 106368738|LOC106368738, 106371447|LOC106371447, 106380476|LOC106380476, 106371451|LOC106371451, 106371449|LOC10…	42	375
GO:0009611	response to wounding	Biological Process	106377835|LOC106377835, 106353868|LOC106353868, 106355888|LOC106355888, 106406326|LOC106406326, 106445910|LOC106445910, 106445252|LOC106445252, 106353656|LOC106353656, 106403316|LOC106403316, 106448212|LOC106448212, 106453499|LOC106453499, 106353244|LOC106353244, 106377834|LOC106377834, 106451636|LOC106451636, 106348958|LOC106348958, 106408214|LOC106408214, 106363590|LOC106363590, 106451864|LOC10…	0.0889	0.00158816	106451864|LOC106451864, 106391527|LOC106391527, 106400507|LOC106400507, 106353334|LOC106353334, 106383072|LOC106383072, 106439976|LOC106439976, 106445398|LOC106445398	7	106377835|LOC106377835, 106353868|LOC106353868, 106355888|LOC106355888, 106406326|LOC106406326, 106445910|LOC106445910, 106445252|LOC106445252, 106353656|LOC106353656, 106403316|LOC106403316, 106448212|LOC106448212, 106453499|LOC106453499, 106353244|LOC106353244, 106377834|LOC106377834, 106451636|LOC106451636, 106348958|LOC106348958, 106408214|LOC106408214, 106363590|LOC106363590, 106445251|LOC10…	42	429
GO:0009753	response to jasmonic acid	Biological Process	106377835|LOC106377835, 106353868|LOC106353868, 106355888|LOC106355888, 106406326|LOC106406326, 106445910|LOC106445910, 106445252|LOC106445252, 106401061|LOC106401061, 106353656|LOC106353656, 106448212|LOC106448212, 106453499|LOC106453499, 106386846|LOC106386846, 106353244|LOC106353244, 106377834|LOC106377834, 106452069|LOC106452069, 106441125|LOC106441125, 106363590|LOC106363590, 106445251|LOC10…	0.0957	0.000546373	106449819|LOC106449819, 106353334|LOC106353334, 106454869|LOC106454869, 106383072|LOC106383072, 106375036|LOC106375036, 106399326|LOC106399326	6	106377835|LOC106377835, 106353868|LOC106353868, 106355888|LOC106355888, 106406326|LOC106406326, 106445910|LOC106445910, 106445252|LOC106445252, 106401061|LOC106401061, 106353656|LOC106353656, 106448212|LOC106448212, 106453499|LOC106453499, 106386846|LOC106386846, 106353244|LOC106353244, 106377834|LOC106377834, 106452069|LOC106452069, 106441125|LOC106441125, 106363590|LOC106363590, 106445251|LOC10…	39	380
GO:0007018	microtubule-based movement	Biological Process	106438835|LOC106438835, 106446112|LOC106446112, 106452671|LOC106452671, 106369053|LOC106369053, 106405981|LOC106405981, 106451512|LOC106451512, 106366022|LOC106366022, 106346903|LOC106346903, 106445745|LOC106445745, 106450917|LOC106450917, 106397794|LOC106397794, 106446933|LOC106446933, 106346912|LOC106346912, 106387357|LOC106387357, 106387508|LOC106387508, 106445717|LOC106445717, 106417089|LOC10…	0.0832	0.0100841	106438835|LOC106438835, 106452671|LOC106452671, 106369053|LOC106369053, 106405981|LOC106405981, 106451512|LOC106451512, 106366022|LOC106366022, 106346903|LOC106346903, 106445745|LOC106445745, 106397794|LOC106397794, 106446933|LOC106446933, 106346912|LOC106346912, 106387357|LOC106387357, 106387508|LOC106387508, 106417089|LOC106417089, 106439713|LOC106439713, 106447376|LOC106447376, 106390754|LOC10…	34	106446112|LOC106446112, 106450917|LOC106450917, 106445717|LOC106445717, 106379256|LOC106379256, 106380450|LOC106380450, 106451102|LOC106451102, 106348911|LOC106348911, 106363844|LOC106363844	8	416
GO:0009408	response to heat	Biological Process	106415904|LOC106415904, 106354344|LOC106354344, 106347720|LOC106347720, 106394994|LOC106394994, 106402021|LOC106402021, 106354381|LOC106354381, 106401075|LOC106401075, 106348958|LOC106348958, 106408214|LOC106408214, 106451510|LOC106451510, 106451511|LOC106451511, 106446972|LOC106446972, 106377472|LOC106377472, 106354342|LOC106354342, 106357615|LOC106357615, 106360686|LOC106360686, 106438703|LOC10…	0.0837	0.0125794	106401075|LOC106401075, 106367031|LOC106367031, 106389033|LOC106389033	3	106415904|LOC106415904, 106354344|LOC106354344, 106347720|LOC106347720, 106394994|LOC106394994, 106402021|LOC106402021, 106354381|LOC106354381, 106348958|LOC106348958, 106408214|LOC106408214, 106451510|LOC106451510, 106451511|LOC106451511, 106446972|LOC106446972, 106377472|LOC106377472, 106354342|LOC106354342, 106357615|LOC106357615, 106360686|LOC106360686, 106438703|LOC106438703, 106368579|LOC10…	35	361
GO:0009416	response to light stimulus	Biological Process	106405982|LOC106405982, 106371482|LOC106371482, 106382631|LOC106382631, 106429334|LOC106429334, 106402824|LOC106402824, 106375396|LOC106375396, 106436451|LOC106436451, 106390883|LOC106390883, 106451221|LOC106451221, 106429326|LOC106429326, 106397919|LOC106397919, 106429344|LOC106429344, 106448075|LOC106448075, 106372522|LOC106372522, 106370339|LOC106370339, 106402315|LOC106402315, 106410853|LOC10…	0.0921	0.0039395	106405982|LOC106405982, 106371482|LOC106371482, 106429334|LOC106429334, 106402824|LOC106402824, 106375396|LOC106375396, 106436451|LOC106436451, 106390883|LOC106390883, 106451221|LOC106451221, 106429326|LOC106429326, 106397919|LOC106397919, 106429344|LOC106429344, 106448075|LOC106448075, 106402315|LOC106402315, 106410853|LOC106410853, 106405878|LOC106405878, 106444389|LOC106444389, 106405876|LOC10…	28	106382631|LOC106382631, 106372522|LOC106372522, 106370339|LOC106370339, 106375246|LOC106375246, 106396655|LOC106396655, 106412480|LOC106412480, 106450461|LOC106450461	7	321
GO:0048366	leaf development	Biological Process	106400977|LOC106400977, 106439393|LOC106439393, 106362442|LOC106362442, 106389193|LOC106389193, 106410858|LOC106410858, 106401064|LOC106401064, 106451371|LOC106451371, 106349336|LOC106349336, 106385580|LOC106385580, 106372076|LOC106372076, 106389639|LOC106389639, 106359455|LOC106359455, 106389719|LOC106389719, 106377073|LOC106377073, 106377850|LOC106377850, 106412096|LOC106412096, 106370903|LOC10…	0.0863	0.0139724	106400977|LOC106400977, 106439393|LOC106439393, 106362442|LOC106362442, 106389193|LOC106389193, 106410858|LOC106410858, 106401064|LOC106401064, 106451371|LOC106451371, 106349336|LOC106349336, 106385580|LOC106385580, 106372076|LOC106372076, 106359455|LOC106359455, 106412096|LOC106412096, 106370903|LOC106370903, 106404922|LOC106404922, 106438308|LOC106438308, 106381238|LOC106381238, 106368494|LOC10…	25	106389639|LOC106389639, 106389719|LOC106389719, 106377073|LOC106377073, 106377850|LOC106377850, 106380873|LOC106380873, 106416508|LOC106416508, 106354844|LOC106354844	7	307
GO:0006869	lipid transport	Biological Process	106436104|LOC106436104, 106385360|LOC106385360, 106385182|LOC106385182, 106361839|LOC106361839, 106417365|LOC106417365, 106345884|LOC106345884, 106361838|LOC106361838, 106387931|LOC106387931, 106451951|LOC106451951, 106360912|LOC106360912, 106360514|LOC106360514, 106444113|LOC106444113, 106389568|LOC106389568, 106449774|LOC106449774, 106363215|LOC106363215, 106379856|LOC106379856, 106418374|LOC10…	0.1174	0.00020123	106389568|LOC106389568, 106449774|LOC106449774, 106363215|LOC106363215, 106379856|LOC106379856, 106418374|LOC106418374, 106443821|LOC106443821, 106418375|LOC106418375, 106444734|LOC106444734, 106346518|LOC106346518, 106446416|LOC106446416, 106367749|LOC106367749, 106346516|LOC106346516	12	106436104|LOC106436104, 106385360|LOC106385360, 106385182|LOC106385182, 106361839|LOC106361839, 106417365|LOC106417365, 106345884|LOC106345884, 106361838|LOC106361838, 106387931|LOC106387931, 106451951|LOC106451951, 106360912|LOC106360912, 106360514|LOC106360514, 106444113|LOC106444113, 106374610|LOC106374610, 106452729|LOC106452729, 106382927|LOC106382927, 106396912|LOC106396912, 106411542|LOC10…	17	199
GO:0006633	fatty acid biosynthetic process	Biological Process	106366808|LOC106366808, 106381762|LOC106381762, 106453012|LOC106453012, 106453262|LOC106453262, 106452409|LOC106452409, 106387284|LOC106387284, 106347114|LOC106347114, 106381763|LOC106381763, 106358599|LOC106358599, 106409944|LOC106409944, 106385223|LOC106385223, 106370166|LOC106370166, 106397919|LOC106397919, 106445421|LOC106445421, 106416078|LOC106416078, 106366810|LOC106366810, 106382155|LOC10…	0.0806	0.0404166	106381762|LOC106381762, 106453012|LOC106453012, 106387284|LOC106387284, 106381763|LOC106381763, 106358599|LOC106358599, 106409944|LOC106409944, 106385223|LOC106385223, 106370166|LOC106370166, 106397919|LOC106397919, 106445421|LOC106445421, 106400507|LOC106400507, 106389421|LOC106389421, 106380841|LOC106380841, 106399300|LOC106399300, 106393937|LOC106393937, 106359386|LOC106359386, 106441129|LOC10…	21	106366808|LOC106366808, 106453262|LOC106453262, 106452409|LOC106452409, 106347114|LOC106347114, 106416078|LOC106416078, 106366810|LOC106366810, 106382155|LOC106382155, 106395025|LOC106395025	8	282
GO:0009617	response to bacterium	Biological Process	106377835|LOC106377835, 106353868|LOC106353868, 106355888|LOC106355888, 106406326|LOC106406326, 106382158|LOC106382158, 106354802|LOC106354802, 106377370|LOC106377370, 106377834|LOC106377834, 106361386|LOC106361386, 106382159|LOC106382159, 106372476|LOC106372476, 106390617|LOC106390617, 106407191|LOC106407191, 106403712|LOC106403712, 106380862|LOC106380862, 106377472|LOC106377472, 106377836|LOC10…	0.1687	2.59888e-07	106354802|LOC106354802, 106361386|LOC106361386, 106353334|LOC106353334, 106383072|LOC106383072	4	106377835|LOC106377835, 106353868|LOC106353868, 106355888|LOC106355888, 106406326|LOC106406326, 106382158|LOC106382158, 106377370|LOC106377370, 106377834|LOC106377834, 106382159|LOC106382159, 106372476|LOC106372476, 106390617|LOC106390617, 106407191|LOC106407191, 106403712|LOC106403712, 106380862|LOC106380862, 106377472|LOC106377472, 106377836|LOC106377836, 106390621|LOC106390621, 106388001|LOC10…	24	129
GO:0006857	oligopeptide transport	Biological Process	106411192|LOC106411192, 106367429|LOC106367429, 106371093|LOC106371093, 106361643|LOC106361643, 106366161|LOC106366161, 106445992|LOC106445992, 106388161|LOC106388161, 106405453|LOC106405453, 106367130|LOC106367130, 106447526|LOC106447526, 106438025|LOC106438025, 106445601|LOC106445601, 106366160|LOC106366160, 106452225|LOC106452225, 106405663|LOC106405663, 106417192|LOC106417192, 106391597|LOC10…	0.1212	0.000150088		0	106411192|LOC106411192, 106367429|LOC106367429, 106371093|LOC106371093, 106361643|LOC106361643, 106366161|LOC106366161, 106445992|LOC106445992, 106388161|LOC106388161, 106405453|LOC106405453, 106367130|LOC106367130, 106447526|LOC106447526, 106438025|LOC106438025, 106445601|LOC106445601, 106366160|LOC106366160, 106452225|LOC106452225, 106405663|LOC106405663, 106417192|LOC106417192, 106391597|LOC10…	28	178
GO:0009624	response to nematode	Biological Process	106371093|LOC106371093, 106348818|LOC106348818, 106418413|LOC106418413, 106440084|LOC106440084, 106410606|LOC106410606, 106387938|LOC106387938, 106402812|LOC106402812, 106450947|LOC106450947, 106377540|LOC106377540, 106405954|LOC106405954, 106371827|LOC106371827, 106405663|LOC106405663, 106390733|LOC106390733, 106371286|LOC106371286, 106417192|LOC106417192, 106406929|LOC106406929, 106365730|LOC10…	0.0927	0.00839743	106348818|LOC106348818, 106387938|LOC106387938, 106402812|LOC106402812, 106390733|LOC106390733, 106407503|LOC106407503, 106445654|LOC106445654, 106412226|LOC106412226	7	106371093|LOC106371093, 106418413|LOC106418413, 106440084|LOC106440084, 106410606|LOC106410606, 106450947|LOC106450947, 106377540|LOC106377540, 106405954|LOC106405954, 106371827|LOC106371827, 106405663|LOC106405663, 106371286|LOC106371286, 106417192|LOC106417192, 106406929|LOC106406929, 106365730|LOC106365730, 106451342|LOC106451342, 106395734|LOC106395734, 106371501|LOC106371501, 106395514|LOC10…	21	242
GO:0009644	response to high light intensity	Biological Process	106354344|LOC106354344, 106354381|LOC106354381, 106451510|LOC106451510, 106451511|LOC106451511, 106446972|LOC106446972, 106377472|LOC106377472, 106354342|LOC106354342, 106357615|LOC106357615, 106451821|LOC106451821, 106387209|LOC106387209, 106451820|LOC106451820, 106423776|LOC106423776, 106451533|LOC106451533, 106453698|LOC106453698, 106353095|LOC106353095, 106401239|LOC106401239, 106450047|LOC10…	0.1592	3.27436e-06	106423776|LOC106423776	1	106354344|LOC106354344, 106354381|LOC106354381, 106451510|LOC106451510, 106451511|LOC106451511, 106446972|LOC106446972, 106377472|LOC106377472, 106354342|LOC106354342, 106357615|LOC106357615, 106451821|LOC106451821, 106387209|LOC106387209, 106451820|LOC106451820, 106451533|LOC106451533, 106453698|LOC106453698, 106353095|LOC106353095, 106401239|LOC106401239, 106450047|LOC106450047, 106451531|LOC10…	24	130
GO:0009058	biosynthetic process	Biological Process	106381605|LOC106381605, 106398793|LOC106398793, 106445910|LOC106445910, 106445252|LOC106445252, 106388514|LOC106388514, 106388513|LOC106388513, 106448212|LOC106448212, 106353244|LOC106353244, 106391500|LOC106391500, 106402185|LOC106402185, 106445251|LOC106445251, 106407297|LOC106407297, 106410155|LOC106410155, 106394680|LOC106394680, 106388515|LOC106388515, 106377171|LOC106377171, 106430056|LOC10…	0.1479	1.23723e-05		0	106381605|LOC106381605, 106398793|LOC106398793, 106445910|LOC106445910, 106445252|LOC106445252, 106388514|LOC106388514, 106388513|LOC106388513, 106448212|LOC106448212, 106353244|LOC106353244, 106391500|LOC106391500, 106402185|LOC106402185, 106445251|LOC106445251, 106407297|LOC106407297, 106410155|LOC106410155, 106394680|LOC106394680, 106388515|LOC106388515, 106377171|LOC106377171, 106430056|LOC10…	25	140
GO:0042542	response to hydrogen peroxide	Biological Process	106354344|LOC106354344, 106354381|LOC106354381, 106451510|LOC106451510, 106451511|LOC106451511, 106446972|LOC106446972, 106377472|LOC106377472, 106354342|LOC106354342, 106357615|LOC106357615, 106387209|LOC106387209, 106451533|LOC106451533, 106415050|LOC106415050, 106453698|LOC106453698, 106353095|LOC106353095, 106401239|LOC106401239, 106450047|LOC106450047, 106451531|LOC106451531, 106377322|LOC10…	0.1517	2.68971e-05	106415050|LOC106415050	1	106354344|LOC106354344, 106354381|LOC106354381, 106451510|LOC106451510, 106451511|LOC106451511, 106446972|LOC106446972, 106377472|LOC106377472, 106354342|LOC106354342, 106357615|LOC106357615, 106387209|LOC106387209, 106451533|LOC106451533, 106453698|LOC106453698, 106353095|LOC106353095, 106401239|LOC106401239, 106450047|LOC106450047, 106451531|LOC106451531, 106377322|LOC106377322, 106351544|LOC10…	21	123
GO:0009615	response to virus	Biological Process	106354526|LOC106354526, 106412054|LOC106412054, 106356004|LOC106356004, 106452809|LOC106452809, 106377472|LOC106377472, 106345588|LOC106345588, 106452810|LOC106452810, 106360686|LOC106360686, 106377073|LOC106377073, 106390544|LOC106390544, 106404258|LOC106404258, 106396097|LOC106396097, 106369087|LOC106369087, 106353095|LOC106353095, 106401239|LOC106401239, 106438996|LOC106438996, 106373632|LOC10…	0.1382	0.000160228	106354526|LOC106354526, 106356004|LOC106356004, 106369087|LOC106369087, 106441766|LOC106441766	4	106412054|LOC106412054, 106452809|LOC106452809, 106377472|LOC106377472, 106345588|LOC106345588, 106452810|LOC106452810, 106360686|LOC106360686, 106377073|LOC106377073, 106390544|LOC106390544, 106404258|LOC106404258, 106396097|LOC106396097, 106353095|LOC106353095, 106401239|LOC106401239, 106438996|LOC106438996, 106373632|LOC106373632, 106351544|LOC106351544, 106347335|LOC106347335, 106392211|LOC10…	17	116
GO:0009555	pollen development	Biological Process	106437590|LOC106437590, 106398793|LOC106398793, 106349206|LOC106349206, 106388514|LOC106388514, 106388513|LOC106388513, 106391500|LOC106391500, 106387868|LOC106387868, 106438778|LOC106438778, 106409004|LOC106409004, 106348399|LOC106348399, 106404152|LOC106404152, 106368228|LOC106368228, 106346666|LOC106346666, 106388515|LOC106388515, 106450509|LOC106450509, 106387293|LOC106387293, 106449297|LOC10…	0.0861	0.0409212	106438778|LOC106438778, 106404152|LOC106404152, 106450509|LOC106450509, 106387293|LOC106387293, 106449297|LOC106449297, 106368326|LOC106368326, 106365950|LOC106365950	7	106437590|LOC106437590, 106398793|LOC106398793, 106349206|LOC106349206, 106388514|LOC106388514, 106388513|LOC106388513, 106391500|LOC106391500, 106387868|LOC106387868, 106409004|LOC106409004, 106348399|LOC106348399, 106368228|LOC106368228, 106346666|LOC106346666, 106388515|LOC106388515, 106384062|LOC106384062, 106387869|LOC106387869	14	195
GO:0009723	response to ethylene	Biological Process	106386846|LOC106386846, 106441125|LOC106441125, 106449819|LOC106449819, 106375778|LOC106375778, 106452809|LOC106452809, 106452810|LOC106452810, 106452390|LOC106452390, 106380184|LOC106380184, 106380107|LOC106380107, 106390652|LOC106390652, 106404922|LOC106404922, 106438996|LOC106438996, 106439835|LOC106439835, 106404904|LOC106404904, 106385519|LOC106385519, 106365331|LOC106365331, 106348872|LOC10…	0.0901	0.0301274	106449819|LOC106449819, 106375778|LOC106375778, 106404922|LOC106404922, 106348872|LOC106348872	4	106386846|LOC106386846, 106441125|LOC106441125, 106452809|LOC106452809, 106452810|LOC106452810, 106452390|LOC106452390, 106380184|LOC106380184, 106380107|LOC106380107, 106390652|LOC106390652, 106438996|LOC106438996, 106439835|LOC106439835, 106404904|LOC106404904, 106385519|LOC106385519, 106365331|LOC106365331, 106366650|LOC106366650, 106450471|LOC106450471, 106385457|LOC106385457	16	181
GO:0080027	response to herbivore	Biological Process	106377835|LOC106377835, 106353868|LOC106353868, 106355888|LOC106355888, 106370686|LOC106370686, 106406326|LOC106406326, 106360628|LOC106360628, 106351474|LOC106351474, 106377834|LOC106377834, 106403712|LOC106403712, 106452809|LOC106452809, 106380862|LOC106380862, 106452810|LOC106452810, 106377836|LOC106377836, 106454060|LOC106454060, 106452209|LOC106452209, 106353334|LOC106353334, 106438996|LOC10…	0.4043	3.35787e-12	106452209|LOC106452209, 106353334|LOC106353334, 106383072|LOC106383072, 106452208|LOC106452208	4	106377835|LOC106377835, 106353868|LOC106353868, 106355888|LOC106355888, 106370686|LOC106370686, 106406326|LOC106406326, 106360628|LOC106360628, 106351474|LOC106351474, 106377834|LOC106377834, 106403712|LOC106403712, 106452809|LOC106452809, 106380862|LOC106380862, 106452810|LOC106452810, 106377836|LOC106377836, 106454060|LOC106454060, 106438996|LOC106438996	15	42
GO:0046274	lignin catabolic process	Biological Process	106398793|LOC106398793, 106388514|LOC106388514, 106388513|LOC106388513, 106385758|LOC106385758, 106391500|LOC106391500, 106372627|LOC106372627, 106441311|LOC106441311, 106354757|LOC106354757, 106387653|LOC106387653, 106354122|LOC106354122, 106388515|LOC106388515, 106446093|LOC106446093, 106362013|LOC106362013, 106406699|LOC106406699, 106402805|LOC106402805, 106384062|LOC106384062, 106451062|LOC10…	0.3016	1.22134e-09	106387653|LOC106387653, 106362013|LOC106362013	2	106398793|LOC106398793, 106388514|LOC106388514, 106388513|LOC106388513, 106385758|LOC106385758, 106391500|LOC106391500, 106372627|LOC106372627, 106441311|LOC106441311, 106354757|LOC106354757, 106354122|LOC106354122, 106388515|LOC106388515, 106446093|LOC106446093, 106406699|LOC106406699, 106402805|LOC106402805, 106384062|LOC106384062, 106451062|LOC106451062, 106345463|LOC106345463, 106360585|LOC10…	17	41
GO:0048046	apoplast	Cellular Component	106436104|LOC106436104, 106385360|LOC106385360, 106385182|LOC106385182, 106361839|LOC106361839, 106345884|LOC106345884, 106387931|LOC106387931, 106415318|LOC106415318, 106453029|LOC106453029, 106451769|LOC106451769, 106415904|LOC106415904, 106447616|LOC106447616, 106366310|LOC106366310, 106401061|LOC106401061, 106410133|LOC106410133, 106397590|LOC106397590, 106354526|LOC106354526, 106438967|LOC10…	0.0855	2.20588e-05	106453029|LOC106453029, 106451769|LOC106451769, 106397590|LOC106397590, 106354526|LOC106354526, 106442054|LOC106442054, 106381804|LOC106381804, 106356004|LOC106356004, 106380526|LOC106380526, 106353773|LOC106353773, 106357861|LOC106357861, 106361248|LOC106361248, 106387653|LOC106387653, 106402417|LOC106402417, 106360718|LOC106360718, 106396176|LOC106396176, 106406147|LOC106406147, 106452491|LOC10…	36	106436104|LOC106436104, 106385360|LOC106385360, 106385182|LOC106385182, 106361839|LOC106361839, 106345884|LOC106345884, 106387931|LOC106387931, 106415318|LOC106415318, 106415904|LOC106415904, 106447616|LOC106447616, 106366310|LOC106366310, 106401061|LOC106401061, 106410133|LOC106410133, 106438967|LOC106438967, 106385758|LOC106385758, 106347720|LOC106347720, 106453054|LOC106453054, 106347075|LOC10…	72	960
GO:0009570	chloroplast stroma	Cellular Component	106377835|LOC106377835, 106366808|LOC106366808, 106353868|LOC106353868, 106438690|LOC106438690, 106355888|LOC106355888, 106453218|LOC106453218, 106381762|LOC106381762, 106354788|LOC106354788, 106406326|LOC106406326, 106389628|LOC106389628, 106397587|LOC106397587, 106354685|LOC106354685, 106415904|LOC106415904, 106447616|LOC106447616, 106401061|LOC106401061, 106387748|LOC106387748, 106451656|LOC10…	0.0776	0.00165892	106438690|LOC106438690, 106381762|LOC106381762, 106354788|LOC106354788, 106389628|LOC106389628, 106397587|LOC106397587, 106354685|LOC106354685, 106451656|LOC106451656, 106381763|LOC106381763, 106380526|LOC106380526, 106366108|LOC106366108, 106354529|LOC106354529, 106382144|LOC106382144, 106361248|LOC106361248, 106418337|LOC106418337, 106375787|LOC106375787, 106381999|LOC106381999, 106400795|LOC10…	63	106377835|LOC106377835, 106366808|LOC106366808, 106353868|LOC106353868, 106355888|LOC106355888, 106453218|LOC106453218, 106406326|LOC106406326, 106415904|LOC106415904, 106447616|LOC106447616, 106401061|LOC106401061, 106387748|LOC106387748, 106438967|LOC106438967, 106377834|LOC106377834, 106347720|LOC106347720, 106387749|LOC106387749, 106415012|LOC106415012, 106397664|LOC106397664, 106440038|LOC10…	32	1035
GO:0009941	chloroplast envelope	Cellular Component	106377835|LOC106377835, 106353868|LOC106353868, 106355888|LOC106355888, 106415318|LOC106415318, 106381762|LOC106381762, 106406326|LOC106406326, 106416095|LOC106416095, 106451656|LOC106451656, 106366484|LOC106366484, 106377834|LOC106377834, 106438778|LOC106438778, 106415012|LOC106415012, 106381763|LOC106381763, 106452368|LOC106452368, 106440437|LOC106440437, 106396511|LOC106396511, 106380526|LOC10…	0.0728	0.02588	106381762|LOC106381762, 106451656|LOC106451656, 106438778|LOC106438778, 106381763|LOC106381763, 106440437|LOC106440437, 106380526|LOC106380526, 106354529|LOC106354529, 106361248|LOC106361248, 106360543|LOC106360543, 106418337|LOC106418337, 106368044|LOC106368044, 106445128|LOC106445128, 106375787|LOC106375787, 106400795|LOC106400795, 106406147|LOC106406147, 106396414|LOC106396414, 106452491|LOC10…	41	106377835|LOC106377835, 106353868|LOC106353868, 106355888|LOC106355888, 106415318|LOC106415318, 106406326|LOC106406326, 106416095|LOC106416095, 106366484|LOC106366484, 106377834|LOC106377834, 106415012|LOC106415012, 106452368|LOC106452368, 106396511|LOC106396511, 106381340|LOC106381340, 106403712|LOC106403712, 106380862|LOC106380862, 106372522|LOC106372522, 106439834|LOC106439834, 106377836|LOC10…	26	760
GO:0000786	nucleosome	Cellular Component	106366424|LOC106366424, 106447366|LOC106447366, 106438342|LOC106438342, 106386836|LOC106386836, 106451409|LOC106451409, 106445474|LOC106445474, 106415036|LOC106415036, 106386867|LOC106386867, 106415078|LOC106415078, 106438345|LOC106438345, 106436220|LOC106436220, 106371632|LOC106371632, 106402456|LOC106402456, 106451851|LOC106451851, 106396045|LOC106396045, 106392865|LOC106392865, 106453164|LOC10…	0.2757	1.76374e-21	106447366|LOC106447366, 106438342|LOC106438342, 106386836|LOC106386836, 106451409|LOC106451409, 106445474|LOC106445474, 106415036|LOC106415036, 106386867|LOC106386867, 106415078|LOC106415078, 106438345|LOC106438345, 106436220|LOC106436220, 106371632|LOC106371632, 106402456|LOC106402456, 106451851|LOC106451851, 106396045|LOC106396045, 106392865|LOC106392865, 106453164|LOC106453164, 106346382|LOC10…	48	106366424|LOC106366424, 106443096|LOC106443096, 106346354|LOC106346354	3	154
GO:0005840	ribosome	Cellular Component	106433407|LOC106433407, 106451134|LOC106451134, 106366814|LOC106366814, 106386629|LOC106386629, 106354685|LOC106354685, 106372176|LOC106372176, 106385303|LOC106385303, 106400581|LOC106400581, 106349373|LOC106349373, 106367372|LOC106367372, 106416228|LOC106416228, 106382144|LOC106382144, 106360543|LOC106360543, 106390715|LOC106390715, 106418337|LOC106418337, 106402752|LOC106402752, 106368044|LOC10…	0.1175	2.62746e-06	106433407|LOC106433407, 106451134|LOC106451134, 106354685|LOC106354685, 106372176|LOC106372176, 106400581|LOC106400581, 106349373|LOC106349373, 106416228|LOC106416228, 106382144|LOC106382144, 106360543|LOC106360543, 106390715|LOC106390715, 106418337|LOC106418337, 106368044|LOC106368044, 106402595|LOC106402595, 106400795|LOC106400795, 106405949|LOC106405949, 106388299|LOC106388299, 106402581|LOC10…	41	106366814|LOC106366814, 106386629|LOC106386629, 106385303|LOC106385303, 106367372|LOC106367372, 106402752|LOC106402752, 106451484|LOC106451484	6	301
GO:0005887	integral component of plasma membrane	Cellular Component	106372317|LOC106372317, 106401005|LOC106401005, 106400948|LOC106400948, 106366041|LOC106366041, 106410477|LOC106410477, 106384945|LOC106384945, 106384033|LOC106384033, 106347359|LOC106347359, 106387911|LOC106387911, 106384025|LOC106384025, 106376575|LOC106376575, 106383733|LOC106383733, 106395514|LOC106395514, 106400952|LOC106400952, 106345627|LOC106345627, 106390625|LOC106390625	0.1	0.0211645	106347359|LOC106347359, 106390625|LOC106390625	2	106372317|LOC106372317, 106401005|LOC106401005, 106400948|LOC106400948, 106366041|LOC106366041, 106410477|LOC106410477, 106384945|LOC106384945, 106384033|LOC106384033, 106387911|LOC106387911, 106384025|LOC106384025, 106376575|LOC106376575, 106383733|LOC106383733, 106395514|LOC106395514, 106400952|LOC106400952, 106345627|LOC106345627	14	117
GO:0012505	endomembrane system	Cellular Component	106352568|LOC106352568, 106346324|LOC106346324, 106415202|LOC106415202, 106451762|LOC106451762, 106385051|LOC106385051, 106385049|LOC106385049, 106355430|LOC106355430, 106362294|LOC106362294, 106440711|LOC106440711, 106440710|LOC106440710, 106362319|LOC106362319, 106362318|LOC106362318, 106383209|LOC106383209, 106442708|LOC106442708, 106396235|LOC106396235	0.2	1.89832e-05	106346324|LOC106346324, 106415202|LOC106415202, 106451762|LOC106451762, 106385051|LOC106385051, 106385049|LOC106385049, 106362294|LOC106362294, 106362319|LOC106362319, 106362318|LOC106362318, 106383209|LOC106383209	9	106352568|LOC106352568, 106355430|LOC106355430, 106440711|LOC106440711, 106440710|LOC106440710, 106442708|LOC106442708, 106396235|LOC106396235	6	62
GO:0009579	thylakoid	Cellular Component	106354685|LOC106354685, 106415904|LOC106415904, 106400535|LOC106400535, 106346112|LOC106346112, 106400536|LOC106400536, 106347720|LOC106347720, 106452368|LOC106452368, 106366108|LOC106366108, 106352831|LOC106352831, 106452491|LOC106452491, 106450636|LOC106450636, 106415050|LOC106415050, 106411335|LOC106411335, 106446718|LOC106446718, 106391858|LOC106391858	0.0926	0.0449275	106354685|LOC106354685, 106400535|LOC106400535, 106346112|LOC106346112, 106400536|LOC106400536, 106366108|LOC106366108, 106352831|LOC106352831, 106452491|LOC106452491, 106450636|LOC106450636, 106415050|LOC106415050, 106446718|LOC106446718, 106391858|LOC106391858	11	106415904|LOC106415904, 106347720|LOC106347720, 106452368|LOC106452368, 106411335|LOC106411335	4	138
GO:0009514	glyoxysome	Cellular Component	106349686|LOC106349686, 106348746|LOC106348746, 106397390|LOC106397390, 106401486|LOC106401486, 106440395|LOC106440395, 106375313|LOC106375313, 106439834|LOC106439834, 106406258|LOC106406258, 106413451|LOC106413451, 106385336|LOC106385336	0.1471	0.00508807	106349686|LOC106349686, 106397390|LOC106397390, 106401486|LOC106401486, 106440395|LOC106440395	4	106348746|LOC106348746, 106375313|LOC106375313, 106439834|LOC106439834, 106406258|LOC106406258, 106413451|LOC106413451, 106385336|LOC106385336	6	52
GO:0009504	cell plate	Cellular Component	106346324|LOC106346324, 106415202|LOC106415202, 106385051|LOC106385051, 106385049|LOC106385049, 106362294|LOC106362294, 106362319|LOC106362319, 106362318|LOC106362318, 106418307|LOC106418307, 106382737|LOC106382737, 106418306|LOC106418306	0.1205	0.0197706	106346324|LOC106346324, 106415202|LOC106415202, 106385051|LOC106385051, 106385049|LOC106385049, 106362294|LOC106362294, 106362319|LOC106362319, 106362318|LOC106362318	7	106418307|LOC106418307, 106382737|LOC106382737, 106418306|LOC106418306	3	68
GO:0009295	nucleoid	Cellular Component	106400535|LOC106400535, 106346112|LOC106346112, 106400536|LOC106400536, 106382144|LOC106382144, 106349089|LOC106349089, 106345298|LOC106345298, 106390921|LOC106390921, 106349229|LOC106349229	0.2759	0.000163164	106400535|LOC106400535, 106346112|LOC106346112, 106400536|LOC106400536, 106382144|LOC106382144, 106349089|LOC106349089, 106345298|LOC106345298, 106390921|LOC106390921, 106349229|LOC106349229	8		0	24
GO:0055028	cortical microtubule	Cellular Component	106348818|LOC106348818, 106387938|LOC106387938, 106402812|LOC106402812, 106402579|LOC106402579, 106407503|LOC106407503, 106402568|LOC106402568, 106447681|LOC106447681	0.2917	0.0002877	106348818|LOC106348818, 106387938|LOC106387938, 106402812|LOC106402812, 106402579|LOC106402579, 106407503|LOC106407503, 106402568|LOC106402568, 106447681|LOC106447681	7		0	17
GO:0000178	exosome (RNase complex)	Cellular Component	106387756|LOC106387756, 106452481|LOC106452481, 106438779|LOC106438779, 106367936|LOC106367936, 106401928|LOC106401928, 106452880|LOC106452880	0.1429	0.0310316	106452481|LOC106452481, 106438779|LOC106438779, 106367936|LOC106367936, 106401928|LOC106401928, 106452880|LOC106452880	5	106387756|LOC106387756	1	30
GO:0000311	plastid large ribosomal subunit	Cellular Component	106381999|LOC106381999, 106400920|LOC106400920, 106415661|LOC106415661, 106418276|LOC106418276, 106391122|LOC106391122	0.5	0.000119855	106381999|LOC106381999, 106400920|LOC106400920, 106415661|LOC106415661, 106418276|LOC106418276, 106391122|LOC106391122	5		0	8
GO:0030877	beta-catenin destruction complex	Cellular Component	106409077|LOC106409077, 106386098|LOC106386098, 106414771|LOC106414771	0.6	0.00170643	106409077|LOC106409077, 106386098|LOC106386098, 106414771|LOC106414771	3		0	5

## Sheet: MT vs ST-30
Supplemental Data 2. GO analysis of DEGs between MS mutant and WT at different DAG.
ST: Time after germination of single-stem plants (WT), MT: Time after germination of multi-stems (MS) mutants.
The significantly enrichened GO terms were selected by p value <0.05.
GO_ID	GO_Term	GO_Category	IDs	Rich.Factor	P.value	S_Up_ID	S_Up_Num	S_Down_ID	S_Down_Num	MapID_Count
GO:0005488	binding	Molecular Function	106400578|LOC106400578, 106365673|LOC106365673, 106400534|LOC106400534, 106451289|LOC106451289, 106346100|LOC106346100, 106453071|LOC106453071, 106453007|LOC106453007, 106447281|LOC106447281, 106447279|LOC106447279, 106387282|LOC106387282, 106453087|LOC106453087, 106361224|LOC106361224, 106387277|LOC106387277, 106366805|LOC106366805, 106349207|LOC106349207, 106402021|LOC106402021, 106438558|LOC10…	0.0472	0.0108837	106400578|LOC106400578, 106365673|LOC106365673, 106400534|LOC106400534, 106451289|LOC106451289, 106346100|LOC106346100, 106453007|LOC106453007, 106447281|LOC106447281, 106447279|LOC106447279, 106387282|LOC106387282, 106361224|LOC106361224, 106387277|LOC106387277, 106438558|LOC106438558, 106371648|LOC106371648, 106446229|LOC106446229, 106399101|LOC106399101, 106451265|LOC106451265, 106368247|LOC10…	35	106453071|LOC106453071, 106453087|LOC106453087, 106366805|LOC106366805, 106349207|LOC106349207, 106402021|LOC106402021, 106366815|LOC106366815, 106398816|LOC106398816, 106349122|LOC106349122, 106375313|LOC106375313, 106450535|LOC106450535, 106447283|LOC106447283, 106452364|LOC106452364, 106371830|LOC106371830, 106366802|LOC106366802, 106451128|LOC106451128, 106416684|LOC106416684, 106447494|LOC10…	62	1718
GO:0009055	electron transfer activity	Molecular Function	106451283|LOC106451283, 106366804|LOC106366804, 106402510|LOC106402510, 106389295|LOC106389295, 106354655|LOC106354655, 106443160|LOC106443160, 106453218|LOC106453218, 106346112|LOC106346112, 106400536|LOC106400536, 106354597|LOC106354597, 106349108|LOC106349108, 106400358|LOC106400358, 106366465|LOC106366465, 106400535|LOC106400535, 106377373|LOC106377373, 106392064|LOC106392064, 106390964|LOC10…	0.0459	0.0441061	106451283|LOC106451283, 106389295|LOC106389295, 106354655|LOC106354655, 106443160|LOC106443160, 106346112|LOC106346112, 106400536|LOC106400536, 106354597|LOC106354597, 106349108|LOC106349108, 106400535|LOC106400535, 106353459|LOC106353459, 106382125|LOC106382125, 106353458|LOC106353458, 106454792|LOC106454792, 106410731|LOC106410731, 106354602|LOC106354602, 106357218|LOC106357218, 106375231|LOC10…	26	106366804|LOC106366804, 106402510|LOC106402510, 106453218|LOC106453218, 106400358|LOC106400358, 106366465|LOC106366465, 106377373|LOC106377373, 106392064|LOC106392064, 106390964|LOC106390964, 106390013|LOC106390013, 106391585|LOC106391585, 106348752|LOC106348752, 106454330|LOC106454330, 106368255|LOC106368255, 106372459|LOC106372459, 106446379|LOC106446379, 106371769|LOC106371769, 106376604|LOC10…	44	1142
GO:0005506	iron ion binding	Molecular Function	106366810|LOC106366810, 106348481|LOC106348481, 106444436|LOC106444436, 106377373|LOC106377373, 106387621|LOC106387621, 106383749|LOC106383749, 106358574|LOC106358574, 106440879|LOC106440879, 106440900|LOC106440900, 106422857|LOC106422857, 106407713|LOC106407713, 106391539|LOC106391539, 106401876|LOC106401876, 106398038|LOC106398038, 106348250|LOC106348250, 106370917|LOC106370917, 106347405|LOC10…	0.0736	0.000704014	106348481|LOC106348481, 106444436|LOC106444436, 106440900|LOC106440900, 106422857|LOC106422857, 106348250|LOC106348250, 106443698|LOC106443698, 106377006|LOC106377006, 106375731|LOC106375731	8	106366810|LOC106366810, 106377373|LOC106377373, 106387621|LOC106387621, 106383749|LOC106383749, 106358574|LOC106358574, 106440879|LOC106440879, 106407713|LOC106407713, 106391539|LOC106391539, 106401876|LOC106401876, 106398038|LOC106398038, 106370917|LOC106370917, 106347405|LOC106347405, 106381296|LOC106381296, 106375948|LOC106375948, 106395329|LOC106395329, 106381238|LOC106381238, 106446190|LOC10…	19	293
GO:0015035	protein-disulfide reductase activity	Molecular Function	106451283|LOC106451283, 106366804|LOC106366804, 106402510|LOC106402510, 106443160|LOC106443160, 106453218|LOC106453218, 106346112|LOC106346112, 106400536|LOC106400536, 106366465|LOC106366465, 106400535|LOC106400535, 106348752|LOC106348752, 106454330|LOC106454330, 106368255|LOC106368255, 106431372|LOC106431372, 106354602|LOC106354602, 106375231|LOC106375231, 106358604|LOC106358604, 106366178|LOC10…	0.071	0.00143997	106451283|LOC106451283, 106443160|LOC106443160, 106346112|LOC106346112, 106400536|LOC106400536, 106400535|LOC106400535, 106354602|LOC106354602, 106375231|LOC106375231, 106366178|LOC106366178, 106454885|LOC106454885, 106361116|LOC106361116, 106454855|LOC106454855, 106409184|LOC106409184	12	106366804|LOC106366804, 106402510|LOC106402510, 106453218|LOC106453218, 106366465|LOC106366465, 106348752|LOC106348752, 106454330|LOC106454330, 106368255|LOC106368255, 106431372|LOC106431372, 106358604|LOC106358604, 106430993|LOC106430993, 106411718|LOC106411718, 106400198|LOC106400198, 106394608|LOC106394608, 106449438|LOC106449438	14	298
GO:0004888	transmembrane signaling receptor activity	Molecular Function	106445304|LOC106445304, 106451428|LOC106451428, 106366484|LOC106366484, 106453648|LOC106453648, 106386568|LOC106386568, 106386565|LOC106386565, 106390230|LOC106390230, 106445298|LOC106445298, 106345955|LOC106345955, 106445300|LOC106445300, 106398395|LOC106398395, 106379418|LOC106379418, 106377793|LOC106377793, 106389404|LOC106389404, 106373294|LOC106373294, 106392345|LOC106392345, 106450776|LOC10…	0.0554	0.0302908	106445304|LOC106445304, 106386568|LOC106386568, 106386565|LOC106386565, 106445298|LOC106445298, 106445300|LOC106445300, 106377793|LOC106377793, 106445295|LOC106445295, 106373937|LOC106373937	8	106451428|LOC106451428, 106366484|LOC106366484, 106453648|LOC106453648, 106390230|LOC106390230, 106345955|LOC106345955, 106398395|LOC106398395, 106379418|LOC106379418, 106389404|LOC106389404, 106373294|LOC106373294, 106392345|LOC106392345, 106450776|LOC106450776, 106410675|LOC106410675, 106385074|LOC106385074, 106346257|LOC106346257, 106402654|LOC106402654, 106439116|LOC106439116, 106361419|LOC10…	18	333
GO:0000156	phosphorelay response regulator activity	Molecular Function	106365665|LOC106365665, 106446234|LOC106446234, 106410863|LOC106410863, 106412097|LOC106412097, 106348478|LOC106348478, 106348254|LOC106348254, 106404304|LOC106404304, 106453100|LOC106453100, 106449149|LOC106449149, 106368027|LOC106368027, 106366007|LOC106366007, 106454524|LOC106454524, 106361968|LOC106361968, 106408933|LOC106408933, 106408666|LOC106408666, 106394289|LOC106394289, 106362751|LOC10…	0.0823	0.00115108	106365665|LOC106365665, 106446234|LOC106446234, 106348478|LOC106348478, 106348254|LOC106348254, 106404304|LOC106404304, 106366007|LOC106366007, 106454524|LOC106454524, 106408666|LOC106408666	8	106410863|LOC106410863, 106412097|LOC106412097, 106453100|LOC106453100, 106449149|LOC106449149, 106368027|LOC106368027, 106361968|LOC106361968, 106408933|LOC106408933, 106394289|LOC106394289, 106362751|LOC106362751, 106362416|LOC106362416, 106401000|LOC106401000	11	168
GO:0004553	hydrolase activity, hydrolyzing O-glycosyl compounds	Molecular Function	106400096|LOC106400096, 106401646|LOC106401646, 106385882|LOC106385882, 106385883|LOC106385883, 106392232|LOC106392232, 106443520|LOC106443520, 106411288|LOC106411288, 106346512|LOC106346512, 106391891|LOC106391891, 106429199|LOC106429199, 106441042|LOC106441042, 106408734|LOC106408734, 106391591|LOC106391591, 106400623|LOC106400623, 106371532|LOC106371532, 106394469|LOC106394469, 106400624|LOC10…	0.1406	1.37812e-06	106401646|LOC106401646, 106385882|LOC106385882, 106385883|LOC106385883, 106443520|LOC106443520, 106408734|LOC106408734	5	106400096|LOC106400096, 106392232|LOC106392232, 106411288|LOC106411288, 106346512|LOC106346512, 106391891|LOC106391891, 106429199|LOC106429199, 106441042|LOC106441042, 106391591|LOC106391591, 106400623|LOC106400623, 106371532|LOC106371532, 106394469|LOC106394469, 106400624|LOC106400624, 106385619|LOC106385619	13	92
GO:0016762	xyloglucan:xyloglucosyl transferase activity	Molecular Function	106401646|LOC106401646, 106385882|LOC106385882, 106385883|LOC106385883, 106392232|LOC106392232, 106443520|LOC106443520, 106411288|LOC106411288, 106346512|LOC106346512, 106391891|LOC106391891, 106429199|LOC106429199, 106441042|LOC106441042, 106391591|LOC106391591, 106400623|LOC106400623, 106371532|LOC106371532, 106394469|LOC106394469, 106400624|LOC106400624, 106385619|LOC106385619	0.1481	2.61097e-06	106401646|LOC106401646, 106385882|LOC106385882, 106385883|LOC106385883, 106443520|LOC106443520	4	106392232|LOC106392232, 106411288|LOC106411288, 106346512|LOC106346512, 106391891|LOC106391891, 106429199|LOC106429199, 106441042|LOC106441042, 106391591|LOC106391591, 106400623|LOC106400623, 106371532|LOC106371532, 106394469|LOC106394469, 106400624|LOC106400624, 106385619|LOC106385619	12	77
GO:0019137	thioglucosidase activity	Molecular Function	106453838|LOC106453838, 106438812|LOC106438812, 106382659|LOC106382659, 106407131|LOC106407131, 106382660|LOC106382660, 106378911|LOC106378911, 106384080|LOC106384080, 106384082|LOC106384082, 106382674|LOC106382674, 106411373|LOC106411373, 106367375|LOC106367375, 106410978|LOC106410978, 106360622|LOC106360622, 106360621|LOC106360621, 106383406|LOC106383406	0.3125	1.21103e-10	106453838|LOC106453838, 106438812|LOC106438812, 106382659|LOC106382659, 106407131|LOC106407131, 106382660|LOC106382660, 106378911|LOC106378911, 106384080|LOC106384080, 106384082|LOC106384082, 106382674|LOC106382674, 106411373|LOC106411373, 106367375|LOC106367375, 106410978|LOC106410978, 106360622|LOC106360622, 106360621|LOC106360621	14	106383406|LOC106383406	1	26
GO:0045543	gibberellin 2-beta-dioxygenase activity	Molecular Function	106444436|LOC106444436, 106422857|LOC106422857, 106401876|LOC106401876, 106398038|LOC106398038, 106370917|LOC106370917, 106347405|LOC106347405, 106375948|LOC106375948, 106361601|LOC106361601	0.2667	1.03257e-05	106444436|LOC106444436, 106422857|LOC106422857	2	106401876|LOC106401876, 106398038|LOC106398038, 106370917|LOC106370917, 106347405|LOC106347405, 106375948|LOC106375948, 106361601|LOC106361601	6	24
GO:0010200	response to chitin	Biological Process	106387754|LOC106387754, 106387240|LOC106387240, 106385519|LOC106385519, 106362336|LOC106362336, 106394550|LOC106394550, 106396334|LOC106396334, 106443450|LOC106443450, 106386248|LOC106386248, 106393921|LOC106393921, 106451376|LOC106451376, 106449379|LOC106449379, 106372476|LOC106372476, 106449056|LOC106449056, 106397907|LOC106397907, 106418352|LOC106418352, 106406981|LOC106406981, 106410903|LOC10…	0.1152	5.52062e-15	106362336|LOC106362336, 106443450|LOC106443450, 106451376|LOC106451376, 106449379|LOC106449379, 106394536|LOC106394536, 106445219|LOC106445219	6	106387754|LOC106387754, 106387240|LOC106387240, 106385519|LOC106385519, 106394550|LOC106394550, 106396334|LOC106396334, 106386248|LOC106386248, 106393921|LOC106393921, 106372476|LOC106372476, 106449056|LOC106449056, 106397907|LOC106397907, 106418352|LOC106418352, 106406981|LOC106406981, 106410903|LOC106410903, 106356256|LOC106356256, 106438387|LOC106438387, 106367757|LOC106367757, 106375769|LOC10…	56	429
GO:0006952	defense response	Biological Process	106452385|LOC106452385, 106354802|LOC106354802, 106450539|LOC106450539, 106451864|LOC106451864, 106407373|LOC106407373, 106362192|LOC106362192, 106446486|LOC106446486, 106399436|LOC106399436, 106406447|LOC106406447, 106396334|LOC106396334, 106443450|LOC106443450, 106359860|LOC106359860, 106381147|LOC106381147, 106390088|LOC106390088, 106401225|LOC106401225, 106376712|LOC106376712, 106381146|LOC10…	0.0483	0.0260464	106452385|LOC106452385, 106354802|LOC106354802, 106451864|LOC106451864, 106406447|LOC106406447, 106443450|LOC106443450, 106359860|LOC106359860, 106451376|LOC106451376, 106449379|LOC106449379, 106368172|LOC106368172, 106422042|LOC106422042, 106368261|LOC106368261, 106359377|LOC106359377, 106376331|LOC106376331, 106394536|LOC106394536, 106346162|LOC106346162, 106432749|LOC106432749, 106380769|LOC10…	18	106450539|LOC106450539, 106407373|LOC106407373, 106362192|LOC106362192, 106446486|LOC106446486, 106399436|LOC106399436, 106396334|LOC106396334, 106381147|LOC106381147, 106390088|LOC106390088, 106401225|LOC106401225, 106376712|LOC106376712, 106381146|LOC106381146, 106446379|LOC106446379, 106372476|LOC106372476, 106353785|LOC106353785, 106368742|LOC106368742, 106375354|LOC106375354, 106447251|LOC10…	42	952
GO:0009873	ethylene-activated signaling pathway	Biological Process	106365665|LOC106365665, 106452069|LOC106452069, 106396334|LOC106396334, 106454869|LOC106454869, 106443450|LOC106443450, 106446234|LOC106446234, 106376295|LOC106376295, 106451376|LOC106451376, 106449379|LOC106449379, 106406198|LOC106406198, 106351539|LOC106351539, 106370649|LOC106370649, 106377761|LOC106377761, 106348528|LOC106348528, 106354158|LOC106354158, 106357029|LOC106357029, 106396784|LOC10…	0.0612	0.000395509	106365665|LOC106365665, 106454869|LOC106454869, 106443450|LOC106443450, 106446234|LOC106446234, 106376295|LOC106376295, 106451376|LOC106451376, 106449379|LOC106449379, 106351539|LOC106351539, 106348528|LOC106348528, 106365899|LOC106365899, 106394536|LOC106394536, 106365898|LOC106365898, 106350005|LOC106350005, 106410357|LOC106410357, 106408666|LOC106408666, 106371023|LOC106371023, 106356387|LOC10…	18	106452069|LOC106452069, 106396334|LOC106396334, 106406198|LOC106406198, 106370649|LOC106370649, 106377761|LOC106377761, 106354158|LOC106354158, 106357029|LOC106357029, 106396784|LOC106396784, 106356256|LOC106356256, 106401656|LOC106401656, 106414003|LOC106414003, 106370203|LOC106370203, 106345219|LOC106345219, 106365047|LOC106365047, 106370243|LOC106370243, 106345377|LOC106345377, 106397199|LOC10…	34	671
GO:0009409	response to cold	Biological Process	106397015|LOC106397015, 106453198|LOC106453198, 106398703|LOC106398703, 106452368|LOC106452368, 106352798|LOC106352798, 106450519|LOC106450519, 106354399|LOC106354399, 106453080|LOC106453080, 106452363|LOC106452363, 106387240|LOC106387240, 106383535|LOC106383535, 106397634|LOC106397634, 106441544|LOC106441544, 106406183|LOC106406183, 106416669|LOC106416669, 106346389|LOC106346389, 106406198|LOC10…	0.0551	0.00370532	106397015|LOC106397015, 106352798|LOC106352798, 106354399|LOC106354399, 106383535|LOC106383535, 106441544|LOC106441544, 106346389|LOC106346389, 106365604|LOC106365604, 106388606|LOC106388606	8	106453198|LOC106453198, 106398703|LOC106398703, 106452368|LOC106452368, 106450519|LOC106450519, 106453080|LOC106453080, 106452363|LOC106452363, 106387240|LOC106387240, 106397634|LOC106397634, 106406183|LOC106406183, 106416669|LOC106416669, 106406198|LOC106406198, 106416410|LOC106416410, 106354484|LOC106354484, 106402810|LOC106402810, 106402685|LOC106402685, 106420564|LOC106420564, 106406981|LOC10…	44	759
GO:0006915	apoptotic process	Biological Process	106445304|LOC106445304, 106399105|LOC106399105, 106386574|LOC106386574, 106364685|LOC106364685, 106451428|LOC106451428, 106354823|LOC106354823, 106445717|LOC106445717, 106366484|LOC106366484, 106453648|LOC106453648, 106386568|LOC106386568, 106386565|LOC106386565, 106390230|LOC106390230, 106445298|LOC106445298, 106451762|LOC106451762, 106380767|LOC106380767, 106345955|LOC106345955, 106445300|LOC10…	0.0533	0.0113023	106445304|LOC106445304, 106399105|LOC106399105, 106354823|LOC106354823, 106386568|LOC106386568, 106386565|LOC106386565, 106445298|LOC106445298, 106451762|LOC106451762, 106380767|LOC106380767, 106445300|LOC106445300, 106366989|LOC106366989, 106377793|LOC106377793, 106346162|LOC106346162, 106445295|LOC106445295, 106380769|LOC106380769, 106373937|LOC106373937	15	106386574|LOC106386574, 106364685|LOC106364685, 106451428|LOC106451428, 106445717|LOC106445717, 106366484|LOC106366484, 106453648|LOC106453648, 106390230|LOC106390230, 106345955|LOC106345955, 106398395|LOC106398395, 106372476|LOC106372476, 106368742|LOC106368742, 106379418|LOC106379418, 106389404|LOC106389404, 106375354|LOC106375354, 106386242|LOC106386242, 106348562|LOC106348562, 106392211|LOC10…	30	641
GO:0050832	defense response to fungus	Biological Process	106379059|LOC106379059, 106410419|LOC106410419, 106415724|LOC106415724, 106351645|LOC106351645, 106407032|LOC106407032, 106347962|LOC106347962, 106411008|LOC106411008, 106371769|LOC106371769, 106385033|LOC106385033, 106371768|LOC106371768, 106410903|LOC106410903, 106356256|LOC106356256, 106437575|LOC106437575, 106411014|LOC106411014, 106360918|LOC106360918, 106439489|LOC106439489, 106360917|LOC10…	0.0686	0.000133801	106379059|LOC106379059, 106410419|LOC106410419, 106415724|LOC106415724, 106411008|LOC106411008, 106385033|LOC106385033, 106360918|LOC106360918, 106360917|LOC106360917, 106380156|LOC106380156, 106445219|LOC106445219, 106416348|LOC106416348, 106388606|LOC106388606, 106438681|LOC106438681	12	106351645|LOC106351645, 106407032|LOC106407032, 106347962|LOC106347962, 106371769|LOC106371769, 106371768|LOC106371768, 106410903|LOC106410903, 106356256|LOC106356256, 106437575|LOC106437575, 106411014|LOC106411014, 106439489|LOC106439489, 106375397|LOC106375397, 106407076|LOC106407076, 106348417|LOC106348417, 106394639|LOC106394639, 106446984|LOC106446984, 106382188|LOC106382188, 106397199|LOC10…	30	431
GO:0009414	response to water deprivation	Biological Process	106354399|LOC106354399, 106416234|LOC106416234, 106354844|LOC106354844, 106385519|LOC106385519, 106362336|LOC106362336, 106451788|LOC106451788, 106440954|LOC106440954, 106415724|LOC106415724, 106454869|LOC106454869, 106441065|LOC106441065, 106398710|LOC106398710, 106406699|LOC106406699, 106392257|LOC106392257, 106410863|LOC106410863, 106406198|LOC106406198, 106441064|LOC106441064, 106354484|LOC10…	0.0511	0.0273881	106354399|LOC106354399, 106362336|LOC106362336, 106451788|LOC106451788, 106415724|LOC106415724, 106454869|LOC106454869, 106398710|LOC106398710, 106406699|LOC106406699, 106391557|LOC106391557, 106407643|LOC106407643, 106403536|LOC106403536	10	106416234|LOC106416234, 106354844|LOC106354844, 106385519|LOC106385519, 106440954|LOC106440954, 106441065|LOC106441065, 106392257|LOC106392257, 106410863|LOC106410863, 106406198|LOC106406198, 106441064|LOC106441064, 106354484|LOC106354484, 106410903|LOC106410903, 106411014|LOC106411014, 106348955|LOC106348955, 106390652|LOC106390652, 106407076|LOC106407076, 106379856|LOC106379856, 106407421|LOC10…	31	665
GO:0009611	response to wounding	Biological Process	106371648|LOC106371648, 106451864|LOC106451864, 106451788|LOC106451788, 106387621|LOC106387621, 106407032|LOC106407032, 106383749|LOC106383749, 106358574|LOC106358574, 106443622|LOC106443622, 106365244|LOC106365244, 106446379|LOC106446379, 106406198|LOC106406198, 106395054|LOC106395054, 106391539|LOC106391539, 106356945|LOC106356945, 106356957|LOC106356957, 106407020|LOC106407020, 106365245|LOC10…	0.069	0.000246665	106371648|LOC106371648, 106451864|LOC106451864, 106451788|LOC106451788, 106395054|LOC106395054, 106407020|LOC106407020, 106407016|LOC106407016, 106358589|LOC106358589	7	106387621|LOC106387621, 106407032|LOC106407032, 106383749|LOC106383749, 106358574|LOC106358574, 106443622|LOC106443622, 106365244|LOC106365244, 106446379|LOC106446379, 106406198|LOC106406198, 106391539|LOC106391539, 106356945|LOC106356945, 106356957|LOC106356957, 106365245|LOC106365245, 106346576|LOC106346576, 106388001|LOC106388001, 106348417|LOC106348417, 106445039|LOC106445039, 106414515|LOC10…	31	429
GO:0009408	response to heat	Biological Process	106402021|LOC106402021, 106354787|LOC106354787, 106354760|LOC106354760, 106401075|LOC106401075, 106377322|LOC106377322, 106451510|LOC106451510, 106371994|LOC106371994, 106347195|LOC106347195, 106353095|LOC106353095, 106348721|LOC106348721, 106351956|LOC106351956, 106429199|LOC106429199, 106451511|LOC106451511, 106451531|LOC106451531, 106360182|LOC106360182, 106387209|LOC106387209, 106377006|LOC10…	0.0683	0.00102326	106354787|LOC106354787, 106354760|LOC106354760, 106401075|LOC106401075, 106377006|LOC106377006	4	106402021|LOC106402021, 106377322|LOC106377322, 106451510|LOC106451510, 106371994|LOC106371994, 106347195|LOC106347195, 106353095|LOC106353095, 106348721|LOC106348721, 106351956|LOC106351956, 106429199|LOC106429199, 106451511|LOC106451511, 106451531|LOC106451531, 106360182|LOC106360182, 106387209|LOC106387209, 106385592|LOC106385592, 106443219|LOC106443219, 106385138|LOC106385138, 106400623|LOC10…	27	361
GO:0045454	cell redox homeostasis	Biological Process	106451283|LOC106451283, 106366804|LOC106366804, 106402510|LOC106402510, 106443160|LOC106443160, 106453218|LOC106453218, 106452089|LOC106452089, 106346112|LOC106346112, 106400536|LOC106400536, 106366465|LOC106366465, 106400535|LOC106400535, 106348752|LOC106348752, 106454330|LOC106454330, 106356040|LOC106356040, 106355063|LOC106355063, 106364986|LOC106364986, 106368255|LOC106368255, 106431372|LOC10…	0.0586	0.0107188	106451283|LOC106451283, 106443160|LOC106443160, 106346112|LOC106346112, 106400536|LOC106400536, 106400535|LOC106400535, 106356040|LOC106356040, 106355063|LOC106355063, 106354602|LOC106354602, 106375231|LOC106375231, 106366178|LOC106366178, 106454885|LOC106454885, 106361116|LOC106361116, 106454855|LOC106454855, 106409184|LOC106409184	14	106366804|LOC106366804, 106402510|LOC106402510, 106453218|LOC106453218, 106452089|LOC106452089, 106366465|LOC106366465, 106348752|LOC106348752, 106454330|LOC106454330, 106364986|LOC106364986, 106368255|LOC106368255, 106431372|LOC106431372, 106358604|LOC106358604, 106430993|LOC106430993, 106411718|LOC106411718, 106400198|LOC106400198, 106394608|LOC106394608, 106449438|LOC106449438	16	413
GO:0009753	response to jasmonic acid	Biological Process	106453048|LOC106453048, 106452069|LOC106452069, 106385519|LOC106385519, 106446486|LOC106446486, 106451788|LOC106451788, 106387621|LOC106387621, 106454869|LOC106454869, 106383749|LOC106383749, 106381147|LOC106381147, 106358574|LOC106358574, 106381146|LOC106381146, 106446379|LOC106446379, 106353785|LOC106353785, 106391539|LOC106391539, 106346902|LOC106346902, 106366650|LOC106366650, 106407016|LOC10…	0.0574	0.0186725	106453048|LOC106453048, 106451788|LOC106451788, 106454869|LOC106454869, 106407016|LOC106407016, 106356387|LOC106356387	5	106452069|LOC106452069, 106385519|LOC106385519, 106446486|LOC106446486, 106387621|LOC106387621, 106383749|LOC106383749, 106381147|LOC106381147, 106358574|LOC106358574, 106381146|LOC106381146, 106446379|LOC106446379, 106353785|LOC106353785, 106391539|LOC106391539, 106346902|LOC106346902, 106366650|LOC106366650, 106390652|LOC106390652, 106346576|LOC106346576, 106375281|LOC106375281, 106414515|LOC10…	22	380
GO:0045087	innate immune response	Biological Process	106398703|LOC106398703, 106445304|LOC106445304, 106366484|LOC106366484, 106386568|LOC106386568, 106386565|LOC106386565, 106390230|LOC106390230, 106445298|LOC106445298, 106445300|LOC106445300, 106398395|LOC106398395, 106379418|LOC106379418, 106377793|LOC106377793, 106389404|LOC106389404, 106373294|LOC106373294, 106392345|LOC106392345, 106351956|LOC106351956, 106398518|LOC106398518, 106450776|LOC10…	0.0574	0.0208834	106445304|LOC106445304, 106386568|LOC106386568, 106386565|LOC106386565, 106445298|LOC106445298, 106445300|LOC106445300, 106377793|LOC106377793, 106445295|LOC106445295	7	106398703|LOC106398703, 106366484|LOC106366484, 106390230|LOC106390230, 106398395|LOC106398395, 106379418|LOC106379418, 106389404|LOC106389404, 106373294|LOC106373294, 106392345|LOC106392345, 106351956|LOC106351956, 106398518|LOC106398518, 106450776|LOC106450776, 106385074|LOC106385074, 106346257|LOC106346257, 106439116|LOC106439116, 106361419|LOC106361419, 106379944|LOC106379944, 106376492|LOC10…	19	329
GO:0042542	response to hydrogen peroxide	Biological Process	106405367|LOC106405367, 106387240|LOC106387240, 106377322|LOC106377322, 106451510|LOC106451510, 106415540|LOC106415540, 106353095|LOC106353095, 106406981|LOC106406981, 106394635|LOC106394635, 106438387|LOC106438387, 106351956|LOC106351956, 106353511|LOC106353511, 106397539|LOC106397539, 106451511|LOC106451511, 106438385|LOC106438385, 106451531|LOC106451531, 106387209|LOC106387209, 106443219|LOC10…	0.1517	2.40916e-08	106394635|LOC106394635	1	106405367|LOC106405367, 106387240|LOC106387240, 106377322|LOC106377322, 106451510|LOC106451510, 106415540|LOC106415540, 106353095|LOC106353095, 106406981|LOC106406981, 106438387|LOC106438387, 106351956|LOC106351956, 106353511|LOC106353511, 106397539|LOC106397539, 106451511|LOC106451511, 106438385|LOC106438385, 106451531|LOC106451531, 106387209|LOC106387209, 106443219|LOC106443219, 106345570|LOC10…	21	123
GO:0009834	plant-type secondary cell wall biogenesis	Biological Process	106371939|LOC106371939, 106402805|LOC106402805, 106354414|LOC106354414, 106410419|LOC106410419, 106415724|LOC106415724, 106386336|LOC106386336, 106386901|LOC106386901, 106446720|LOC106446720, 106414688|LOC106414688, 106451064|LOC106451064, 106367171|LOC106367171, 106451063|LOC106451063, 106411008|LOC106411008, 106428797|LOC106428797, 106395723|LOC106395723, 106385559|LOC106385559, 106360583|LOC10…	0.2234	3.15613e-11	106402805|LOC106402805, 106354414|LOC106354414, 106410419|LOC106410419, 106415724|LOC106415724, 106386336|LOC106386336, 106386901|LOC106386901, 106446720|LOC106446720, 106414688|LOC106414688, 106451064|LOC106451064, 106367171|LOC106367171, 106451063|LOC106451063, 106411008|LOC106411008, 106428797|LOC106428797, 106395723|LOC106395723, 106385559|LOC106385559, 106360583|LOC106360583, 106358025|LOC10…	20	106371939|LOC106371939	1	72
GO:0009644	response to high light intensity	Biological Process	106451821|LOC106451821, 106387621|LOC106387621, 106377322|LOC106377322, 106407032|LOC106407032, 106383749|LOC106383749, 106451510|LOC106451510, 106358574|LOC106358574, 106391539|LOC106391539, 106353095|LOC106353095, 106451820|LOC106451820, 106438387|LOC106438387, 106397539|LOC106397539, 106451511|LOC106451511, 106438385|LOC106438385, 106451531|LOC106451531, 106387209|LOC106387209, 106443219|LOC10…	0.1146	2.49883e-05		0	106451821|LOC106451821, 106387621|LOC106387621, 106377322|LOC106377322, 106407032|LOC106407032, 106383749|LOC106383749, 106451510|LOC106451510, 106358574|LOC106358574, 106391539|LOC106391539, 106353095|LOC106353095, 106451820|LOC106451820, 106438387|LOC106438387, 106397539|LOC106397539, 106451511|LOC106451511, 106438385|LOC106438385, 106451531|LOC106451531, 106387209|LOC106387209, 106443219|LOC10…	18	130
GO:0010193	response to ozone	Biological Process	106445304|LOC106445304, 106386568|LOC106386568, 106386565|LOC106386565, 106390230|LOC106390230, 106445298|LOC106445298, 106445300|LOC106445300, 106398395|LOC106398395, 106379418|LOC106379418, 106389404|LOC106389404, 106392345|LOC106392345, 106450776|LOC106450776, 106385074|LOC106385074, 106381296|LOC106381296, 106439116|LOC106439116, 106361419|LOC106361419, 106446190|LOC106446190, 106445295|LOC10…	0.0674	0.0118952	106445304|LOC106445304, 106386568|LOC106386568, 106386565|LOC106386565, 106445298|LOC106445298, 106445300|LOC106445300, 106445295|LOC106445295	6	106390230|LOC106390230, 106398395|LOC106398395, 106379418|LOC106379418, 106389404|LOC106389404, 106392345|LOC106392345, 106450776|LOC106450776, 106385074|LOC106385074, 106381296|LOC106381296, 106439116|LOC106439116, 106361419|LOC106361419, 106446190|LOC106446190, 106407111|LOC106407111	12	207
GO:0009809	lignin biosynthetic process	Biological Process	106402805|LOC106402805, 106381125|LOC106381125, 106414688|LOC106414688, 106451064|LOC106451064, 106451063|LOC106451063, 106381124|LOC106381124, 106395723|LOC106395723, 106373897|LOC106373897, 106353515|LOC106353515, 106383908|LOC106383908, 106383910|LOC106383910, 106451620|LOC106451620, 106364571|LOC106364571, 106448639|LOC106448639, 106383909|LOC106383909, 106454902|LOC106454902	0.0755	0.00622345	106402805|LOC106402805, 106414688|LOC106414688, 106451064|LOC106451064, 106451063|LOC106451063, 106395723|LOC106395723, 106353515|LOC106353515, 106383908|LOC106383908, 106383910|LOC106383910, 106451620|LOC106451620, 106364571|LOC106364571, 106448639|LOC106448639, 106383909|LOC106383909, 106454902|LOC106454902	13	106381125|LOC106381125, 106381124|LOC106381124, 106373897|LOC106373897	3	166
GO:0009736	cytokinin-activated signaling pathway	Biological Process	106412097|LOC106412097, 106406198|LOC106406198, 106453100|LOC106453100, 106449149|LOC106449149, 106368027|LOC106368027, 106414003|LOC106414003, 106454524|LOC106454524, 106361968|LOC106361968, 106408933|LOC106408933, 106370243|LOC106370243, 106408666|LOC106408666, 106394289|LOC106394289, 106362751|LOC106362751, 106362416|LOC106362416, 106401000|LOC106401000, 106351471|LOC106351471	0.0599	0.0435158	106454524|LOC106454524, 106408666|LOC106408666	2	106412097|LOC106412097, 106406198|LOC106406198, 106453100|LOC106453100, 106449149|LOC106449149, 106368027|LOC106368027, 106414003|LOC106414003, 106361968|LOC106361968, 106408933|LOC106408933, 106370243|LOC106370243, 106394289|LOC106394289, 106362751|LOC106362751, 106362416|LOC106362416, 106401000|LOC106401000, 106351471|LOC106351471	14	202
GO:0010114	response to red light	Biological Process	106452462|LOC106452462, 106348478|LOC106348478, 106348254|LOC106348254, 106439437|LOC106439437, 106404304|LOC106404304, 106453100|LOC106453100, 106366007|LOC106366007, 106383518|LOC106383518, 106390231|LOC106390231, 106408933|LOC106408933, 106375948|LOC106375948, 106362751|LOC106362751, 106362416|LOC106362416, 106361601|LOC106361601	0.0946	0.00133845	106348478|LOC106348478, 106348254|LOC106348254, 106439437|LOC106439437, 106404304|LOC106404304, 106366007|LOC106366007	5	106452462|LOC106452462, 106453100|LOC106453100, 106383518|LOC106383518, 106390231|LOC106390231, 106408933|LOC106408933, 106375948|LOC106375948, 106362751|LOC106362751, 106362416|LOC106362416, 106361601|LOC106361601	9	122
GO:0006662	glycerol ether metabolic process	Biological Process	106451283|LOC106451283, 106366804|LOC106366804, 106443160|LOC106443160, 106453218|LOC106453218, 106346112|LOC106346112, 106400536|LOC106400536, 106400535|LOC106400535, 106348752|LOC106348752, 106454330|LOC106454330, 106368255|LOC106368255, 106354602|LOC106354602, 106454855|LOC106454855	0.0723	0.0221479	106451283|LOC106451283, 106443160|LOC106443160, 106346112|LOC106346112, 106400536|LOC106400536, 106400535|LOC106400535, 106354602|LOC106354602, 106454855|LOC106454855	7	106366804|LOC106366804, 106453218|LOC106453218, 106348752|LOC106348752, 106454330|LOC106454330, 106368255|LOC106368255	5	136
GO:0042128	nitrate assimilation	Biological Process	106354597|LOC106354597, 106400358|LOC106400358, 106446818|LOC106446818, 106410460|LOC106410460, 106411852|LOC106411852, 106369914|LOC106369914, 106372001|LOC106372001, 106372226|LOC106372226, 106397776|LOC106397776, 106440172|LOC106440172, 106445601|LOC106445601, 106376952|LOC106376952	0.0642	0.0483842	106354597|LOC106354597, 106369914|LOC106369914, 106372001|LOC106372001, 106372226|LOC106372226	4	106400358|LOC106400358, 106446818|LOC106446818, 106410460|LOC106410460, 106411852|LOC106411852, 106397776|LOC106397776, 106440172|LOC106440172, 106445601|LOC106445601, 106376952|LOC106376952	8	146
GO:0006073	cellular glucan metabolic process	Biological Process	106401646|LOC106401646, 106385882|LOC106385882, 106385883|LOC106385883, 106443520|LOC106443520, 106346512|LOC106346512, 106391891|LOC106391891, 106429199|LOC106429199, 106391591|LOC106391591, 106400623|LOC106400623, 106371532|LOC106371532, 106400624|LOC106400624	0.1209	0.000576402	106401646|LOC106401646, 106385882|LOC106385882, 106385883|LOC106385883, 106443520|LOC106443520	4	106346512|LOC106346512, 106391891|LOC106391891, 106429199|LOC106429199, 106391591|LOC106391591, 106400623|LOC106400623, 106371532|LOC106371532, 106400624|LOC106400624	7	67
GO:0010224	response to UV-B	Biological Process	106453031|LOC106453031, 106354445|LOC106354445, 106446517|LOC106446517, 106383518|LOC106383518, 106449286|LOC106449286, 106451620|LOC106451620, 106385592|LOC106385592, 106385138|LOC106385138, 106345570|LOC106345570, 106386850|LOC106386850, 106416646|LOC106416646	0.1146	0.000907256	106453031|LOC106453031, 106451620|LOC106451620	2	106354445|LOC106354445, 106446517|LOC106446517, 106383518|LOC106383518, 106449286|LOC106449286, 106385592|LOC106385592, 106385138|LOC106385138, 106345570|LOC106345570, 106386850|LOC106386850, 106416646|LOC106416646	9	80
GO:0009631	cold acclimation	Biological Process	106444819|LOC106444819, 106406010|LOC106406010, 106416234|LOC106416234, 106392257|LOC106392257, 106388078|LOC106388078, 106411014|LOC106411014, 106366343|LOC106366343, 106385592|LOC106385592, 106385138|LOC106385138, 106386850|LOC106386850, 106416646|LOC106416646	0.0909	0.00567456	106388078|LOC106388078	1	106444819|LOC106444819, 106406010|LOC106406010, 106416234|LOC106416234, 106392257|LOC106392257, 106411014|LOC106411014, 106366343|LOC106366343, 106385592|LOC106385592, 106385138|LOC106385138, 106386850|LOC106386850, 106416646|LOC106416646	10	110
GO:0042538	hyperosmotic salinity response	Biological Process	106397015|LOC106397015, 106354399|LOC106354399, 106450539|LOC106450539, 106348955|LOC106348955, 106407016|LOC106407016, 106391557|LOC106391557, 106346576|LOC106346576, 106385592|LOC106385592, 106385138|LOC106385138, 106386850|LOC106386850, 106416646|LOC106416646	0.0827	0.0112432	106397015|LOC106397015, 106354399|LOC106354399, 106407016|LOC106407016, 106391557|LOC106391557	4	106450539|LOC106450539, 106348955|LOC106348955, 106346576|LOC106346576, 106385592|LOC106385592, 106385138|LOC106385138, 106386850|LOC106386850, 106416646|LOC106416646	7	108
GO:0048046	apoplast	Cellular Component	106452368|LOC106452368, 106453029|LOC106453029, 106451049|LOC106451049, 106372673|LOC106372673, 106372522|LOC106372522, 106354526|LOC106354526, 106386759|LOC106386759, 106452363|LOC106452363, 106442523|LOC106442523, 106402805|LOC106402805, 106410361|LOC106410361, 106348871|LOC106348871, 106356004|LOC106356004, 106381130|LOC106381130, 106441311|LOC106441311, 106439741|LOC106439741, 106366310|LOC10…	0.0546	0.00115392	106453029|LOC106453029, 106354526|LOC106354526, 106402805|LOC106402805, 106356004|LOC106356004, 106439741|LOC106439741, 106441544|LOC106441544, 106345514|LOC106345514, 106451769|LOC106451769, 106401646|LOC106401646, 106406699|LOC106406699, 106385882|LOC106385882, 106385883|LOC106385883, 106451064|LOC106451064, 106444570|LOC106444570, 106451063|LOC106451063, 106385033|LOC106385033, 106443520|LOC10…	21	106452368|LOC106452368, 106451049|LOC106451049, 106372673|LOC106372673, 106372522|LOC106372522, 106386759|LOC106386759, 106452363|LOC106452363, 106442523|LOC106442523, 106410361|LOC106410361, 106348871|LOC106348871, 106381130|LOC106381130, 106441311|LOC106441311, 106366310|LOC106366310, 106400096|LOC106400096, 106446818|LOC106446818, 106351645|LOC106351645, 106452301|LOC106452301, 106446093|LOC10…	48	960
GO:0031224	intrinsic component of membrane	Cellular Component	106445304|LOC106445304, 106451428|LOC106451428, 106366484|LOC106366484, 106453648|LOC106453648, 106386568|LOC106386568, 106386565|LOC106386565, 106390230|LOC106390230, 106445298|LOC106445298, 106345955|LOC106345955, 106445300|LOC106445300, 106398395|LOC106398395, 106379418|LOC106379418, 106377793|LOC106377793, 106389404|LOC106389404, 106373294|LOC106373294, 106392345|LOC106392345, 106450776|LOC10…	0.0577	0.0217136	106445304|LOC106445304, 106386568|LOC106386568, 106386565|LOC106386565, 106445298|LOC106445298, 106445300|LOC106445300, 106377793|LOC106377793, 106445295|LOC106445295, 106373937|LOC106373937	8	106451428|LOC106451428, 106366484|LOC106366484, 106453648|LOC106453648, 106390230|LOC106390230, 106345955|LOC106345955, 106398395|LOC106398395, 106379418|LOC106379418, 106389404|LOC106389404, 106373294|LOC106373294, 106392345|LOC106392345, 106450776|LOC106450776, 106410675|LOC106410675, 106385074|LOC106385074, 106346257|LOC106346257, 106439116|LOC106439116, 106361419|LOC106361419, 106379944|LOC10…	17	306
GO:0000151	ubiquitin ligase complex	Cellular Component	106384828|LOC106384828, 106390073|LOC106390073, 106350340|LOC106350340, 106368214|LOC106368214, 106361163|LOC106361163, 106386914|LOC106386914, 106375769|LOC106375769, 106407421|LOC106407421, 106375766|LOC106375766, 106446341|LOC106446341, 106355688|LOC106355688, 106402418|LOC106402418, 106386570|LOC106386570, 106441237|LOC106441237, 106374666|LOC106374666, 106450052|LOC106450052, 106440054|LOC10…	0.0588	0.0222259	106355688|LOC106355688, 106386570|LOC106386570	2	106384828|LOC106384828, 106390073|LOC106390073, 106350340|LOC106350340, 106368214|LOC106368214, 106361163|LOC106361163, 106386914|LOC106386914, 106375769|LOC106375769, 106407421|LOC106407421, 106375766|LOC106375766, 106446341|LOC106446341, 106402418|LOC106402418, 106441237|LOC106441237, 106374666|LOC106374666, 106450052|LOC106450052, 106440054|LOC106440054, 106346667|LOC106346667, 106447354|LOC10…	21	314
GO:0009579	thylakoid	Cellular Component	106452368|LOC106452368, 106354685|LOC106354685, 106451049|LOC106451049, 106356008|LOC106356008, 106346112|LOC106346112, 106452363|LOC106452363, 106452240|LOC106452240, 106400536|LOC106400536, 106400535|LOC106400535, 106348752|LOC106348752, 106454330|LOC106454330	0.0679	0.040862	106354685|LOC106354685, 106346112|LOC106346112, 106400536|LOC106400536, 106400535|LOC106400535	4	106452368|LOC106452368, 106451049|LOC106451049, 106356008|LOC106356008, 106452363|LOC106452363, 106452240|LOC106452240, 106348752|LOC106348752, 106454330|LOC106454330	7	138
GO:0009295	nucleoid	Cellular Component	106346112|LOC106346112, 106400536|LOC106400536, 106400535|LOC106400535, 106345298|LOC106345298, 106348752|LOC106348752, 106454330|LOC106454330, 106380191|LOC106380191	0.2414	7.50272e-05	106346112|LOC106346112, 106400536|LOC106400536, 106400535|LOC106400535, 106345298|LOC106345298	4	106348752|LOC106348752, 106454330|LOC106454330, 106380191|LOC106380191	3	24
GO:0009536	plastid	Cellular Component	106416669|LOC106416669, 106402685|LOC106402685, 106406721|LOC106406721, 106348417|LOC106348417, 106446984|LOC106446984, 106368828|LOC106368828	0.1333	0.00624874		0	106416669|LOC106416669, 106402685|LOC106402685, 106406721|LOC106406721, 106348417|LOC106348417, 106446984|LOC106446984, 106368828|LOC106368828	6	35
GO:0005811	lipid droplet	Cellular Component	106354076|LOC106354076, 106354075|LOC106354075, 106406314|LOC106406314, 106405565|LOC106405565	0.1081	0.0479634		0	106354076|LOC106354076, 106354075|LOC106354075, 106406314|LOC106406314, 106405565|LOC106405565	4	36
GO:0000506	glycosylphosphatidylinositol-N-acetylglucosaminyltransferase (GPI-GnT) complex	Cellular Component	106370718|LOC106370718, 106372585|LOC106372585	0.5	0.00792676	106372585|LOC106372585	1	106370718|LOC106370718	1	2
GO:0030017	sarcomere	Cellular Component	106433437|LOC106433437, 106408069|LOC106408069	0.2857	0.0257468	106433437|LOC106433437, 106408069|LOC106408069	2		0	5
GO:0072372	cilium	Cellular Component	106387291|LOC106387291, 106412323|LOC106412323	0.25	0.0334904	106387291|LOC106387291	1	106412323|LOC106412323	1	8
GO:0001726	ruffle	Cellular Component	106371986|LOC106371986, 106371955|LOC106371955	0.2222	0.0420105		0	106371986|LOC106371986, 106371955|LOC106371955	2	9
GO:0071942	XPC complex	Cellular Component	106354445|LOC106354445	1	0.0372806		0	106354445|LOC106354445	1	1
GO:0001917	photoreceptor inner segment	Cellular Component	106413464|LOC106413464	1	0.0372806		0	106413464|LOC106413464	1	1
GO:0001651	dense fibrillar component	Cellular Component	106360694|LOC106360694	1	0.0372806		0	106360694|LOC106360694	1	1
GO:0005671	obsolete Ada2/Gcn5/Ada3 transcription activator complex	Cellular Component	106449436|LOC106449436	1	0.0372806		0	106449436|LOC106449436	1	1

## Sheet: MT vs ST-35
Supplemental Data 2. GO analysis of DEGs between MS mutant and WT at different DAG.
ST: Time after germination of single-stem plants (WT), MT: Time after germination of multi-stems (MS) mutants.
The significantly enrichened GO terms were selected by p value <0.05.
GO_ID	GO_Term	GO_Category	IDs	Rich.Factor	P.value	S_Up_ID	S_Up_Num	S_Down_ID	S_Down_Num	MapID_Count
GO:0003700	DNA-binding transcription factor activity	Molecular Function	106367018|LOC106367018, 106454869|LOC106454869, 106381425|LOC106381425, 106372487|LOC106372487, 106444576|LOC106444576, 106397513|LOC106397513, 106416580|LOC106416580, 106349404|LOC106349404, 106381656|LOC106381656, 106397757|LOC106397757, 106346114|LOC106346114, 106400711|LOC106400711, 106443958|LOC106443958, 106400794|LOC106400794, 106439447|LOC106439447, 106427905|LOC106427905, 106364268|LOC10…	0.0796	1.5233e-06	106454869|LOC106454869, 106381425|LOC106381425, 106444576|LOC106444576, 106397513|LOC106397513, 106416580|LOC106416580, 106349404|LOC106349404, 106381656|LOC106381656, 106397757|LOC106397757, 106346114|LOC106346114, 106400711|LOC106400711, 106443958|LOC106443958, 106400794|LOC106400794, 106439447|LOC106439447, 106427905|LOC106427905, 106364268|LOC106364268, 106364269|LOC106364269, 106398204|LOC10…	212	106367018|LOC106367018, 106372487|LOC106372487, 106450539|LOC106450539, 106369983|LOC106369983, 106452069|LOC106452069, 106381874|LOC106381874, 106451875|LOC106451875, 106382495|LOC106382495, 106453090|LOC106453090, 106364157|LOC106364157, 106382847|LOC106382847, 106364156|LOC106364156, 106366094|LOC106366094, 106357126|LOC106357126, 106396525|LOC106396525, 106404904|LOC106404904, 106372376|LOC10…	50	2564
GO:0005509	calcium ion binding	Molecular Function	106354666|LOC106354666, 106372374|LOC106372374, 106366369|LOC106366369, 106443550|LOC106443550, 106352444|LOC106352444, 106354802|LOC106354802, 106399811|LOC106399811, 106368206|LOC106368206, 106371121|LOC106371121, 106418167|LOC106418167, 106367016|LOC106367016, 106371347|LOC106371347, 106408965|LOC106408965, 106376492|LOC106376492, 106358399|LOC106358399, 106449566|LOC106449566, 106407133|LOC10…	0.0994	2.08667e-06	106354666|LOC106354666, 106443550|LOC106443550, 106352444|LOC106352444, 106354802|LOC106354802, 106399811|LOC106399811, 106368206|LOC106368206, 106371121|LOC106371121, 106371347|LOC106371347, 106408965|LOC106408965, 106376492|LOC106376492, 106358399|LOC106358399, 106449566|LOC106449566, 106407133|LOC106407133, 106406419|LOC106406419, 106358202|LOC106358202, 106390730|LOC106390730, 106385606|LOC10…	73	106372374|LOC106372374, 106366369|LOC106366369, 106418167|LOC106418167, 106367016|LOC106367016, 106347544|LOC106347544, 106381573|LOC106381573, 106381824|LOC106381824, 106395329|LOC106395329, 106388197|LOC106388197, 106365689|LOC106365689, 106381394|LOC106381394, 106416986|LOC106416986, 106381879|LOC106381879, 106398660|LOC106398660, 106410218|LOC106410218, 106345333|LOC106345333, 106380868|LOC10…	17	699
GO:0016491	oxidoreductase activity	Molecular Function	106398694|LOC106398694, 106447281|LOC106447281, 106452409|LOC106452409, 106360289|LOC106360289, 106447279|LOC106447279, 106417584|LOC106417584, 106449214|LOC106449214, 106440900|LOC106440900, 106418116|LOC106418116, 106450535|LOC106450535, 106388005|LOC106388005, 106358357|LOC106358357, 106445302|LOC106445302, 106377123|LOC106377123, 106358356|LOC106358356, 106402344|LOC106402344, 106447907|LOC10…	0.0842	0.0199117	106447281|LOC106447281, 106360289|LOC106360289, 106447279|LOC106447279, 106449214|LOC106449214, 106440900|LOC106440900, 106358357|LOC106358357, 106445302|LOC106445302, 106377123|LOC106377123, 106358356|LOC106358356, 106402344|LOC106402344, 106447907|LOC106447907, 106366296|LOC106366296, 106345679|LOC106345679, 106441959|LOC106441959, 106353521|LOC106353521, 106368664|LOC106368664, 106375731|LOC10…	30	106398694|LOC106398694, 106452409|LOC106452409, 106417584|LOC106417584, 106418116|LOC106418116, 106450535|LOC106450535, 106388005|LOC106388005, 106381824|LOC106381824, 106382254|LOC106382254, 106385479|LOC106385479, 106395025|LOC106395025	10	370
GO:0004553	hydrolase activity, hydrolyzing O-glycosyl compounds	Molecular Function	106392146|LOC106392146, 106394469|LOC106394469, 106371532|LOC106371532, 106348099|LOC106348099, 106348185|LOC106348185, 106410734|LOC106410734, 106400624|LOC106400624, 106400623|LOC106400623, 106392232|LOC106392232, 106410736|LOC106410736, 106441042|LOC106441042, 106411288|LOC106411288, 106429199|LOC106429199, 106385619|LOC106385619, 106392059|LOC106392059, 106390181|LOC106390181, 106391891|LOC10…	0.1719	7.49781e-06	106392146|LOC106392146, 106394469|LOC106394469, 106371532|LOC106371532, 106410734|LOC106410734, 106400624|LOC106400624, 106400623|LOC106400623, 106392232|LOC106392232, 106410736|LOC106410736, 106441042|LOC106441042, 106411288|LOC106411288, 106429199|LOC106429199, 106385619|LOC106385619, 106392059|LOC106392059, 106390181|LOC106390181, 106391891|LOC106391891, 106391591|LOC106391591, 106442795|LOC10…	20	106348099|LOC106348099, 106348185|LOC106348185	2	92
GO:0016762	xyloglucan:xyloglucosyl transferase activity	Molecular Function	106392146|LOC106392146, 106394469|LOC106394469, 106371532|LOC106371532, 106348099|LOC106348099, 106348185|LOC106348185, 106410734|LOC106410734, 106400624|LOC106400624, 106400623|LOC106400623, 106392232|LOC106392232, 106410736|LOC106410736, 106441042|LOC106441042, 106411288|LOC106411288, 106429199|LOC106429199, 106385619|LOC106385619, 106392059|LOC106392059, 106390181|LOC106390181, 106391891|LOC10…	0.1944	1.5734e-06	106392146|LOC106392146, 106394469|LOC106394469, 106371532|LOC106371532, 106410734|LOC106410734, 106400624|LOC106400624, 106400623|LOC106400623, 106392232|LOC106392232, 106410736|LOC106410736, 106441042|LOC106441042, 106411288|LOC106411288, 106429199|LOC106429199, 106385619|LOC106385619, 106392059|LOC106392059, 106390181|LOC106390181, 106391891|LOC106391891, 106391591|LOC106391591, 106442795|LOC10…	19	106348099|LOC106348099, 106348185|LOC106348185	2	77
GO:0050662	obsolete coenzyme binding	Molecular Function	106349686|LOC106349686, 106401486|LOC106401486, 106346097|LOC106346097, 106389885|LOC106389885, 106348746|LOC106348746, 106375449|LOC106375449, 106392805|LOC106392805, 106396732|LOC106396732, 106365561|LOC106365561, 106445572|LOC106445572, 106390965|LOC106390965, 106450899|LOC106450899, 106346735|LOC106346735, 106354551|LOC106354551, 106451608|LOC106451608, 106410748|LOC106410748, 106416511|LOC10…	0.1092	0.00855893	106349686|LOC106349686, 106401486|LOC106401486, 106389885|LOC106389885, 106375449|LOC106375449, 106392805|LOC106392805, 106396732|LOC106396732, 106365561|LOC106365561, 106445572|LOC106445572, 106450899|LOC106450899, 106346735|LOC106346735, 106410748|LOC106410748, 106441211|LOC106441211, 106407573|LOC106407573	13	106346097|LOC106346097, 106348746|LOC106348746, 106390965|LOC106390965, 106354551|LOC106354551, 106451608|LOC106451608, 106416511|LOC106416511	6	151
GO:0030246	carbohydrate binding	Molecular Function	106441435|LOC106441435, 106382536|LOC106382536, 106442523|LOC106442523, 106346522|LOC106346522, 106346521|LOC106346521, 106452556|LOC106452556, 106444667|LOC106444667, 106418003|LOC106418003, 106402470|LOC106402470, 106402113|LOC106402113, 106405609|LOC106405609, 106403520|LOC106403520, 106443147|LOC106443147, 106355929|LOC106355929	0.1111	0.0190528	106346522|LOC106346522, 106346521|LOC106346521, 106444667|LOC106444667, 106402113|LOC106402113, 106443147|LOC106443147	5	106441435|LOC106441435, 106382536|LOC106382536, 106442523|LOC106442523, 106452556|LOC106452556, 106418003|LOC106418003, 106402470|LOC106402470, 106405609|LOC106405609, 106403520|LOC106403520, 106355929|LOC106355929	9	104
GO:0005345	purine nucleobase transmembrane transporter activity	Molecular Function	106346935|LOC106346935, 106415275|LOC106415275, 106440761|LOC106440761, 106360685|LOC106360685, 106346936|LOC106346936, 106400905|LOC106400905, 106346238|LOC106346238, 106415558|LOC106415558, 106384565|LOC106384565, 106350821|LOC106350821, 106376644|LOC106376644, 106391879|LOC106391879	0.1667	0.00112447	106346935|LOC106346935, 106415275|LOC106415275, 106440761|LOC106440761, 106360685|LOC106360685, 106346936|LOC106346936, 106400905|LOC106400905, 106346238|LOC106346238, 106415558|LOC106415558, 106384565|LOC106384565, 106376644|LOC106376644, 106391879|LOC106391879	11	106350821|LOC106350821	1	54
GO:0004806	triglyceride lipase activity	Molecular Function	106393587|LOC106393587, 106374317|LOC106374317, 106372515|LOC106372515, 106394391|LOC106394391, 106367278|LOC106367278, 106428475|LOC106428475, 106409269|LOC106409269, 106439511|LOC106439511, 106409187|LOC106409187, 106442268|LOC106442268, 106404349|LOC106404349	0.1058	0.0474362	106374317|LOC106374317, 106372515|LOC106372515, 106394391|LOC106394391, 106367278|LOC106367278, 106409269|LOC106409269, 106409187|LOC106409187	6	106393587|LOC106393587, 106428475|LOC106428475, 106439511|LOC106439511, 106442268|LOC106442268, 106404349|LOC106404349	5	80
GO:0016847	1-aminocyclopropane-1-carboxylate synthase activity	Molecular Function	106384874|LOC106384874, 106385546|LOC106385546, 106438398|LOC106438398, 106447113|LOC106447113, 106385536|LOC106385536, 106445177|LOC106445177, 106388375|LOC106388375, 106449504|LOC106449504, 106357433|LOC106357433, 106409122|LOC106409122	0.1111	0.0430939	106385546|LOC106385546, 106438398|LOC106438398, 106447113|LOC106447113, 106385536|LOC106385536, 106445177|LOC106445177, 106388375|LOC106388375, 106409122|LOC106409122	7	106384874|LOC106384874, 106449504|LOC106449504, 106357433|LOC106357433	3	67
GO:0010200	response to chitin	Biological Process	106381425|LOC106381425, 106444576|LOC106444576, 106416580|LOC106416580, 106387754|LOC106387754, 106381656|LOC106381656, 106397757|LOC106397757, 106415461|LOC106415461, 106376460|LOC106376460, 106400711|LOC106400711, 106400794|LOC106400794, 106427905|LOC106427905, 106398204|LOC106398204, 106360826|LOC106360826, 106407379|LOC106407379, 106415257|LOC106415257, 106404606|LOC106404606, 106397525|LOC10…	0.3048	3.25747e-70	106381425|LOC106381425, 106444576|LOC106444576, 106416580|LOC106416580, 106381656|LOC106381656, 106397757|LOC106397757, 106415461|LOC106415461, 106376460|LOC106376460, 106400711|LOC106400711, 106400794|LOC106400794, 106427905|LOC106427905, 106398204|LOC106398204, 106360826|LOC106360826, 106407379|LOC106407379, 106415257|LOC106415257, 106404606|LOC106404606, 106397525|LOC106397525, 106415947|LOC10…	160	106387754|LOC106387754, 106386248|LOC106386248, 106385519|LOC106385519, 106390652|LOC106390652	4	429
GO:0006952	defense response	Biological Process	106445206|LOC106445206, 106376331|LOC106376331, 106381425|LOC106381425, 106444576|LOC106444576, 106381656|LOC106381656, 106359860|LOC106359860, 106454811|LOC106454811, 106446184|LOC106446184, 106427905|LOC106427905, 106451864|LOC106451864, 106398204|LOC106398204, 106360826|LOC106360826, 106345362|LOC106345362, 106450539|LOC106450539, 106354802|LOC106354802, 106362192|LOC106362192, 106378188|LOC10…	0.0998	2.16275e-08	106445206|LOC106445206, 106376331|LOC106376331, 106381425|LOC106381425, 106444576|LOC106444576, 106381656|LOC106381656, 106359860|LOC106359860, 106454811|LOC106454811, 106446184|LOC106446184, 106427905|LOC106427905, 106451864|LOC106451864, 106398204|LOC106398204, 106360826|LOC106360826, 106345362|LOC106345362, 106354802|LOC106354802, 106378188|LOC106378188, 106449673|LOC106449673, 106427808|LOC10…	101	106450539|LOC106450539, 106362192|LOC106362192, 106381705|LOC106381705, 106354474|LOC106354474, 106360354|LOC106360354, 106347727|LOC106347727, 106390402|LOC106390402, 106381704|LOC106381704, 106376712|LOC106376712, 106380155|LOC106380155, 106405722|LOC106405722, 106401225|LOC106401225, 106381341|LOC106381341, 106353831|LOC106353831, 106357767|LOC106357767, 106390088|LOC106390088, 106415590|LOC10…	23	952
GO:0009873	ethylene-activated signaling pathway	Biological Process	106365665|LOC106365665, 106454869|LOC106454869, 106381425|LOC106381425, 106364668|LOC106364668, 106444576|LOC106444576, 106416580|LOC106416580, 106349404|LOC106349404, 106381656|LOC106381656, 106397757|LOC106397757, 106400711|LOC106400711, 106443958|LOC106443958, 106400794|LOC106400794, 106439447|LOC106439447, 106446234|LOC106446234, 106348528|LOC106348528, 106427905|LOC106427905, 106364268|LOC10…	0.1365	1.3347e-16	106365665|LOC106365665, 106454869|LOC106454869, 106381425|LOC106381425, 106364668|LOC106364668, 106444576|LOC106444576, 106416580|LOC106416580, 106349404|LOC106349404, 106381656|LOC106381656, 106397757|LOC106397757, 106400711|LOC106400711, 106443958|LOC106443958, 106400794|LOC106400794, 106439447|LOC106439447, 106446234|LOC106446234, 106348528|LOC106348528, 106427905|LOC106427905, 106364268|LOC10…	110	106452069|LOC106452069, 106390402|LOC106390402, 106388621|LOC106388621, 106397750|LOC106397750, 106405117|LOC106405117, 106396528|LOC106396528	6	671
GO:0009651	response to salt stress	Biological Process	106397375|LOC106397375, 106454869|LOC106454869, 106354666|LOC106354666, 106445693|LOC106445693, 106388606|LOC106388606, 106452841|LOC106452841, 106352539|LOC106352539, 106446075|LOC106446075, 106415257|LOC106415257, 106387996|LOC106387996, 106446554|LOC106446554, 106349206|LOC106349206, 106438778|LOC106438778, 106368206|LOC106368206, 106377353|LOC106377353, 106346300|LOC106346300, 106380873|LOC10…	0.0751	0.0120446	106397375|LOC106397375, 106454869|LOC106454869, 106354666|LOC106354666, 106388606|LOC106388606, 106452841|LOC106452841, 106352539|LOC106352539, 106446075|LOC106446075, 106415257|LOC106415257, 106446554|LOC106446554, 106438778|LOC106438778, 106368206|LOC106368206, 106377353|LOC106377353, 106346300|LOC106346300, 106438147|LOC106438147, 106413930|LOC106413930, 106438996|LOC106438996, 106451279|LOC10…	75	106445693|LOC106445693, 106387996|LOC106387996, 106349206|LOC106349206, 106380873|LOC106380873, 106443611|LOC106443611, 106396928|LOC106396928, 106418272|LOC106418272, 106385519|LOC106385519, 106371894|LOC106371894, 106368228|LOC106368228, 106354484|LOC106354484, 106396960|LOC106396960, 106378711|LOC106378711, 106406840|LOC106406840, 106382903|LOC106382903, 106357767|LOC106357767, 106382723|LOC10…	26	1072
GO:0009414	response to water deprivation	Biological Process	106454869|LOC106454869, 106398710|LOC106398710, 106453499|LOC106453499, 106415257|LOC106415257, 106441065|LOC106441065, 106346300|LOC106346300, 106380873|LOC106380873, 106398717|LOC106398717, 106391436|LOC106391436, 106391435|LOC106391435, 106418272|LOC106418272, 106385519|LOC106385519, 106438147|LOC106438147, 106413930|LOC106413930, 106356928|LOC106356928, 106362332|LOC106362332, 106405881|LOC10…	0.1147	2.31821e-09	106454869|LOC106454869, 106398710|LOC106398710, 106415257|LOC106415257, 106441065|LOC106441065, 106346300|LOC106346300, 106398717|LOC106398717, 106391436|LOC106391436, 106391435|LOC106391435, 106438147|LOC106438147, 106413930|LOC106413930, 106356928|LOC106356928, 106362332|LOC106362332, 106405881|LOC106405881, 106370612|LOC106370612, 106399526|LOC106399526, 106390730|LOC106390730, 106358308|LOC10…	79	106453499|LOC106453499, 106380873|LOC106380873, 106418272|LOC106418272, 106385519|LOC106385519, 106348099|LOC106348099, 106348185|LOC106348185, 106416234|LOC106416234, 106354484|LOC106354484, 106381879|LOC106381879, 106381875|LOC106381875, 106445716|LOC106445716, 106390652|LOC106390652, 106406209|LOC106406209	13	665
GO:0009409	response to cold	Biological Process	106453198|LOC106453198, 106407453|LOC106407453, 106346389|LOC106346389, 106397015|LOC106397015, 106388606|LOC106388606, 106451056|LOC106451056, 106452841|LOC106452841, 106352539|LOC106352539, 106436527|LOC106436527, 106441544|LOC106441544, 106377353|LOC106377353, 106453080|LOC106453080, 106347512|LOC106347512, 106438040|LOC106438040, 106405163|LOC106405163, 106452368|LOC106452368, 106418272|LOC10…	0.0943	1.88324e-05	106407453|LOC106407453, 106346389|LOC106346389, 106397015|LOC106397015, 106388606|LOC106388606, 106452841|LOC106452841, 106352539|LOC106352539, 106436527|LOC106436527, 106441544|LOC106441544, 106377353|LOC106377353, 106347512|LOC106347512, 106438040|LOC106438040, 106405163|LOC106405163, 106438147|LOC106438147, 106376492|LOC106376492, 106371532|LOC106371532, 106405881|LOC106405881, 106353239|LOC10…	76	106453198|LOC106453198, 106451056|LOC106451056, 106453080|LOC106453080, 106452368|LOC106452368, 106418272|LOC106418272, 106398703|LOC106398703, 106366094|LOC106366094, 106381825|LOC106381825, 106354484|LOC106354484, 106396960|LOC106396960, 106381394|LOC106381394, 106389254|LOC106389254, 106381869|LOC106381869	13	759
GO:0009611	response to wounding	Biological Process	106453499|LOC106453499, 106402047|LOC106402047, 106402654|LOC106402654, 106365245|LOC106365245, 106454811|LOC106454811, 106446184|LOC106446184, 106451864|LOC106451864, 106352539|LOC106352539, 106377353|LOC106377353, 106430687|LOC106430687, 106347512|LOC106347512, 106386850|LOC106386850, 106405163|LOC106405163, 106439012|LOC106439012, 106355664|LOC106355664, 106369086|LOC106369086, 106372313|LOC10…	0.1452	2.69014e-13	106402047|LOC106402047, 106454811|LOC106454811, 106446184|LOC106446184, 106451864|LOC106451864, 106352539|LOC106352539, 106377353|LOC106377353, 106430687|LOC106430687, 106347512|LOC106347512, 106386850|LOC106386850, 106405163|LOC106405163, 106439012|LOC106439012, 106355664|LOC106355664, 106369086|LOC106369086, 106372313|LOC106372313, 106397650|LOC106397650, 106385138|LOC106385138, 106355665|LOC10…	73	106453499|LOC106453499, 106402654|LOC106402654, 106365245|LOC106365245, 106365244|LOC106365244, 106418315|LOC106418315, 106380158|LOC106380158, 106360475|LOC106360475	7	429
GO:0050832	defense response to fungus	Biological Process	106392423|LOC106392423, 106388606|LOC106388606, 106452501|LOC106452501, 106452811|LOC106452811, 106345353|LOC106345353, 106379059|LOC106379059, 106438040|LOC106438040, 106446122|LOC106446122, 106416182|LOC106416182, 106369777|LOC106369777, 106438147|LOC106438147, 106355664|LOC106355664, 106381787|LOC106381787, 106446123|LOC106446123, 106355665|LOC106355665, 106438995|LOC106438995, 106405881|LOC10…	0.1225	4.17253e-09	106388606|LOC106388606, 106452501|LOC106452501, 106452811|LOC106452811, 106345353|LOC106345353, 106379059|LOC106379059, 106438040|LOC106438040, 106446122|LOC106446122, 106416182|LOC106416182, 106369777|LOC106369777, 106438147|LOC106438147, 106355664|LOC106355664, 106446123|LOC106446123, 106355665|LOC106355665, 106438995|LOC106438995, 106405881|LOC106405881, 106450955|LOC106450955, 106381555|LOC10…	66	106392423|LOC106392423, 106381787|LOC106381787, 106381579|LOC106381579, 106351645|LOC106351645, 106391843|LOC106391843, 106396762|LOC106396762, 106378423|LOC106378423, 106445716|LOC106445716, 106406209|LOC106406209	9	431
GO:0009753	response to jasmonic acid	Biological Process	106454869|LOC106454869, 106453499|LOC106453499, 106402047|LOC106402047, 106439447|LOC106439447, 106454811|LOC106454811, 106446184|LOC106446184, 106452069|LOC106452069, 106430687|LOC106430687, 106385519|LOC106385519, 106439012|LOC106439012, 106395195|LOC106395195, 106369086|LOC106369086, 106372313|LOC106372313, 106358572|LOC106358572, 106370612|LOC106370612, 106358308|LOC106358308, 106438398|LOC10…	0.1191	8.93468e-07	106454869|LOC106454869, 106402047|LOC106402047, 106439447|LOC106439447, 106454811|LOC106454811, 106446184|LOC106446184, 106430687|LOC106430687, 106439012|LOC106439012, 106395195|LOC106395195, 106369086|LOC106369086, 106372313|LOC106372313, 106358572|LOC106358572, 106370612|LOC106370612, 106358308|LOC106358308, 106438398|LOC106438398, 106384946|LOC106384946, 106390324|LOC106390324, 106451788|LOC10…	50	106453499|LOC106453499, 106452069|LOC106452069, 106385519|LOC106385519, 106397750|LOC106397750, 106380158|LOC106380158, 106390652|LOC106390652	6	380
GO:0006979	response to oxidative stress	Biological Process	106442544|LOC106442544, 106400579|LOC106400579, 106346563|LOC106346563, 106411335|LOC106411335, 106445991|LOC106445991, 106451402|LOC106451402, 106354666|LOC106354666, 106451864|LOC106451864, 106390185|LOC106390185, 106412152|LOC106412152, 106451401|LOC106451401, 106391572|LOC106391572, 106347512|LOC106347512, 106386850|LOC106386850, 106405163|LOC106405163, 106396928|LOC106396928, 106369777|LOC10…	0.1082	2.2798e-05	106442544|LOC106442544, 106400579|LOC106400579, 106346563|LOC106346563, 106411335|LOC106411335, 106445991|LOC106445991, 106451402|LOC106451402, 106354666|LOC106354666, 106451864|LOC106451864, 106390185|LOC106390185, 106412152|LOC106412152, 106451401|LOC106451401, 106391572|LOC106391572, 106347512|LOC106347512, 106386850|LOC106386850, 106405163|LOC106405163, 106369777|LOC106369777, 106385138|LOC10…	50	106396928|LOC106396928, 106418428|LOC106418428, 106381931|LOC106381931, 106380476|LOC106380476	4	375
GO:0009751	response to salicylic acid	Biological Process	106454869|LOC106454869, 106354802|LOC106354802, 106391572|LOC106391572, 106430687|LOC106430687, 106446122|LOC106446122, 106385519|LOC106385519, 106355664|LOC106355664, 106397650|LOC106397650, 106447446|LOC106447446, 106358202|LOC106358202, 106446123|LOC106446123, 106355665|LOC106355665, 106370612|LOC106370612, 106358308|LOC106358308, 106381555|LOC106381555, 106384946|LOC106384946, 106390324|LOC10…	0.1182	6.38697e-06	106454869|LOC106454869, 106354802|LOC106354802, 106391572|LOC106391572, 106430687|LOC106430687, 106446122|LOC106446122, 106355664|LOC106355664, 106397650|LOC106397650, 106447446|LOC106447446, 106358202|LOC106358202, 106446123|LOC106446123, 106355665|LOC106355665, 106370612|LOC106370612, 106358308|LOC106358308, 106381555|LOC106381555, 106384946|LOC106384946, 106390324|LOC106390324, 106438055|LOC10…	43	106385519|LOC106385519, 106357767|LOC106357767, 106355040|LOC106355040, 106390652|LOC106390652, 106446380|LOC106446380	5	324
GO:0009733	response to auxin	Biological Process	106385158|LOC106385158, 106385519|LOC106385519, 106383045|LOC106383045, 106376492|LOC106376492, 106371532|LOC106371532, 106411322|LOC106411322, 106358308|LOC106358308, 106392333|LOC106392333, 106390324|LOC106390324, 106364157|LOC106364157, 106446344|LOC106446344, 106446343|LOC106446343, 106400624|LOC106400624, 106364156|LOC106364156, 106406981|LOC106406981, 106400623|LOC106400623, 106347054|LOC10…	0.0869	0.0085805	106383045|LOC106383045, 106376492|LOC106376492, 106371532|LOC106371532, 106411322|LOC106411322, 106358308|LOC106358308, 106392333|LOC106392333, 106390324|LOC106390324, 106446344|LOC106446344, 106446343|LOC106446343, 106400624|LOC106400624, 106406981|LOC106406981, 106400623|LOC106400623, 106347054|LOC106347054, 106449819|LOC106449819, 106402856|LOC106402856, 106429199|LOC106429199, 106351956|LOC10…	35	106385158|LOC106385158, 106385519|LOC106385519, 106364157|LOC106364157, 106364156|LOC106364156, 106345955|LOC106345955, 106441896|LOC106441896, 106392405|LOC106392405, 106418315|LOC106418315, 106453706|LOC106453706, 106390652|LOC106390652	10	402
GO:0009408	response to heat	Biological Process	106401075|LOC106401075, 106452841|LOC106452841, 106386850|LOC106386850, 106376492|LOC106376492, 106413930|LOC106413930, 106385138|LOC106385138, 106451510|LOC106451510, 106371532|LOC106371532, 106399526|LOC106399526, 106401239|LOC106401239, 106446344|LOC106446344, 106446343|LOC106446343, 106400635|LOC106400635, 106400624|LOC106400624, 106402021|LOC106402021, 106379918|LOC106379918, 106360182|LOC10…	0.0859	0.0160275	106401075|LOC106401075, 106452841|LOC106452841, 106386850|LOC106386850, 106376492|LOC106376492, 106413930|LOC106413930, 106385138|LOC106385138, 106371532|LOC106371532, 106399526|LOC106399526, 106446344|LOC106446344, 106446343|LOC106446343, 106400635|LOC106400635, 106400624|LOC106400624, 106379918|LOC106379918, 106360182|LOC106360182, 106400623|LOC106400623, 106429199|LOC106429199, 106351956|LOC10…	29	106451510|LOC106451510, 106401239|LOC106401239, 106402021|LOC106402021, 106353095|LOC106353095, 106439354|LOC106439354, 106347195|LOC106347195, 106451511|LOC106451511, 106354342|LOC106354342, 106451531|LOC106451531, 106451533|LOC106451533	10	361
GO:0080167	response to karrikin	Biological Process	106453198|LOC106453198, 106447281|LOC106447281, 106438830|LOC106438830, 106447279|LOC106447279, 106387303|LOC106387303, 106348994|LOC106348994, 106384866|LOC106384866, 106354432|LOC106354432, 106348399|LOC106348399, 106391500|LOC106391500, 106353521|LOC106353521, 106349441|LOC106349441, 106453202|LOC106453202, 106438048|LOC106438048, 106347844|LOC106347844, 106446945|LOC106446945, 106381913|LOC10…	0.0818	0.0400039	106447281|LOC106447281, 106438830|LOC106438830, 106447279|LOC106447279, 106387303|LOC106387303, 106348994|LOC106348994, 106348399|LOC106348399, 106391500|LOC106391500, 106353521|LOC106353521, 106349441|LOC106349441, 106453202|LOC106453202, 106438048|LOC106438048, 106347844|LOC106347844, 106446945|LOC106446945, 106381913|LOC106381913, 106368968|LOC106368968, 106388515|LOC106388515, 106447220|LOC10…	28	106453198|LOC106453198, 106384866|LOC106384866, 106354432|LOC106354432, 106379322|LOC106379322, 106382832|LOC106382832, 106381930|LOC106381930, 106413725|LOC106413725	7	348
GO:0009626	plant-type hypersensitive response	Biological Process	106353701|LOC106353701, 106451428|LOC106451428, 106436527|LOC106436527, 106453648|LOC106453648, 106397630|LOC106397630, 106349443|LOC106349443, 106347512|LOC106347512, 106405163|LOC106405163, 106383093|LOC106383093, 106451762|LOC106451762, 106404781|LOC106404781, 106381591|LOC106381591, 106383239|LOC106383239, 106372154|LOC106372154, 106406449|LOC106406449, 106379501|LOC106379501, 106389211|LOC10…	0.0854	0.0416129	106353701|LOC106353701, 106436527|LOC106436527, 106397630|LOC106397630, 106349443|LOC106349443, 106347512|LOC106347512, 106405163|LOC106405163, 106383093|LOC106383093, 106451762|LOC106451762, 106404781|LOC106404781, 106383239|LOC106383239, 106406449|LOC106406449, 106379501|LOC106379501, 106389211|LOC106389211, 106412200|LOC106412200, 106379625|LOC106379625, 106354774|LOC106354774, 106399350|LOC10…	22	106451428|LOC106451428, 106453648|LOC106453648, 106381591|LOC106381591, 106372154|LOC106372154, 106380816|LOC106380816	5	237
GO:0009867	jasmonic acid mediated signaling pathway	Biological Process	106450539|LOC106450539, 106452501|LOC106452501, 106449673|LOC106449673, 106363636|LOC106363636, 106379059|LOC106379059, 106416182|LOC106416182, 106361961|LOC106361961, 106438205|LOC106438205, 106402878|LOC106402878, 106380156|LOC106380156, 106390699|LOC106390699, 106349368|LOC106349368, 106378600|LOC106378600, 106445151|LOC106445151, 106397247|LOC106397247, 106353064|LOC106353064, 106347362|LOC10…	0.1387	0.000111819	106452501|LOC106452501, 106449673|LOC106449673, 106379059|LOC106379059, 106416182|LOC106416182, 106361961|LOC106361961, 106402878|LOC106402878, 106380156|LOC106380156, 106390699|LOC106390699, 106349368|LOC106349368, 106378600|LOC106378600, 106445151|LOC106445151, 106397247|LOC106397247, 106353064|LOC106353064, 106347362|LOC106347362, 106452030|LOC106452030, 106347345|LOC106347345, 106395072|LOC10…	21	106450539|LOC106450539, 106363636|LOC106363636, 106438205|LOC106438205	3	144
GO:0009723	response to ethylene	Biological Process	106450539|LOC106450539, 106385519|LOC106385519, 106438996|LOC106438996, 106358308|LOC106358308, 106390324|LOC106390324, 106449819|LOC106449819, 106402856|LOC106402856, 106411298|LOC106411298, 106404904|LOC106404904, 106449302|LOC106449302, 106380107|LOC106380107, 106409250|LOC106409250, 106393512|LOC106393512, 106448040|LOC106448040, 106393801|LOC106393801, 106361412|LOC106361412, 106380158|LOC10…	0.0946	0.0265323	106438996|LOC106438996, 106358308|LOC106358308, 106390324|LOC106390324, 106449819|LOC106449819, 106402856|LOC106402856, 106411298|LOC106411298, 106449302|LOC106449302, 106409250|LOC106409250, 106393512|LOC106393512, 106448040|LOC106448040, 106393801|LOC106393801, 106361412|LOC106361412, 106452810|LOC106452810, 106390878|LOC106390878, 106375281|LOC106375281	15	106450539|LOC106450539, 106385519|LOC106385519, 106404904|LOC106404904, 106380107|LOC106380107, 106380158|LOC106380158, 106390652|LOC106390652	6	181
GO:0051865	protein autoubiquitination	Biological Process	106391436|LOC106391436, 106391435|LOC106391435, 106388139|LOC106388139, 106447354|LOC106447354, 106402418|LOC106402418, 106366950|LOC106366950, 106407421|LOC106407421, 106367827|LOC106367827, 106452503|LOC106452503, 106403778|LOC106403778, 106453706|LOC106453706, 106440054|LOC106440054, 106437872|LOC106437872, 106392160|LOC106392160, 106449116|LOC106449116, 106415132|LOC106415132, 106394968|LOC10…	0.1429	0.000534798	106391436|LOC106391436, 106391435|LOC106391435, 106388139|LOC106388139, 106447354|LOC106447354, 106402418|LOC106402418, 106366950|LOC106366950, 106407421|LOC106407421, 106367827|LOC106367827, 106452503|LOC106452503, 106440054|LOC106440054, 106437872|LOC106437872, 106392160|LOC106392160, 106449116|LOC106449116, 106415132|LOC106415132, 106394968|LOC106394968, 106415727|LOC106415727	16	106403778|LOC106403778, 106453706|LOC106453706	2	107
GO:0002679	respiratory burst involved in defense response	Biological Process	106391436|LOC106391436, 106391435|LOC106391435, 106388139|LOC106388139, 106447354|LOC106447354, 106402418|LOC106402418, 106366950|LOC106366950, 106407421|LOC106407421, 106367827|LOC106367827, 106452503|LOC106452503, 106440054|LOC106440054, 106437872|LOC106437872, 106392160|LOC106392160, 106449116|LOC106449116, 106415132|LOC106415132, 106394968|LOC106394968, 106385302|LOC106385302, 106415727|LOC10…	0.5484	1.89017e-13	106391436|LOC106391436, 106391435|LOC106391435, 106388139|LOC106388139, 106447354|LOC106447354, 106402418|LOC106402418, 106366950|LOC106366950, 106407421|LOC106407421, 106367827|LOC106367827, 106452503|LOC106452503, 106440054|LOC106440054, 106437872|LOC106437872, 106392160|LOC106392160, 106449116|LOC106449116, 106415132|LOC106415132, 106394968|LOC106394968, 106385302|LOC106385302, 106415727|LOC10…	17		0	31
GO:0009644	response to high light intensity	Biological Process	106451821|LOC106451821, 106451510|LOC106451510, 106347780|LOC106347780, 106401239|LOC106401239, 106407032|LOC106407032, 106347418|LOC106347418, 106353095|LOC106353095, 106418649|LOC106418649, 106451511|LOC106451511, 106418302|LOC106418302, 106387621|LOC106387621, 106354342|LOC106354342, 106391539|LOC106391539, 106451531|LOC106451531, 106451533|LOC106451533, 106383749|LOC106383749	0.1019	0.0268072	106347780|LOC106347780, 106407032|LOC106407032, 106347418|LOC106347418, 106418649|LOC106418649, 106418302|LOC106418302, 106387621|LOC106387621, 106391539|LOC106391539, 106383749|LOC106383749	8	106451821|LOC106451821, 106451510|LOC106451510, 106401239|LOC106401239, 106353095|LOC106353095, 106451511|LOC106451511, 106354342|LOC106354342, 106451531|LOC106451531, 106451533|LOC106451533	8	130
GO:0006073	cellular glucan metabolic process	Biological Process	106371532|LOC106371532, 106348099|LOC106348099, 106348185|LOC106348185, 106410734|LOC106410734, 106400624|LOC106400624, 106400623|LOC106400623, 106410736|LOC106410736, 106429199|LOC106429199, 106392059|LOC106392059, 106390181|LOC106390181, 106391891|LOC106391891, 106391591|LOC106391591, 106442795|LOC106442795, 106379737|LOC106379737, 106346512|LOC106346512	0.1648	0.00032427	106371532|LOC106371532, 106410734|LOC106410734, 106400624|LOC106400624, 106400623|LOC106400623, 106410736|LOC106410736, 106429199|LOC106429199, 106392059|LOC106392059, 106390181|LOC106390181, 106391891|LOC106391891, 106391591|LOC106391591, 106442795|LOC106442795, 106379737|LOC106379737, 106346512|LOC106346512	13	106348099|LOC106348099, 106348185|LOC106348185	2	67
GO:0009627	systemic acquired resistance	Biological Process	106354526|LOC106354526, 106397568|LOC106397568, 106356004|LOC106356004, 106353335|LOC106353335, 106438996|LOC106438996, 106353239|LOC106353239, 106445918|LOC106445918, 106445917|LOC106445917, 106355654|LOC106355654, 106369087|LOC106369087, 106353659|LOC106353659, 106377126|LOC106377126, 106346969|LOC106346969, 106452810|LOC106452810, 106439741|LOC106439741	0.1064	0.0223213	106354526|LOC106354526, 106397568|LOC106397568, 106356004|LOC106356004, 106353335|LOC106353335, 106438996|LOC106438996, 106353239|LOC106353239, 106445918|LOC106445918, 106445917|LOC106445917, 106355654|LOC106355654, 106369087|LOC106369087, 106353659|LOC106353659, 106377126|LOC106377126, 106346969|LOC106346969, 106452810|LOC106452810, 106439741|LOC106439741	15		0	102
GO:0042542	response to hydrogen peroxide	Biological Process	106376492|LOC106376492, 106451510|LOC106451510, 106401239|LOC106401239, 106446344|LOC106446344, 106446343|LOC106446343, 106406981|LOC106406981, 106351956|LOC106351956, 106353095|LOC106353095, 106452551|LOC106452551, 106394635|LOC106394635, 106451511|LOC106451511, 106347872|LOC106347872, 106354342|LOC106354342, 106451531|LOC106451531, 106451533|LOC106451533	0.1034	0.0278643	106376492|LOC106376492, 106446344|LOC106446344, 106446343|LOC106446343, 106406981|LOC106406981, 106351956|LOC106351956, 106452551|LOC106452551, 106394635|LOC106394635, 106347872|LOC106347872	8	106451510|LOC106451510, 106401239|LOC106401239, 106353095|LOC106353095, 106451511|LOC106451511, 106354342|LOC106354342, 106451531|LOC106451531, 106451533|LOC106451533	7	123
GO:0009615	response to virus	Biological Process	106354526|LOC106354526, 106397568|LOC106397568, 106356004|LOC106356004, 106438996|LOC106438996, 106381700|LOC106381700, 106382849|LOC106382849, 106369087|LOC106369087, 106401239|LOC106401239, 106353095|LOC106353095, 106353659|LOC106353659, 106377126|LOC106377126, 106346969|LOC106346969, 106452810|LOC106452810, 106350139|LOC106350139, 106446423|LOC106446423	0.0987	0.0399145	106354526|LOC106354526, 106397568|LOC106397568, 106356004|LOC106356004, 106438996|LOC106438996, 106369087|LOC106369087, 106353659|LOC106353659, 106377126|LOC106377126, 106346969|LOC106346969, 106452810|LOC106452810, 106446423|LOC106446423	10	106381700|LOC106381700, 106382849|LOC106382849, 106401239|LOC106401239, 106353095|LOC106353095, 106350139|LOC106350139	5	116
GO:0010224	response to UV-B	Biological Process	106453031|LOC106453031, 106386850|LOC106386850, 106385138|LOC106385138, 106354445|LOC106354445, 106452551|LOC106452551, 106391500|LOC106391500, 106356213|LOC106356213, 106452885|LOC106452885, 106388515|LOC106388515, 106388514|LOC106388514, 106416646|LOC106416646, 106345289|LOC106345289, 106411089|LOC106411089, 106412179|LOC106412179	0.1458	0.00173883	106453031|LOC106453031, 106386850|LOC106386850, 106385138|LOC106385138, 106452551|LOC106452551, 106391500|LOC106391500, 106356213|LOC106356213, 106388515|LOC106388515, 106388514|LOC106388514, 106416646|LOC106416646, 106345289|LOC106345289, 106411089|LOC106411089, 106412179|LOC106412179	12	106354445|LOC106354445, 106452885|LOC106452885	2	80
GO:0048046	apoplast	Cellular Component	106453029|LOC106453029, 106451769|LOC106451769, 106407453|LOC106407453, 106388606|LOC106388606, 106451049|LOC106451049, 106392146|LOC106392146, 106354526|LOC106354526, 106453054|LOC106453054, 106397568|LOC106397568, 106436527|LOC106436527, 106441544|LOC106441544, 106356004|LOC106356004, 106366310|LOC106366310, 106394469|LOC106394469, 106452368|LOC106452368, 106386759|LOC106386759, 106442523|LOC10…	0.0934	1.40462e-06	106453029|LOC106453029, 106451769|LOC106451769, 106407453|LOC106407453, 106388606|LOC106388606, 106392146|LOC106392146, 106354526|LOC106354526, 106397568|LOC106397568, 106436527|LOC106436527, 106441544|LOC106441544, 106356004|LOC106356004, 106394469|LOC106394469, 106371532|LOC106371532, 106367244|LOC106367244, 106353239|LOC106353239, 106445918|LOC106445918, 106393609|LOC106393609, 106445917|LOC10…	88	106451049|LOC106451049, 106453054|LOC106453054, 106366310|LOC106366310, 106452368|LOC106452368, 106386759|LOC106386759, 106442523|LOC106442523, 106371587|LOC106371587, 106369684|LOC106369684, 106379886|LOC106379886, 106348099|LOC106348099, 106348185|LOC106348185, 106382914|LOC106382914, 106351645|LOC106351645, 106382254|LOC106382254, 106388444|LOC106388444, 106399495|LOC106399495, 106441311|LOC10…	30	960
GO:0000151	ubiquitin ligase complex	Cellular Component	106384828|LOC106384828, 106396879|LOC106396879, 106391436|LOC106391436, 106391435|LOC106391435, 106368214|LOC106368214, 106438954|LOC106438954, 106390073|LOC106390073, 106388139|LOC106388139, 106447354|LOC106447354, 106402418|LOC106402418, 106366950|LOC106366950, 106360722|LOC106360722, 106347598|LOC106347598, 106407421|LOC106407421, 106366309|LOC106366309, 106438271|LOC106438271, 106358375|LOC10…	0.1228	2.2653e-06	106391436|LOC106391436, 106391435|LOC106391435, 106438954|LOC106438954, 106388139|LOC106388139, 106447354|LOC106447354, 106402418|LOC106402418, 106366950|LOC106366950, 106360722|LOC106360722, 106347598|LOC106347598, 106407421|LOC106407421, 106366309|LOC106366309, 106438271|LOC106438271, 106358375|LOC106358375, 106361888|LOC106361888, 106367827|LOC106367827, 106452503|LOC106452503, 106446341|LOC10…	40	106384828|LOC106384828, 106396879|LOC106396879, 106368214|LOC106368214, 106390073|LOC106390073, 106350340|LOC106350340, 106403778|LOC106403778, 106369009|LOC106369009, 106382742|LOC106382742	8	314
GO:0008287	protein serine/threonine phosphatase complex	Cellular Component	106372621|LOC106372621, 106352748|LOC106352748, 106396362|LOC106396362, 106390593|LOC106390593, 106389762|LOC106389762, 106382622|LOC106382622, 106397114|LOC106397114, 106397784|LOC106397784, 106414112|LOC106414112, 106446984|LOC106446984, 106397880|LOC106397880, 106361058|LOC106361058, 106348417|LOC106348417, 106387890|LOC106387890, 106361085|LOC106361085, 106368514|LOC106368514, 106451999|LOC10…	0.0973	0.0297538	106352748|LOC106352748, 106396362|LOC106396362, 106414112|LOC106414112, 106446984|LOC106446984, 106397880|LOC106397880, 106361058|LOC106361058, 106348417|LOC106348417, 106387890|LOC106387890, 106361085|LOC106361085, 106368514|LOC106368514, 106451999|LOC106451999, 106441147|LOC106441147	12	106372621|LOC106372621, 106390593|LOC106390593, 106389762|LOC106389762, 106382622|LOC106382622, 106397114|LOC106397114, 106397784|LOC106397784	6	153
GO:0005625	obsolete soluble fraction	Cellular Component	106352877|LOC106352877, 106445274|LOC106445274, 106441506|LOC106441506, 106368861|LOC106368861, 106365561|LOC106365561, 106445572|LOC106445572, 106346735|LOC106346735, 106354551|LOC106354551, 106451608|LOC106451608, 106439074|LOC106439074, 106365663|LOC106365663	0.1358	0.00888055	106352877|LOC106352877, 106441506|LOC106441506, 106368861|LOC106368861, 106365561|LOC106365561, 106445572|LOC106445572, 106346735|LOC106346735, 106439074|LOC106439074, 106365663|LOC106365663	8	106445274|LOC106445274, 106354551|LOC106354551, 106451608|LOC106451608	3	66
GO:0009295	nucleoid	Cellular Component	106346112|LOC106346112, 106400535|LOC106400535, 106400536|LOC106400536, 106345298|LOC106345298, 106382881|LOC106382881, 106349089|LOC106349089, 106390921|LOC106390921	0.2414	0.00133878	106346112|LOC106346112, 106400535|LOC106400535, 106400536|LOC106400536, 106345298|LOC106345298, 106382881|LOC106382881, 106349089|LOC106349089, 106390921|LOC106390921	7		0	24
GO:0031012	extracellular matrix	Cellular Component	106367594|LOC106367594, 106381800|LOC106381800, 106416425|LOC106416425, 106376598|LOC106376598, 106347235|LOC106347235	0.1852	0.0206202	106367594|LOC106367594, 106381800|LOC106381800, 106416425|LOC106416425, 106376598|LOC106376598, 106347235|LOC106347235	5		0	23
GO:0005663	DNA replication factor C complex	Cellular Component	106382564|LOC106382564, 106448019|LOC106448019, 106389611|LOC106389611, 106445587|LOC106445587, 106382566|LOC106382566	0.1724	0.0274893		0	106382564|LOC106382564, 106448019|LOC106448019, 106389611|LOC106389611, 106445587|LOC106445587, 106382566|LOC106382566	5	24
GO:0031391	Elg1 RFC-like complex	Cellular Component	106382564|LOC106382564, 106448019|LOC106448019, 106445587|LOC106445587, 106382566|LOC106382566	0.6667	0.000175395		0	106382564|LOC106382564, 106448019|LOC106448019, 106445587|LOC106445587, 106382566|LOC106382566	4	6
GO:0031389	Rad17 RFC-like complex	Cellular Component	106382564|LOC106382564, 106448019|LOC106448019, 106445587|LOC106445587, 106382566|LOC106382566	0.6667	0.000175395		0	106382564|LOC106382564, 106448019|LOC106448019, 106445587|LOC106445587, 106382566|LOC106382566	4	6
GO:0005814	centriole	Cellular Component	106446112|LOC106446112, 106445717|LOC106445717, 106405476|LOC106405476, 106358363|LOC106358363	0.2	0.0288684	106405476|LOC106405476, 106358363|LOC106358363	2	106446112|LOC106446112, 106445717|LOC106445717	2	16
GO:0016591	RNA polymerase II, holoenzyme	Cellular Component	106348913|LOC106348913, 106382268|LOC106382268, 106382484|LOC106382484	0.3333	0.0137582		0	106348913|LOC106348913, 106382268|LOC106382268, 106382484|LOC106382484	3	9
GO:0005911	cell-cell junction	Cellular Component	106367596|LOC106367596, 106397083|LOC106397083, 106347232|LOC106347232	0.25	0.0314916	106367596|LOC106367596, 106397083|LOC106397083, 106347232|LOC106347232	3		0	9
GO:0032126	eisosome	Cellular Component	106354144|LOC106354144, 106396777|LOC106396777	1	0.00359356		0	106354144|LOC106354144, 106396777|LOC106396777	2	2
GO:0000506	glycosylphosphatidylinositol-N-acetylglucosaminyltransferase (GPI-GnT) complex	Cellular Component	106370718|LOC106370718, 106372585|LOC106372585	0.5	0.0198774	106372585|LOC106372585	1	106370718|LOC106370718	1	2
