# Supplementary material for: Cytokinin Signaling Are Required for Multi-Main Stems Development in <em>Brassica napus</em> L.
Source: Preprints.org preprint supplement (doi:10.20944/preprints202304.0586.v1), 2023-04-19
Supplement: Supplementary file 4 [file Table S3.xlsx]

## Sheet: MT VS ST 15
Supplemental Data 3. KEGG analysis of DEGs between MS mutant and WT at different DAG.
ST: Time after germination of single-stem plants (WT), MT: Time after germination of multi-stems (MS) mutants.
TOP10 KEGG pathways were marked out.
Pathway_ID	KEGG_Level_1	KEGG_Level_2	Pathway_Name	neglog10P	P.value	IDs
bna00591	Metabolism	Lipid metabolism	Linoleic acid metabolism	7.34786	4.48888e-08	106406326|LOC106406326, 106353868|LOC106353868, 106380862|LOC106380862, 106377836|LOC106377836, 106377834|LOC106377834, 106355888|LOC106355888, 106403712|LOC106403712, 106352821|LOC106352821, 106377835|LOC106377835, 106389295|LOC106389295, 106410653|LOC106410653
bna00592	Metabolism	Lipid metabolism	alpha-Linolenic acid metabolism	4.83624	1.45802e-05	106453030|LOC106453030, 106349686|LOC106349686, 106401486|LOC106401486, 106406326|LOC106406326, 106353868|LOC106353868, 106380862|LOC106380862, 106377836|LOC106377836, 106377834|LOC106377834, 106355888|LOC106355888, 106348746|LOC106348746, 106392161|LOC106392161, 106403712|LOC106403712, 106377835|LOC106377835, 106410653|LOC106410653
bna00640	Metabolism	Carbohydrate metabolism	Propanoate metabolism	2.71272	0.00193765	106400945|LOC106400945, 106348748|LOC106348748, 106349745|LOC106349745, 106452089|LOC106452089, 106372160|LOC106372160, 106446950|LOC106446950, 106396384|LOC106396384, 106374831|LOC106374831
bna00071	Metabolism	Lipid metabolism	Fatty acid degradation	2.55597	0.00277992	106349686|LOC106349686, 106400945|LOC106400945, 106348748|LOC106348748, 106401486|LOC106401486, 106348746|LOC106348746, 106397390|LOC106397390, 106392161|LOC106392161, 106374831|LOC106374831, 106356928|LOC106356928, 106396546|LOC106396546
bna00410	Metabolism	Metabolism of other amino acids	beta-Alanine metabolism	2.48584	0.00326709	106400945|LOC106400945, 106348748|LOC106348748, 106446950|LOC106446950, 106356928|LOC106356928, 106440920|LOC106440920, 106431049|LOC106431049, 106387720|LOC106387720, 106366710|LOC106366710, 106431030|LOC106431030, 106396546|LOC106396546
bna03010	Genetic Information Processing	Translation	Ribosome	2.47341	0.00336194	106376336|LOC106376336, 106433407|LOC106433407, 106400541|LOC106400541, 106372613|LOC106372613, 106390601|LOC106390601, 106365667|LOC106365667, 106365674|LOC106365674, 106433369|LOC106433369, 106366833|LOC106366833, 106397227|LOC106397227, 106445693|LOC106445693, 106354685|LOC106354685, 106369660|LOC106369660, 106362022|LOC106362022, 106400542|LOC106400542, 106345957|LOC106345957, 106398690|LOC10…
bna01212	Metabolism	Global and overview maps	Fatty acid metabolism	2.19222	0.00642361	106349686|LOC106349686, 106400945|LOC106400945, 106348748|LOC106348748, 106366808|LOC106366808, 106401486|LOC106401486, 106349745|LOC106349745, 106381763|LOC106381763, 106348746|LOC106348746, 106397390|LOC106397390, 106372160|LOC106372160, 106447907|LOC106447907, 106374831|LOC106374831, 106381762|LOC106381762
bna00945	Metabolism	Biosynthesis of other secondary metabolites	Stilbenoid, diarylheptanoid and gingerol biosynthesis	2.03691	0.00918533	106387189|LOC106387189, 106387187|LOC106387187, 106381125|LOC106381125, 106381124|LOC106381124, 106357144|LOC106357144
bna00590	Metabolism	Lipid metabolism	Arachidonic acid metabolism	2.01602	0.00963785	106445991|LOC106445991, 106451402|LOC106451402, 106451401|LOC106451401, 106390185|LOC106390185, 106389295|LOC106389295, 106445691|LOC106445691
bna00280	Metabolism	Amino acid metabolism	Valine, leucine and isoleucine degradation	1.90191	0.012534	106400945|LOC106400945, 106348748|LOC106348748, 106452089|LOC106452089, 106452226|LOC106452226, 106446950|LOC106446950, 106374831|LOC106374831, 106356928|LOC106356928, 106390423|LOC106390423, 106396546|LOC106396546
bna00500	Metabolism	Carbohydrate metabolism	Starch and sucrose metabolism	1.80053	0.0158295	106354691|LOC106354691, 106387146|LOC106387146, 106387147|LOC106387147, 106354550|LOC106354550, 106391383|LOC106391383, 106447959|LOC106447959, 106415110|LOC106415110, 106439027|LOC106439027, 106380048|LOC106380048, 106387293|LOC106387293, 106423856|LOC106423856, 106375909|LOC106375909, 106394738|LOC106394738, 106415017|LOC106415017, 106452309|LOC106452309, 106414967|LOC106414967, 106410155|LOC10…
bna00650	Metabolism	Carbohydrate metabolism	Butanoate metabolism	1.49812	0.0317601	106354787|LOC106354787, 106374831|LOC106374831, 106404391|LOC106404391, 106387720|LOC106387720, 106366710|LOC106366710
bna04075	Environmental Information Processing	Signal transduction	Plant hormone signal transduction	1.32294	0.0475403	106453025|LOC106453025, 106433425|LOC106433425, 106351463|LOC106351463, 106365665|LOC106365665, 106399276|LOC106399276, 106444036|LOC106444036, 106368908|LOC106368908, 106453059|LOC106453059, 106451127|LOC106451127, 106417632|LOC106417632, 106450801|LOC106450801, 106366820|LOC106366820, 106369090|LOC106369090, 106454643|LOC106454643, 106359562|LOC106359562, 106416410|LOC106416410, 106450539|LOC10…
bna00790	Metabolism	Metabolism of cofactors and vitamins	Folate biosynthesis	1.31886	0.0479888	106354680|LOC106354680, 106411792|LOC106411792, 106354681|LOC106354681, 106382264|LOC106382264, 106379891|LOC106379891
bna00900	Metabolism	Metabolism of terpenoids and polyketides	Terpenoid backbone biosynthesis	1.15864	0.0694003	106450544|LOC106450544, 106384672|LOC106384672, 106385190|LOC106385190, 106354395|LOC106354395, 106374831|LOC106374831, 106386192|LOC106386192, 106385189|LOC106385189, 106387370|LOC106387370
bna04712	Organismal Systems	Environmental adaptation	Circadian rhythm - plant	1.14812	0.071101	106382607|LOC106382607, 106396525|LOC106396525, 106366040|LOC106366040, 106345289|LOC106345289, 106357361|LOC106357361, 106372421|LOC106372421
bna00254	Metabolism	Biosynthesis of other secondary metabolites	Aflatoxin biosynthesis	1.11298	0.0770947	106349745|LOC106349745
bna00052	Metabolism	Carbohydrate metabolism	Galactose metabolism	1.11128	0.0773971	106418461|LOC106418461, 106371466|LOC106371466, 106447959|LOC106447959, 106387293|LOC106387293, 106415017|LOC106415017, 106452309|LOC106452309, 106414967|LOC106414967, 106351119|LOC106351119
bna03410	Genetic Information Processing	Replication and repair	Base excision repair	1.06187	0.0867221	106412213|LOC106412213, 106357489|LOC106357489, 106354683|LOC106354683, 106368390|LOC106368390, 106356007|LOC106356007, 106385365|LOC106385365
bna00941	Metabolism	Biosynthesis of other secondary metabolites	Flavonoid biosynthesis	1.04825	0.0894854	106387189|LOC106387189, 106387187|LOC106387187, 106381125|LOC106381125, 106381124|LOC106381124, 106357144|LOC106357144
bna00760	Metabolism	Metabolism of cofactors and vitamins	Nicotinate and nicotinamide metabolism	1.03407	0.092455	106354690|LOC106354690, 106354689|LOC106354689, 106348464|LOC106348464, 106387404|LOC106387404
bna00061	Metabolism	Lipid metabolism	Fatty acid biosynthesis	1.02359	0.0947124	106366808|LOC106366808, 106349745|LOC106349745, 106381763|LOC106381763, 106397390|LOC106397390, 106372160|LOC106372160, 106447907|LOC106447907, 106381762|LOC106381762
bna00053	Metabolism	Carbohydrate metabolism	Ascorbate and aldarate metabolism	0.881855	0.131264	106453198|LOC106453198, 106440879|LOC106440879, 106371989|LOC106371989, 106407713|LOC106407713, 106356928|LOC106356928, 106368218|LOC106368218, 106396546|LOC106396546
bna00903	Metabolism	Metabolism of terpenoids and polyketides	Limonene and pinene degradation	0.853175	0.140225	106356928|LOC106356928, 106396546|LOC106396546
bna00196	Metabolism	Energy metabolism	Photosynthesis - antenna proteins	0.850822	0.140987	106447497|LOC106447497, 106439795|LOC106439795, 106349237|LOC106349237, 106401200|LOC106401200
bna00904	Metabolism	Metabolism of terpenoids and polyketides	Diterpenoid biosynthesis	0.704586	0.19743	106354788|LOC106354788, 106444436|LOC106444436, 106422857|LOC106422857, 106370917|LOC106370917
bna00966	Metabolism	Biosynthesis of other secondary metabolites	Glucosinolate biosynthesis	0.685313	0.206389	106379685|LOC106379685, 106377269|LOC106377269
bna00965	Metabolism	Biosynthesis of other secondary metabolites	Betalain biosynthesis	0.669694	0.213947	106359577|LOC106359577
bna00780	Metabolism	Metabolism of cofactors and vitamins	Biotin metabolism	0.635485	0.231481	106381763|LOC106381763, 106447907|LOC106447907, 106381762|LOC106381762
bna00450	Metabolism	Metabolism of other amino acids	Selenocompound metabolism	0.635485	0.231481	106410303|LOC106410303, 106355063|LOC106355063, 106356040|LOC106356040
bna00330	Metabolism	Amino acid metabolism	Arginine and proline metabolism	0.625333	0.236956	106350872|LOC106350872, 106361298|LOC106361298, 106356928|LOC106356928, 106440920|LOC106440920, 106431049|LOC106431049, 106431030|LOC106431030, 106396546|LOC106396546
bna00100	Metabolism	Lipid metabolism	Steroid biosynthesis	0.620245	0.239748	106366810|LOC106366810, 106368587|LOC106368587, 106371823|LOC106371823, 106395025|LOC106395025, 106366811|LOC106366811
bna00250	Metabolism	Amino acid metabolism	Alanine, aspartate and glutamate metabolism	0.611107	0.244846	106354787|LOC106354787, 106397664|LOC106397664, 106404391|LOC106404391, 106390423|LOC106390423, 106406022|LOC106406022, 106387720|LOC106387720, 106366710|LOC106366710
bna00440	Metabolism	Metabolism of other amino acids	Phosphonate and phosphinate metabolism	0.609903	0.245526	106404619|LOC106404619, 106404612|LOC106404612
bna00520	Metabolism	Carbohydrate metabolism	Amino sugar and nucleotide sugar metabolism	0.606747	0.247316	106349210|LOC106349210, 106387746|LOC106387746, 106366807|LOC106366807, 106415626|LOC106415626, 106352208|LOC106352208, 106387286|LOC106387286, 106349206|LOC106349206, 106389885|LOC106389885, 106451608|LOC106451608, 106416511|LOC106416511, 106387293|LOC106387293, 106368218|LOC106368218, 106368228|LOC106368228, 106390154|LOC106390154
bna00480	Metabolism	Metabolism of other amino acids	Glutathione metabolism	0.596283	0.253348	106349212|LOC106349212, 106445991|LOC106445991, 106451402|LOC106451402, 106371989|LOC106371989, 106451401|LOC106451401, 106390185|LOC106390185, 106354403|LOC106354403, 106401984|LOC106401984, 106445691|LOC106445691, 106394558|LOC106394558, 106382551|LOC106382551
bna00940	Metabolism	Biosynthesis of other secondary metabolites	Phenylpropanoid biosynthesis	0.595865	0.253591	106387189|LOC106387189, 106387146|LOC106387146, 106387147|LOC106387147, 106387187|LOC106387187, 106391383|LOC106391383, 106381125|LOC106381125, 106381124|LOC106381124, 106397772|LOC106397772, 106345263|LOC106345263, 106441062|LOC106441062, 106450296|LOC106450296, 106380232|LOC106380232, 106347962|LOC106347962, 106357144|LOC106357144, 106392662|LOC106392662, 106348078|LOC106348078, 106379250|LOC10…
bna00340	Metabolism	Amino acid metabolism	Histidine metabolism	0.585346	0.259809	106451798|LOC106451798, 106356928|LOC106356928, 106396546|LOC106396546
bna00785	Metabolism	Metabolism of cofactors and vitamins	Lipoic acid metabolism	0.561331	0.27458	106390779|LOC106390779
bna00905	Metabolism	Metabolism of terpenoids and polyketides	Brassinosteroid biosynthesis	0.530571	0.294733	106349108|LOC106349108, 106449738|LOC106449738
bna00920	Metabolism	Energy metabolism	Sulfur metabolism	0.530048	0.295088	106354773|LOC106354773, 106345635|LOC106345635, 106410303|LOC106410303, 106417713|LOC106417713, 106412042|LOC106412042
bna03440	Genetic Information Processing	Replication and repair	Homologous recombination	0.522767	0.300077	106451439|LOC106451439, 106371057|LOC106371057, 106357489|LOC106357489, 106453222|LOC106453222, 106354683|LOC106354683, 106397655|LOC106397655, 106452310|LOC106452310, 106356007|LOC106356007, 106346087|LOC106346087, 106385611|LOC106385611
bna00073	Metabolism	Lipid metabolism	Cutin, suberine and wax biosynthesis	0.513421	0.306605	106451050|LOC106451050, 106407020|LOC106407020, 106407983|LOC106407983, 106352703|LOC106352703
bna00310	Metabolism	Amino acid metabolism	Lysine degradation	0.472953	0.336548	106374831|LOC106374831, 106356928|LOC106356928, 106438508|LOC106438508, 106396546|LOC106396546
bna04933	Human Diseases	Endocrine and metabolic disease	AGE-RAGE signaling pathway in diabetic complications	0.46944	0.339282	106387397|LOC106387397, 106389484|LOC106389484, 106345783|LOC106345783
bna00360	Metabolism	Amino acid metabolism	Phenylalanine metabolism	0.392831	0.404733	106384874|LOC106384874, 106381125|LOC106381125, 106381124|LOC106381124, 106397772|LOC106397772, 106357144|LOC106357144
bna00561	Metabolism	Lipid metabolism	Glycerolipid metabolism	0.389195	0.408136	106400574|LOC106400574, 106452997|LOC106452997, 106387192|LOC106387192, 106356928|LOC106356928, 106352869|LOC106352869, 106354846|LOC106354846, 106368843|LOC106368843, 106396546|LOC106396546
bna00960	Metabolism	Biosynthesis of other secondary metabolites	Tropane, piperidine and pyridine alkaloid biosynthesis	0.376329	0.420408	106447281|LOC106447281, 106447279|LOC106447279, 106384874|LOC106384874, 106438347|LOC106438347
bna00620	Metabolism	Carbohydrate metabolism	Pyruvate metabolism	0.364299	0.432217	106349745|LOC106349745, 106452089|LOC106452089, 106372160|LOC106372160, 106443236|LOC106443236, 106374831|LOC106374831, 106356928|LOC106356928, 106380401|LOC106380401, 106396546|LOC106396546
bna00430	Metabolism	Metabolism of other amino acids	Taurine and hypotaurine metabolism	0.342027	0.454959	106387720|LOC106387720, 106366710|LOC106366710
bna00563	Metabolism	Glycan biosynthesis and metabolism	Glycosylphosphatidylinositol (GPI)-anchor biosynthesis	0.333695	0.463772	106370718|LOC106370718, 106372585|LOC106372585
bna03040	Genetic Information Processing	Transcription	Spliceosome	0.318177	0.480644	106346061|LOC106346061, 106406593|LOC106406593, 106388151|LOC106388151, 106366802|LOC106366802, 106382107|LOC106382107, 106453020|LOC106453020, 106389883|LOC106389883, 106387277|LOC106387277, 106383346|LOC106383346, 106410625|LOC106410625, 106376036|LOC106376036, 106451758|LOC106451758, 106401239|LOC106401239, 106351544|LOC106351544, 106353095|LOC106353095, 106447161|LOC106447161
bna04626	Organismal Systems	Environmental adaptation	Plant-pathogen interaction	0.296297	0.505479	106451762|LOC106451762, 106372374|LOC106372374, 106452100|LOC106452100, 106404489|LOC106404489, 106440010|LOC106440010, 106455068|LOC106455068, 106406419|LOC106406419, 106387429|LOC106387429, 106391602|LOC106391602, 106354846|LOC106354846, 106392211|LOC106392211, 106454440|LOC106454440, 106402849|LOC106402849, 106386144|LOC106386144, 106351767|LOC106351767, 106395329|LOC106395329
bna00910	Metabolism	Energy metabolism	Nitrogen metabolism	0.267396	0.540262	106354597|LOC106354597, 106370694|LOC106370694, 106362058|LOC106362058, 106397776|LOC106397776
bna00860	Metabolism	Metabolism of cofactors and vitamins	Porphyrin and chlorophyll metabolism	0.263073	0.545667	106354395|LOC106354395, 106440918|LOC106440918, 106380526|LOC106380526, 106390310|LOC106390310
bna03030	Genetic Information Processing	Replication and repair	DNA replication	0.260016	0.549521	106451439|LOC106451439, 106371057|LOC106371057, 106357489|LOC106357489, 106354683|LOC106354683, 106452310|LOC106452310, 106356007|LOC106356007, 106414278|LOC106414278, 106345194|LOC106345194
bna00333	Metabolism	Biosynthesis of other secondary metabolites	Prodigiosin biosynthesis	0.258061	0.552	106447907|LOC106447907
bna00240	Metabolism	Nucleotide metabolism	Pyrimidine metabolism	0.237625	0.578595	106418130|LOC106418130, 106357489|LOC106357489, 106401596|LOC106401596, 106354683|LOC106354683, 106397664|LOC106397664, 106356007|LOC106356007, 106435549|LOC106435549, 106386893|LOC106386893, 106414278|LOC106414278, 106365068|LOC106365068
bna04122	Genetic Information Processing	Folding, sorting and degradation	Sulfur relay system	0.215973	0.608173	106354773|LOC106354773
bna00909	Metabolism	Metabolism of terpenoids and polyketides	Sesquiterpenoid and triterpenoid biosynthesis	0.208636	0.618534	106354658|LOC106354658
bna00514	Metabolism	Glycan biosynthesis and metabolism	Other types of O-glycan biosynthesis	0.20161	0.628622	106365673|LOC106365673
bna00261	Metabolism	Biosynthesis of other secondary metabolites	Monobactam biosynthesis	0.188421	0.648006	106410303|LOC106410303
bna00350	Metabolism	Amino acid metabolism	Tyrosine metabolism	0.18705	0.650055	106384874|LOC106384874, 106392161|LOC106392161, 106380944|LOC106380944
bna00030	Metabolism	Carbohydrate metabolism	Pentose phosphate pathway	0.18047	0.659978	106349212|LOC106349212, 106371466|LOC106371466, 106348257|LOC106348257, 106356629|LOC106356629
bna00270	Metabolism	Amino acid metabolism	Cysteine and methionine metabolism	0.177981	0.663772	106350872|LOC106350872, 106354773|LOC106354773, 106345635|LOC106345635, 106384874|LOC106384874, 106390423|LOC106390423, 106395411|LOC106395411, 106394583|LOC106394583, 106399494|LOC106399494, 106412042|LOC106412042
bna00230	Metabolism	Nucleotide metabolism	Purine metabolism	0.177558	0.664419	106418130|LOC106418130, 106403511|LOC106403511, 106397137|LOC106397137, 106357489|LOC106357489, 106354683|LOC106354683, 106443236|LOC106443236, 106410303|LOC106410303, 106417713|LOC106417713, 106356007|LOC106356007, 106435549|LOC106435549, 106386893|LOC106386893, 106414278|LOC106414278
bna01040	Metabolism	Lipid metabolism	Biosynthesis of unsaturated fatty acids	0.168114	0.679026	106366808|LOC106366808, 106447907|LOC106447907
bna00562	Metabolism	Carbohydrate metabolism	Inositol phosphate metabolism	0.161545	0.689374	106453198|LOC106453198, 106440879|LOC106440879, 106387397|LOC106387397, 106407713|LOC106407713, 106380477|LOC106380477
bna00901	Metabolism	Biosynthesis of other secondary metabolites	Indole alkaloid biosynthesis	0.159791	0.692165	106379410|LOC106379410
bna03060	Genetic Information Processing	Folding, sorting and degradation	Protein export	0.158105	0.694857	106453034|LOC106453034, 106451803|LOC106451803, 106347521|LOC106347521, 106371215|LOC106371215
bna04141	Genetic Information Processing	Folding, sorting and degradation	Protein processing in endoplasmic reticulum	0.157947	0.69511	106386751|LOC106386751, 106451283|LOC106451283, 106397237|LOC106397237, 106397623|LOC106397623, 106451757|LOC106451757, 106376036|LOC106376036, 106347892|LOC106347892, 106401239|LOC106401239, 106351544|LOC106351544, 106417036|LOC106417036, 106359732|LOC106359732, 106353095|LOC106353095, 106377322|LOC106377322, 106416798|LOC106416798, 106452985|LOC106452985, 106371215|LOC106371215
bna00400	Metabolism	Amino acid metabolism	Phenylalanine, tyrosine and tryptophan biosynthesis	0.155503	0.699032	106397587|LOC106397587, 106438690|LOC106438690, 106384874|LOC106384874, 106389628|LOC106389628
bna04136	Cellular Processes	Transport and catabolism	Autophagy - other	0.154787	0.700185	106404501|LOC106404501, 106388224|LOC106388224, 106438243|LOC106438243
bna00906	Metabolism	Metabolism of terpenoids and polyketides	Carotenoid biosynthesis	0.146525	0.713633	106422159|LOC106422159, 106370541|LOC106370541
bna00750	Metabolism	Metabolism of cofactors and vitamins	Vitamin B6 metabolism	0.140576	0.723476	106369031|LOC106369031
bna00380	Metabolism	Amino acid metabolism	Tryptophan metabolism	0.128034	0.744674	106374831|LOC106374831, 106356928|LOC106356928, 106396546|LOC106396546
bna00630	Metabolism	Carbohydrate metabolism	Glyoxylate and dicarboxylate metabolism	0.123736	0.75208	106452089|LOC106452089, 106380594|LOC106380594, 106415908|LOC106415908, 106402980|LOC106402980, 106374831|LOC106374831, 106406022|LOC106406022
bna03420	Genetic Information Processing	Replication and repair	Nucleotide excision repair	0.123497	0.752495	106451439|LOC106451439, 106371057|LOC106371057, 106357489|LOC106357489, 106453031|LOC106453031, 106354683|LOC106354683, 106452310|LOC106452310, 106356007|LOC106356007
bna00460	Metabolism	Metabolism of other amino acids	Cyanoamino acid metabolism	0.10576	0.783864	106387146|LOC106387146, 106387147|LOC106387147, 106391383|LOC106391383, 106372481|LOC106372481
bna04070	Environmental Information Processing	Signal transduction	Phosphatidylinositol signaling system	0.102396	0.789958	106453198|LOC106453198, 106387192|LOC106387192, 106387397|LOC106387397, 106380477|LOC106380477, 106368843|LOC106368843
bna00260	Metabolism	Amino acid metabolism	Glycine, serine and threonine metabolism	0.0992757	0.795654	106452089|LOC106452089, 106415908|LOC106415908, 106390423|LOC106390423, 106406022|LOC106406022, 106360819|LOC106360819
bna00510	Metabolism	Glycan biosynthesis and metabolism	N-Glycan biosynthesis	0.0943489	0.804732	106386751|LOC106386751, 106451303|LOC106451303, 106451304|LOC106451304
bna03430	Genetic Information Processing	Replication and repair	Mismatch repair	0.0932966	0.806684	106451439|LOC106451439, 106371057|LOC106371057, 106354683|LOC106354683, 106452310|LOC106452310, 106356007|LOC106356007
bna00908	Metabolism	Metabolism of terpenoids and polyketides	Zeatin biosynthesis	0.0914765	0.810072	106370472|LOC106370472
bna00051	Metabolism	Carbohydrate metabolism	Fructose and mannose metabolism	0.0892113	0.814308	106366807|LOC106366807, 106387286|LOC106387286, 106371466|LOC106371466, 106416511|LOC106416511
bna01200	Metabolism	Global and overview maps	Carbon metabolism	0.0884883	0.815665	106365675|LOC106365675, 106349212|LOC106349212, 106400945|LOC106400945, 106348748|LOC106348748, 106452089|LOC106452089, 106452368|LOC106452368, 106380594|LOC106380594, 106345635|LOC106345635, 106372160|LOC106372160, 106371466|LOC106371466, 106443236|LOC106443236, 106446950|LOC106446950, 106415908|LOC106415908, 106348257|LOC106348257, 106402980|LOC106402980, 106396384|LOC106396384, 106374831|LOC10…
bna00010	Metabolism	Carbohydrate metabolism	Glycolysis / Gluconeogenesis	0.0871594	0.818164	106365675|LOC106365675, 106452089|LOC106452089, 106452368|LOC106452368, 106371466|LOC106371466, 106443236|LOC106443236, 106392161|LOC106392161, 106356928|LOC106356928, 106396546|LOC106396546
bna03050	Genetic Information Processing	Folding, sorting and degradation	Proteasome	0.083302	0.825464	106451289|LOC106451289, 106354769|LOC106354769, 106401780|LOC106401780, 106451769|LOC106451769
bna04120	Genetic Information Processing	Folding, sorting and degradation	Ubiquitin mediated proteolysis	0.0825404	0.826913	106379602|LOC106379602, 106402927|LOC106402927, 106404546|LOC106404546, 106451281|LOC106451281, 106348419|LOC106348419, 106366040|LOC106366040, 106374319|LOC106374319, 106369853|LOC106369853, 106401092|LOC106401092
bna04145	Cellular Processes	Transport and catabolism	Phagosome	0.0749371	0.841517	106385711|LOC106385711, 106438778|LOC106438778, 106354666|LOC106354666, 106406303|LOC106406303, 106389484|LOC106389484, 106371215|LOC106371215, 106345783|LOC106345783
bna00950	Metabolism	Biosynthesis of other secondary metabolites	Isoquinoline alkaloid biosynthesis	0.0722268	0.846785	106384874|LOC106384874
bna00130	Metabolism	Metabolism of cofactors and vitamins	Ubiquinone and other terpenoid-quinone biosynthesis	0.0694329	0.85225	106384874|LOC106384874, 106397772|LOC106397772
bna00600	Metabolism	Lipid metabolism	Sphingolipid metabolism	0.0624616	0.866041	106400578|LOC106400578
bna00564	Metabolism	Lipid metabolism	Glycerophospholipid metabolism	0.0571682	0.876661	106387192|LOC106387192, 106404619|LOC106404619, 106404612|LOC106404612, 106354807|LOC106354807, 106354682|LOC106354682, 106368843|LOC106368843
bna04146	Cellular Processes	Transport and catabolism	Peroxisome	0.0517732	0.887619	106397390|LOC106397390, 106380594|LOC106380594, 106452364|LOC106452364, 106351060|LOC106351060, 106407020|LOC106407020
bna00290	Metabolism	Amino acid metabolism	Valine, leucine and isoleucine biosynthesis	0.051093	0.889011	106379685|LOC106379685
bna00040	Metabolism	Carbohydrate metabolism	Pentose and glucuronate interconversions	0.0469156	0.897603	106452978|LOC106452978, 106410328|LOC106410328, 106362606|LOC106362606, 106387293|LOC106387293, 106368218|LOC106368218, 106391816|LOC106391816
bna01210	Metabolism	Global and overview maps	2-Oxocarboxylic acid metabolism	0.0459833	0.899532	106402980|LOC106402980, 106379685|LOC106379685, 106406022|LOC106406022, 106377269|LOC106377269
bna00565	Metabolism	Lipid metabolism	Ether lipid metabolism	0.0456004	0.900326	106354807|LOC106354807
bna03020	Genetic Information Processing	Transcription	RNA polymerase	0.0432188	0.905276	106435549|LOC106435549, 106386893|LOC106386893
bna00020	Metabolism	Carbohydrate metabolism	Citrate cycle (TCA cycle)	0.040866	0.910194	106452089|LOC106452089, 106402980|LOC106402980, 106396384|LOC106396384
bna04130	Genetic Information Processing	Folding, sorting and degradation	SNARE interactions in vesicular transport	0.0403812	0.911211	106402296|LOC106402296, 106414571|LOC106414571
bna03008	Genetic Information Processing	Translation	Ribosome biogenesis in eukaryotes	0.0354201	0.92168	106445315|LOC106445315, 106389696|LOC106389696, 106377952|LOC106377952, 106451761|LOC106451761, 106380523|LOC106380523
bna00195	Metabolism	Energy metabolism	Photosynthesis	0.025293	0.943424	106397576|LOC106397576, 106415703|LOC106415703, 106380499|LOC106380499
bna04016	Environmental Information Processing	Signal transduction	MAPK signaling pathway - plant	0.0218521	0.950929	106365665|LOC106365665, 106366820|LOC106366820, 106454643|LOC106454643, 106391602|LOC106391602, 106391984|LOC106391984, 106440679|LOC106440679, 106395329|LOC106395329, 106427953|LOC106427953
bna00970	Genetic Information Processing	Translation	Aminoacyl-tRNA biosynthesis	0.0210745	0.952633	106365664|LOC106365664, 106441506|LOC106441506, 106365663|LOC106365663
bna00710	Metabolism	Energy metabolism	Carbon fixation in photosynthetic organisms	0.0158227	0.964223	106365675|LOC106365675, 106452368|LOC106452368, 106406022|LOC106406022
bna00220	Metabolism	Amino acid metabolism	Arginine biosynthesis	0.0117283	0.973356	106406022|LOC106406022
bna03018	Genetic Information Processing	Folding, sorting and degradation	RNA degradation	0.0114476	0.973985	106418130|LOC106418130, 106438830|LOC106438830, 106371466|LOC106371466, 106451758|LOC106451758, 106362281|LOC106362281
bna03022	Genetic Information Processing	Transcription	Basal transcription factors	0.00737673	0.983158	106364104|LOC106364104
bna04144	Cellular Processes	Transport and catabolism	Endocytosis	0.00583087	0.986664	106361087|LOC106361087, 106405411|LOC106405411, 106376036|LOC106376036, 106406303|LOC106406303, 106401239|LOC106401239, 106351544|LOC106351544, 106353095|LOC106353095, 106381813|LOC106381813
bna01230	Metabolism	Global and overview maps	Biosynthesis of amino acids	0.00410546	0.990591	106365675|LOC106365675, 106451798|LOC106451798, 106397587|LOC106397587, 106438690|LOC106438690, 106452368|LOC106452368, 106345635|LOC106345635, 106384874|LOC106384874, 106371466|LOC106371466, 106443236|LOC106443236, 106389628|LOC106389628, 106402980|LOC106402980, 106406022|LOC106406022, 106412042|LOC106412042
bna00190	Metabolism	Energy metabolism	Oxidative phosphorylation	0.00363783	0.991659	106406037|LOC106406037, 106438778|LOC106438778, 106444819|LOC106444819, 106354666|LOC106354666, 106384822|LOC106384822, 106358546|LOC106358546, 106354655|LOC106354655
bna03013	Genetic Information Processing	Translation	Nucleocytoplasmic transport	0.00102125	0.997651	106433386|LOC106433386, 106433858|LOC106433858, 106389825|LOC106389825, 106454812|LOC106454812, 106349121|LOC106349121, 106399915|LOC106399915
bna03015	Genetic Information Processing	Translation	mRNA surveillance pathway	6.45504e-05	0.999851	106418167|LOC106418167, 106351539|LOC106351539

## Sheet: MT VS ST 20
Supplemental Data 3. KEGG analysis of DEGs between MS mutant and WT at different DAG.
ST: Time after germination of single-stem plants (WT), MT: Time after germination of multi-stems (MS) mutants.
TOP10 KEGG pathways were marked out.
Pathway_ID	KEGG_Level_1	KEGG_Level_2	Pathway_Name	neglog10P	P.value	IDs
bna04626	Organismal Systems	Environmental adaptation	Plant-pathogen interaction	19.3195	4.79208e-20	106357116|LOC106357116, 106407133|LOC106407133, 106408214|LOC106408214, 106351956|LOC106351956, 106410758|LOC106410758, 106438147|LOC106438147, 106410925|LOC106410925, 106408965|LOC106408965, 106380873|LOC106380873, 106413314|LOC106413314, 106365654|LOC106365654, 106348958|LOC106348958, 106368206|LOC106368206, 106415996|LOC106415996, 106356945|LOC106356945, 106366339|LOC106366339, 106406020|LOC10…
bna04016	Environmental Information Processing	Signal transduction	MAPK signaling pathway - plant	5.30083	5.00231e-06	106445177|LOC106445177, 106407133|LOC106407133, 106408214|LOC106408214, 106438147|LOC106438147, 106410925|LOC106410925, 106365665|LOC106365665, 106365654|LOC106365654, 106348958|LOC106348958, 106402548|LOC106402548, 106406020|LOC106406020, 106447673|LOC106447673, 106450955|LOC106450955, 106399811|LOC106399811, 106407076|LOC106407076, 106410903|LOC106410903, 106451643|LOC106451643, 106352780|LOC10…
bna04075	Environmental Information Processing	Signal transduction	Plant hormone signal transduction	4.85477	1.39712e-05	106371281|LOC106371281, 106416522|LOC106416522, 106416521|LOC106416521, 106371532|LOC106371532, 106365665|LOC106365665, 106400623|LOC106400623, 106444036|LOC106444036, 106345589|LOC106345589, 106400624|LOC106400624, 106453059|LOC106453059, 106406807|LOC106406807, 106351463|LOC106351463, 106454839|LOC106454839, 106366639|LOC106366639, 106385306|LOC106385306, 106451643|LOC106451643, 106389840|LOC10…
bna00591	Metabolism	Lipid metabolism	Linoleic acid metabolism	4.05738	8.76226e-05	106377834|LOC106377834, 106406326|LOC106406326, 106353868|LOC106353868, 106410673|LOC106410673, 106377835|LOC106377835, 106352821|LOC106352821, 106403712|LOC106403712, 106355888|LOC106355888, 106380862|LOC106380862, 106377836|LOC106377836
bna00906	Metabolism	Metabolism of terpenoids and polyketides	Carotenoid biosynthesis	3.2924	0.000510029	106361235|LOC106361235, 106416491|LOC106416491, 106394225|LOC106394225, 106439368|LOC106439368, 106390565|LOC106390565, 106348955|LOC106348955, 106386394|LOC106386394, 106370541|LOC106370541, 106422159|LOC106422159, 106354700|LOC106354700, 106363948|LOC106363948, 106387066|LOC106387066, 106367364|LOC106367364
bna00592	Metabolism	Lipid metabolism	alpha-Linolenic acid metabolism	3.11255	0.000771695	106453030|LOC106453030, 106401486|LOC106401486, 106376739|LOC106376739, 106392161|LOC106392161, 106348746|LOC106348746, 106377834|LOC106377834, 106406326|LOC106406326, 106353868|LOC106353868, 106410673|LOC106410673, 106377835|LOC106377835, 106403712|LOC106403712, 106355888|LOC106355888, 106380862|LOC106380862, 106349686|LOC106349686, 106377836|LOC106377836, 106387698|LOC106387698
bna00920	Metabolism	Energy metabolism	Sulfur metabolism	2.63958	0.00229308	106396443|LOC106396443, 106345635|LOC106345635, 106418329|LOC106418329, 106418321|LOC106418321, 106410303|LOC106410303, 106440433|LOC106440433, 106366895|LOC106366895, 106451483|LOC106451483, 106441908|LOC106441908, 106443239|LOC106443239, 106417713|LOC106417713, 106412042|LOC106412042, 106346634|LOC106346634, 106402810|LOC106402810, 106442702|LOC106442702
bna04070	Environmental Information Processing	Signal transduction	Phosphatidylinositol signaling system	2.38524	0.00411874	106407133|LOC106407133, 106453198|LOC106453198, 106406020|LOC106406020, 106348123|LOC106348123, 106383367|LOC106383367, 106399811|LOC106399811, 106368843|LOC106368843, 106445366|LOC106445366, 106394984|LOC106394984, 106445409|LOC106445409, 106352780|LOC106352780, 106446077|LOC106446077, 106450263|LOC106450263, 106438004|LOC106438004, 106387397|LOC106387397, 106382911|LOC106382911, 106387192|LOC10…
bna00561	Metabolism	Lipid metabolism	Glycerolipid metabolism	2.33355	0.00463926	106400574|LOC106400574, 106438654|LOC106438654, 106441883|LOC106441883, 106388796|LOC106388796, 106388797|LOC106388797, 106383367|LOC106383367, 106368843|LOC106368843, 106397630|LOC106397630, 106452997|LOC106452997, 106445409|LOC106445409, 106349443|LOC106349443, 106376661|LOC106376661, 106382911|LOC106382911, 106352869|LOC106352869, 106387192|LOC106387192, 106376343|LOC106376343, 106376658|LOC10…
bna00520	Metabolism	Carbohydrate metabolism	Amino sugar and nucleotide sugar metabolism	2.29861	0.00502793	106349210|LOC106349210, 106375449|LOC106375449, 106392805|LOC106392805, 106450964|LOC106450964, 106415626|LOC106415626, 106375581|LOC106375581, 106387746|LOC106387746, 106352208|LOC106352208, 106359921|LOC106359921, 106367717|LOC106367717, 106372159|LOC106372159, 106447109|LOC106447109, 106349206|LOC106349206, 106410748|LOC106410748, 106380457|LOC106380457, 106377637|LOC106377637, 106406721|LOC10…
bna00062	Metabolism	Lipid metabolism	Fatty acid elongation	1.474	0.0335734	106390743|LOC106390743, 106393913|LOC106393913, 106384895|LOC106384895, 106405914|LOC106405914, 106393937|LOC106393937, 106400927|LOC106400927, 106409944|LOC106409944, 106415382|LOC106415382, 106441129|LOC106441129, 106353119|LOC106353119
bna00270	Metabolism	Amino acid metabolism	Cysteine and methionine metabolism	1.42328	0.037733	106445177|LOC106445177, 106384874|LOC106384874, 106350872|LOC106350872, 106385546|LOC106385546, 106385536|LOC106385536, 106396443|LOC106396443, 106438934|LOC106438934, 106401189|LOC106401189, 106345635|LOC106345635, 106414306|LOC106414306, 106390423|LOC106390423, 106401155|LOC106401155, 106362401|LOC106362401, 106440395|LOC106440395, 106438967|LOC106438967, 106444821|LOC106444821, 106351310|LOC10…
bna01212	Metabolism	Global and overview maps	Fatty acid metabolism	1.40999	0.0389052	106366808|LOC106366808, 106400945|LOC106400945, 106381762|LOC106381762, 106348748|LOC106348748, 106401486|LOC106401486, 106445302|LOC106445302, 106348746|LOC106348746, 106397390|LOC106397390, 106349686|LOC106349686, 106445421|LOC106445421, 106384895|LOC106384895, 106349745|LOC106349745, 106381763|LOC106381763, 106405914|LOC106405914, 106408924|LOC106408924, 106406010|LOC106406010, 106353119|LOC10…
bna00360	Metabolism	Amino acid metabolism	Phenylalanine metabolism	1.40381	0.0394628	106384874|LOC106384874, 106398793|LOC106398793, 106397772|LOC106397772, 106453756|LOC106453756, 106439660|LOC106439660, 106371449|LOC106371449, 106391500|LOC106391500, 106451642|LOC106451642, 106444515|LOC106444515, 106437590|LOC106437590, 106439680|LOC106439680, 106439681|LOC106439681, 106384062|LOC106384062
bna00130	Metabolism	Metabolism of cofactors and vitamins	Ubiquinone and other terpenoid-quinone biosynthesis	1.39185	0.0405646	106384874|LOC106384874, 106397772|LOC106397772, 106453756|LOC106453756, 106439660|LOC106439660, 106446194|LOC106446194, 106451642|LOC106451642, 106388005|LOC106388005, 106444515|LOC106444515, 106397335|LOC106397335, 106355795|LOC106355795, 106437590|LOC106437590
bna00904	Metabolism	Metabolism of terpenoids and polyketides	Diterpenoid biosynthesis	1.2541	0.0557054	106398038|LOC106398038, 106401876|LOC106401876, 106404899|LOC106404899, 106370917|LOC106370917, 106357377|LOC106357377, 106422838|LOC106422838, 106354788|LOC106354788, 106446088|LOC106446088
bna00965	Metabolism	Biosynthesis of other secondary metabolites	Betalain biosynthesis	1.18329	0.0655701	106406724|LOC106406724, 106402706|LOC106402706
bna00564	Metabolism	Lipid metabolism	Glycerophospholipid metabolism	1.10961	0.0776939	106438654|LOC106438654, 106441883|LOC106441883, 106354162|LOC106354162, 106388796|LOC106388796, 106367016|LOC106367016, 106388797|LOC106388797, 106383367|LOC106383367, 106368843|LOC106368843, 106397630|LOC106397630, 106445409|LOC106445409, 106349443|LOC106349443, 106434540|LOC106434540, 106348466|LOC106348466, 106381084|LOC106381084, 106382911|LOC106382911, 106387192|LOC106387192, 106406327|LOC10…
bna01053	Metabolism	Metabolism of terpenoids and polyketides	Biosynthesis of siderophore group nonribosomal peptides	1.02638	0.0941075	106446194|LOC106446194, 106355795|LOC106355795
bna00410	Metabolism	Metabolism of other amino acids	beta-Alanine metabolism	0.936226	0.115818	106400945|LOC106400945, 106348748|LOC106348748, 106376343|LOC106376343, 106442862|LOC106442862, 106366710|LOC106366710, 106386315|LOC106386315, 106439680|LOC106439680, 106439681|LOC106439681, 106387720|LOC106387720, 106431049|LOC106431049
bna00250	Metabolism	Amino acid metabolism	Alanine, aspartate and glutamate metabolism	0.88602	0.130011	106438380|LOC106438380, 106397664|LOC106397664, 106390423|LOC106390423, 106446075|LOC106446075, 106354452|LOC106354452, 106354451|LOC106354451, 106407082|LOC106407082, 106366710|LOC106366710, 106386315|LOC106386315, 106438152|LOC106438152, 106410980|LOC106410980, 106387720|LOC106387720, 106402454|LOC106402454
bna00254	Metabolism	Biosynthesis of other secondary metabolites	Aflatoxin biosynthesis	0.864854	0.136504	106349745|LOC106349745
bna00524	Metabolism	Biosynthesis of other secondary metabolites	Neomycin, kanamycin and gentamicin biosynthesis	0.847954	0.141921	106447109|LOC106447109, 106406721|LOC106406721
bna00780	Metabolism	Metabolism of cofactors and vitamins	Biotin metabolism	0.741069	0.181523	106381762|LOC106381762, 106445302|LOC106445302, 106381763|LOC106381763, 106408924|LOC106408924, 106406010|LOC106406010
bna00450	Metabolism	Metabolism of other amino acids	Selenocompound metabolism	0.741069	0.181523	106356040|LOC106356040, 106355063|LOC106355063, 106410303|LOC106410303, 106438967|LOC106438967, 106447616|LOC106447616
bna03410	Genetic Information Processing	Replication and repair	Base excision repair	0.721185	0.190027	106357489|LOC106357489, 106401750|LOC106401750, 106381619|LOC106381619, 106368390|LOC106368390, 106387266|LOC106387266, 106452373|LOC106452373, 106405613|LOC106405613, 106451653|LOC106451653
bna00966	Metabolism	Biosynthesis of other secondary metabolites	Glucosinolate biosynthesis	0.709989	0.194989	106381227|LOC106381227, 106415773|LOC106415773, 106377269|LOC106377269
bna00590	Metabolism	Lipid metabolism	Arachidonic acid metabolism	0.632958	0.232832	106451402|LOC106451402, 106380476|LOC106380476, 106451401|LOC106451401, 106445991|LOC106445991, 106396928|LOC106396928
bna00940	Metabolism	Biosynthesis of other secondary metabolites	Phenylpropanoid biosynthesis	0.6149	0.242717	106387147|LOC106387147, 106398793|LOC106398793, 106397772|LOC106397772, 106375482|LOC106375482, 106381558|LOC106381558, 106453756|LOC106453756, 106387189|LOC106387189, 106407084|LOC106407084, 106412061|LOC106412061, 106347962|LOC106347962, 106439660|LOC106439660, 106371449|LOC106371449, 106369846|LOC106369846, 106391500|LOC106391500, 106440671|LOC106440671, 106394722|LOC106394722, 106451642|LOC10…
bna00960	Metabolism	Biosynthesis of other secondary metabolites	Tropane, piperidine and pyridine alkaloid biosynthesis	0.606457	0.247482	106384874|LOC106384874, 106447281|LOC106447281, 106447279|LOC106447279, 106444515|LOC106444515, 106446957|LOC106446957, 106439680|LOC106439680, 106439681|LOC106439681, 106368966|LOC106368966
bna00061	Metabolism	Lipid metabolism	Fatty acid biosynthesis	0.569543	0.269437	106366808|LOC106366808, 106381762|LOC106381762, 106445302|LOC106445302, 106397390|LOC106397390, 106445421|LOC106445421, 106349745|LOC106349745, 106381763|LOC106381763, 106408924|LOC106408924, 106406010|LOC106406010
bna00071	Metabolism	Lipid metabolism	Fatty acid degradation	0.519102	0.30262	106400945|LOC106400945, 106348748|LOC106348748, 106401486|LOC106401486, 106392161|LOC106392161, 106348746|LOC106348746, 106397390|LOC106397390, 106376343|LOC106376343, 106349686|LOC106349686
bna00908	Metabolism	Metabolism of terpenoids and polyketides	Zeatin biosynthesis	0.464074	0.343499	106374136|LOC106374136, 106365552|LOC106365552, 106384861|LOC106384861, 106415860|LOC106415860
bna00280	Metabolism	Amino acid metabolism	Valine, leucine and isoleucine degradation	0.443533	0.360137	106400945|LOC106400945, 106348748|LOC106348748, 106390423|LOC106390423, 106376343|LOC106376343, 106362401|LOC106362401, 106442862|LOC106442862, 106438152|LOC106438152, 106410980|LOC106410980
bna00510	Metabolism	Glycan biosynthesis and metabolism	N-Glycan biosynthesis	0.432699	0.369234	106382365|LOC106382365, 106451304|LOC106451304, 106378797|LOC106378797, 106451303|LOC106451303, 106386751|LOC106386751, 106362059|LOC106362059, 106416465|LOC106416465, 106402781|LOC106402781, 106406391|LOC106406391
bna00500	Metabolism	Carbohydrate metabolism	Starch and sucrose metabolism	0.409099	0.389853	106387147|LOC106387147, 106382178|LOC106382178, 106447109|LOC106447109, 106369186|LOC106369186, 106348467|LOC106348467, 106382885|LOC106382885, 106443074|LOC106443074, 106406721|LOC106406721, 106412061|LOC106412061, 106447959|LOC106447959, 106407297|LOC106407297, 106385154|LOC106385154, 106387293|LOC106387293, 106346734|LOC106346734, 106407384|LOC106407384, 106358316|LOC106358316, 106409713|LOC10…
bna00910	Metabolism	Energy metabolism	Nitrogen metabolism	0.401574	0.396667	106438380|LOC106438380, 106406486|LOC106406486, 106418601|LOC106418601, 106446075|LOC106446075, 106354452|LOC106354452, 106354451|LOC106354451, 106354597|LOC106354597, 106402454|LOC106402454
bna00750	Metabolism	Metabolism of cofactors and vitamins	Vitamin B6 metabolism	0.393941	0.403701	106351387|LOC106351387, 106381286|LOC106381286, 106381279|LOC106381279
bna00945	Metabolism	Biosynthesis of other secondary metabolites	Stilbenoid, diarylheptanoid and gingerol biosynthesis	0.380223	0.416655	106387189|LOC106387189, 106437590|LOC106437590, 106446740|LOC106446740
bna00333	Metabolism	Biosynthesis of other secondary metabolites	Prodigiosin biosynthesis	0.373683	0.422977	106445302|LOC106445302, 106408924|LOC106408924
bna00950	Metabolism	Biosynthesis of other secondary metabolites	Isoquinoline alkaloid biosynthesis	0.365654	0.43087	106384874|LOC106384874, 106444515|LOC106444515, 106439680|LOC106439680, 106439681|LOC106439681
bna04141	Genetic Information Processing	Folding, sorting and degradation	Protein processing in endoplasmic reticulum	0.344749	0.452117	106451757|LOC106451757, 106368214|LOC106368214, 106380873|LOC106380873, 106397237|LOC106397237, 106397623|LOC106397623, 106386751|LOC106386751, 106401239|LOC106401239, 106451283|LOC106451283, 106443219|LOC106443219, 106351544|LOC106351544, 106360686|LOC106360686, 106451531|LOC106451531, 106353095|LOC106353095, 106451511|LOC106451511, 106367426|LOC106367426, 106451510|LOC106451510, 106371215|LOC10…
bna00220	Metabolism	Amino acid metabolism	Arginine biosynthesis	0.33087	0.466799	106438380|LOC106438380, 106350679|LOC106350679, 106446075|LOC106446075, 106354452|LOC106354452, 106354451|LOC106354451, 106451035|LOC106451035, 106402454|LOC106402454
bna00600	Metabolism	Lipid metabolism	Sphingolipid metabolism	0.315195	0.483955	106400578|LOC106400578, 106415772|LOC106415772, 106360138|LOC106360138, 106380528|LOC106380528
bna04144	Cellular Processes	Transport and catabolism	Endocytosis	0.304208	0.496355	106381276|LOC106381276, 106376200|LOC106376200, 106367016|LOC106367016, 106401239|LOC106401239, 106361087|LOC106361087, 106451671|LOC106451671, 106351544|LOC106351544, 106360686|LOC106360686, 106348962|LOC106348962, 106389879|LOC106389879, 106348466|LOC106348466, 106353095|LOC106353095, 106345785|LOC106345785, 106451548|LOC106451548, 106396610|LOC106396610, 106382762|LOC106382762, 106406688|LOC10…
bna00053	Metabolism	Carbohydrate metabolism	Ascorbate and aldarate metabolism	0.302533	0.498272	106453198|LOC106453198, 106372159|LOC106372159, 106452428|LOC106452428, 106376343|LOC106376343, 106354606|LOC106354606, 106368218|LOC106368218, 106447112|LOC106447112, 106386647|LOC106386647
bna00230	Metabolism	Nucleotide metabolism	Purine metabolism	0.294752	0.50728	106418130|LOC106418130, 106403511|LOC106403511, 106357489|LOC106357489, 106391959|LOC106391959, 106368204|LOC106368204, 106366870|LOC106366870, 106451887|LOC106451887, 106382824|LOC106382824, 106401750|LOC106401750, 106407214|LOC106407214, 106396846|LOC106396846, 106410303|LOC106410303, 106397137|LOC106397137, 106413317|LOC106413317, 106386893|LOC106386893, 106443239|LOC106443239, 106407082|LOC10…
bna04933	Human Diseases	Endocrine and metabolic disease	AGE-RAGE signaling pathway in diabetic complications	0.288326	0.514842	106450263|LOC106450263, 106387397|LOC106387397, 106389484|LOC106389484, 106345783|LOC106345783
bna03040	Genetic Information Processing	Transcription	Spliceosome	0.278601	0.526501	106453020|LOC106453020, 106346061|LOC106346061, 106382107|LOC106382107, 106406593|LOC106406593, 106387277|LOC106387277, 106401239|LOC106401239, 106366802|LOC106366802, 106389571|LOC106389571, 106351544|LOC106351544, 106388151|LOC106388151, 106453449|LOC106453449, 106360686|LOC106360686, 106452478|LOC106452478, 106383346|LOC106383346, 106410625|LOC106410625, 106366115|LOC106366115, 106353095|LOC10…
bna00430	Metabolism	Metabolism of other amino acids	Taurine and hypotaurine metabolism	0.277387	0.527974	106366710|LOC106366710, 106386315|LOC106386315, 106387720|LOC106387720
bna00514	Metabolism	Glycan biosynthesis and metabolism	Other types of O-glycan biosynthesis	0.273255	0.533022	106365673|LOC106365673, 106367650|LOC106367650
bna00260	Metabolism	Amino acid metabolism	Glycine, serine and threonine metabolism	0.26753	0.540095	106380661|LOC106380661, 106376661|LOC106376661, 106402942|LOC106402942, 106390423|LOC106390423, 106415509|LOC106415509, 106376658|LOC106376658, 106381286|LOC106381286, 106399829|LOC106399829, 106438152|LOC106438152, 106439680|LOC106439680, 106410980|LOC106410980, 106439681|LOC106439681
bna00380	Metabolism	Amino acid metabolism	Tryptophan metabolism	0.259596	0.550052	106381227|LOC106381227, 106415773|LOC106415773, 106376343|LOC106376343, 106365896|LOC106365896, 106440374|LOC106440374, 106348545|LOC106348545, 106442204|LOC106442204
bna00052	Metabolism	Carbohydrate metabolism	Galactose metabolism	0.256396	0.55412	106418461|LOC106418461, 106447109|LOC106447109, 106348467|LOC106348467, 106406721|LOC106406721, 106447959|LOC106447959, 106387293|LOC106387293, 106418226|LOC106418226, 106380528|LOC106380528
bna04130	Genetic Information Processing	Folding, sorting and degradation	SNARE interactions in vesicular transport	0.232085	0.586024	106416182|LOC106416182, 106445151|LOC106445151, 106390699|LOC106390699, 106349368|LOC106349368, 106353064|LOC106353064, 106402296|LOC106402296, 106452501|LOC106452501
bna00640	Metabolism	Carbohydrate metabolism	Propanoate metabolism	0.227226	0.592617	106400945|LOC106400945, 106348748|LOC106348748, 106442862|LOC106442862, 106349745|LOC106349745
bna00565	Metabolism	Lipid metabolism	Ether lipid metabolism	0.227226	0.592617	106367016|LOC106367016, 106348466|LOC106348466, 106406327|LOC106406327, 106453259|LOC106453259
bna00562	Metabolism	Carbohydrate metabolism	Inositol phosphate metabolism	0.219684	0.602998	106453198|LOC106453198, 106348123|LOC106348123, 106445366|LOC106445366, 106394984|LOC106394984, 106446077|LOC106446077, 106450263|LOC106450263, 106387397|LOC106387397, 106382926|LOC106382926, 106412019|LOC106412019, 106447112|LOC106447112
bna01040	Metabolism	Lipid metabolism	Biosynthesis of unsaturated fatty acids	0.214048	0.610874	106366808|LOC106366808, 106445302|LOC106445302, 106384895|LOC106384895, 106405914|LOC106405914
bna00650	Metabolism	Carbohydrate metabolism	Butanoate metabolism	0.203107	0.626459	106366710|LOC106366710, 106386315|LOC106386315, 106387720|LOC106387720
bna00941	Metabolism	Biosynthesis of other secondary metabolites	Flavonoid biosynthesis	0.201613	0.628619	106382906|LOC106382906, 106387189|LOC106387189, 106437590|LOC106437590, 106446740|LOC106446740
bna00531	Metabolism	Glycan biosynthesis and metabolism	Glycosaminoglycan degradation	0.19229	0.642259	106371822|LOC106371822
bna00051	Metabolism	Carbohydrate metabolism	Fructose and mannose metabolism	0.162473	0.687902	106359921|LOC106359921, 106367717|LOC106367717, 106447109|LOC106447109, 106406721|LOC106406721, 106441093|LOC106441093, 106366807|LOC106366807, 106387286|LOC106387286, 106418226|LOC106418226, 106404813|LOC106404813
bna00010	Metabolism	Carbohydrate metabolism	Glycolysis / Gluconeogenesis	0.156503	0.697424	106365675|LOC106365675, 106402470|LOC106402470, 106392161|LOC106392161, 106447109|LOC106447109, 106438973|LOC106438973, 106396486|LOC106396486, 106451887|LOC106451887, 106406721|LOC106406721, 106402942|LOC106402942, 106376343|LOC106376343, 106452368|LOC106452368, 106414225|LOC106414225, 106418226|LOC106418226, 106348189|LOC106348189, 106353277|LOC106353277, 106406490|LOC106406490, 106382909|LOC10…
bna00790	Metabolism	Metabolism of cofactors and vitamins	Folate biosynthesis	0.154066	0.701349	106411792|LOC106411792, 106348065|LOC106348065, 106345503|LOC106345503
bna00903	Metabolism	Metabolism of terpenoids and polyketides	Limonene and pinene degradation	0.151245	0.705919	106376343|LOC106376343
bna00860	Metabolism	Metabolism of cofactors and vitamins	Porphyrin and chlorophyll metabolism	0.14934	0.709022	106348754|LOC106348754, 106350863|LOC106350863, 106368562|LOC106368562, 106380526|LOC106380526, 106398887|LOC106398887, 106440765|LOC106440765
bna00350	Metabolism	Amino acid metabolism	Tyrosine metabolism	0.139899	0.724605	106384874|LOC106384874, 106392161|LOC106392161, 106444515|LOC106444515, 106439680|LOC106439680, 106439681|LOC106439681
bna00603	Metabolism	Glycan biosynthesis and metabolism	Glycosphingolipid biosynthesis - globo and isoglobo series	0.134677	0.73337	106380528|LOC106380528
bna03008	Genetic Information Processing	Translation	Ribosome biogenesis in eukaryotes	0.128347	0.744137	106451761|LOC106451761, 106445315|LOC106445315, 106366115|LOC106366115, 106372422|LOC106372422, 106361337|LOC106361337, 106386550|LOC106386550, 106416440|LOC106416440, 106383775|LOC106383775, 106405446|LOC106405446, 106353240|LOC106353240, 106380416|LOC106380416, 106397666|LOC106397666, 106348654|LOC106348654
bna00400	Metabolism	Amino acid metabolism	Phenylalanine, tyrosine and tryptophan biosynthesis	0.121087	0.756681	106384874|LOC106384874, 106347647|LOC106347647, 106389628|LOC106389628, 106397587|LOC106397587, 106444515|LOC106444515, 106399829|LOC106399829, 106438690|LOC106438690
bna00563	Metabolism	Glycan biosynthesis and metabolism	Glycosylphosphatidylinositol (GPI)-anchor biosynthesis	0.108048	0.779744	106370718|LOC106370718, 106372585|LOC106372585
bna04136	Cellular Processes	Transport and catabolism	Autophagy - other	0.105957	0.783506	106352066|LOC106352066, 106346196|LOC106346196, 106404501|LOC106404501, 106346195|LOC106346195, 106401002|LOC106401002
bna00760	Metabolism	Metabolism of cofactors and vitamins	Nicotinate and nicotinamide metabolism	0.0843765	0.823424	106390659|LOC106390659, 106354690|LOC106354690
bna00440	Metabolism	Metabolism of other amino acids	Phosphonate and phosphinate metabolism	0.0817206	0.828475	106453259|LOC106453259
bna00340	Metabolism	Amino acid metabolism	Histidine metabolism	0.0777116	0.836158	106362508|LOC106362508, 106376343|LOC106376343
bna00261	Metabolism	Biosynthesis of other secondary metabolites	Monobactam biosynthesis	0.0695919	0.851938	106410303|LOC106410303
bna00100	Metabolism	Lipid metabolism	Steroid biosynthesis	0.0666872	0.857655	106366810|LOC106366810, 106387284|LOC106387284, 106395025|LOC106395025, 106384356|LOC106384356
bna03060	Genetic Information Processing	Folding, sorting and degradation	Protein export	0.0664804	0.858064	106371215|LOC106371215, 106347521|LOC106347521, 106402543|LOC106402543, 106366724|LOC106366724, 106380189|LOC106380189, 106402004|LOC106402004
bna00905	Metabolism	Metabolism of terpenoids and polyketides	Brassinosteroid biosynthesis	0.062597	0.865771	106349108|LOC106349108
bna00480	Metabolism	Metabolism of other amino acids	Glutathione metabolism	0.0622011	0.866561	106349212|LOC106349212, 106451402|LOC106451402, 106380476|LOC106380476, 106451401|LOC106451401, 106352176|LOC106352176, 106445991|LOC106445991, 106354606|LOC106354606, 106354403|LOC106354403, 106396928|LOC106396928, 106382554|LOC106382554, 106386647|LOC106386647, 106382555|LOC106382555
bna00511	Metabolism	Glycan biosynthesis and metabolism	Other glycan degradation	0.0593862	0.872195	106415772|LOC106415772
bna02010	Environmental Information Processing	Membrane transport	ABC transporters	0.0536686	0.883754	106353812|LOC106353812, 106353309|LOC106353309
bna00901	Metabolism	Biosynthesis of other secondary metabolites	Indole alkaloid biosynthesis	0.0534801	0.884138	106361670|LOC106361670
bna00073	Metabolism	Lipid metabolism	Cutin, suberine and wax biosynthesis	0.052004	0.887148	106371648|LOC106371648, 106438558|LOC106438558, 106391051|LOC106391051
bna00900	Metabolism	Metabolism of terpenoids and polyketides	Terpenoid backbone biosynthesis	0.0471495	0.89712	106384672|LOC106384672, 106361432|LOC106361432, 106435924|LOC106435924, 106380115|LOC106380115, 106397624|LOC106397624
bna03010	Genetic Information Processing	Translation	Ribosome	0.0465224	0.898416	106376336|LOC106376336, 106433369|LOC106433369, 106365667|LOC106365667, 106451134|LOC106451134, 106365674|LOC106365674, 106372613|LOC106372613, 106366833|LOC106366833, 106433407|LOC106433407, 106400541|LOC106400541, 106400542|LOC106400542, 106390601|LOC106390601, 106449191|LOC106449191, 106397170|LOC106397170, 106363404|LOC106363404, 106366814|LOC106366814, 106400581|LOC106400581, 106362022|LOC10…
bna00040	Metabolism	Carbohydrate metabolism	Pentose and glucuronate interconversions	0.0434882	0.904715	106372159|LOC106372159, 106387293|LOC106387293, 106410328|LOC106410328, 106365512|LOC106365512, 106379851|LOC106379851, 106359593|LOC106359593, 106368660|LOC106368660, 106375499|LOC106375499, 106345454|LOC106345454, 106368218|LOC106368218, 106362606|LOC106362606, 106394864|LOC106394864
bna00740	Metabolism	Metabolism of cofactors and vitamins	Riboflavin metabolism	0.0303669	0.932466	106348065|LOC106348065
bna00240	Metabolism	Nucleotide metabolism	Pyrimidine metabolism	0.0294184	0.934505	106418130|LOC106418130, 106401596|LOC106401596, 106357489|LOC106357489, 106391959|LOC106391959, 106390659|LOC106390659, 106397664|LOC106397664, 106401750|LOC106401750, 106386893|LOC106386893, 106382537|LOC106382537, 106451653|LOC106451653, 106441209|LOC106441209, 106391989|LOC106391989, 106431657|LOC106431657
bna03050	Genetic Information Processing	Folding, sorting and degradation	Proteasome	0.0227206	0.949029	106451769|LOC106451769, 106451289|LOC106451289, 106348206|LOC106348206, 106362024|LOC106362024, 106401780|LOC106401780, 106354769|LOC106354769
bna00620	Metabolism	Carbohydrate metabolism	Pyruvate metabolism	0.021254	0.952239	106396486|LOC106396486, 106451887|LOC106451887, 106376343|LOC106376343, 106440395|LOC106440395, 106348189|LOC106348189, 106349745|LOC106349745, 106437749|LOC106437749, 106382909|LOC106382909
bna03018	Genetic Information Processing	Folding, sorting and degradation	RNA degradation	0.0203151	0.9543	106347687|LOC106347687, 106438373|LOC106438373, 106384754|LOC106384754, 106371662|LOC106371662, 106418130|LOC106418130, 106380532|LOC106380532, 106451758|LOC106451758, 106375106|LOC106375106, 106418226|LOC106418226, 106401423|LOC106401423, 106401928|LOC106401928, 106431657|LOC106431657
bna01230	Metabolism	Global and overview maps	Biosynthesis of amino acids	0.0183851	0.95855	106365675|LOC106365675, 106384874|LOC106384874, 106347647|LOC106347647, 106389628|LOC106389628, 106432962|LOC106432962, 106396443|LOC106396443, 106380661|LOC106380661, 106438973|LOC106438973, 106350679|LOC106350679, 106451887|LOC106451887, 106345635|LOC106345635, 106362508|LOC106362508, 106397587|LOC106397587, 106402942|LOC106402942, 106415509|LOC106415509, 106452368|LOC106452368, 106362401|LOC10…
bna00710	Metabolism	Energy metabolism	Carbon fixation in photosynthetic organisms	0.0178758	0.959675	106365675|LOC106365675, 106432962|LOC106432962, 106438973|LOC106438973, 106452368|LOC106452368, 106440395|LOC106440395, 106348189|LOC106348189, 106406490|LOC106406490
bna00670	Metabolism	Metabolism of cofactors and vitamins	One carbon pool by folate	0.0165826	0.962537	106415509|LOC106415509
bna00730	Metabolism	Metabolism of cofactors and vitamins	Thiamine metabolism	0.0165826	0.962537	106366413|LOC106366413
bna00030	Metabolism	Carbohydrate metabolism	Pentose phosphate pathway	0.015594	0.96473	106349212|LOC106349212, 106432962|LOC106432962, 106418226|LOC106418226, 106352176|LOC106352176
bna00460	Metabolism	Metabolism of other amino acids	Cyanoamino acid metabolism	0.0145094	0.967143	106387147|LOC106387147, 106412061|LOC106412061, 106415509|LOC106415509, 106371702|LOC106371702, 106387146|LOC106387146
bna00020	Metabolism	Carbohydrate metabolism	Citrate cycle (TCA cycle)	0.0131691	0.970132	106396486|LOC106396486, 106382939|LOC106382939, 106378878|LOC106378878, 106440395|LOC106440395, 106348189|LOC106348189
bna03420	Genetic Information Processing	Replication and repair	Nucleotide excision repair	0.0115012	0.973865	106371057|LOC106371057, 106451439|LOC106451439, 106357489|LOC106357489, 106453031|LOC106453031, 106401750|LOC106401750, 106453235|LOC106453235, 106410763|LOC106410763, 106385500|LOC106385500, 106451653|LOC106451653
bna00196	Metabolism	Energy metabolism	Photosynthesis - antenna proteins	0.0105829	0.975926	106401741|LOC106401741
bna04120	Genetic Information Processing	Folding, sorting and degradation	Ubiquitin mediated proteolysis	0.00886617	0.979792	106368214|LOC106368214, 106348419|LOC106348419, 106403778|LOC106403778, 106402927|LOC106402927, 106379602|LOC106379602, 106402476|LOC106402476, 106451281|LOC106451281, 106385500|LOC106385500, 106354675|LOC106354675, 106384850|LOC106384850, 106440578|LOC106440578, 106415585|LOC106415585, 106397859|LOC106397859
bna01200	Metabolism	Global and overview maps	Carbon metabolism	0.00833828	0.980984	106349212|LOC106349212, 106365675|LOC106365675, 106400945|LOC106400945, 106438380|LOC106438380, 106380594|LOC106380594, 106348748|LOC106348748, 106432962|LOC106432962, 106396443|LOC106396443, 106447109|LOC106447109, 106380661|LOC106380661, 106438973|LOC106438973, 106376661|LOC106376661, 106396486|LOC106396486, 106451887|LOC106451887, 106406721|LOC106406721, 106345635|LOC106345635, 106382939|LOC10…
bna01210	Metabolism	Global and overview maps	2-Oxocarboxylic acid metabolism	0.00805201	0.98163	106350679|LOC106350679, 106381227|LOC106381227, 106415773|LOC106415773, 106362401|LOC106362401, 106451035|LOC106451035, 106377269|LOC106377269
bna00630	Metabolism	Carbohydrate metabolism	Glyoxylate and dicarboxylate metabolism	0.00787152	0.982038	106380594|LOC106380594, 106376661|LOC106376661, 106415509|LOC106415509, 106376658|LOC106376658, 106440395|LOC106440395, 106354452|LOC106354452, 106354451|LOC106354451
bna00290	Metabolism	Amino acid metabolism	Valine, leucine and isoleucine biosynthesis	0.00785491	0.982076	106362401|LOC106362401
bna03440	Genetic Information Processing	Replication and repair	Homologous recombination	0.00779596	0.982209	106371057|LOC106371057, 106397655|LOC106397655, 106451439|LOC106451439, 106357489|LOC106357489, 106401750|LOC106401750, 106451653|LOC106451653, 106376587|LOC106376587, 106383343|LOC106383343
bna00330	Metabolism	Amino acid metabolism	Arginine and proline metabolism	0.00774617	0.982322	106350872|LOC106350872, 106438934|LOC106438934, 106376343|LOC106376343, 106431049|LOC106431049
bna03030	Genetic Information Processing	Replication and repair	DNA replication	0.00388091	0.991104	106371057|LOC106371057, 106451439|LOC106451439, 106357489|LOC106357489, 106401750|LOC106401750, 106410763|LOC106410763, 106451653|LOC106451653, 106391989|LOC106391989
bna00770	Metabolism	Metabolism of cofactors and vitamins	Pantothenate and CoA biosynthesis	0.00277883	0.993622	106362401|LOC106362401
bna03020	Genetic Information Processing	Transcription	RNA polymerase	0.00256507	0.994111	106391959|LOC106391959, 106386893|LOC106386893
bna03430	Genetic Information Processing	Replication and repair	Mismatch repair	0.00242414	0.994434	106371057|LOC106371057, 106451439|LOC106451439, 106401750|LOC106401750, 106410763|LOC106410763, 106357980|LOC106357980
bna04712	Organismal Systems	Environmental adaptation	Circadian rhythm - plant	0.00196671	0.995482	106396525|LOC106396525
bna00310	Metabolism	Amino acid metabolism	Lysine degradation	0.00187198	0.995699	106376343|LOC106376343
bna03013	Genetic Information Processing	Translation	Nucleocytoplasmic transport	0.0014788	0.996601	106433858|LOC106433858, 106433386|LOC106433386, 106389825|LOC106389825, 106441212|LOC106441212, 106346004|LOC106346004, 106349121|LOC106349121, 106347315|LOC106347315, 106371230|LOC106371230, 106454810|LOC106454810, 106383775|LOC106383775, 106348282|LOC106348282, 106414339|LOC106414339, 106396211|LOC106396211, 106451264|LOC106451264, 106406620|LOC106406620
bna00970	Genetic Information Processing	Translation	Aminoacyl-tRNA biosynthesis	0.0013219	0.996961	106365663|LOC106365663, 106365664|LOC106365664, 106387290|LOC106387290, 106446377|LOC106446377
bna03015	Genetic Information Processing	Translation	mRNA surveillance pathway	0.0006774	0.998441	106353885|LOC106353885, 106402123|LOC106402123, 106362019|LOC106362019, 106350005|LOC106350005, 106346196|LOC106346196, 106380886|LOC106380886, 106351539|LOC106351539, 106346195|LOC106346195, 106406623|LOC106406623
bna04146	Cellular Processes	Transport and catabolism	Peroxisome	0.00063803	0.998532	106380594|LOC106380594, 106397390|LOC106397390, 106371648|LOC106371648, 106452364|LOC106452364, 106438558|LOC106438558
bna04145	Cellular Processes	Transport and catabolism	Phagosome	0.00059944	0.998621	106401734|LOC106401734, 106445366|LOC106445366, 106394984|LOC106394984, 106454754|LOC106454754, 106371215|LOC106371215, 106389484|LOC106389484, 106345783|LOC106345783
bna03022	Genetic Information Processing	Transcription	Basal transcription factors	0.000247284	0.999431	106364104|LOC106364104
bna00190	Metabolism	Energy metabolism	Oxidative phosphorylation	0.000178557	0.999589	106406037|LOC106406037, 106401734|LOC106401734, 106406597|LOC106406597, 106449323|LOC106449323, 106454754|LOC106454754, 106382939|LOC106382939, 106398887|LOC106398887, 106397393|LOC106397393, 106438704|LOC106438704, 106405387|LOC106405387, 106418335|LOC106418335, 106354655|LOC106354655
bna00195	Metabolism	Energy metabolism	Photosynthesis	6.91193e-05	0.999841	106415703|LOC106415703, 106380499|LOC106380499

## Sheet: MT VS ST 25
Supplemental Data 3. KEGG analysis of DEGs between MS mutant and WT at different DAG.
ST: Time after germination of single-stem plants (WT), MT: Time after germination of multi-stems (MS) mutants.
TOP10 KEGG pathways were marked out.
Pathway_ID	KEGG_Level_1	KEGG_Level_2	Pathway_Name	neglog10P	P.value	IDs
bna00360	Metabolism	Amino acid metabolism	Phenylalanine metabolism	6.49876	3.17128e-07	106397772|LOC106397772, 106437590|LOC106437590, 106451642|LOC106451642, 106398793|LOC106398793, 106453756|LOC106453756, 106388514|LOC106388514, 106388513|LOC106388513, 106391500|LOC106391500, 106387868|LOC106387868, 106371447|LOC106371447, 106371451|LOC106371451, 106371449|LOC106371449, 106348399|LOC106348399, 106382579|LOC106382579, 106389127|LOC106389127, 106384874|LOC106384874, 106452446|LOC10…
bna00500	Metabolism	Carbohydrate metabolism	Starch and sucrose metabolism	5.9898	1.02377e-06	106354691|LOC106354691, 106349507|LOC106349507, 106365510|LOC106365510, 106387147|LOC106387147, 106382178|LOC106382178, 106447959|LOC106447959, 106400683|LOC106400683, 106354279|LOC106354279, 106400684|LOC106400684, 106407297|LOC106407297, 106387146|LOC106387146, 106410767|LOC106410767, 106353704|LOC106353704, 106396851|LOC106396851, 106354550|LOC106354550, 106352732|LOC106352732, 106347999|LOC10…
bna00592	Metabolism	Lipid metabolism	alpha-Linolenic acid metabolism	5.55074	2.81358e-06	106349686|LOC106349686, 106377835|LOC106377835, 106353868|LOC106353868, 106355888|LOC106355888, 106406326|LOC106406326, 106410673|LOC106410673, 106392161|LOC106392161, 106348746|LOC106348746, 106377834|LOC106377834, 106453030|LOC106453030, 106401486|LOC106401486, 106403712|LOC106403712, 106380862|LOC106380862, 106377836|LOC106377836, 106354628|LOC106354628, 106386015|LOC106386015, 106406258|LOC10…
bna00940	Metabolism	Biosynthesis of other secondary metabolites	Phenylpropanoid biosynthesis	5.44546	3.58544e-06	106397772|LOC106397772, 106437590|LOC106437590, 106451642|LOC106451642, 106362760|LOC106362760, 106398793|LOC106398793, 106453756|LOC106453756, 106410977|LOC106410977, 106388514|LOC106388514, 106388513|LOC106388513, 106387147|LOC106387147, 106391500|LOC106391500, 106411786|LOC106411786, 106387868|LOC106387868, 106368738|LOC106368738, 106361386|LOC106361386, 106387189|LOC106387189, 106369164|LOC10…
bna00591	Metabolism	Lipid metabolism	Linoleic acid metabolism	4.8133	1.53708e-05	106377835|LOC106377835, 106353868|LOC106353868, 106355888|LOC106355888, 106406326|LOC106406326, 106352821|LOC106352821, 106410673|LOC106410673, 106377834|LOC106377834, 106403712|LOC106403712, 106380862|LOC106380862, 106377836|LOC106377836, 106353334|LOC106353334, 106383072|LOC106383072
bna00410	Metabolism	Metabolism of other amino acids	beta-Alanine metabolism	4.01207	9.7258e-05	106400945|LOC106400945, 106348748|LOC106348748, 106402795|LOC106402795, 106390934|LOC106390934, 106391720|LOC106391720, 106443300|LOC106443300, 106439680|LOC106439680, 106396908|LOC106396908, 106351654|LOC106351654, 106439681|LOC106439681, 106351646|LOC106351646, 106446951|LOC106446951, 106366710|LOC106366710, 106386315|LOC106386315, 106371894|LOC106371894, 106451536|LOC106451536, 106367536|LOC10…
bna00250	Metabolism	Amino acid metabolism	Alanine, aspartate and glutamate metabolism	2.80724	0.0015587	106402795|LOC106402795, 106390498|LOC106390498, 106390934|LOC106390934, 106397664|LOC106397664, 106377194|LOC106377194, 106381340|LOC106381340, 106406022|LOC106406022, 106360452|LOC106360452, 106354452|LOC106354452, 106390423|LOC106390423, 106394680|LOC106394680, 106438380|LOC106438380, 106404391|LOC106404391, 106443238|LOC106443238, 106366710|LOC106366710, 106386315|LOC106386315, 106375295|LOC10…
bna00960	Metabolism	Biosynthesis of other secondary metabolites	Tropane, piperidine and pyridine alkaloid biosynthesis	1.90162	0.0125423	106447279|LOC106447279, 106447281|LOC106447281, 106384874|LOC106384874, 106401783|LOC106401783, 106380834|LOC106380834, 106439680|LOC106439680, 106396908|LOC106396908, 106394680|LOC106394680, 106446943|LOC106446943, 106439681|LOC106439681, 106384285|LOC106384285, 106368966|LOC106368966, 106445166|LOC106445166, 106446957|LOC106446957
bna00440	Metabolism	Metabolism of other amino acids	Phosphonate and phosphinate metabolism	1.80465	0.0156801	106396186|LOC106396186, 106446987|LOC106446987, 106404612|LOC106404612, 106450733|LOC106450733, 106372819|LOC106372819, 106404619|LOC106404619
bna00561	Metabolism	Lipid metabolism	Glycerolipid metabolism	1.69904	0.0199966	106400574|LOC106400574, 106452997|LOC106452997, 106453443|LOC106453443, 106387192|LOC106387192, 106354755|LOC106354755, 106443300|LOC106443300, 106438088|LOC106438088, 106438336|LOC106438336, 106366531|LOC106366531, 106396524|LOC106396524, 106389614|LOC106389614, 106352869|LOC106352869, 106380528|LOC106380528, 106353702|LOC106353702, 106371894|LOC106371894, 106375910|LOC106375910, 106402301|LOC10…
bna00945	Metabolism	Biosynthesis of other secondary metabolites	Stilbenoid, diarylheptanoid and gingerol biosynthesis	1.6771	0.0210332	106437590|LOC106437590, 106387868|LOC106387868, 106387189|LOC106387189, 106348399|LOC106348399, 106387187|LOC106387187, 106396668|LOC106396668, 106387869|LOC106387869
bna00062	Metabolism	Lipid metabolism	Fatty acid elongation	1.67671	0.0210516	106400786|LOC106400786, 106358599|LOC106358599, 106409944|LOC106409944, 106397919|LOC106397919, 106368542|LOC106368542, 106400507|LOC106400507, 106444577|LOC106444577, 106393937|LOC106393937, 106441129|LOC106441129, 106395059|LOC106395059, 106393913|LOC106393913, 106397134|LOC106397134
bna00564	Metabolism	Lipid metabolism	Glycerophospholipid metabolism	1.55219	0.0280423	106453443|LOC106453443, 106387192|LOC106387192, 106354755|LOC106354755, 106391128|LOC106391128, 106434540|LOC106434540, 106367016|LOC106367016, 106366531|LOC106366531, 106353695|LOC106353695, 106396186|LOC106396186, 106434550|LOC106434550, 106446987|LOC106446987, 106403843|LOC106403843, 106375910|LOC106375910, 106402301|LOC106402301, 106382211|LOC106382211, 106382639|LOC106382639, 106400894|LOC10…
bna00130	Metabolism	Metabolism of cofactors and vitamins	Ubiquinone and other terpenoid-quinone biosynthesis	1.51305	0.030687	106397772|LOC106397772, 106437590|LOC106437590, 106451642|LOC106451642, 106453756|LOC106453756, 106387868|LOC106387868, 106406285|LOC106406285, 106348399|LOC106348399, 106384874|LOC106384874, 106439660|LOC106439660, 106388005|LOC106388005, 106387869|LOC106387869, 106397335|LOC106397335, 106411305|LOC106411305
bna00941	Metabolism	Biosynthesis of other secondary metabolites	Flavonoid biosynthesis	1.47629	0.0333975	106437590|LOC106437590, 106382906|LOC106382906, 106387868|LOC106387868, 106387189|LOC106387189, 106348399|LOC106348399, 106387187|LOC106387187, 106364152|LOC106364152, 106396668|LOC106396668, 106372253|LOC106372253, 106387869|LOC106387869
bna00966	Metabolism	Biosynthesis of other secondary metabolites	Glucosinolate biosynthesis	1.46511	0.0342678	106379685|LOC106379685, 106447562|LOC106447562, 106385828|LOC106385828, 106377269|LOC106377269, 106367226|LOC106367226
bna00650	Metabolism	Carbohydrate metabolism	Butanoate metabolism	1.42676	0.0374316	106402795|LOC106402795, 106390934|LOC106390934, 106404391|LOC106404391, 106366710|LOC106366710, 106386315|LOC106386315, 106418115|LOC106418115, 106387720|LOC106387720, 106417763|LOC106417763
bna00430	Metabolism	Metabolism of other amino acids	Taurine and hypotaurine metabolism	1.32386	0.0474399	106402795|LOC106402795, 106390934|LOC106390934, 106366710|LOC106366710, 106386315|LOC106386315, 106418115|LOC106418115, 106387720|LOC106387720, 106417763|LOC106417763
bna00270	Metabolism	Amino acid metabolism	Cysteine and methionine metabolism	1.1846	0.0653736	106350872|LOC106350872, 106447616|LOC106447616, 106438967|LOC106438967, 106395982|LOC106395982, 106450450|LOC106450450, 106391720|LOC106391720, 106345635|LOC106345635, 106376249|LOC106376249, 106455056|LOC106455056, 106354773|LOC106354773, 106372189|LOC106372189, 106399195|LOC106399195, 106440395|LOC106440395, 106384874|LOC106384874, 106345453|LOC106345453, 106390423|LOC106390423, 106394680|LOC10…
bna00603	Metabolism	Glycan biosynthesis and metabolism	Glycosphingolipid biosynthesis - globo and isoglobo series	1.17846	0.0663045	106396524|LOC106396524, 106380528|LOC106380528, 106452139|LOC106452139, 106377506|LOC106377506
bna00520	Metabolism	Carbohydrate metabolism	Amino sugar and nucleotide sugar metabolism	1.09521	0.0803145	106349210|LOC106349210, 106415626|LOC106415626, 106387746|LOC106387746, 106366807|LOC106366807, 106349507|LOC106349507, 106349206|LOC106349206, 106352208|LOC106352208, 106408734|LOC106408734, 106387286|LOC106387286, 106354551|LOC106354551, 106367179|LOC106367179, 106404152|LOC106404152, 106441211|LOC106441211, 106410767|LOC106410767, 106388337|LOC106388337, 106377637|LOC106377637, 106368228|LOC10…
bna00071	Metabolism	Lipid metabolism	Fatty acid degradation	1.09358	0.0806157	106349686|LOC106349686, 106400945|LOC106400945, 106348748|LOC106348748, 106392161|LOC106392161, 106348746|LOC106348746, 106397390|LOC106397390, 106443300|LOC106443300, 106401486|LOC106401486, 106354628|LOC106354628, 106386015|LOC106386015, 106406258|LOC106406258, 106371894|LOC106371894
bna00220	Metabolism	Amino acid metabolism	Arginine biosynthesis	1.05638	0.0878251	106390498|LOC106390498, 106381340|LOC106381340, 106406022|LOC106406022, 106360452|LOC106360452, 106354452|LOC106354452, 106394680|LOC106394680, 106438380|LOC106438380, 106443238|LOC106443238, 106354451|LOC106354451, 106356016|LOC106356016, 106396854|LOC106396854, 106451035|LOC106451035
bna00965	Metabolism	Biosynthesis of other secondary metabolites	Betalain biosynthesis	1.04239	0.0907001	106406724|LOC106406724, 106402706|LOC106402706
bna01212	Metabolism	Global and overview maps	Fatty acid metabolism	1.03888	0.0914363	106349686|LOC106349686, 106400945|LOC106400945, 106366808|LOC106366808, 106348748|LOC106348748, 106381762|LOC106381762, 106453262|LOC106453262, 106452409|LOC106452409, 106348746|LOC106348746, 106397390|LOC106397390, 106381763|LOC106381763, 106401486|LOC106401486, 106445302|LOC106445302, 106445421|LOC106445421, 106416078|LOC106416078, 106389421|LOC106389421, 106406258|LOC106406258, 106444577|LOC10…
bna00920	Metabolism	Energy metabolism	Sulfur metabolism	1.02036	0.0954211	106443239|LOC106443239, 106417713|LOC106417713, 106345635|LOC106345635, 106354773|LOC106354773, 106378250|LOC106378250, 106382921|LOC106382921, 106451483|LOC106451483, 106346634|LOC106346634, 106354107|LOC106354107, 106442702|LOC106442702, 106410303|LOC106410303, 106410468|LOC106410468
bna00460	Metabolism	Metabolism of other amino acids	Cyanoamino acid metabolism	0.919709	0.120307	106387147|LOC106387147, 106400683|LOC106400683, 106400684|LOC106400684, 106372481|LOC106372481, 106387146|LOC106387146, 106396851|LOC106396851, 106352732|LOC106352732, 106396430|LOC106396430, 106391008|LOC106391008, 106391086|LOC106391086, 106447104|LOC106447104, 106376873|LOC106376873, 106451284|LOC106451284, 106386981|LOC106386981, 106353640|LOC106353640, 106394339|LOC106394339
bna00562	Metabolism	Carbohydrate metabolism	Inositol phosphate metabolism	0.894015	0.12764	106453198|LOC106453198, 106415479|LOC106415479, 106416255|LOC106416255, 106415478|LOC106415478, 106368706|LOC106368706, 106391128|LOC106391128, 106439227|LOC106439227, 106387397|LOC106387397, 106382921|LOC106382921, 106349466|LOC106349466, 106411102|LOC106411102, 106353425|LOC106353425, 106357943|LOC106357943, 106375926|LOC106375926, 106445381|LOC106445381, 106392231|LOC106392231, 106450263|LOC10…
bna00330	Metabolism	Amino acid metabolism	Arginine and proline metabolism	0.879832	0.131877	106350872|LOC106350872, 106395965|LOC106395965, 106451021|LOC106451021, 106396262|LOC106396262, 106391720|LOC106391720, 106443300|LOC106443300, 106372189|LOC106372189, 106411198|LOC106411198, 106438070|LOC106438070, 106394680|LOC106394680, 106351654|LOC106351654, 106351646|LOC106351646, 106371894|LOC106371894, 106367536|LOC106367536, 106415619|LOC106415619
bna00910	Metabolism	Energy metabolism	Nitrogen metabolism	0.871756	0.134352	106354597|LOC106354597, 106381340|LOC106381340, 106360452|LOC106360452, 106354452|LOC106354452, 106372522|LOC106372522, 106438380|LOC106438380, 106367815|LOC106367815, 106443238|LOC106443238, 106418601|LOC106418601, 106354451|LOC106354451, 106353470|LOC106353470, 106370694|LOC106370694
bna00480	Metabolism	Metabolism of other amino acids	Glutathione metabolism	0.865491	0.136304	106349212|LOC106349212, 106401061|LOC106401061, 106401696|LOC106401696, 106391720|LOC106391720, 106380476|LOC106380476, 106441218|LOC106441218, 106399298|LOC106399298, 106381328|LOC106381328, 106347996|LOC106347996, 106445991|LOC106445991, 106439834|LOC106439834, 106453704|LOC106453704, 106396928|LOC106396928, 106372323|LOC106372323, 106437732|LOC106437732, 106354403|LOC106354403, 106451535|LOC10…
bna00750	Metabolism	Metabolism of cofactors and vitamins	Vitamin B6 metabolism	0.854914	0.139665	106348515|LOC106348515, 106399564|LOC106399564, 106354245|LOC106354245, 106351387|LOC106351387, 106367699|LOC106367699
bna00909	Metabolism	Metabolism of terpenoids and polyketides	Sesquiterpenoid and triterpenoid biosynthesis	0.824412	0.149826	106354658|LOC106354658, 106371933|LOC106371933, 106353454|LOC106353454, 106414035|LOC106414035
bna00780	Metabolism	Metabolism of cofactors and vitamins	Biotin metabolism	0.817338	0.152287	106381762|LOC106381762, 106381763|LOC106381763, 106445302|LOC106445302, 106416078|LOC106416078, 106389421|LOC106389421, 106409576|LOC106409576
bna00450	Metabolism	Metabolism of other amino acids	Selenocompound metabolism	0.817338	0.152287	106447616|LOC106447616, 106438967|LOC106438967, 106356040|LOC106356040, 106355063|LOC106355063, 106410303|LOC106410303, 106361279|LOC106361279
bna01502	Human Diseases	Drug resistance: antimicrobial	Vancomycin resistance	0.788842	0.162614	106411280|LOC106411280
bna00760	Metabolism	Metabolism of cofactors and vitamins	Nicotinate and nicotinamide metabolism	0.772613	0.168806	106368501|LOC106368501, 106354690|LOC106354690, 106354689|LOC106354689, 106387404|LOC106387404, 106415565|LOC106415565, 106451881|LOC106451881
bna00350	Metabolism	Amino acid metabolism	Tyrosine metabolism	0.726199	0.187846	106392161|LOC106392161, 106384874|LOC106384874, 106439680|LOC106439680, 106396908|LOC106396908, 106380944|LOC106380944, 106394680|LOC106394680, 106354628|LOC106354628, 106386015|LOC106386015, 106439681|LOC106439681, 106391290|LOC106391290
bna00100	Metabolism	Lipid metabolism	Steroid biosynthesis	0.726199	0.187846	106384356|LOC106384356, 106387284|LOC106387284, 106385223|LOC106385223, 106366810|LOC106366810, 106353454|LOC106353454, 106396203|LOC106396203, 106368587|LOC106368587, 106395025|LOC106395025, 106392091|LOC106392091, 106414035|LOC106414035
bna03010	Genetic Information Processing	Translation	Ribosome	0.7102	0.194894	106433369|LOC106433369, 106433407|LOC106433407, 106365667|LOC106365667, 106451134|LOC106451134, 106366833|LOC106366833, 106376336|LOC106376336, 106454868|LOC106454868, 106365674|LOC106365674, 106390601|LOC106390601, 106400541|LOC106400541, 106366814|LOC106366814, 106386629|LOC106386629, 106363404|LOC106363404, 106400542|LOC106400542, 106354685|LOC106354685, 106346115|LOC106346115, 106366033|LOC10…
bna00710	Metabolism	Energy metabolism	Carbon fixation in photosynthetic organisms	0.697342	0.200751	106365675|LOC106365675, 106415318|LOC106415318, 106390498|LOC106390498, 106438973|LOC106438973, 106440038|LOC106440038, 106391482|LOC106391482, 106452368|LOC106452368, 106440395|LOC106440395, 106406022|LOC106406022, 106394680|LOC106394680, 106372316|LOC106372316, 106368818|LOC106368818, 106356016|LOC106356016, 106445265|LOC106445265, 106365604|LOC106365604, 106385336|LOC106385336, 106391858|LOC10…
bna00590	Metabolism	Lipid metabolism	Arachidonic acid metabolism	0.690551	0.203915	106401696|LOC106401696, 106380476|LOC106380476, 106445991|LOC106445991, 106396928|LOC106396928, 106437732|LOC106437732, 106445691|LOC106445691
bna00053	Metabolism	Carbohydrate metabolism	Ascorbate and aldarate metabolism	0.679101	0.209362	106453198|LOC106453198, 106401061|LOC106401061, 106443300|LOC106443300, 106367179|LOC106367179, 106347996|LOC106347996, 106439834|LOC106439834, 106371894|LOC106371894, 106446154|LOC106446154, 106371989|LOC106371989, 106445381|LOC106445381, 106368218|LOC106368218, 106357292|LOC106357292
bna00523	Metabolism	Metabolism of terpenoids and polyketides	Polyketide sugar unit biosynthesis	0.676294	0.21072	106445572|LOC106445572
bna00601	Metabolism	Glycan biosynthesis and metabolism	Glycosphingolipid biosynthesis - lacto and neolacto series	0.674041	0.211816	106452139|LOC106452139, 106377506|LOC106377506
bna00565	Metabolism	Lipid metabolism	Ether lipid metabolism	0.64981	0.22397	106391128|LOC106391128, 106367016|LOC106367016, 106366531|LOC106366531, 106403843|LOC106403843, 106382211|LOC106382211, 106382639|LOC106382639, 106450733|LOC106450733
bna00052	Metabolism	Carbohydrate metabolism	Galactose metabolism	0.58691	0.258875	106418461|LOC106418461, 106446161|LOC106446161, 106447959|LOC106447959, 106396524|LOC106396524, 106380528|LOC106380528, 106387449|LOC106387449, 106387293|LOC106387293, 106410765|LOC106410765, 106418226|LOC106418226, 106391407|LOC106391407, 106416177|LOC106416177, 106436268|LOC106436268
bna00073	Metabolism	Lipid metabolism	Cutin, suberine and wax biosynthesis	0.578464	0.263959	106451152|LOC106451152, 106361224|LOC106361224, 106421152|LOC106421152, 106357059|LOC106357059, 106399573|LOC106399573, 106403565|LOC106403565, 106361089|LOC106361089, 106361520|LOC106361520
bna04933	Human Diseases	Endocrine and metabolic disease	AGE-RAGE signaling pathway in diabetic complications	0.536525	0.29072	106374298|LOC106374298, 106387397|LOC106387397, 106379618|LOC106379618, 106349466|LOC106349466, 106411102|LOC106411102, 106450263|LOC106450263
bna00280	Metabolism	Amino acid metabolism	Valine, leucine and isoleucine degradation	0.535032	0.291721	106400945|LOC106400945, 106348748|LOC106348748, 106452089|LOC106452089, 106443300|LOC106443300, 106390423|LOC106390423, 106452226|LOC106452226, 106446951|LOC106446951, 106371894|LOC106371894, 106410712|LOC106410712, 106451536|LOC106451536
bna04016	Environmental Information Processing	Signal transduction	MAPK signaling pathway - plant	0.486909	0.325905	106365665|LOC106365665, 106391984|LOC106391984, 106348958|LOC106348958, 106408214|LOC106408214, 106354239|LOC106354239, 106385302|LOC106385302, 106443382|LOC106443382, 106438157|LOC106438157, 106446459|LOC106446459, 106364540|LOC106364540, 106353089|LOC106353089, 106387911|LOC106387911, 106406130|LOC106406130, 106452384|LOC106452384, 106397784|LOC106397784, 106415050|LOC106415050, 106415748|LOC10…
bna00380	Metabolism	Amino acid metabolism	Tryptophan metabolism	0.482224	0.32944	106443300|LOC106443300, 106375778|LOC106375778, 106365896|LOC106365896, 106371894|LOC106371894, 106404922|LOC106404922, 106371275|LOC106371275, 106393316|LOC106393316, 106395116|LOC106395116, 106375577|LOC106375577, 106440374|LOC106440374
bna00232	Metabolism	Biosynthesis of other secondary metabolites	Caffeine metabolism	0.469675	0.339098	106357878|LOC106357878
bna03410	Genetic Information Processing	Replication and repair	Base excision repair	0.456657	0.349416	106357489|LOC106357489, 106401750|LOC106401750, 106412213|LOC106412213, 106452373|LOC106452373, 106354818|LOC106354818, 106354683|LOC106354683, 106351274|LOC106351274, 106385365|LOC106385365
bna04130	Genetic Information Processing	Folding, sorting and degradation	SNARE interactions in vesicular transport	0.434113	0.368033	106346324|LOC106346324, 106402296|LOC106402296, 106415202|LOC106415202, 106385051|LOC106385051, 106385049|LOC106385049, 106362294|LOC106362294, 106388409|LOC106388409, 106362319|LOC106362319, 106362318|LOC106362318, 106414571|LOC106414571
bna00260	Metabolism	Amino acid metabolism	Glycine, serine and threonine metabolism	0.431712	0.370074	106390498|LOC106390498, 106452089|LOC106452089, 106443300|LOC106443300, 106406022|LOC106406022, 106399829|LOC106399829, 106439680|LOC106439680, 106396908|LOC106396908, 106345453|LOC106345453, 106390423|LOC106390423, 106446349|LOC106446349, 106439681|LOC106439681, 106377026|LOC106377026, 106354577|LOC106354577, 106356016|LOC106356016, 106376499|LOC106376499, 106446652|LOC106446652
bna00950	Metabolism	Biosynthesis of other secondary metabolites	Isoquinoline alkaloid biosynthesis	0.425692	0.375239	106384874|LOC106384874, 106439680|LOC106439680, 106396908|LOC106396908, 106394680|LOC106394680, 106439681|LOC106439681
bna04120	Genetic Information Processing	Folding, sorting and degradation	Ubiquitin mediated proteolysis	0.404938	0.393606	106431141|LOC106431141, 106451281|LOC106451281, 106402927|LOC106402927, 106368827|LOC106368827, 106348419|LOC106348419, 106387419|LOC106387419, 106447193|LOC106447193, 106389618|LOC106389618, 106382650|LOC106382650, 106403778|LOC106403778, 106417166|LOC106417166, 106401098|LOC106401098, 106354498|LOC106354498, 106368214|LOC106368214, 106369159|LOC106369159, 106415585|LOC106415585, 106376596|LOC10…
bna00010	Metabolism	Carbohydrate metabolism	Glycolysis / Gluconeogenesis	0.389441	0.407905	106365675|LOC106365675, 106415318|LOC106415318, 106392161|LOC106392161, 106438973|LOC106438973, 106452089|LOC106452089, 106443300|LOC106443300, 106396486|LOC106396486, 106391482|LOC106391482, 106452368|LOC106452368, 106354361|LOC106354361, 106354320|LOC106354320, 106385030|LOC106385030, 106387449|LOC106387449, 106354628|LOC106354628, 106386015|LOC106386015, 106372316|LOC106372316, 106371894|LOC10…
bna04146	Cellular Processes	Transport and catabolism	Peroxisome	0.383984	0.413062	106397390|LOC106397390, 106380594|LOC106380594, 106452364|LOC106452364, 106361224|LOC106361224, 106351060|LOC106351060, 106348338|LOC106348338, 106405987|LOC106405987, 106360531|LOC106360531, 106406258|LOC106406258, 106387064|LOC106387064, 106411335|LOC106411335, 106446718|LOC106446718, 106403565|LOC106403565, 106361089|LOC106361089, 106361520|LOC106361520, 106360981|LOC106360981, 106382680|LOC10…
bna00790	Metabolism	Metabolism of cofactors and vitamins	Folate biosynthesis	0.363596	0.432917	106411792|LOC106411792, 106390062|LOC106390062, 106354680|LOC106354680, 106354681|LOC106354681, 106411793|LOC106411793
bna00600	Metabolism	Lipid metabolism	Sphingolipid metabolism	0.363596	0.432917	106400578|LOC106400578, 106415772|LOC106415772, 106396524|LOC106396524, 106378341|LOC106378341, 106380528|LOC106380528
bna02010	Environmental Information Processing	Membrane transport	ABC transporters	0.352285	0.44434	106415477|LOC106415477, 106398037|LOC106398037, 106353586|LOC106353586, 106417318|LOC106417318, 106396442|LOC106396442
bna00902	Metabolism	Metabolism of terpenoids and polyketides	Monoterpenoid biosynthesis	0.350069	0.446613	106411616|LOC106411616
bna00906	Metabolism	Metabolism of terpenoids and polyketides	Carotenoid biosynthesis	0.341117	0.455914	106347114|LOC106347114, 106446766|LOC106446766, 106390565|LOC106390565, 106359477|LOC106359477, 106354700|LOC106354700, 106369285|LOC106369285
bna04626	Organismal Systems	Environmental adaptation	Plant-pathogen interaction	0.330678	0.467006	106366339|LOC106366339, 106348958|LOC106348958, 106408214|LOC106408214, 106372340|LOC106372340, 106451762|LOC106451762, 106387429|LOC106387429, 106385302|LOC106385302, 106440010|LOC106440010, 106404489|LOC106404489, 106387911|LOC106387911, 106447544|LOC106447544, 106452100|LOC106452100, 106387660|LOC106387660, 106389639|LOC106389639, 106370322|LOC106370322, 106410758|LOC106410758, 106389719|LOC10…
bna00901	Metabolism	Biosynthesis of other secondary metabolites	Indole alkaloid biosynthesis	0.330412	0.467292	106437669|LOC106437669, 106449271|LOC106449271, 106390929|LOC106390929
bna04141	Genetic Information Processing	Folding, sorting and degradation	Protein processing in endoplasmic reticulum	0.310099	0.489667	106451283|LOC106451283, 106451757|LOC106451757, 106386751|LOC106386751, 106406688|LOC106406688, 106397237|LOC106397237, 106397623|LOC106397623, 106386752|LOC106386752, 106387419|LOC106387419, 106389618|LOC106389618, 106396610|LOC106396610, 106451510|LOC106451510, 106451511|LOC106451511, 106446972|LOC106446972, 106377472|LOC106377472, 106360686|LOC106360686, 106387580|LOC106387580, 106347533|LOC10…
bna00030	Metabolism	Carbohydrate metabolism	Pentose phosphate pathway	0.287648	0.515646	106349212|LOC106349212, 106415318|LOC106415318, 106391482|LOC106391482, 106387449|LOC106387449, 106372316|LOC106372316, 106372323|LOC106372323, 106368818|LOC106368818, 106445265|LOC106445265, 106418226|LOC106418226, 106436268|LOC106436268
bna00333	Metabolism	Biosynthesis of other secondary metabolites	Prodigiosin biosynthesis	0.283431	0.520677	106445302|LOC106445302, 106389421|LOC106389421
bna00640	Metabolism	Carbohydrate metabolism	Propanoate metabolism	0.256315	0.554223	106400945|LOC106400945, 106348748|LOC106348748, 106452089|LOC106452089, 106446951|LOC106446951, 106451536|LOC106451536
bna00051	Metabolism	Carbohydrate metabolism	Fructose and mannose metabolism	0.249301	0.563247	106415318|LOC106415318, 106366807|LOC106366807, 106387286|LOC106387286, 106391482|LOC106391482, 106366273|LOC106366273, 106387449|LOC106387449, 106372316|LOC106372316, 106404456|LOC106404456, 106368818|LOC106368818, 106381063|LOC106381063, 106418226|LOC106418226, 106436268|LOC106436268
bna01040	Metabolism	Lipid metabolism	Biosynthesis of unsaturated fatty acids	0.240387	0.574927	106366808|LOC106366808, 106453262|LOC106453262, 106452409|LOC106452409, 106445302|LOC106445302, 106406258|LOC106406258
bna01210	Metabolism	Global and overview maps	2-Oxocarboxylic acid metabolism	0.237824	0.57833	106390498|LOC106390498, 106379685|LOC106379685, 106406022|LOC106406022, 106447562|LOC106447562, 106385828|LOC106385828, 106345453|LOC106345453, 106377269|LOC106377269, 106394680|LOC106394680, 106403500|LOC106403500, 106410712|LOC106410712, 106356016|LOC106356016, 106396854|LOC106396854, 106367226|LOC106367226, 106451035|LOC106451035
bna01230	Metabolism	Global and overview maps	Biosynthesis of amino acids	0.235157	0.581893	106365675|LOC106365675, 106438690|LOC106438690, 106395965|LOC106395965, 106415318|LOC106415318, 106451021|LOC106451021, 106389628|LOC106389628, 106397587|LOC106397587, 106447616|LOC106447616, 106396262|LOC106396262, 106438967|LOC106438967, 106395982|LOC106395982, 106390498|LOC106390498, 106438973|LOC106438973, 106450450|LOC106450450, 106451798|LOC106451798, 106345635|LOC106345635, 106391482|LOC10…
bna04122	Genetic Information Processing	Folding, sorting and degradation	Sulfur relay system	0.218168	0.605107	106354773|LOC106354773, 106441305|LOC106441305
bna00061	Metabolism	Lipid metabolism	Fatty acid biosynthesis	0.212201	0.613478	106366808|LOC106366808, 106381762|LOC106381762, 106397390|LOC106397390, 106381763|LOC106381763, 106445302|LOC106445302, 106445421|LOC106445421, 106416078|LOC106416078, 106389421|LOC106389421
bna00860	Metabolism	Metabolism of cofactors and vitamins	Porphyrin and chlorophyll metabolism	0.212201	0.613478	106380526|LOC106380526, 106406147|LOC106406147, 106368562|LOC106368562, 106401372|LOC106401372, 106357789|LOC106357789, 106424974|LOC106424974, 106416069|LOC106416069, 106368456|LOC106368456
bna00040	Metabolism	Carbohydrate metabolism	Pentose and glucuronate interconversions	0.211616	0.614304	106410328|LOC106410328, 106452978|LOC106452978, 106367179|LOC106367179, 106410439|LOC106410439, 106366185|LOC106366185, 106371112|LOC106371112, 106387293|LOC106387293, 106412069|LOC106412069, 106368660|LOC106368660, 106381167|LOC106381167, 106445845|LOC106445845, 106368218|LOC106368218, 106394341|LOC106394341, 106416267|LOC106416267, 106397148|LOC106397148, 106359593|LOC106359593, 106367682|LOC10…
bna00514	Metabolism	Glycan biosynthesis and metabolism	Other types of O-glycan biosynthesis	0.196834	0.635574	106365673|LOC106365673, 106445285|LOC106445285
bna00261	Metabolism	Biosynthesis of other secondary metabolites	Monobactam biosynthesis	0.177723	0.664166	106345453|LOC106345453, 106410303|LOC106410303
bna00908	Metabolism	Metabolism of terpenoids and polyketides	Zeatin biosynthesis	0.155433	0.699145	106384861|LOC106384861, 106406751|LOC106406751, 106365552|LOC106365552
bna00511	Metabolism	Glycan biosynthesis and metabolism	Other glycan degradation	0.152657	0.703629	106415772|LOC106415772, 106378341|LOC106378341
bna00400	Metabolism	Amino acid metabolism	Phenylalanine, tyrosine and tryptophan biosynthesis	0.150913	0.706459	106438690|LOC106438690, 106389628|LOC106389628, 106397587|LOC106397587, 106384874|LOC106384874, 106399829|LOC106399829, 106394680|LOC106394680, 106446349|LOC106446349, 106347647|LOC106347647, 106376499|LOC106376499
bna04075	Environmental Information Processing	Signal transduction	Plant hormone signal transduction	0.14818	0.710918	106365665|LOC106365665, 106453025|LOC106453025, 106445266|LOC106445266, 106454839|LOC106454839, 106353656|LOC106353656, 106453499|LOC106453499, 106391984|LOC106391984, 106453059|LOC106453059, 106452367|LOC106452367, 106354239|LOC106354239, 106351463|LOC106351463, 106452360|LOC106452360, 106438157|LOC106438157, 106380781|LOC106380781, 106390099|LOC106390099, 106446459|LOC106446459, 106350370|LOC10…
bna00531	Metabolism	Glycan biosynthesis and metabolism	Glycosaminoglycan degradation	0.147836	0.711482	106371822|LOC106371822
bna00900	Metabolism	Metabolism of terpenoids and polyketides	Terpenoid backbone biosynthesis	0.135607	0.731802	106384672|LOC106384672, 106361432|LOC106361432, 106401636|LOC106401636, 106435924|LOC106435924, 106382866|LOC106382866, 106440564|LOC106440564, 106385190|LOC106385190, 106385189|LOC106385189
bna00630	Metabolism	Carbohydrate metabolism	Glyoxylate and dicarboxylate metabolism	0.129824	0.741611	106390498|LOC106390498, 106380594|LOC106380594, 106452089|LOC106452089, 106440395|LOC106440395, 106381340|LOC106381340, 106406022|LOC106406022, 106360452|LOC106360452, 106354452|LOC106354452, 106372522|LOC106372522, 106387064|LOC106387064, 106354451|LOC106354451, 106356016|LOC106356016, 106385336|LOC106385336, 106391858|LOC106391858
bna00904	Metabolism	Metabolism of terpenoids and polyketides	Diterpenoid biosynthesis	0.128668	0.743587	106354788|LOC106354788, 106351318|LOC106351318, 106357378|LOC106357378, 106422838|LOC106422838
bna00340	Metabolism	Amino acid metabolism	Histidine metabolism	0.126095	0.748006	106443300|LOC106443300, 106451798|LOC106451798, 106371894|LOC106371894
bna00310	Metabolism	Amino acid metabolism	Lysine degradation	0.112816	0.771231	106438508|LOC106438508, 106368756|LOC106368756, 106443300|LOC106443300, 106371894|LOC106371894, 106446652|LOC106446652
bna00903	Metabolism	Metabolism of terpenoids and polyketides	Limonene and pinene degradation	0.112186	0.77235	106371894|LOC106371894
bna03440	Genetic Information Processing	Replication and repair	Homologous recombination	0.105071	0.785107	106357489|LOC106357489, 106451439|LOC106451439, 106401750|LOC106401750, 106397655|LOC106397655, 106371057|LOC106371057, 106360996|LOC106360996, 106360714|LOC106360714, 106409231|LOC106409231, 106427200|LOC106427200, 106362128|LOC106362128, 106354683|LOC106354683, 106434943|LOC106434943, 106383343|LOC106383343, 106378574|LOC106378574, 106353421|LOC106353421
bna00620	Metabolism	Carbohydrate metabolism	Pyruvate metabolism	0.0997029	0.794872	106452089|LOC106452089, 106443300|LOC106443300, 106380401|LOC106380401, 106410448|LOC106410448, 106396486|LOC106396486, 106440038|LOC106440038, 106440395|LOC106440395, 106352871|LOC106352871, 106397472|LOC106397472, 106385030|LOC106385030, 106371894|LOC106371894, 106385336|LOC106385336, 106348189|LOC106348189
bna04144	Cellular Processes	Transport and catabolism	Endocytosis	0.0958056	0.802037	106361087|LOC106361087, 106406688|LOC106406688, 106389879|LOC106389879, 106367016|LOC106367016, 106396610|LOC106396610, 106377472|LOC106377472, 106451671|LOC106451671, 106360686|LOC106360686, 106387580|LOC106387580, 106451548|LOC106451548, 106403843|LOC106403843, 106353095|LOC106353095, 106401239|LOC106401239, 106382211|LOC106382211, 106382639|LOC106382639, 106373632|LOC106373632, 106389483|LOC10…
bna04070	Environmental Information Processing	Signal transduction	Phosphatidylinositol signaling system	0.0689931	0.853114	106453198|LOC106453198, 106387192|LOC106387192, 106387397|LOC106387397, 106382921|LOC106382921, 106349466|LOC106349466, 106411102|LOC106411102, 106375910|LOC106375910, 106357943|LOC106357943, 106368843|LOC106368843, 106392231|LOC106392231, 106450263|LOC106450263
bna00290	Metabolism	Amino acid metabolism	Valine, leucine and isoleucine biosynthesis	0.0668881	0.857259	106379685|LOC106379685, 106410712|LOC106410712, 106367226|LOC106367226
bna03050	Genetic Information Processing	Folding, sorting and degradation	Proteasome	0.0561013	0.878818	106451289|LOC106451289, 106354769|LOC106354769, 106451769|LOC106451769, 106362024|LOC106362024, 106401780|LOC106401780, 106430489|LOC106430489, 106360398|LOC106360398, 106349758|LOC106349758, 106391232|LOC106391232
bna04712	Organismal Systems	Environmental adaptation	Circadian rhythm - plant	0.0539596	0.883162	106357361|LOC106357361, 106382607|LOC106382607, 106372253|LOC106372253, 106351799|LOC106351799
bna04136	Cellular Processes	Transport and catabolism	Autophagy - other	0.0472101	0.896995	106396762|LOC106396762, 106346195|LOC106346195, 106353216|LOC106353216, 106401002|LOC106401002, 106377032|LOC106377032
bna03040	Genetic Information Processing	Transcription	Spliceosome	0.0430673	0.905592	106406593|LOC106406593, 106346061|LOC106346061, 106387277|LOC106387277, 106366802|LOC106366802, 106453020|LOC106453020, 106453449|LOC106453449, 106406688|LOC106406688, 106382107|LOC106382107, 106346292|LOC106346292, 106392163|LOC106392163, 106382218|LOC106382218, 106410625|LOC106410625, 106366115|LOC106366115, 106396610|LOC106396610, 106377472|LOC106377472, 106360686|LOC106360686, 106387580|LOC10…
bna00905	Metabolism	Metabolism of terpenoids and polyketides	Brassinosteroid biosynthesis	0.0400923	0.911817	106349108|LOC106349108
bna03018	Genetic Information Processing	Folding, sorting and degradation	RNA degradation	0.0332115	0.926378	106418130|LOC106418130, 106382218|LOC106382218, 106354361|LOC106354361, 106372575|LOC106372575, 106354764|LOC106354764, 106361248|LOC106361248, 106390715|LOC106390715, 106354320|LOC106354320, 106402595|LOC106402595, 106402581|LOC106402581, 106387449|LOC106387449, 106452213|LOC106452213, 106401928|LOC106401928, 106418226|LOC106418226, 106452880|LOC106452880, 106436268|LOC106436268
bna00196	Metabolism	Energy metabolism	Photosynthesis - antenna proteins	0.0279891	0.937585	106440450|LOC106440450, 106361964|LOC106361964
bna00300	Metabolism	Amino acid metabolism	Lysine biosynthesis	0.0230557	0.948297	106345453|LOC106345453
bna01200	Metabolism	Global and overview maps	Carbon metabolism	0.0206902	0.953476	106349212|LOC106349212, 106400945|LOC106400945, 106365675|LOC106365675, 106415318|LOC106415318, 106348748|LOC106348748, 106390498|LOC106390498, 106438973|LOC106438973, 106380594|LOC106380594, 106452089|LOC106452089, 106396486|LOC106396486, 106345635|LOC106345635, 106440038|LOC106440038, 106391482|LOC106391482, 106452368|LOC106452368, 106354361|LOC106354361, 106440395|LOC106440395, 106406022|LOC10…
bna00020	Metabolism	Carbohydrate metabolism	Citrate cycle (TCA cycle)	0.0205412	0.953803	106452089|LOC106452089, 106396486|LOC106396486, 106440395|LOC106440395, 106382939|LOC106382939, 106403500|LOC106403500, 106385336|LOC106385336, 106348189|LOC106348189
bna00240	Metabolism	Nucleotide metabolism	Pyrimidine metabolism	0.0156757	0.964549	106357489|LOC106357489, 106401750|LOC106401750, 106401596|LOC106401596, 106397664|LOC106397664, 106418130|LOC106418130, 106441209|LOC106441209, 106451348|LOC106451348, 106415050|LOC106415050, 106377279|LOC106377279, 106415748|LOC106415748, 106439904|LOC106439904, 106354683|LOC106354683, 106360991|LOC106360991, 106376557|LOC106376557, 106386893|LOC106386893
bna00230	Metabolism	Nucleotide metabolism	Purine metabolism	0.0144873	0.967192	106357489|LOC106357489, 106401750|LOC106401750, 106403511|LOC106403511, 106443239|LOC106443239, 106417713|LOC106417713, 106397137|LOC106397137, 106411879|LOC106411879, 106418130|LOC106418130, 106378250|LOC106378250, 106357878|LOC106357878, 106385030|LOC106385030, 106415050|LOC106415050, 106415748|LOC106415748, 106375295|LOC106375295, 106410303|LOC106410303, 106354683|LOC106354683, 106360991|LOC10…
bna00563	Metabolism	Glycan biosynthesis and metabolism	Glycosylphosphatidylinositol (GPI)-anchor biosynthesis	0.0133649	0.969695	106370718|LOC106370718
bna00730	Metabolism	Metabolism of cofactors and vitamins	Thiamine metabolism	0.00826212	0.981156	106441305|LOC106441305
bna00670	Metabolism	Metabolism of cofactors and vitamins	One carbon pool by folate	0.00826212	0.981156	106353503|LOC106353503
bna03430	Genetic Information Processing	Replication and repair	Mismatch repair	0.00817799	0.981346	106451439|LOC106451439, 106401750|LOC106401750, 106371057|LOC106371057, 106410763|LOC106410763, 106391373|LOC106391373, 106409231|LOC106409231, 106354683|LOC106354683, 106378574|LOC106378574
bna03420	Genetic Information Processing	Replication and repair	Nucleotide excision repair	0.00400074	0.99083	106357489|LOC106357489, 106451439|LOC106451439, 106401750|LOC106401750, 106371057|LOC106371057, 106453031|LOC106453031, 106410763|LOC106410763, 106409231|LOC106409231, 106354683|LOC106354683, 106378574|LOC106378574, 106385500|LOC106385500
bna00970	Genetic Information Processing	Translation	Aminoacyl-tRNA biosynthesis	0.00241552	0.994453	106365664|LOC106365664, 106389006|LOC106389006, 106387281|LOC106387281, 106365663|LOC106365663, 106454078|LOC106454078, 106400568|LOC106400568
bna03015	Genetic Information Processing	Translation	mRNA surveillance pathway	0.00170991	0.996071	106351539|LOC106351539, 106350005|LOC106350005, 106390715|LOC106390715, 106402595|LOC106402595, 106362019|LOC106362019, 106402123|LOC106402123, 106402581|LOC106402581, 106368359|LOC106368359, 106358418|LOC106358418, 106366596|LOC106366596, 106346195|LOC106346195, 106452213|LOC106452213, 106452992|LOC106452992
bna03030	Genetic Information Processing	Replication and repair	DNA replication	0.0014145	0.996748	106357489|LOC106357489, 106451439|LOC106451439, 106401750|LOC106401750, 106371057|LOC106371057, 106410763|LOC106410763, 106409231|LOC106409231, 106354683|LOC106354683, 106378574|LOC106378574
bna00195	Metabolism	Energy metabolism	Photosynthesis	0.00113687	0.997386	106440261|LOC106440261, 106355829|LOC106355829, 106380499|LOC106380499, 106350097|LOC106350097, 106369134|LOC106369134
bna04145	Cellular Processes	Transport and catabolism	Phagosome	0.00108996	0.997493	106354666|LOC106354666, 106451512|LOC106451512, 106438778|LOC106438778, 106446933|LOC106446933, 106374298|LOC106374298, 106379618|LOC106379618, 106361414|LOC106361414, 106439437|LOC106439437, 106453959|LOC106453959, 106454754|LOC106454754
bna00770	Metabolism	Metabolism of cofactors and vitamins	Pantothenate and CoA biosynthesis	0.000963049	0.997785	106410712|LOC106410712
bna03020	Genetic Information Processing	Transcription	RNA polymerase	0.000665005	0.99847	106360991|LOC106360991, 106386893|LOC106386893
bna03022	Genetic Information Processing	Transcription	Basal transcription factors	0.000536505	0.998765	106410659|LOC106410659, 106364104|LOC106364104
bna00510	Metabolism	Glycan biosynthesis and metabolism	N-Glycan biosynthesis	0.000312846	0.99928	106451303|LOC106451303, 106386751|LOC106386751
bna03060	Genetic Information Processing	Folding, sorting and degradation	Protein export	0.00013107	0.999698	106347521|LOC106347521, 106380189|LOC106380189
bna00190	Metabolism	Energy metabolism	Oxidative phosphorylation	8.89244e-05	0.999795	106354655|LOC106354655, 106354666|LOC106354666, 106406037|LOC106406037, 106444819|LOC106444819, 106438778|LOC106438778, 106441664|LOC106441664, 106381550|LOC106381550, 106439321|LOC106439321, 106408244|LOC106408244, 106382939|LOC106382939, 106357815|LOC106357815, 106452560|LOC106452560, 106354844|LOC106354844, 106454754|LOC106454754, 106442746|LOC106442746
bna03008	Genetic Information Processing	Translation	Ribosome biogenesis in eukaryotes	8.87958e-05	0.999796	106445315|LOC106445315, 106451761|LOC106451761, 106366115|LOC106366115, 106372422|LOC106372422, 106380416|LOC106380416, 106452358|LOC106452358
bna03013	Genetic Information Processing	Translation	Nucleocytoplasmic transport	5.55417e-05	0.999872	106433858|LOC106433858, 106389825|LOC106389825, 106433386|LOC106433386, 106346004|LOC106346004, 106349121|LOC106349121, 106390715|LOC106390715, 106402595|LOC106402595, 106402581|LOC106402581, 106368359|LOC106368359, 106452213|LOC106452213, 106399915|LOC106399915, 106361828|LOC106361828, 106440477|LOC106440477, 106454812|LOC106454812, 106364690|LOC106364690

## Sheet: MT VS ST 30
Supplemental Data 3. KEGG analysis of DEGs between MS mutant and WT at different DAG.
ST: Time after germination of single-stem plants (WT), MT: Time after germination of multi-stems (MS) mutants.
TOP10 KEGG pathways were marked out.
bna00592	Metabolism	Lipid metabolism	alpha-Linolenic acid metabolism	4.03596	9.2053e-05	106349686|LOC106349686, 106453030|LOC106453030, 106401486|LOC106401486, 106348746|LOC106348746, 106392161|LOC106392161, 106360289|LOC106360289, 106387621|LOC106387621, 106383749|LOC106383749, 106358574|LOC106358574, 106446379|LOC106446379, 106391539|LOC106391539, 106350926|LOC106350926, 106417789|LOC106417789, 106381296|LOC106381296, 106446190|LOC106446190, 106345679|LOC106345679
bna03410	Genetic Information Processing	Replication and repair	Base excision repair	3.7216	0.000189845	106357489|LOC106357489, 106413548|LOC106413548, 106412213|LOC106412213, 106368390|LOC106368390, 106366600|LOC106366600, 106451838|LOC106451838, 106401749|LOC106401749, 106351274|LOC106351274, 106413547|LOC106413547, 106385365|LOC106385365, 106440085|LOC106440085, 106402665|LOC106402665, 106402818|LOC106402818, 106381619|LOC106381619
bna00591	Metabolism	Lipid metabolism	Linoleic acid metabolism	3.21754	0.000605989	106389295|LOC106389295, 106387621|LOC106387621, 106383749|LOC106383749, 106358574|LOC106358574, 106391539|LOC106391539, 106382626|LOC106382626, 106381296|LOC106381296, 106446190|LOC106446190
bna01212	Metabolism	Global and overview maps	Fatty acid metabolism	2.86015	0.00137991	106400945|LOC106400945, 106381762|LOC106381762, 106349686|LOC106349686, 106381763|LOC106381763, 106366808|LOC106366808, 106401486|LOC106401486, 106348748|LOC106348748, 106387283|LOC106387283, 106348746|LOC106348746, 106406010|LOC106406010, 106452409|LOC106452409, 106451405|LOC106451405, 106447907|LOC106447907, 106445302|LOC106445302, 106374831|LOC106374831, 106349745|LOC106349745, 106372160|LOC10…
bna00524	Metabolism	Biosynthesis of other secondary metabolites	Neomycin, kanamycin and gentamicin biosynthesis	2.75656	0.00175162	106416669|LOC106416669, 106402685|LOC106402685, 106406721|LOC106406721, 106368828|LOC106368828
bna04075	Environmental Information Processing	Signal transduction	Plant hormone signal transduction	2.56202	0.00274145	106433425|LOC106433425, 106453025|LOC106453025, 106365665|LOC106365665, 106453059|LOC106453059, 106368908|LOC106368908, 106346022|LOC106346022, 106450539|LOC106450539, 106399276|LOC106399276, 106446486|LOC106446486, 106439741|LOC106439741, 106451788|LOC106451788, 106443450|LOC106443450, 106446234|LOC106446234, 106381147|LOC106381147, 106364172|LOC106364172, 106381146|LOC106381146, 106454839|LOC10…
bna00561	Metabolism	Lipid metabolism	Glycerolipid metabolism	2.32841	0.00469446	106400574|LOC106400574, 106452997|LOC106452997, 106441883|LOC106441883, 106368843|LOC106368843, 106408937|LOC106408937, 106392218|LOC106392218, 106387192|LOC106387192, 106405546|LOC106405546, 106451630|LOC106451630, 106438336|LOC106438336, 106365008|LOC106365008, 106365007|LOC106365007, 106445942|LOC106445942, 106354849|LOC106354849, 106354846|LOC106354846, 106397630|LOC106397630, 106376661|LOC10…
bna00061	Metabolism	Lipid metabolism	Fatty acid biosynthesis	2.26087	0.0054844	106381762|LOC106381762, 106381763|LOC106381763, 106366808|LOC106366808, 106387283|LOC106387283, 106406010|LOC106406010, 106451405|LOC106451405, 106447907|LOC106447907, 106445302|LOC106445302, 106349745|LOC106349745, 106372160|LOC106372160, 106368974|LOC106368974, 106407111|LOC106407111, 106406006|LOC106406006
bna00071	Metabolism	Lipid metabolism	Fatty acid degradation	2.19465	0.00638782	106400945|LOC106400945, 106349686|LOC106349686, 106401486|LOC106401486, 106348748|LOC106348748, 106348746|LOC106348746, 106392161|LOC106392161, 106451405|LOC106451405, 106408937|LOC106408937, 106374831|LOC106374831, 106451630|LOC106451630, 106368974|LOC106368974, 106407111|LOC106407111
bna00904	Metabolism	Metabolism of terpenoids and polyketides	Diterpenoid biosynthesis	2.13878	0.00726479	106354788|LOC106354788, 106444436|LOC106444436, 106422857|LOC106422857, 106443099|LOC106443099, 106401876|LOC106401876, 106398038|LOC106398038, 106370917|LOC106370917, 106375948|LOC106375948, 106361601|LOC106361601
bna00960	Metabolism	Biosynthesis of other secondary metabolites	Tropane, piperidine and pyridine alkaloid biosynthesis	1.97687	0.010547	106447281|LOC106447281, 106447279|LOC106447279, 106368856|LOC106368856, 106384874|LOC106384874, 106447283|LOC106447283, 106438347|LOC106438347, 106446957|LOC106446957, 106446947|LOC106446947, 106413506|LOC106413506, 106446956|LOC106446956, 106450053|LOC106450053
bna00500	Metabolism	Carbohydrate metabolism	Starch and sucrose metabolism	1.94601	0.0113238	106354691|LOC106354691, 106387147|LOC106387147, 106445136|LOC106445136, 106383535|LOC106383535, 106347900|LOC106347900, 106440256|LOC106440256, 106394971|LOC106394971, 106382885|LOC106382885, 106387293|LOC106387293, 106400960|LOC106400960, 106439027|LOC106439027, 106416669|LOC106416669, 106372551|LOC106372551, 106423856|LOC106423856, 106387146|LOC106387146, 106365510|LOC106365510, 106393095|LOC10…
bna00590	Metabolism	Lipid metabolism	Arachidonic acid metabolism	1.72678	0.0187593	106389295|LOC106389295, 106451402|LOC106451402, 106445991|LOC106445991, 106390185|LOC106390185, 106451401|LOC106451401, 106359207|LOC106359207, 106382626|LOC106382626
bna00280	Metabolism	Amino acid metabolism	Valine, leucine and isoleucine degradation	1.62083	0.0239424	106400945|LOC106400945, 106348748|LOC106348748, 106452089|LOC106452089, 106350639|LOC106350639, 106408937|LOC106408937, 106346221|LOC106346221, 106374831|LOC106374831, 106451630|LOC106451630, 106453118|LOC106453118, 106390423|LOC106390423, 106407480|LOC106407480
bna00073	Metabolism	Lipid metabolism	Cutin, suberine and wax biosynthesis	1.6158	0.0242215	106361224|LOC106361224, 106438558|LOC106438558, 106371648|LOC106371648, 106382125|LOC106382125, 106353458|LOC106353458, 106395054|LOC106395054, 106407020|LOC106407020, 106370867|LOC106370867, 106451050|LOC106451050
bna00380	Metabolism	Amino acid metabolism	Tryptophan metabolism	1.5236	0.0299505	106408937|LOC106408937, 106403755|LOC106403755, 106354366|LOC106354366, 106381227|LOC106381227, 106374831|LOC106374831, 106415773|LOC106415773, 106399583|LOC106399583, 106451630|LOC106451630, 106437575|LOC106437575, 106378963|LOC106378963, 106372559|LOC106372559
bna00250	Metabolism	Amino acid metabolism	Alanine, aspartate and glutamate metabolism	1.38537	0.0411746	106368856|LOC106368856, 106352721|LOC106352721, 106371358|LOC106371358, 106354787|LOC106354787, 106348011|LOC106348011, 106397664|LOC106397664, 106355468|LOC106355468, 106357482|LOC106357482, 106372001|LOC106372001, 106390423|LOC106390423, 106372226|LOC106372226, 106445317|LOC106445317, 106390498|LOC106390498
bna00270	Metabolism	Amino acid metabolism	Cysteine and methionine metabolism	1.36629	0.0430243	106350872|LOC106350872, 106431327|LOC106431327, 106368856|LOC106368856, 106345635|LOC106345635, 106350639|LOC106350639, 106384874|LOC106384874, 106354773|LOC106354773, 106346221|LOC106346221, 106382860|LOC106382860, 106414306|LOC106414306, 106402810|LOC106402810, 106422042|LOC106422042, 106453118|LOC106453118, 106390423|LOC106390423, 106407480|LOC106407480, 106413506|LOC106413506, 106385546|LOC10…
bna04626	Organismal Systems	Environmental adaptation	Plant-pathogen interaction	1.32427	0.0473949	106406419|LOC106406419, 106372154|LOC106372154, 106439741|LOC106439741, 106451762|LOC106451762, 106404489|LOC106404489, 106452100|LOC106452100, 106438872|LOC106438872, 106356945|LOC106356945, 106356957|LOC106356957, 106352780|LOC106352780, 106410903|LOC106410903, 106392211|LOC106392211, 106351956|LOC106351956, 106407133|LOC106407133, 106407076|LOC106407076, 106397099|LOC106397099, 106406020|LOC10…
bna00909	Metabolism	Metabolism of terpenoids and polyketides	Sesquiterpenoid and triterpenoid biosynthesis	1.28253	0.0521757	106354658|LOC106354658, 106352011|LOC106352011, 106348280|LOC106348280, 106414035|LOC106414035
bna00940	Metabolism	Biosynthesis of other secondary metabolites	Phenylpropanoid biosynthesis	1.22979	0.0589133	106387147|LOC106387147, 106352321|LOC106352321, 106387189|LOC106387189, 106347900|LOC106347900, 106370045|LOC106370045, 106387187|LOC106387187, 106361612|LOC106361612, 106351645|LOC106351645, 106394971|LOC106394971, 106381125|LOC106381125, 106347962|LOC106347962, 106402051|LOC106402051, 106449535|LOC106449535, 106372551|LOC106372551, 106387146|LOC106387146, 106381124|LOC106381124, 106385033|LOC10…
bna00330	Metabolism	Amino acid metabolism	Arginine and proline metabolism	1.13214	0.0737664	106350872|LOC106350872, 106368856|LOC106368856, 106408937|LOC106408937, 106397131|LOC106397131, 106382860|LOC106382860, 106444284|LOC106444284, 106451630|LOC106451630, 106440920|LOC106440920, 106391557|LOC106391557, 106431030|LOC106431030, 106431049|LOC106431049, 106358109|LOC106358109
bna00790	Metabolism	Metabolism of cofactors and vitamins	Folate biosynthesis	1.1228	0.0753695	106411792|LOC106411792, 106354680|LOC106354680, 106390062|LOC106390062, 106354681|LOC106354681, 106379891|LOC106379891, 106382264|LOC106382264
bna02010	Environmental Information Processing	Membrane transport	ABC transporters	1.10101	0.079249	106376071|LOC106376071, 106350843|LOC106350843, 106401627|LOC106401627, 106450455|LOC106450455, 106392454|LOC106392454, 106396442|LOC106396442
bna00520	Metabolism	Carbohydrate metabolism	Amino sugar and nucleotide sugar metabolism	1.06218	0.0866604	106349210|LOC106349210, 106387746|LOC106387746, 106415626|LOC106415626, 106352208|LOC106352208, 106366807|LOC106366807, 106445136|LOC106445136, 106404152|LOC106404152, 106349206|LOC106349206, 106387286|LOC106387286, 106387293|LOC106387293, 106416669|LOC106416669, 106416511|LOC106416511, 106452384|LOC106452384, 106393095|LOC106393095, 106402685|LOC106402685, 106406721|LOC106406721, 106443513|LOC10…
bna00480	Metabolism	Metabolism of other amino acids	Glutathione metabolism	0.991978	0.101864	106349212|LOC106349212, 106451402|LOC106451402, 106445991|LOC106445991, 106454755|LOC106454755, 106390185|LOC106390185, 106451401|LOC106451401, 106354403|LOC106354403, 106369834|LOC106369834, 106352176|LOC106352176, 106438356|LOC106438356, 106371989|LOC106371989, 106364177|LOC106364177, 106447277|LOC106447277, 106359207|LOC106359207, 106375714|LOC106375714, 106388606|LOC106388606, 106358109|LOC10…
bna00780	Metabolism	Metabolism of cofactors and vitamins	Biotin metabolism	0.989424	0.102465	106381762|LOC106381762, 106381763|LOC106381763, 106406010|LOC106406010, 106447907|LOC106447907, 106445302|LOC106445302
bna00254	Metabolism	Biosynthesis of other secondary metabolites	Aflatoxin biosynthesis	0.943972	0.11377	106349745|LOC106349745
bna00640	Metabolism	Carbohydrate metabolism	Propanoate metabolism	0.906727	0.123958	106400945|LOC106400945, 106348748|LOC106348748, 106452089|LOC106452089, 106374831|LOC106374831, 106349745|LOC106349745, 106372160|LOC106372160
bna00340	Metabolism	Amino acid metabolism	Histidine metabolism	0.905148	0.124409	106451798|LOC106451798, 106360679|LOC106360679, 106408937|LOC106408937, 106396589|LOC106396589, 106451630|LOC106451630
bna00945	Metabolism	Biosynthesis of other secondary metabolites	Stilbenoid, diarylheptanoid and gingerol biosynthesis	0.896273	0.126978	106387189|LOC106387189, 106387187|LOC106387187, 106381125|LOC106381125, 106381124|LOC106381124
bna00052	Metabolism	Carbohydrate metabolism	Galactose metabolism	0.891091	0.128502	106418461|LOC106418461, 106387293|LOC106387293, 106400960|LOC106400960, 106416669|LOC106416669, 106443147|LOC106443147, 106402685|LOC106402685, 106406721|LOC106406721, 106349011|LOC106349011, 106439490|LOC106439490, 106368828|LOC106368828
bna00966	Metabolism	Biosynthesis of other secondary metabolites	Glucosinolate biosynthesis	0.883462	0.130779	106354366|LOC106354366, 106381227|LOC106381227, 106415773|LOC106415773
bna04712	Organismal Systems	Environmental adaptation	Circadian rhythm - plant	0.840822	0.144271	106396525|LOC106396525, 106348478|LOC106348478, 106348254|LOC106348254, 106395002|LOC106395002, 106404304|LOC106404304, 106366007|LOC106366007, 106383518|LOC106383518
bna00410	Metabolism	Metabolism of other amino acids	beta-Alanine metabolism	0.770776	0.169521	106400945|LOC106400945, 106348748|LOC106348748, 106408937|LOC106408937, 106451630|LOC106451630, 106440920|LOC106440920, 106431030|LOC106431030, 106431049|LOC106431049, 106358109|LOC106358109
bna04016	Environmental Information Processing	Signal transduction	MAPK signaling pathway - plant	0.634761	0.231867	106365665|LOC106365665, 106439741|LOC106439741, 106376722|LOC106376722, 106443450|LOC106443450, 106446234|LOC106446234, 106451376|LOC106451376, 106452384|LOC106452384, 106348528|LOC106348528, 106352780|LOC106352780, 106410903|LOC106410903, 106365899|LOC106365899, 106394536|LOC106394536, 106407133|LOC106407133, 106454643|LOC106454643, 106407076|LOC106407076, 106406020|LOC106406020, 106410357|LOC10…
bna00564	Metabolism	Lipid metabolism	Glycerophospholipid metabolism	0.613276	0.243626	106446714|LOC106446714, 106447056|LOC106447056, 106353695|LOC106353695, 106441883|LOC106441883, 106368843|LOC106368843, 106387192|LOC106387192, 106405546|LOC106405546, 106404619|LOC106404619, 106381084|LOC106381084, 106407643|LOC106407643, 106354682|LOC106354682, 106403536|LOC106403536, 106397630|LOC106397630, 106437627|LOC106437627, 106404612|LOC106404612, 106363742|LOC106363742
bna00760	Metabolism	Metabolism of cofactors and vitamins	Nicotinate and nicotinamide metabolism	0.59484	0.254191	106354690|LOC106354690, 106387404|LOC106387404, 106354689|LOC106354689, 106354545|LOC106354545
bna00903	Metabolism	Metabolism of terpenoids and polyketides	Limonene and pinene degradation	0.586558	0.259085	106408937|LOC106408937, 106451630|LOC106451630
bna01040	Metabolism	Lipid metabolism	Biosynthesis of unsaturated fatty acids	0.573508	0.266988	106366808|LOC106366808, 106387283|LOC106387283, 106452409|LOC106452409, 106447907|LOC106447907, 106445302|LOC106445302
bna00400	Metabolism	Amino acid metabolism	Phenylalanine, tyrosine and tryptophan biosynthesis	0.559251	0.275898	106389628|LOC106389628, 106368856|LOC106368856, 106377190|LOC106377190, 106384874|LOC106384874, 106438690|LOC106438690, 106397587|LOC106397587, 106365847|LOC106365847, 106376988|LOC106376988, 106413506|LOC106413506
bna00941	Metabolism	Biosynthesis of other secondary metabolites	Flavonoid biosynthesis	0.549402	0.282226	106387189|LOC106387189, 106387187|LOC106387187, 106381125|LOC106381125, 106381124|LOC106381124, 106449286|LOC106449286
bna00620	Metabolism	Carbohydrate metabolism	Pyruvate metabolism	0.548567	0.28277	106452089|LOC106452089, 106348189|LOC106348189, 106347227|LOC106347227, 106408937|LOC106408937, 106396486|LOC106396486, 106374831|LOC106374831, 106451630|LOC106451630, 106349745|LOC106349745, 106348105|LOC106348105, 106372160|LOC106372160, 106380401|LOC106380401, 106397472|LOC106397472, 106397771|LOC106397771
bna00010	Metabolism	Carbohydrate metabolism	Glycolysis / Gluconeogenesis	0.53615	0.290971	106365675|LOC106365675, 106452368|LOC106452368, 106452089|LOC106452089, 106392161|LOC106392161, 106452363|LOC106452363, 106348189|LOC106348189, 106347227|LOC106347227, 106408937|LOC106408937, 106416669|LOC106416669, 106396486|LOC106396486, 106354791|LOC106354791, 106443147|LOC106443147, 106402685|LOC106402685, 106451630|LOC106451630, 106406721|LOC106406721, 106348105|LOC106348105, 106377462|LOC10…
bna00053	Metabolism	Carbohydrate metabolism	Ascorbate and aldarate metabolism	0.526375	0.297595	106453198|LOC106453198, 106450519|LOC106450519, 106369834|LOC106369834, 106371989|LOC106371989, 106408937|LOC106408937, 106440879|LOC106440879, 106407713|LOC106407713, 106451630|LOC106451630
bna00900	Metabolism	Metabolism of terpenoids and polyketides	Terpenoid backbone biosynthesis	0.493506	0.320992	106450544|LOC106450544, 106385190|LOC106385190, 106386192|LOC106386192, 106374831|LOC106374831, 106381415|LOC106381415, 106384672|LOC106384672, 106443711|LOC106443711, 106385189|LOC106385189
bna00051	Metabolism	Carbohydrate metabolism	Fructose and mannose metabolism	0.485044	0.327308	106366807|LOC106366807, 106445136|LOC106445136, 106387286|LOC106387286, 106416669|LOC106416669, 106416511|LOC106416511, 106393095|LOC106393095, 106402685|LOC106402685, 106406721|LOC106406721, 106368828|LOC106368828, 106387967|LOC106387967
bna00902	Metabolism	Metabolism of terpenoids and polyketides	Monoterpenoid biosynthesis	0.479547	0.331477	106349407|LOC106349407
bna00333	Metabolism	Biosynthesis of other secondary metabolites	Prodigiosin biosynthesis	0.47776	0.332844	106447907|LOC106447907, 106445302|LOC106445302
bna00100	Metabolism	Lipid metabolism	Steroid biosynthesis	0.421485	0.378892	106366810|LOC106366810, 106440900|LOC106440900, 106348280|LOC106348280, 106371823|LOC106371823, 106375731|LOC106375731, 106414035|LOC106414035
bna00785	Metabolism	Metabolism of cofactors and vitamins	Lipoic acid metabolism	0.416546	0.383225	106380534|LOC106380534
bna01210	Metabolism	Global and overview maps	2-Oxocarboxylic acid metabolism	0.398525	0.399461	106431327|LOC106431327, 106368856|LOC106368856, 106350639|LOC106350639, 106346221|LOC106346221, 106354366|LOC106354366, 106381227|LOC106381227, 106415773|LOC106415773, 106453118|LOC106453118, 106407480|LOC106407480, 106390498|LOC106390498, 106363601|LOC106363601
bna00460	Metabolism	Metabolism of other amino acids	Cyanoamino acid metabolism	0.394525	0.403158	106387147|LOC106387147, 106372481|LOC106372481, 106347900|LOC106347900, 106394971|LOC106394971, 106359207|LOC106359207, 106372551|LOC106372551, 106387146|LOC106387146, 106386981|LOC106386981, 106358040|LOC106358040
bna00290	Metabolism	Amino acid metabolism	Valine, leucine and isoleucine biosynthesis	0.390913	0.406525	106350639|LOC106350639, 106346221|LOC106346221, 106453118|LOC106453118, 106407480|LOC106407480
bna00710	Metabolism	Energy metabolism	Carbon fixation in photosynthetic organisms	0.387632	0.409607	106365675|LOC106365675, 106452368|LOC106452368, 106368856|LOC106368856, 106452363|LOC106452363, 106348189|LOC106348189, 106354791|LOC106354791, 106381915|LOC106381915, 106348105|LOC106348105, 106365604|LOC106365604, 106397771|LOC106397771, 106390498|LOC106390498
bna00440	Metabolism	Metabolism of other amino acids	Phosphonate and phosphinate metabolism	0.378557	0.418257	106404619|LOC106404619, 106404612|LOC106404612
bna01200	Metabolism	Global and overview maps	Carbon metabolism	0.377748	0.419036	106365675|LOC106365675, 106349212|LOC106349212, 106400945|LOC106400945, 106452368|LOC106452368, 106348748|LOC106348748, 106368856|LOC106368856, 106452089|LOC106452089, 106345635|LOC106345635, 106454755|LOC106454755, 106452363|LOC106452363, 106380594|LOC106380594, 106352176|LOC106352176, 106348189|LOC106348189, 106347227|LOC106347227, 106416669|LOC106416669, 106348257|LOC106348257, 106396486|LOC10…
bna00630	Metabolism	Carbohydrate metabolism	Glyoxylate and dicarboxylate metabolism	0.369996	0.426583	106372673|LOC106372673, 106372522|LOC106372522, 106452089|LOC106452089, 106380594|LOC106380594, 106374831|LOC106374831, 106372001|LOC106372001, 106372226|LOC106372226, 106445942|LOC106445942, 106354849|LOC106354849, 106376661|LOC106376661, 106390498|LOC106390498, 106363601|LOC106363601
bna00908	Metabolism	Metabolism of terpenoids and polyketides	Zeatin biosynthesis	0.351754	0.444883	106406332|LOC106406332, 106379815|LOC106379815, 106415860|LOC106415860
bna00920	Metabolism	Energy metabolism	Sulfur metabolism	0.340536	0.456525	106345635|LOC106345635, 106354773|LOC106354773, 106417713|LOC106417713, 106443239|LOC106443239, 106402810|LOC106402810, 106367777|LOC106367777
bna00905	Metabolism	Metabolism of terpenoids and polyketides	Brassinosteroid biosynthesis	0.314245	0.485015	106349108|LOC106349108, 106380838|LOC106380838
bna00230	Metabolism	Nucleotide metabolism	Purine metabolism	0.303856	0.496757	106357489|LOC106357489, 106403511|LOC106403511, 106418130|LOC106418130, 106450946|LOC106450946, 106397137|LOC106397137, 106413548|LOC106413548, 106407021|LOC106407021, 106411879|LOC106411879, 106368204|LOC106368204, 106417713|LOC106417713, 106401749|LOC106401749, 106443239|LOC106443239, 106413318|LOC106413318, 106364850|LOC106364850, 106414278|LOC106414278, 106357482|LOC106357482, 106413317|LOC10…
bna00511	Metabolism	Glycan biosynthesis and metabolism	Other glycan degradation	0.302955	0.497789	106381130|LOC106381130, 106401512|LOC106401512
bna03420	Genetic Information Processing	Replication and repair	Nucleotide excision repair	0.291522	0.511067	106357489|LOC106357489, 106371057|LOC106371057, 106453235|LOC106453235, 106453031|LOC106453031, 106451439|LOC106451439, 106354445|LOC106354445, 106413548|LOC106413548, 106453960|LOC106453960, 106401749|LOC106401749, 106452310|LOC106452310, 106418393|LOC106418393, 106385500|LOC106385500, 106413547|LOC106413547
bna00906	Metabolism	Metabolism of terpenoids and polyketides	Carotenoid biosynthesis	0.291483	0.511113	106354700|LOC106354700, 106441091|LOC106441091, 106348955|LOC106348955, 106361235|LOC106361235
bna04070	Environmental Information Processing	Signal transduction	Phosphatidylinositol signaling system	0.281594	0.522884	106453198|LOC106453198, 106368843|LOC106368843, 106387397|LOC106387397, 106387192|LOC106387192, 106352780|LOC106352780, 106407133|LOC106407133, 106406020|LOC106406020, 106437627|LOC106437627, 106363742|LOC106363742, 106370558|LOC106370558
bna00950	Metabolism	Biosynthesis of other secondary metabolites	Isoquinoline alkaloid biosynthesis	0.279405	0.525527	106368856|LOC106368856, 106384874|LOC106384874, 106413506|LOC106413506
bna00260	Metabolism	Amino acid metabolism	Glycine, serine and threonine metabolism	0.27315	0.533151	106431327|LOC106431327, 106452089|LOC106452089, 106396929|LOC106396929, 106390423|LOC106390423, 106376988|LOC106376988, 106377462|LOC106377462, 106445942|LOC106445942, 106354849|LOC106354849, 106376661|LOC106376661, 106390498|LOC106390498
bna00750	Metabolism	Metabolism of cofactors and vitamins	Vitamin B6 metabolism	0.244103	0.570029	106405963|LOC106405963, 106381279|LOC106381279
bna00196	Metabolism	Energy metabolism	Photosynthesis - antenna proteins	0.235406	0.581559	106447496|LOC106447496, 106452462|LOC106452462, 106357831|LOC106357831
bna00770	Metabolism	Metabolism of cofactors and vitamins	Pantothenate and CoA biosynthesis	0.233797	0.583717	106350639|LOC106350639, 106346221|LOC106346221, 106453118|LOC106453118, 106407480|LOC106407480
bna04146	Cellular Processes	Transport and catabolism	Peroxisome	0.217736	0.605709	106361224|LOC106361224, 106438558|LOC106438558, 106371648|LOC106371648, 106380594|LOC106380594, 106452364|LOC106452364, 106351060|LOC106351060, 106451405|LOC106451405, 106395054|LOC106395054, 106407020|LOC106407020, 106368974|LOC106368974, 106407111|LOC106407111
bna00220	Metabolism	Amino acid metabolism	Arginine biosynthesis	0.207529	0.620113	106368856|LOC106368856, 106372001|LOC106372001, 106372226|LOC106372226, 106445317|LOC106445317, 106390498|LOC106390498
bna00030	Metabolism	Carbohydrate metabolism	Pentose phosphate pathway	0.176254	0.666417	106349212|LOC106349212, 106454755|LOC106454755, 106352176|LOC106352176, 106348257|LOC106348257, 106381915|LOC106381915, 106412106|LOC106412106
bna00563	Metabolism	Glycan biosynthesis and metabolism	Glycosylphosphatidylinositol (GPI)-anchor biosynthesis	0.166123	0.682146	106370718|LOC106370718, 106372585|LOC106372585
bna01230	Metabolism	Global and overview maps	Biosynthesis of amino acids	0.148736	0.710009	106365675|LOC106365675, 106452368|LOC106452368, 106451798|LOC106451798, 106431327|LOC106431327, 106389628|LOC106389628, 106368856|LOC106368856, 106345635|LOC106345635, 106452363|LOC106452363, 106360679|LOC106360679, 106350639|LOC106350639, 106377190|LOC106377190, 106384874|LOC106384874, 106438690|LOC106438690, 106397587|LOC106397587, 106346221|LOC106346221, 106354791|LOC106354791, 106381915|LOC10…
bna00450	Metabolism	Metabolism of other amino acids	Selenocompound metabolism	0.144759	0.716542	106356040|LOC106356040, 106355063|LOC106355063
bna00350	Metabolism	Amino acid metabolism	Tyrosine metabolism	0.132134	0.737676	106368856|LOC106368856, 106392161|LOC106392161, 106384874|LOC106384874, 106413506|LOC106413506
bna00650	Metabolism	Carbohydrate metabolism	Butanoate metabolism	0.12624	0.747756	106354787|LOC106354787, 106374831|LOC106374831
bna00360	Metabolism	Amino acid metabolism	Phenylalanine metabolism	0.123806	0.75196	106368856|LOC106368856, 106384874|LOC106384874, 106381125|LOC106381125, 106381124|LOC106381124, 106413506|LOC106413506
bna04122	Genetic Information Processing	Folding, sorting and degradation	Sulfur relay system	0.12149	0.755979	106354773|LOC106354773
bna03030	Genetic Information Processing	Replication and repair	DNA replication	0.118382	0.761408	106357489|LOC106357489, 106371057|LOC106371057, 106451439|LOC106451439, 106413548|LOC106413548, 106453960|LOC106453960, 106401749|LOC106401749, 106452310|LOC106452310, 106414278|LOC106414278, 106418393|LOC106418393, 106413547|LOC106413547
bna00514	Metabolism	Glycan biosynthesis and metabolism	Other types of O-glycan biosynthesis	0.110756	0.774896	106365673|LOC106365673
bna00261	Metabolism	Biosynthesis of other secondary metabolites	Monobactam biosynthesis	0.101083	0.792349	106431327|LOC106431327
bna00600	Metabolism	Lipid metabolism	Sphingolipid metabolism	0.0961567	0.801389	106400578|LOC106400578, 106360138|LOC106360138
bna00062	Metabolism	Lipid metabolism	Fatty acid elongation	0.0944718	0.804504	106346389|LOC106346389, 106450479|LOC106450479, 106415382|LOC106415382
bna03010	Genetic Information Processing	Translation	Ribosome	0.0926329	0.807918	106376336|LOC106376336, 106366833|LOC106366833, 106365667|LOC106365667, 106433407|LOC106433407, 106433369|LOC106433369, 106400541|LOC106400541, 106397227|LOC106397227, 106372613|LOC106372613, 106365674|LOC106365674, 106366814|LOC106366814, 106386629|LOC106386629, 106362022|LOC106362022, 106369660|LOC106369660, 106372477|LOC106372477, 106387996|LOC106387996, 106400542|LOC106400542, 106368211|LOC10…
bna00310	Metabolism	Amino acid metabolism	Lysine degradation	0.0866486	0.819127	106408937|LOC106408937, 106374831|LOC106374831, 106451630|LOC106451630
bna00020	Metabolism	Carbohydrate metabolism	Citrate cycle (TCA cycle)	0.0840944	0.823959	106452089|LOC106452089, 106348189|LOC106348189, 106347227|LOC106347227, 106396486|LOC106396486, 106348105|LOC106348105, 106363601|LOC106363601
bna00901	Metabolism	Biosynthesis of other secondary metabolites	Indole alkaloid biosynthesis	0.0807669	0.830296	106446597|LOC106446597
bna00240	Metabolism	Nucleotide metabolism	Pyrimidine metabolism	0.0727875	0.845693	106401596|LOC106401596, 106357489|LOC106357489, 106418130|LOC106418130, 106397664|LOC106397664, 106413548|LOC106413548, 106401749|LOC106401749, 106392184|LOC106392184, 106364850|LOC106364850, 106414278|LOC106414278, 106413547|LOC106413547, 106386893|LOC106386893, 106386345|LOC106386345
bna00565	Metabolism	Lipid metabolism	Ether lipid metabolism	0.0662363	0.858546	106407643|LOC106407643, 106403536|LOC106403536
bna03440	Genetic Information Processing	Replication and repair	Homologous recombination	0.0631095	0.86475	106357489|LOC106357489, 106371057|LOC106371057, 106453222|LOC106453222, 106397655|LOC106397655, 106451439|LOC106451439, 106453960|LOC106453960, 106401749|LOC106401749, 106452310|LOC106452310, 106418393|LOC106418393
bna00300	Metabolism	Amino acid metabolism	Lysine biosynthesis	0.0620781	0.866806	106431327|LOC106431327
bna00510	Metabolism	Glycan biosynthesis and metabolism	N-Glycan biosynthesis	0.0522517	0.886642	106386751|LOC106386751, 106451304|LOC106451304, 106451303|LOC106451303, 106378797|LOC106378797
bna04141	Genetic Information Processing	Folding, sorting and degradation	Protein processing in endoplasmic reticulum	0.0513248	0.888536	106451283|LOC106451283, 106386751|LOC106386751, 106397237|LOC106397237, 106451757|LOC106451757, 106397623|LOC106397623, 106368346|LOC106368346, 106368214|LOC106368214, 106377322|LOC106377322, 106451510|LOC106451510, 106389899|LOC106389899, 106353095|LOC106353095, 106346995|LOC106346995, 106354602|LOC106354602, 106371215|LOC106371215, 106402232|LOC106402232, 106451511|LOC106451511, 106451531|LOC10…
bna03040	Genetic Information Processing	Transcription	Spliceosome	0.0499958	0.89126	106382107|LOC106382107, 106346061|LOC106346061, 106453020|LOC106453020, 106389883|LOC106389883, 106406593|LOC106406593, 106387277|LOC106387277, 106410625|LOC106410625, 106451758|LOC106451758, 106366802|LOC106366802, 106392163|LOC106392163, 106388151|LOC106388151, 106383346|LOC106383346, 106353095|LOC106353095, 106402854|LOC106402854, 106406901|LOC106406901, 106412002|LOC106412002, 106446239|LOC10…
bna04120	Genetic Information Processing	Folding, sorting and degradation	Ubiquitin mediated proteolysis	0.0496186	0.892034	106451281|LOC106451281, 106368214|LOC106368214, 106449313|LOC106449313, 106402927|LOC106402927, 106404546|LOC106404546, 106389899|LOC106389899, 106346995|LOC106346995, 106348419|LOC106348419, 106386914|LOC106386914, 106358626|LOC106358626, 106385500|LOC106385500, 106374319|LOC106374319, 106346301|LOC106346301
bna00430	Metabolism	Metabolism of other amino acids	Taurine and hypotaurine metabolism	0.0440312	0.903584	106359207|LOC106359207
bna00970	Genetic Information Processing	Translation	Aminoacyl-tRNA biosynthesis	0.0399584	0.912098	106371956|LOC106371956, 106446377|LOC106446377, 106441506|LOC106441506, 106387290|LOC106387290, 106447892|LOC106447892, 106365664|LOC106365664
bna03050	Genetic Information Processing	Folding, sorting and degradation	Proteasome	0.0306625	0.931832	106451289|LOC106451289, 106354769|LOC106354769, 106401780|LOC106401780, 106362024|LOC106362024, 106451769|LOC106451769
bna00730	Metabolism	Metabolism of cofactors and vitamins	Thiamine metabolism	0.0301261	0.932983	106407021|LOC106407021
bna03020	Genetic Information Processing	Transcription	RNA polymerase	0.0291458	0.935092	106364850|LOC106364850, 106386893|LOC106386893, 106386345|LOC106386345
bna00562	Metabolism	Carbohydrate metabolism	Inositol phosphate metabolism	0.0284142	0.936668	106453198|LOC106453198, 106387397|LOC106387397, 106440879|LOC106440879, 106407713|LOC106407713, 106416365|LOC106416365
bna03430	Genetic Information Processing	Replication and repair	Mismatch repair	0.0267367	0.940293	106371057|LOC106371057, 106451439|LOC106451439, 106453960|LOC106453960, 106401749|LOC106401749, 106452310|LOC106452310, 106418393|LOC106418393
bna04933	Human Diseases	Endocrine and metabolic disease	AGE-RAGE signaling pathway in diabetic complications	0.0190668	0.957047	106387397|LOC106387397
bna00130	Metabolism	Metabolism of cofactors and vitamins	Ubiquinone and other terpenoid-quinone biosynthesis	0.01634	0.963075	106384874|LOC106384874, 106413506|LOC106413506
bna03060	Genetic Information Processing	Folding, sorting and degradation	Protein export	0.0116127	0.973615	106453034|LOC106453034, 106451803|LOC106451803, 106371215|LOC106371215
bna00860	Metabolism	Metabolism of cofactors and vitamins	Porphyrin and chlorophyll metabolism	0.00814595	0.981418	106411238|LOC106411238, 106411225|LOC106411225
bna04130	Genetic Information Processing	Folding, sorting and degradation	SNARE interactions in vesicular transport	0.00707867	0.983833	106402296|LOC106402296, 106407776|LOC106407776
bna03022	Genetic Information Processing	Transcription	Basal transcription factors	0.00683402	0.984387	106364104|LOC106364104, 106402668|LOC106402668
bna03008	Genetic Information Processing	Translation	Ribosome biogenesis in eukaryotes	0.0058694	0.986576	106445315|LOC106445315, 106451761|LOC106451761, 106409436|LOC106409436, 106380523|LOC106380523, 106444625|LOC106444625, 106364633|LOC106364633
bna00040	Metabolism	Carbohydrate metabolism	Pentose and glucuronate interconversions	0.00253646	0.994177	106410328|LOC106410328, 106387293|LOC106387293, 106362606|LOC106362606, 106405745|LOC106405745, 106387967|LOC106387967, 106450598|LOC106450598
bna00195	Metabolism	Energy metabolism	Photosynthesis	0.00225564	0.99482	106451413|LOC106451413, 106392064|LOC106392064, 106382925|LOC106382925
bna04136	Cellular Processes	Transport and catabolism	Autophagy - other	0.00178165	0.995906	106404501|LOC106404501
bna04145	Cellular Processes	Transport and catabolism	Phagosome	0.00171719	0.996054	106354666|LOC106354666, 106438778|LOC106438778, 106396411|LOC106396411, 106439437|LOC106439437, 106371215|LOC106371215, 106358436|LOC106358436
bna00190	Metabolism	Energy metabolism	Oxidative phosphorylation	0.00131886	0.996968	106406037|LOC106406037, 106354655|LOC106354655, 106354666|LOC106354666, 106444819|LOC106444819, 106384822|LOC106384822, 106358546|LOC106358546, 106438778|LOC106438778, 106354844|LOC106354844, 106361151|LOC106361151, 106409630|LOC106409630, 106391331|LOC106391331
bna03018	Genetic Information Processing	Folding, sorting and degradation	RNA degradation	0.000285382	0.999343	106418130|LOC106418130, 106451758|LOC106451758, 106438830|LOC106438830, 106354764|LOC106354764, 106444543|LOC106444543
bna03015	Genetic Information Processing	Translation	mRNA surveillance pathway	8.30037e-05	0.999809	106418167|LOC106418167, 106351539|LOC106351539, 106350005|LOC106350005, 106362019|LOC106362019, 106353885|LOC106353885
bna03013	Genetic Information Processing	Translation	Nucleocytoplasmic transport	4.45859e-05	0.999897	106433858|LOC106433858, 106433386|LOC106433386, 106389825|LOC106389825, 106349121|LOC106349121, 106454812|LOC106454812, 106354830|LOC106354830, 106399915|LOC106399915, 106348282|LOC106348282
bna04144	Cellular Processes	Transport and catabolism	Endocytosis	3.12399e-05	0.999928	106361087|LOC106361087, 106353095|LOC106353095, 106345292|LOC106345292, 106407643|LOC106407643, 106403536|LOC106403536, 106381813|LOC106381813, 106373632|LOC106373632, 106440398|LOC106440398

## Sheet: MT VS ST 35
Supplemental Data 3. KEGG analysis of DEGs between MS mutant and WT at different DAG.
ST: Time after germination of single-stem plants (WT), MT: Time after germination of multi-stems (MS) mutants.
TOP10 KEGG pathways were marked out.
bna04075	Environmental Information Processing	Signal transduction	Plant hormone signal transduction	6.72346	1.89033e-07	106433425|LOC106433425, 106365665|LOC106365665, 106453025|LOC106453025, 106364668|LOC106364668, 106416580|LOC106416580, 106397757|LOC106397757, 106453499|LOC106453499, 106346269|LOC106346269, 106400711|LOC106400711, 106400794|LOC106400794, 106446234|LOC106446234, 106454811|LOC106454811, 106348528|LOC106348528, 106446184|LOC106446184, 106450539|LOC106450539, 106449673|LOC106449673, 106446564|LOC10…
bna00592	Metabolism	Lipid metabolism	alpha-Linolenic acid metabolism	6.57063	2.68766e-07	106349686|LOC106349686, 106453030|LOC106453030, 106401486|LOC106401486, 106360289|LOC106360289, 106346097|LOC106346097, 106348746|LOC106348746, 106397650|LOC106397650, 106392161|LOC106392161, 106446190|LOC106446190, 106372515|LOC106372515, 106437957|LOC106437957, 106416621|LOC106416621, 106345679|LOC106345679, 106387698|LOC106387698, 106440735|LOC106440735, 106440734|LOC106440734, 106352449|LOC10…
bna04016	Environmental Information Processing	Signal transduction	MAPK signaling pathway - plant	3.57008	0.000269101	106365665|LOC106365665, 106364668|LOC106364668, 106446234|LOC106446234, 106348528|LOC106348528, 106449673|LOC106449673, 106399811|LOC106399811, 106452384|LOC106452384, 106347512|LOC106347512, 106405163|LOC106405163, 106438147|LOC106438147, 106439012|LOC106439012, 106410357|LOC106410357, 106407133|LOC106407133, 106440679|LOC106440679, 106405881|LOC106405881, 106450955|LOC106450955, 106397784|LOC10…
bna00561	Metabolism	Lipid metabolism	Glycerolipid metabolism	3.51914	0.000302595	106400574|LOC106400574, 106452997|LOC106452997, 106438654|LOC106438654, 106397630|LOC106397630, 106349443|LOC106349443, 106356928|LOC106356928, 106371894|LOC106371894, 106358370|LOC106358370, 106387192|LOC106387192, 106388797|LOC106388797, 106353364|LOC106353364, 106352869|LOC106352869, 106372515|LOC106372515, 106388796|LOC106388796, 106396546|LOC106396546, 106346084|LOC106346084, 106447472|LOC10…
bna00071	Metabolism	Lipid metabolism	Fatty acid degradation	2.80603	0.00156306	106349686|LOC106349686, 106400945|LOC106400945, 106401486|LOC106401486, 106348748|LOC106348748, 106346097|LOC106346097, 106348746|LOC106348746, 106356928|LOC106356928, 106371894|LOC106371894, 106392161|LOC106392161, 106396257|LOC106396257, 106397390|LOC106397390, 106396546|LOC106396546, 106382616|LOC106382616, 106451405|LOC106451405, 106408937|LOC106408937, 106410400|LOC106410400, 106448277|LOC10…
bna00590	Metabolism	Lipid metabolism	Arachidonic acid metabolism	2.4598	0.00346893	106445991|LOC106445991, 106451402|LOC106451402, 106389295|LOC106389295, 106390185|LOC106390185, 106451401|LOC106451401, 106396928|LOC106396928, 106372515|LOC106372515, 106439131|LOC106439131, 106428475|LOC106428475, 106380476|LOC106380476, 106418718|LOC106418718
bna00410	Metabolism	Metabolism of other amino acids	beta-Alanine metabolism	2.31838	0.00480413	106400945|LOC106400945, 106348748|LOC106348748, 106356928|LOC106356928, 106371894|LOC106371894, 106440920|LOC106440920, 106381825|LOC106381825, 106391720|LOC106391720, 106366710|LOC106366710, 106396546|LOC106396546, 106431049|LOC106431049, 106385479|LOC106385479, 106431030|LOC106431030, 106408937|LOC106408937, 106446951|LOC106446951, 106448277|LOC106448277, 106396040|LOC106396040, 106367536|LOC10…
bna00760	Metabolism	Metabolism of cofactors and vitamins	Nicotinate and nicotinamide metabolism	2.17158	0.00673629	106387404|LOC106387404, 106354690|LOC106354690, 106354545|LOC106354545, 106354689|LOC106354689, 106381282|LOC106381282, 106397260|LOC106397260, 106348464|LOC106348464, 106351009|LOC106351009, 106358422|LOC106358422, 106451881|LOC106451881
bna00591	Metabolism	Lipid metabolism	Linoleic acid metabolism	1.98521	0.0103463	106389295|LOC106389295, 106446190|LOC106446190, 106372515|LOC106372515, 106381296|LOC106381296, 106387621|LOC106387621, 106428475|LOC106428475, 106391539|LOC106391539, 106383749|LOC106383749
bna00480	Metabolism	Metabolism of other amino acids	Glutathione metabolism	1.83258	0.0147036	106349212|LOC106349212, 106445991|LOC106445991, 106451402|LOC106451402, 106388606|LOC106388606, 106371989|LOC106371989, 106390185|LOC106390185, 106451401|LOC106451401, 106382551|LOC106382551, 106441218|LOC106441218, 106396928|LOC106396928, 106354403|LOC106354403, 106401988|LOC106401988, 106367543|LOC106367543, 106391720|LOC106391720, 106353951|LOC106353951, 106444971|LOC106444971, 106441215|LOC10…
bna00280	Metabolism	Amino acid metabolism	Valine, leucine and isoleucine degradation	1.82678	0.014901	106400945|LOC106400945, 106348748|LOC106348748, 106452089|LOC106452089, 106356928|LOC106356928, 106371894|LOC106371894, 106452226|LOC106452226, 106380573|LOC106380573, 106381825|LOC106381825, 106396546|LOC106396546, 106362401|LOC106362401, 106408937|LOC106408937, 106446951|LOC106446951, 106453118|LOC106453118, 106448277|LOC106448277, 106346221|LOC106346221, 106407480|LOC106407480
bna00903	Metabolism	Metabolism of terpenoids and polyketides	Limonene and pinene degradation	1.75521	0.0175707	106356928|LOC106356928, 106371894|LOC106371894, 106396546|LOC106396546, 106408937|LOC106408937, 106448277|LOC106448277
bna00901	Metabolism	Biosynthesis of other secondary metabolites	Indole alkaloid biosynthesis	1.73642	0.0183478	106437669|LOC106437669, 106363696|LOC106363696, 106411787|LOC106411787, 106440003|LOC106440003, 106391072|LOC106391072, 106393895|LOC106393895, 106361671|LOC106361671
bna00904	Metabolism	Metabolism of terpenoids and polyketides	Diterpenoid biosynthesis	1.71401	0.0193191	106375617|LOC106375617, 106398038|LOC106398038, 106357378|LOC106357378, 106354788|LOC106354788, 106370917|LOC106370917, 106379322|LOC106379322, 106375234|LOC106375234, 106360135|LOC106360135, 106357909|LOC106357909, 106401876|LOC106401876, 106413725|LOC106413725
bna00902	Metabolism	Metabolism of terpenoids and polyketides	Monoterpenoid biosynthesis	1.67902	0.0209402	106402047|LOC106402047, 106349407|LOC106349407, 106349411|LOC106349411
bna00710	Metabolism	Energy metabolism	Carbon fixation in photosynthetic organisms	1.5832	0.0261097	106365675|LOC106365675, 106397771|LOC106397771, 106358527|LOC106358527, 106368856|LOC106368856, 106452368|LOC106452368, 106444895|LOC106444895, 106446351|LOC106446351, 106376498|LOC106376498, 106365604|LOC106365604, 106406022|LOC106406022, 106376497|LOC106376497, 106382027|LOC106382027, 106439388|LOC106439388, 106381931|LOC106381931, 106352647|LOC106352647, 106358129|LOC106358129, 106438973|LOC10…
bna01212	Metabolism	Global and overview maps	Fatty acid metabolism	1.40276	0.0395588	106349686|LOC106349686, 106400945|LOC106400945, 106401486|LOC106401486, 106348748|LOC106348748, 106366808|LOC106366808, 106381762|LOC106381762, 106381763|LOC106381763, 106452409|LOC106452409, 106346097|LOC106346097, 106348746|LOC106348746, 106417584|LOC106417584, 106418116|LOC106418116, 106381143|LOC106381143, 106445302|LOC106445302, 106396257|LOC106396257, 106447907|LOC106447907, 106397390|LOC10…
bna00340	Metabolism	Amino acid metabolism	Histidine metabolism	1.24845	0.0564353	106451798|LOC106451798, 106356928|LOC106356928, 106371894|LOC106371894, 106445767|LOC106445767, 106396546|LOC106396546, 106395488|LOC106395488, 106408937|LOC106408937, 106448277|LOC106448277
bna00601	Metabolism	Glycan biosynthesis and metabolism	Glycosphingolipid biosynthesis - lacto and neolacto series	1.20087	0.0629691	106377506|LOC106377506, 106452139|LOC106452139, 106401051|LOC106401051
bna00520	Metabolism	Carbohydrate metabolism	Amino sugar and nucleotide sugar metabolism	1.18337	0.0655583	106349210|LOC106349210, 106415626|LOC106415626, 106387746|LOC106387746, 106352208|LOC106352208, 106365920|LOC106365920, 106452384|LOC106452384, 106349206|LOC106349206, 106389885|LOC106389885, 106366807|LOC106366807, 106376641|LOC106376641, 106381938|LOC106381938, 106375449|LOC106375449, 106437640|LOC106437640, 106368228|LOC106368228, 106392805|LOC106392805, 106365561|LOC106365561, 106445572|LOC10…
bna00232	Metabolism	Biosynthesis of other secondary metabolites	Caffeine metabolism	1.17802	0.0663707	106345323|LOC106345323, 106357878|LOC106357878
bna00564	Metabolism	Lipid metabolism	Glycerophospholipid metabolism	1.17209	0.0672833	106438654|LOC106438654, 106354346|LOC106354346, 106397630|LOC106397630, 106349443|LOC106349443, 106367016|LOC106367016, 106358370|LOC106358370, 106387192|LOC106387192, 106388797|LOC106388797, 106372515|LOC106372515, 106388796|LOC106388796, 106403015|LOC106403015, 106358393|LOC106358393, 106444990|LOC106444990, 106388197|LOC106388197, 106453259|LOC106453259, 106370865|LOC106370865, 106353658|LOC10…
bna00945	Metabolism	Biosynthesis of other secondary metabolites	Stilbenoid, diarylheptanoid and gingerol biosynthesis	1.0795	0.0832718	106361880|LOC106361880, 106387187|LOC106387187, 106348399|LOC106348399, 106387189|LOC106387189, 106401934|LOC106401934, 106396668|LOC106396668
bna00603	Metabolism	Glycan biosynthesis and metabolism	Glycosphingolipid biosynthesis - globo and isoglobo series	1.07233	0.0846575	106377506|LOC106377506, 106452139|LOC106452139, 106401051|LOC106401051, 106396524|LOC106396524
bna00960	Metabolism	Biosynthesis of other secondary metabolites	Tropane, piperidine and pyridine alkaloid biosynthesis	1.0415	0.0908875	106447281|LOC106447281, 106447279|LOC106447279, 106368856|LOC106368856, 106384874|LOC106384874, 106438398|LOC106438398, 106353521|LOC106353521, 106395488|LOC106395488, 106446945|LOC106446945, 106368968|LOC106368968, 106388375|LOC106388375, 106438347|LOC106438347, 106445166|LOC106445166
bna01040	Metabolism	Lipid metabolism	Biosynthesis of unsaturated fatty acids	1.00897	0.0979552	106366808|LOC106366808, 106452409|LOC106452409, 106417584|LOC106417584, 106418116|LOC106418116, 106381143|LOC106381143, 106445302|LOC106445302, 106388205|LOC106388205, 106447907|LOC106447907, 106368664|LOC106368664
bna00270	Metabolism	Amino acid metabolism	Cysteine and methionine metabolism	0.998258	0.100402	106350872|LOC106350872, 106345635|LOC106345635, 106381467|LOC106381467, 106349119|LOC106349119, 106368856|LOC106368856, 106349415|LOC106349415, 106384874|LOC106384874, 106385546|LOC106385546, 106352132|LOC106352132, 106438398|LOC106438398, 106382000|LOC106382000, 106365298|LOC106365298, 106354773|LOC106354773, 106400855|LOC106400855, 106391720|LOC106391720, 106390528|LOC106390528, 106374519|LOC10…
bna00650	Metabolism	Carbohydrate metabolism	Butanoate metabolism	0.90763	0.1237	106391519|LOC106391519, 106391515|LOC106391515, 106404391|LOC106404391, 106380573|LOC106380573, 106366710|LOC106366710, 106354787|LOC106354787, 106396040|LOC106396040
bna00330	Metabolism	Amino acid metabolism	Arginine and proline metabolism	0.860636	0.137836	106350872|LOC106350872, 106368856|LOC106368856, 106356928|LOC106356928, 106371894|LOC106371894, 106352132|LOC106352132, 106388097|LOC106388097, 106440920|LOC106440920, 106391720|LOC106391720, 106396546|LOC106396546, 106431049|LOC106431049, 106385479|LOC106385479, 106431030|LOC106431030, 106408937|LOC106408937, 106448277|LOC106448277, 106367536|LOC106367536, 106416484|LOC106416484
bna00010	Metabolism	Carbohydrate metabolism	Glycolysis / Gluconeogenesis	0.828485	0.148428	106365675|LOC106365675, 106452089|LOC106452089, 106396486|LOC106396486, 106452368|LOC106452368, 106402942|LOC106402942, 106356928|LOC106356928, 106371894|LOC106371894, 106392161|LOC106392161, 106396546|LOC106396546, 106382616|LOC106382616, 106382027|LOC106382027, 106366266|LOC106366266, 106381931|LOC106381931, 106346522|LOC106346522, 106346521|LOC106346521, 106451055|LOC106451055, 106452556|LOC10…
bna00920	Metabolism	Energy metabolism	Sulfur metabolism	0.828207	0.148523	106345635|LOC106345635, 106357712|LOC106357712, 106381467|LOC106381467, 106381876|LOC106381876, 106354773|LOC106354773, 106369188|LOC106369188, 106396443|LOC106396443, 106347953|LOC106347953, 106443239|LOC106443239, 106417713|LOC106417713, 106439325|LOC106439325, 106348088|LOC106348088
bna00254	Metabolism	Biosynthesis of other secondary metabolites	Aflatoxin biosynthesis	0.754599	0.175955	106349745|LOC106349745
bna00360	Metabolism	Amino acid metabolism	Phenylalanine metabolism	0.723851	0.188864	106368856|LOC106368856, 106384874|LOC106384874, 106438398|LOC106438398, 106361880|LOC106361880, 106348399|LOC106348399, 106391500|LOC106391500, 106395488|LOC106395488, 106401934|LOC106401934, 106388515|LOC106388515, 106388514|LOC106388514, 106352757|LOC106352757, 106388375|LOC106388375, 106416484|LOC106416484
bna00908	Metabolism	Metabolism of terpenoids and polyketides	Zeatin biosynthesis	0.722639	0.189392	106406332|LOC106406332, 106384861|LOC106384861, 106365552|LOC106365552, 106406751|LOC106406751, 106365430|LOC106365430, 106415860|LOC106415860
bna02010	Environmental Information Processing	Membrane transport	ABC transporters	0.708191	0.195799	106353309|LOC106353309, 106390122|LOC106390122, 106418395|LOC106418395, 106450455|LOC106450455, 106392887|LOC106392887, 106396442|LOC106396442, 106392454|LOC106392454
bna00514	Metabolism	Glycan biosynthesis and metabolism	Other types of O-glycan biosynthesis	0.703113	0.198101	106365673|LOC106365673, 106445285|LOC106445285, 106382636|LOC106382636, 106382638|LOC106382638
bna00780	Metabolism	Metabolism of cofactors and vitamins	Biotin metabolism	0.700866	0.199129	106381762|LOC106381762, 106381763|LOC106381763, 106445302|LOC106445302, 106447907|LOC106447907, 106368664|LOC106368664, 106368386|LOC106368386
bna00941	Metabolism	Biosynthesis of other secondary metabolites	Flavonoid biosynthesis	0.699948	0.19955	106382906|LOC106382906, 106444537|LOC106444537, 106361880|LOC106361880, 106387187|LOC106387187, 106348399|LOC106348399, 106387189|LOC106387189, 106401934|LOC106401934, 106396668|LOC106396668
bna04146	Cellular Processes	Transport and catabolism	Peroxisome	0.678964	0.209429	106442544|LOC106442544, 106346563|LOC106346563, 106411335|LOC106411335, 106367999|LOC106367999, 106452364|LOC106452364, 106351060|LOC106351060, 106380594|LOC106380594, 106446673|LOC106446673, 106396257|LOC106396257, 106397390|LOC106397390, 106345323|LOC106345323, 106377019|LOC106377019, 106441215|LOC106441215, 106451405|LOC106451405, 106418144|LOC106418144, 106348881|LOC106348881, 106383372|LOC10…
bna00073	Metabolism	Lipid metabolism	Cutin, suberine and wax biosynthesis	0.663615	0.216963	106367999|LOC106367999, 106410643|LOC106410643, 106370867|LOC106370867, 106451050|LOC106451050, 106395007|LOC106395007, 106383372|LOC106383372, 106453405|LOC106453405, 106351744|LOC106351744, 106381281|LOC106381281
bna00630	Metabolism	Carbohydrate metabolism	Glyoxylate and dicarboxylate metabolism	0.653502	0.222074	106452089|LOC106452089, 106436527|LOC106436527, 106380594|LOC106380594, 106415908|LOC106415908, 106444895|LOC106444895, 106353364|LOC106353364, 106446351|LOC106446351, 106376498|LOC106376498, 106406022|LOC106406022, 106376497|LOC106376497, 106352647|LOC106352647, 106418144|LOC106418144, 106358129|LOC106358129, 106352649|LOC106352649, 106356016|LOC106356016, 106402348|LOC106402348, 106390498|LOC10…
bna00523	Metabolism	Metabolism of terpenoids and polyketides	Polyketide sugar unit biosynthesis	0.64313	0.227442	106445572|LOC106445572
bna00062	Metabolism	Lipid metabolism	Fatty acid elongation	0.633024	0.232796	106346389|LOC106346389, 106381143|LOC106381143, 106388205|LOC106388205, 106390743|LOC106390743, 106410302|LOC106410302, 106415649|LOC106415649, 106365726|LOC106365726, 106393937|LOC106393937, 106362262|LOC106362262
bna00906	Metabolism	Metabolism of terpenoids and polyketides	Carotenoid biosynthesis	0.632423	0.233119	106354425|LOC106354425, 106441091|LOC106441091, 106347114|LOC106347114, 106361235|LOC106361235, 106416491|LOC106416491, 106379426|LOC106379426, 106354700|LOC106354700, 106394225|LOC106394225
bna00940	Metabolism	Biosynthesis of other secondary metabolites	Phenylpropanoid biosynthesis	0.575961	0.265484	106352732|LOC106352732, 106443611|LOC106443611, 106407007|LOC106407007, 106374260|LOC106374260, 106387146|LOC106387146, 106404936|LOC106404936, 106361880|LOC106361880, 106412061|LOC106412061, 106409336|LOC106409336, 106449128|LOC106449128, 106387187|LOC106387187, 106351645|LOC106351645, 106348399|LOC106348399, 106417473|LOC106417473, 106386981|LOC106386981, 106387189|LOC106387189, 106391500|LOC10…
bna00333	Metabolism	Biosynthesis of other secondary metabolites	Prodigiosin biosynthesis	0.540568	0.288026	106445302|LOC106445302, 106447907|LOC106447907, 106368664|LOC106368664
bna00640	Metabolism	Carbohydrate metabolism	Propanoate metabolism	0.536858	0.290497	106400945|LOC106400945, 106348748|LOC106348748, 106452089|LOC106452089, 106396384|LOC106396384, 106381825|LOC106381825, 106349745|LOC106349745, 106446951|LOC106446951
bna00565	Metabolism	Lipid metabolism	Ether lipid metabolism	0.536858	0.290497	106367016|LOC106367016, 106372515|LOC106372515, 106358393|LOC106358393, 106388197|LOC106388197, 106453259|LOC106453259, 106428475|LOC106428475, 106450733|LOC106450733
bna04070	Environmental Information Processing	Signal transduction	Phosphatidylinositol signaling system	0.531102	0.294373	106453198|LOC106453198, 106399811|LOC106399811, 106415086|LOC106415086, 106407133|LOC106407133, 106387192|LOC106387192, 106352780|LOC106352780, 106357943|LOC106357943, 106445241|LOC106445241, 106444990|LOC106444990, 106387397|LOC106387397, 106382926|LOC106382926, 106438004|LOC106438004, 106347953|LOC106347953, 106432792|LOC106432792, 106381121|LOC106381121, 106447950|LOC106447950, 106348088|LOC10…
bna00260	Metabolism	Amino acid metabolism	Glycine, serine and threonine metabolism	0.514136	0.306101	106452089|LOC106452089, 106436527|LOC106436527, 106402942|LOC106402942, 106415908|LOC106415908, 106446673|LOC106446673, 106353364|LOC106353364, 106406022|LOC106406022, 106381286|LOC106381286, 106399829|LOC106399829, 106396929|LOC106396929, 106407128|LOC106407128, 106358129|LOC106358129, 106355450|LOC106355450, 106356016|LOC106356016, 106402348|LOC106402348, 106390498|LOC106390498, 106446652|LOC10…
bna00061	Metabolism	Lipid metabolism	Fatty acid biosynthesis	0.505645	0.312144	106366808|LOC106366808, 106381762|LOC106381762, 106381763|LOC106381763, 106445302|LOC106445302, 106396257|LOC106396257, 106447907|LOC106447907, 106397390|LOC106397390, 106368664|LOC106368664, 106451405|LOC106451405, 106349745|LOC106349745, 106389662|LOC106389662
bna00250	Metabolism	Amino acid metabolism	Alanine, aspartate and glutamate metabolism	0.503571	0.313638	106446075|LOC106446075, 106391519|LOC106391519, 106368856|LOC106368856, 106397664|LOC106397664, 106391515|LOC106391515, 106404391|LOC106404391, 106406022|LOC106406022, 106366710|LOC106366710, 106358858|LOC106358858, 106354787|LOC106354787, 106358129|LOC106358129, 106356016|LOC106356016, 106390498|LOC106390498, 106396040|LOC106396040
bna00230	Metabolism	Nucleotide metabolism	Purine metabolism	0.501762	0.314947	106357489|LOC106357489, 106403511|LOC106403511, 106397137|LOC106397137, 106357712|LOC106357712, 106418130|LOC106418130, 106396846|LOC106396846, 106381282|LOC106381282, 106354683|LOC106354683, 106381941|LOC106381941, 106401749|LOC106401749, 106413317|LOC106413317, 106345323|LOC106345323, 106413318|LOC106413318, 106396876|LOC106396876, 106388274|LOC106388274, 106369188|LOC106369188, 106416486|LOC10…
bna04130	Genetic Information Processing	Folding, sorting and degradation	SNARE interactions in vesicular transport	0.463832	0.343691	106402296|LOC106402296, 106452501|LOC106452501, 106416182|LOC106416182, 106388409|LOC106388409, 106381501|LOC106381501, 106402531|LOC106402531, 106390699|LOC106390699, 106349368|LOC106349368, 106445151|LOC106445151, 106353064|LOC106353064, 106382938|LOC106382938
bna00750	Metabolism	Metabolism of cofactors and vitamins	Vitamin B6 metabolism	0.453053	0.352328	106371607|LOC106371607, 106351387|LOC106351387, 106381286|LOC106381286, 106399564|LOC106399564
bna04712	Organismal Systems	Environmental adaptation	Circadian rhythm - plant	0.418635	0.381387	106346269|LOC106346269, 106397555|LOC106397555, 106381881|LOC106381881, 106396525|LOC106396525, 106382607|LOC106382607, 106369019|LOC106369019, 106357361|LOC106357361, 106345289|LOC106345289
bna00350	Metabolism	Amino acid metabolism	Tyrosine metabolism	0.410357	0.388725	106368856|LOC106368856, 106384874|LOC106384874, 106380944|LOC106380944, 106438398|LOC106438398, 106392161|LOC106392161, 106382616|LOC106382616, 106395488|LOC106395488, 106410400|LOC106410400, 106388375|LOC106388375
bna00909	Metabolism	Metabolism of terpenoids and polyketides	Sesquiterpenoid and triterpenoid biosynthesis	0.406143	0.392516	106354658|LOC106354658, 106371933|LOC106371933, 106352011|LOC106352011
bna00604	Metabolism	Glycan biosynthesis and metabolism	Glycosphingolipid biosynthesis - ganglio series	0.394487	0.403193	106418278|LOC106418278
bna00380	Metabolism	Amino acid metabolism	Tryptophan metabolism	0.367566	0.428977	106356928|LOC106356928, 106371894|LOC106371894, 106396546|LOC106396546, 106408937|LOC106408937, 106448277|LOC106448277, 106440733|LOC106440733, 106403755|LOC106403755, 106372559|LOC106372559, 106416484|LOC106416484, 106440736|LOC106440736
bna03410	Genetic Information Processing	Replication and repair	Base excision repair	0.357334	0.439203	106357489|LOC106357489, 106412213|LOC106412213, 106368390|LOC106368390, 106354683|LOC106354683, 106401749|LOC106401749, 106387266|LOC106387266, 106405613|LOC106405613, 106451839|LOC106451839
bna00261	Metabolism	Biosynthesis of other secondary metabolites	Monobactam biosynthesis	0.353108	0.443499	106357712|LOC106357712, 106369188|LOC106369188, 106407128|LOC106407128
bna00511	Metabolism	Glycan biosynthesis and metabolism	Other glycan degradation	0.307406	0.492713	106378341|LOC106378341, 106381130|LOC106381130, 106418278|LOC106418278
bna00600	Metabolism	Lipid metabolism	Sphingolipid metabolism	0.294971	0.507024	106400578|LOC106400578, 106378341|LOC106378341, 106396524|LOC106396524, 106372740|LOC106372740, 106418278|LOC106418278
bna00790	Metabolism	Metabolism of cofactors and vitamins	Folate biosynthesis	0.294971	0.507024	106390062|LOC106390062, 106354680|LOC106354680, 106354681|LOC106354681, 106345503|LOC106345503, 106348065|LOC106348065
bna00100	Metabolism	Lipid metabolism	Steroid biosynthesis	0.272975	0.533365	106366810|LOC106366810, 106440900|LOC106440900, 106372515|LOC106372515, 106371823|LOC106371823, 106375731|LOC106375731, 106395025|LOC106395025, 106384356|LOC106384356, 106428475|LOC106428475
bna00785	Metabolism	Metabolism of cofactors and vitamins	Lipoic acid metabolism	0.268418	0.538992	106390779|LOC106390779
bna00310	Metabolism	Amino acid metabolism	Lysine degradation	0.263259	0.545433	106356928|LOC106356928, 106371894|LOC106371894, 106446673|LOC106446673, 106396546|LOC106396546, 106408937|LOC106408937, 106448277|LOC106448277, 106446652|LOC106446652
bna00053	Metabolism	Carbohydrate metabolism	Ascorbate and aldarate metabolism	0.262739	0.546086	106453198|LOC106453198, 106371989|LOC106371989, 106356928|LOC106356928, 106371894|LOC106371894, 106407713|LOC106407713, 106396546|LOC106396546, 106408937|LOC106408937, 106448277|LOC106448277, 106372159|LOC106372159, 106354606|LOC106354606
bna00450	Metabolism	Metabolism of other amino acids	Selenocompound metabolism	0.251663	0.560192	106357712|LOC106357712, 106369188|LOC106369188, 106355063|LOC106355063, 106356040|LOC106356040
bna00910	Metabolism	Energy metabolism	Nitrogen metabolism	0.247587	0.565474	106354597|LOC106354597, 106446075|LOC106446075, 106397776|LOC106397776, 106446818|LOC106446818, 106394675|LOC106394675, 106381913|LOC106381913, 106353470|LOC106353470, 106367213|LOC106367213, 106402362|LOC106402362
bna00290	Metabolism	Amino acid metabolism	Valine, leucine and isoleucine biosynthesis	0.231055	0.587415	106362401|LOC106362401, 106453118|LOC106453118, 106346221|LOC106346221, 106407480|LOC106407480, 106379685|LOC106379685
bna00524	Metabolism	Biosynthesis of other secondary metabolites	Neomycin, kanamycin and gentamicin biosynthesis	0.225606	0.594832	106402685|LOC106402685
bna00460	Metabolism	Metabolism of other amino acids	Cyanoamino acid metabolism	0.212004	0.613757	106436527|LOC106436527, 106352732|LOC106352732, 106387146|LOC106387146, 106412061|LOC106412061, 106372481|LOC106372481, 106386981|LOC106386981, 106387147|LOC106387147, 106439131|LOC106439131, 106368405|LOC106368405, 106380979|LOC106380979, 106402348|LOC106402348, 106396430|LOC106396430
bna00562	Metabolism	Carbohydrate metabolism	Inositol phosphate metabolism	0.210283	0.616194	106453198|LOC106453198, 106415086|LOC106415086, 106407713|LOC106407713, 106357943|LOC106357943, 106387397|LOC106387397, 106382926|LOC106382926, 106347953|LOC106347953, 106432792|LOC106432792, 106416255|LOC106416255, 106415479|LOC106415479, 106415478|LOC106415478, 106381121|LOC106381121, 106348088|LOC106348088
bna00950	Metabolism	Biosynthesis of other secondary metabolites	Isoquinoline alkaloid biosynthesis	0.191039	0.644111	106368856|LOC106368856, 106384874|LOC106384874, 106438398|LOC106438398, 106388375|LOC106388375
bna04122	Genetic Information Processing	Folding, sorting and degradation	Sulfur relay system	0.185887	0.651798	106381467|LOC106381467, 106354773|LOC106354773
bna00440	Metabolism	Metabolism of other amino acids	Phosphonate and phosphinate metabolism	0.175842	0.66705	106453259|LOC106453259, 106450733|LOC106450733
bna00900	Metabolism	Metabolism of terpenoids and polyketides	Terpenoid backbone biosynthesis	0.15301	0.703056	106372413|LOC106372413, 106390570|LOC106390570, 106380573|LOC106380573, 106450544|LOC106450544, 106381942|LOC106381942, 106385189|LOC106385189, 106381415|LOC106381415, 106384672|LOC106384672, 106385190|LOC106385190
bna00430	Metabolism	Metabolism of other amino acids	Taurine and hypotaurine metabolism	0.14813	0.711	106366710|LOC106366710, 106439131|LOC106439131, 106396040|LOC106396040
bna00240	Metabolism	Nucleotide metabolism	Pyrimidine metabolism	0.144377	0.717172	106357489|LOC106357489, 106401596|LOC106401596, 106440412|LOC106440412, 106418130|LOC106418130, 106397664|LOC106397664, 106381609|LOC106381609, 106381282|LOC106381282, 106354683|LOC106354683, 106381941|LOC106381941, 106401749|LOC106401749, 106416486|LOC106416486, 106386893|LOC106386893, 106389330|LOC106389330, 106391223|LOC106391223, 106389340|LOC106389340, 106401494|LOC106401494, 106382537|LOC10…
bna00620	Metabolism	Carbohydrate metabolism	Pyruvate metabolism	0.134692	0.733345	106397771|LOC106397771, 106452089|LOC106452089, 106396486|LOC106396486, 106358527|LOC106358527, 106356928|LOC106356928, 106371894|LOC106371894, 106396546|LOC106396546, 106439388|LOC106439388, 106366266|LOC106366266, 106408937|LOC106408937, 106349745|LOC106349745, 106448277|LOC106448277, 106348189|LOC106348189, 106348105|LOC106348105, 106394762|LOC106394762
bna00531	Metabolism	Glycan biosynthesis and metabolism	Glycosaminoglycan degradation	0.129493	0.742177	106418278|LOC106418278
bna00220	Metabolism	Amino acid metabolism	Arginine biosynthesis	0.127104	0.74627	106446075|LOC106446075, 106368856|LOC106368856, 106406022|LOC106406022, 106396876|LOC106396876, 106358129|LOC106358129, 106356016|LOC106356016, 106390498|LOC106390498
bna00500	Metabolism	Carbohydrate metabolism	Starch and sucrose metabolism	0.124708	0.750398	106354691|LOC106354691, 106352732|LOC106352732, 106376534|LOC106376534, 106380881|LOC106380881, 106365560|LOC106365560, 106394738|LOC106394738, 106405632|LOC106405632, 106387146|LOC106387146, 106346734|LOC106346734, 106382178|LOC106382178, 106412061|LOC106412061, 106417948|LOC106417948, 106405722|LOC106405722, 106386981|LOC106386981, 106381341|LOC106381341, 106387147|LOC106387147, 106368405|LOC10…
bna00040	Metabolism	Carbohydrate metabolism	Pentose and glucuronate interconversions	0.123356	0.752738	106409544|LOC106409544, 106381139|LOC106381139, 106438246|LOC106438246, 106393609|LOC106393609, 106378037|LOC106378037, 106439508|LOC106439508, 106380668|LOC106380668, 106452978|LOC106452978, 106451055|LOC106451055, 106450439|LOC106450439, 106397148|LOC106397148, 106410328|LOC106410328, 106387293|LOC106387293, 106353973|LOC106353973, 106372159|LOC106372159, 106347564|LOC106347564, 106428402|LOC10…
bna04136	Cellular Processes	Transport and catabolism	Autophagy - other	0.123164	0.75307	106404501|LOC106404501, 106381787|LOC106381787, 106381579|LOC106381579, 106396762|LOC106396762, 106378423|LOC106378423, 106360403|LOC106360403, 106352066|LOC106352066
bna00770	Metabolism	Metabolism of cofactors and vitamins	Pantothenate and CoA biosynthesis	0.10861	0.778736	106362401|LOC106362401, 106453118|LOC106453118, 106346221|LOC106346221, 106356535|LOC106356535, 106407480|LOC106407480
bna03010	Genetic Information Processing	Translation	Ribosome	0.10527	0.784748	106433407|LOC106433407, 106390601|LOC106390601, 106372613|LOC106372613, 106365667|LOC106365667, 106366833|LOC106366833, 106376336|LOC106376336, 106365674|LOC106365674, 106397227|LOC106397227, 106433369|LOC106433369, 106449191|LOC106449191, 106362022|LOC106362022, 106386629|LOC106386629, 106400581|LOC106400581, 106451134|LOC106451134, 106400541|LOC106400541, 106369660|LOC106369660, 106366033|LOC10…
bna01200	Metabolism	Global and overview maps	Carbon metabolism	0.104034	0.786985	106349212|LOC106349212, 106365675|LOC106365675, 106400945|LOC106400945, 106348748|LOC106348748, 106397771|LOC106397771, 106345635|LOC106345635, 106452089|LOC106452089, 106446075|LOC106446075, 106436527|LOC106436527, 106396486|LOC106396486, 106380594|LOC106380594, 106358527|LOC106358527, 106368856|LOC106368856, 106452368|LOC106452368, 106402942|LOC106402942, 106415908|LOC106415908, 106444895|LOC10…
bna00400	Metabolism	Amino acid metabolism	Phenylalanine, tyrosine and tryptophan biosynthesis	0.100242	0.793885	106389628|LOC106389628, 106368856|LOC106368856, 106384874|LOC106384874, 106438398|LOC106438398, 106399829|LOC106399829, 106395488|LOC106395488, 106355450|LOC106355450, 106388375|LOC106388375, 106347647|LOC106347647
bna00670	Metabolism	Metabolism of cofactors and vitamins	One carbon pool by folate	0.098138	0.797741	106436527|LOC106436527, 106402348|LOC106402348, 106346429|LOC106346429
bna03420	Genetic Information Processing	Replication and repair	Nucleotide excision repair	0.0962816	0.801158	106357489|LOC106357489, 106451439|LOC106451439, 106371057|LOC106371057, 106453031|LOC106453031, 106385158|LOC106385158, 106354445|LOC106354445, 106354485|LOC106354485, 106354683|LOC106354683, 106401749|LOC106401749, 106382564|LOC106382564, 106448019|LOC106448019, 106389611|LOC106389611, 106381770|LOC106381770, 106445587|LOC106445587, 106382566|LOC106382566, 106381719|LOC106381719, 106360390|LOC10…
bna01210	Metabolism	Global and overview maps	2-Oxocarboxylic acid metabolism	0.0639695	0.863039	106368856|LOC106368856, 106406022|LOC106406022, 106441215|LOC106441215, 106362401|LOC106362401, 106407128|LOC106407128, 106358129|LOC106358129, 106356016|LOC106356016, 106453118|LOC106453118, 106390498|LOC106390498, 106346221|LOC106346221, 106407480|LOC106407480, 106379685|LOC106379685
bna00740	Metabolism	Metabolism of cofactors and vitamins	Riboflavin metabolism	0.0624033	0.866157	106438205|LOC106438205, 106348065|LOC106348065
bna00966	Metabolism	Biosynthesis of other secondary metabolites	Glucosinolate biosynthesis	0.0588187	0.873336	106379685|LOC106379685
bna03050	Genetic Information Processing	Folding, sorting and degradation	Proteasome	0.0584427	0.874092	106451769|LOC106451769, 106451289|LOC106451289, 106354769|LOC106354769, 106381048|LOC106381048, 106381049|LOC106381049, 106388256|LOC106388256, 106369687|LOC106369687, 106382723|LOC106382723, 106382701|LOC106382701, 106417340|LOC106417340
bna03430	Genetic Information Processing	Replication and repair	Mismatch repair	0.0558289	0.879369	106451439|LOC106451439, 106371057|LOC106371057, 106354683|LOC106354683, 106401749|LOC106401749, 106382564|LOC106382564, 106348839|LOC106348839, 106448019|LOC106448019, 106389611|LOC106389611, 106445587|LOC106445587, 106382566|LOC106382566, 106381719|LOC106381719, 106360390|LOC106360390
bna00563	Metabolism	Glycan biosynthesis and metabolism	Glycosylphosphatidylinositol (GPI)-anchor biosynthesis	0.0502384	0.890762	106370718|LOC106370718, 106372585|LOC106372585
bna03008	Genetic Information Processing	Translation	Ribosome biogenesis in eukaryotes	0.0496204	0.89203	106451761|LOC106451761, 106445315|LOC106445315, 106389696|LOC106389696, 106380523|LOC106380523, 106381881|LOC106381881, 106385719|LOC106385719, 106371952|LOC106371952, 106381057|LOC106381057, 106403684|LOC106403684, 106390968|LOC106390968, 106377952|LOC106377952, 106381621|LOC106381621, 106366115|LOC106366115, 106391187|LOC106391187, 106444625|LOC106444625
bna00020	Metabolism	Carbohydrate metabolism	Citrate cycle (TCA cycle)	0.0457581	0.899999	106452089|LOC106452089, 106396486|LOC106396486, 106378878|LOC106378878, 106396384|LOC106396384, 106382939|LOC106382939, 106441215|LOC106441215, 106375496|LOC106375496, 106348189|LOC106348189, 106348105|LOC106348105
bna00130	Metabolism	Metabolism of cofactors and vitamins	Ubiquinone and other terpenoid-quinone biosynthesis	0.0434746	0.904743	106384874|LOC106384874, 106438398|LOC106438398, 106388005|LOC106388005, 106348399|LOC106348399, 106388375|LOC106388375
bna03020	Genetic Information Processing	Transcription	RNA polymerase	0.0425184	0.906738	106381941|LOC106381941, 106416486|LOC106416486, 106386893|LOC106386893, 106417096|LOC106417096, 106435549|LOC106435549, 106350139|LOC106350139
bna03030	Genetic Information Processing	Replication and repair	DNA replication	0.0418152	0.908207	106357489|LOC106357489, 106451439|LOC106451439, 106371057|LOC106371057, 106354683|LOC106354683, 106401749|LOC106401749, 106382564|LOC106382564, 106448019|LOC106448019, 106389611|LOC106389611, 106445587|LOC106445587, 106391223|LOC106391223, 106382566|LOC106382566, 106375627|LOC106375627, 106381719|LOC106381719, 106360390|LOC106360390
bna03022	Genetic Information Processing	Transcription	Basal transcription factors	0.0366451	0.919083	106371586|LOC106371586, 106354485|LOC106354485, 106396961|LOC106396961, 106364104|LOC106364104, 106382625|LOC106382625, 106407357|LOC106407357
bna00905	Metabolism	Metabolism of terpenoids and polyketides	Brassinosteroid biosynthesis	0.0318842	0.929214	106401625|LOC106401625
bna03060	Genetic Information Processing	Folding, sorting and degradation	Protein export	0.0298998	0.93347	106453034|LOC106453034, 106451803|LOC106451803, 106415667|LOC106415667, 106406660|LOC106406660, 106381932|LOC106381932, 106380189|LOC106380189, 106346670|LOC106346670
bna00052	Metabolism	Carbohydrate metabolism	Galactose metabolism	0.0198685	0.955282	106396524|LOC106396524, 106418278|LOC106418278, 106387293|LOC106387293, 106407573|LOC106407573, 106443147|LOC106443147, 106402685|LOC106402685
bna00196	Metabolism	Energy metabolism	Photosynthesis - antenna proteins	0.0198629	0.955294	106447497|LOC106447497, 106361964|LOC106361964
bna00860	Metabolism	Metabolism of cofactors and vitamins	Porphyrin and chlorophyll metabolism	0.0193197	0.95649	106375753|LOC106375753, 106375754|LOC106375754, 106348754|LOC106348754, 106416069|LOC106416069, 106440765|LOC106440765
bna00300	Metabolism	Amino acid metabolism	Lysine biosynthesis	0.0175231	0.960455	106407128|LOC106407128
bna03440	Genetic Information Processing	Replication and repair	Homologous recombination	0.0111305	0.974697	106357489|LOC106357489, 106451439|LOC106451439, 106371057|LOC106371057, 106453222|LOC106453222, 106397655|LOC106397655, 106354683|LOC106354683, 106401749|LOC106401749, 106381457|LOC106381457, 106382916|LOC106382916, 106382917|LOC106382917, 106381719|LOC106381719, 106360390|LOC106360390
bna00510	Metabolism	Glycan biosynthesis and metabolism	N-Glycan biosynthesis	0.0102203	0.976742	106386751|LOC106386751, 106451304|LOC106451304, 106451303|LOC106451303, 106382365|LOC106382365, 106362059|LOC106362059
bna03040	Genetic Information Processing	Transcription	Spliceosome	0.0098239	0.977634	106406593|LOC106406593, 106346061|LOC106346061, 106453020|LOC106453020, 106366802|LOC106366802, 106382107|LOC106382107, 106387277|LOC106387277, 106451758|LOC106451758, 106381636|LOC106381636, 106383346|LOC106383346, 106440694|LOC106440694, 106381512|LOC106381512, 106382496|LOC106382496, 106401239|LOC106401239, 106346292|LOC106346292, 106389883|LOC106389883, 106382218|LOC106382218, 106353095|LOC10…
bna00051	Metabolism	Carbohydrate metabolism	Fructose and mannose metabolism	0.00829338	0.981085	106366807|LOC106366807, 106376641|LOC106376641, 106382027|LOC106382027, 106381931|LOC106381931, 106370916|LOC106370916, 106416511|LOC106416511, 106402685|LOC106402685
bna03018	Genetic Information Processing	Folding, sorting and degradation	RNA degradation	0.00800956	0.981726	106438830|LOC106438830, 106418130|LOC106418130, 106451758|LOC106451758, 106451331|LOC106451331, 106371662|LOC106371662, 106382218|LOC106382218, 106382479|LOC106382479, 106438373|LOC106438373, 106390968|LOC106390968, 106384754|LOC106384754, 106347687|LOC106347687, 106380532|LOC106380532, 106376728|LOC106376728, 106452880|LOC106452880, 106375106|LOC106375106
bna00730	Metabolism	Metabolism of cofactors and vitamins	Thiamine metabolism	0.00575105	0.986845	106372413|LOC106372413
bna04120	Genetic Information Processing	Folding, sorting and degradation	Ubiquitin mediated proteolysis	0.00423998	0.990285	106451281|LOC106451281, 106402927|LOC106402927, 106385158|LOC106385158, 106368214|LOC106368214, 106380844|LOC106380844, 106369010|LOC106369010, 106394922|LOC106394922, 106397859|LOC106397859, 106403778|LOC106403778, 106389899|LOC106389899, 106381770|LOC106381770, 106369850|LOC106369850, 106346301|LOC106346301, 106438196|LOC106438196, 106381430|LOC106381430, 106348419|LOC106348419, 106390223|LOC10…
bna04933	Human Diseases	Endocrine and metabolic disease	AGE-RAGE signaling pathway in diabetic complications	0.00281	0.993551	106387397|LOC106387397
bna00030	Metabolism	Carbohydrate metabolism	Pentose phosphate pathway	0.00228985	0.994741	106349212|LOC106349212, 106382027|LOC106382027, 106381931|LOC106381931, 106381915|LOC106381915
bna00970	Genetic Information Processing	Translation	Aminoacyl-tRNA biosynthesis	0.0010089	0.99768	106445274|LOC106445274, 106365664|LOC106365664, 106447892|LOC106447892, 106441506|LOC106441506, 106446377|LOC106446377, 106365663|LOC106365663
bna01230	Metabolism	Global and overview maps	Biosynthesis of amino acids	0.000869865	0.997999	106365675|LOC106365675, 106389628|LOC106389628, 106345635|LOC106345635, 106451798|LOC106451798, 106436527|LOC106436527, 106368856|LOC106368856, 106384874|LOC106384874, 106452368|LOC106452368, 106402942|LOC106402942, 106438398|LOC106438398, 106445767|LOC106445767, 106406022|LOC106406022, 106381286|LOC106381286, 106441215|LOC106441215, 106382027|LOC106382027, 106399829|LOC106399829, 106362401|LOC10…
bna04141	Genetic Information Processing	Folding, sorting and degradation	Protein processing in endoplasmic reticulum	0.000548311	0.998738	106451757|LOC106451757, 106451283|LOC106451283, 106386751|LOC106386751, 106397237|LOC106397237, 106386752|LOC106386752, 106397623|LOC106397623, 106415667|LOC106415667, 106380873|LOC106380873, 106385158|LOC106385158, 106395362|LOC106395362, 106368214|LOC106368214, 106451510|LOC106451510, 106381573|LOC106381573, 106401239|LOC106401239, 106416184|LOC106416184, 106394922|LOC106394922, 106353095|LOC10…
bna04144	Cellular Processes	Transport and catabolism	Endocytosis	0.000178461	0.999589	106361087|LOC106361087, 106367016|LOC106367016, 106415086|LOC106415086, 106401239|LOC106401239, 106353095|LOC106353095, 106358393|LOC106358393, 106357943|LOC106357943, 106388197|LOC106388197, 106381813|LOC106381813, 106411160|LOC106411160, 106382762|LOC106382762, 106376200|LOC106376200, 106375252|LOC106375252, 106406661|LOC106406661, 106451548|LOC106451548, 106387659|LOC106387659, 106381798|LOC10…
bna00195	Metabolism	Energy metabolism	Photosynthesis	0.000111684	0.999743	106416986|LOC106416986, 106358244|LOC106358244, 106358252|LOC106358252, 106415924|LOC106415924
bna00190	Metabolism	Energy metabolism	Oxidative phosphorylation	8.92967e-05	0.999794	106406037|LOC106406037, 106358546|LOC106358546, 106444819|LOC106444819, 106384822|LOC106384822, 106354666|LOC106354666, 106438778|LOC106438778, 106369006|LOC106369006, 106376917|LOC106376917, 106361151|LOC106361151, 106382939|LOC106382939, 106375496|LOC106375496, 106396960|LOC106396960, 106411173|LOC106411173, 106354655|LOC106354655, 106349474|LOC106349474, 106452560|LOC106452560, 106449323|LOC10…
bna03015	Genetic Information Processing	Translation	mRNA surveillance pathway	2.56111e-05	0.999941	106418167|LOC106418167, 106378491|LOC106378491, 106382941|LOC106382941, 106403808|LOC106403808, 106380886|LOC106380886, 106416077|LOC106416077, 106360403|LOC106360403, 106414799|LOC106414799, 106353885|LOC106353885, 106395526|LOC106395526
bna03013	Genetic Information Processing	Translation	Nucleocytoplasmic transport	8.50723e-06	0.99998	106433858|LOC106433858, 106389825|LOC106389825, 106386571|LOC106386571, 106433386|LOC106433386, 106381563|LOC106381563, 106378491|LOC106378491, 106385719|LOC106385719, 106393390|LOC106393390, 106349121|LOC106349121, 106445262|LOC106445262, 106388552|LOC106388552, 106376729|LOC106376729, 106406544|LOC106406544, 106354830|LOC106354830, 106364690|LOC106364690
bna04145	Cellular Processes	Transport and catabolism	Phagosome	4.80194e-07	0.999999	106354666|LOC106354666, 106438778|LOC106438778, 106385711|LOC106385711, 106358436|LOC106358436, 106396960|LOC106396960
