# Supplementary material for: Cytokinin Signaling Are Required for Multi-Main Stems Development in <em>Brassica napus</em> L.
Source: Preprints.org preprint supplement (doi:10.20944/preprints202304.0586.v1), 2023-04-19
Supplement: Supplementary file 5 [file Table S4.xlsx]

## Sheet: heatmap
Supplemental Data 4. FPKM values of CK-related genes in WT and MS mutant at different DAG.
ST: Time after germination of single-stem plants (WT), MT: Time after germination of multi-stems (MS) mutants.
Gene ID	Gene name	ST15-replicate 1	ST15-replicate 2	ST15-replicate 3	MT15-replicate 1	MT15-replicate2	MT15-replicate 3	ST20-replicate 1	ST20-replicate 2	ST20-replicate 3	MT20-replicate 1	MT20-replicate2	MT20-replicate 3	ST25-replicate 1	ST25-replicate 2	ST25-replicate 3	MT25-replicate 1	MT25-replicate2	MT25-replicate 3	ST30-replicate 1	ST30-replicate 2	ST30-replicate 3	MT30-replicate 1	MT30-replicate2	MT30-replicate 3	ST35-replicate 1	ST35-replicate 2	ST35-replicate 3	MT35-replicate 1	MT35-replicate2	MT35-replicate 3
LOC106374136	CKX3	0	0	0	0	0	0	0	0	0	1.24218	1.13314	1.1136	0.088169	0	0	0	0	0	0.193961	0	0	0.099769	0	0.025024	0	0.130483	0	0	0	0
LOC106415860	CKX6	4.62296	4.97602	2.47929	3.82185	3.60094	3.79984	4.90286	3.80906	1.11348	5.5987	8.53614	10.1226	3.32011	3.85894	1.48493	5.94866	6.51621	3.84847	3.56318	2.99958	2.42502	11.6864	4.50743	4.94789	19.3609	6.17039	2.53643	1.38287	1.25043	2.60491
LOC106406332	CKX6	2.98084	3.90598	2.41849	3.32554	2.66836	3.82102	3.70253	6.83896	1.29018	7.54102	7.7405	8.77779	3.99963	3.45906	1.82816	6.0588	4.96674	3.85652	2.35276	2.01833	1.78372	10.5868	4.38876	4.22708	14.2075	4.75679	1.88136	0.733218	0.766506	1.38753
LOC106384861	CKX7	1.31555	0.540017	1.19568	1.52926	2.43029	0.899055	1.59718	0.910442	1.98467	4.07399	4.34807	2.17343	0.720312	1.03864	0.581386	2.91968	3.76947	2.26449	1.26086	0.722444	1.16006	1.75414	1.89908	1.96923	0.857155	0.721333	0.601709	2.0087	1.60867	2.69004
LOC106406751	CKX7	0.611728	0.389031	0.742064	1.00769	1.44997	0.616451	1.25749	0.573606	0.876025	1.87494	2.06844	0.783779	0.322406	0.624933	0.227305	1.45403	2.2325	1.58901	0.908095	0.341023	0.898207	1.24658	1.38036	1.15282	0.568976	0.406946	0.521614	1.36889	0.81703	1.33798
LOC106365552	CKX7	0.731943	0.633682	0.944424	1.24381	1.63898	0.52528	0.906807	0.517457	1.40454	2.72998	2.77359	1.70017	0.480183	0.668444	0.360777	1.56628	1.78537	1.26893	0.874018	0.508942	0.76884	1.44295	1.35504	1.27939	0.609888	0.414476	0.435175	1.34461	1.05567	1.86971
LOC106396898	LOG1	1.40067	3.71089	3.69889	4.14911	3.6137	2.13739	2.70791	0.747508	0.245098	0.101973	0.576971	0.620166	1.54188	2.6235	3.09439	0.495053	0.377249	0.658096	2.13366	1.0574	0.684652	2.39202	0.968309	0.833076	2.32572	2.03984	3.24537	0.614375	1.32001	0.95035
LOC106352601	LOG1	3.60337	7.21624	4.93748	5.96036	3.90203	3.05959	3.4867	1.90104	1.55074	1.29057	1.40579	2.59975	4.46704	3.05666	4.63258	0.765476	1.26612	1.45035	3.96847	3.10414	1.97261	2.64131	2.08221	2.93773	4.12003	2.81518	4.24309	0.812654	1.18501	1.89115
LOC106381774	LOG1	0.40054	0.841054	0.740799	1.14542	0.963087	0.266476	0.19299	0.144858	0.070724	0	0.10532	0.210954	0.184796	0.472637	0.497733	0.075635	0.065344	0.127709	0.464989	0.21889	0.06637	0.347494	0.234584	0.224547	0.573664	0.354691	0.738251	0.238531	0.181749	0.284397
LOC106446715	LOG1	6.4704	10.657	6.24858	5.41662	6.84253	4.16587	6.66204	3.11509	1.61495	2.15016	3.41315	4.43939	4.60466	3.88105	3.97199	2.18843	2.93886	4.46566	3.9674	3.49431	1.77597	2.45397	3.48696	1.51677	6.6954	2.58612	7.99738	0.970322	0.849558	1.69782
LOC106356714	LOG4	2.85947	3.24128	3.97506	1.72249	3.55034	3.32521	5.09294	1.73776	1.10214	1.76863	3.18961	3.54224	2.13772	1.82097	1.72185	2.40731	1.60711	2.10164	3.79763	4.2767	3.88228	3.80104	5.10181	4.22863	8.57233	5.88533	3.10191	1.98712	3.08535	2.7611
LOC106375311	LOG5	0.191849	1.20276	0.852428	1.48808	2.02677	0.291173	0.222998	0	0.161657	0	0.521968	0.174535	0	0	0.070614	0.5419	0.510161	0.299839	0.265292	0.207746	0.662035	0.722241	0.669424	0.737115	0.420731	0.657413	0.311216	1.37644	0.870831	2.11352
LOC106453249	LOG5	1.06526	1.14707	1.21751	1.74997	1.62259	0.957439	0.244168	0.107592	0.428733	0.618178	0.3727	0.368485	0.128658	0.129861	0.069013	1.00973	2.62153	0.963379	2.47221	3.50948	2.72008	0.816729	3.10296	1.81354	0.807701	0.819787	1.17199	1.63264	1.42157	2.25872
LOC106384114	LOG7	0.628515	1.07499	1.12712	0.9785	1.61733	0.576301	1.18497	0.534617	0.872938	1.50786	1.74527	1.53295	0.483784	0.397238	0.105606	0.936469	0.953317	1.26887	0.200551	0.279821	0.127522	0.521995	0.678637	0.492086	0.411184	0.583581	0.33944	0.358987	0	0.493649
LOC106440364	LOG8	4.31642	6.33373	7.97208	7.95231	6.83492	5.73395	6.42938	11.3265	5.12609	2.99029	2.51075	6.43208	10.1684	8.86538	12.6582	3.96892	3.91371	5.41071	4.02598	2.81726	2.74232	3.60805	2.60233	4.23524	1.63713	3.64605	6.91247	3.15039	3.00665	2.39865
LOC106364020	LOG8	3.96143	6.05767	6.84624	6.43118	6.78593	4.65158	6.05977	8.05674	4.68869	2.65533	3.89279	8.26939	8.09223	7.46459	10.5306	2.52596	3.91499	6.13445	3.64781	2.14269	2.09849	3.43828	3.17928	3.69749	1.87586	3.32328	7.73392	2.83881	2.47396	2.56579
