# Supplementary material for: Cytokinin Signaling Are Required for Multi-Main Stems Development in <em>Brassica napus</em> L.
Source: Preprints.org preprint supplement (doi:10.20944/preprints202304.0586.v1), 2023-04-19
Supplement: Supplementary file 6 [file Table S5.xls]

## Sheet: primers
Supplemental Data 5. The primers used for RT-qPCR.
Gene ID	Gene name	Forward primer	Reversed primer
LOC106415860	CKX6	CCTCATTCACAGCTCACGGT	GCAAGCCCGTACTTTAGGGT
LOC106384861	CKX7-1	TGAACTGCGTGAAGCCTCTT	CCCGCCGGGTAAATAACCAA
LOC106406751	CKX7-2	GTCGACAAGGACCGCTTTGA	GGCAAATCCACCTCGAACCT
LOC106365552	CKX7-3	TCTTTTGATGGCGTCTCCGA	CTTCACGCAGTTCATGCCAC
LOC106384114	LOG7	ACAAGGATCTGAGAATCCCGTC	ACGTACCATACCCACCAGGA
LOC106440364	LOG8	TCAAGGAGCCCTATTGAAAATCTTTTGCC	TTAAGAATCTCCAGCCAGTTGCTCAAC
BnACTIN7	actin7	CCCTGGAATTGCTGACCGTA	TGGAAAGTGCTGAGGGATGC
